# 1 **A sex chromosome drives the emergence of vocal learning following hormonal manipulation in** 2 **female zebra finches**

3  
4 Matthew Davenport<sup>1</sup> & Ha Na Choe<sup>2</sup>, Hiroaki Matsunami<sup>2,3</sup>, Erich D. Jarvis<sup>1,4</sup>

5  
6 1: Laboratory of Language Neurogenetics, The Rockefeller University, New York, NY, USA.

7 2: Department of Molecular Genetics and Microbiology,

8 3: Department of Neurobiology, Duke Institute for Brain Sciences, Duke University School of Medicine,  
9 Durham, NC, USA

10 4: Howard Hughes Medical Institute, Chevy Chase, MD

11

12 Zebra finches are sexually dimorphic vocal learners. Males learn to sing by imitating mature  
13 conspecifics, but females do not. The lack of vocal learning in females is associated with anatomical  
14 differences in the neural circuits responsible for vocal learning, including the atrophy of several brain  
15 regions during development<sup>1</sup>. However, this atrophy can be prevented and song learning retained in  
16 females after pharmacological estrogen treatment<sup>2-4</sup>. Little is known about the genetic machinery  
17 controlling this sex and estrogen responsive song system development. To screen for drivers, we  
18 performed an unbiased analysis of transcriptomes from song control nuclei and surrounding motor  
19 regions in zebra finches of either sex treated with 17- $\beta$ -estradiol or vehicle until sacrifice on day 30,  
20 when divergence between the sexes is anatomically apparent. Utilizing the newly assembled  
21 autosomes and sex chromosomes from the zebra finch Vertebrate Genomes Project assemblies<sup>5</sup>, we  
22 identified correlated gene modules that were associated to song nuclei in a sex and estradiol  
23 dependent manner. Female estradiol treated HVC, in the vocal learning circuit, acquired the smallest of  
24 the modular specializations observed in male HVC. This module was enriched for genes governing  
25 anatomical development, and it's specialization was disproportionately influenced by the expression of Z  
26 sex chromosome transcripts in HVC. We propose that vocal learning may be prevented in female zebra  
27 finches via the suppression of an estrogen inducible Z chromosome *cis*-acting regulatory element.

## 28 Main

29 Vocal learning is the ability to imitate sounds. In humans, vocal learning is a necessary and specialized  
30 component for spoken language and song. Though no animal produces human-like language, the most  
31 similar phenotypes are found in 7 non-human clades of vocal learners, four mammalian and three  
32 avian, each having independently evolved the trait<sup>6</sup>. Oscine songbirds have proved to be the most  
33 tractable for studying vocal learning in the lab, with much of the field focusing on the Australian zebra  
34 finch (*Taeniopygia guttata*). Despite ~300 million years of separation since a common ancestor<sup>7,8</sup>, there  
35 is remarkable evolutionary convergence between songbird and human vocal learning in terms of the  
36 behavioral progression, the developmental effects of deafening, the anatomical connectivity of  
37 vocal-motor learning circuits, the sites of accelerated evolution within the genome, and even the  
38 specific genes that mark song and speech circuits with higher or lower specialized expression against  
39 the surrounding motor control circuits<sup>6,9–15</sup>. Unlike in humans, however, vocal learning is strongly  
40 sexually dimorphic in zebra finches<sup>1</sup>. Male zebra finches learn to produce a species appropriate song  
41 by imitating mature conspecifics during juvenile development, while females are limited to producing  
42 innate calls<sup>16</sup>.

43 The adult male zebra finch brain song system includes four major interconnected telencephalic  
44 song control nuclei; HVC (proper name) in the dorsal nidopallium (DN); the lateral magnocellular  
45 nucleus of the anterior nidopallium (LMAN) found in the anterior nidopallium (AN); the robust nucleus of  
46 the arcopallium (RA) in the lateral intermediate arcopallium (LAI); and Area X in the striatum (Str; **Fig.**  
47 **1a**)<sup>11</sup>. During juvenile development in females HVC and RA atrophy, the striatal song nucleus Area X  
48 never appears, and HVC fails to form synapses in RA<sup>1,17–24</sup>. Amazingly, female zebra finches treated  
49 with estrogen or a synthetic analog at an early age do not exhibit song system atrophy and instead form  
50 a functional neural circuit with all the anatomical components and connections seen in males<sup>2–4,25</sup>. This  
51 “masculinized” song system allows estrogen supplemented females to vocally imitate adult male  
52 conspecifics, though not with the same accuracy as males<sup>2,4,26</sup>. Interestingly, lesioning female HVC  
53 prevents estrogen dependent anatomical “masculinization” of its postsynaptic targets, RA and Area X<sup>27</sup>.

54 The genetic basis of estrogen sensitive, sexually dimorphic zebra finch vocal learning remains  
55 largely unknown. However, the examination of a rare gynandromorphic zebra finch with lateralized sex  
56 chromosome composition indicates that genetically male Area X and HVC are larger than their female  
57 analogs independent of gonadal hormone production, implicating sex chromosome gene expression  
58 within the song system<sup>28</sup>. Unlike the mammalian X and Y, birds use the Z and W sex determination  
59 system where females are hemizygotic (ZW), and males homozygotic (ZZ)<sup>29</sup>. The relevant  
60 transcriptional machinery must also be set up by posthatch day 30 (PHD30), after which estrogen fails  
61 to masculinize female brains or behavior and the male song system enlarges while the female song  
62 system atrophies<sup>2,17,19,30</sup>. To screen for genetic drivers and locate their action within the song system, we  
63 performed an unbiased analysis of transcriptomes from song system components and surrounding  
64 motor control regions in zebra finches of either sex treated with 17- $\beta$ -estradiol (E2) or vehicle until  
65 sacrifice at PHD30. We used a new zebra finch genome assembly and annotation produced by the  
66 Vertebrate Genomes Project containing both the Z and W<sup>5</sup>, to identify candidate drivers of vocal  
67 learning loss in females from the sex chromosomes.

68

## 69 Identification of gene modules

70 We used RNA-Seq data from a previous study on the effects of E2 manipulation on the song system  
71 which was analyzed using a differential expression approach after mapping reads to an older genome  
72 lacking the W sex chromosome<sup>26</sup>. We first re-mapped RNAseq reads to the new assembly from the four  
73 major song nuclei (HVC, LMAN, RA, and Area X) and their adjacent non-vocal motor surrounds (DN,  
74 AN, LAI, and Str respectively; **Fig. 1a**), taken from quiet males and females at 30 days old; treated with  
75 either E2 or a vehicle control since hatch (**Fig. 1b**)<sup>26</sup>. The non-vocal surrounds allow us to examine  
76 specialized up- or down-regulated gene expression patterns in the song control nuclei<sup>12,13</sup>.

77 Within the mapped gene expression data, we asked the following five questions: “What were the  
78 specialized gene expression profiles of males at PHD30?”; “Which female song nuclei were specialized  
79 by E2?”; “What were the gene networks implicated in that specialization?”; “Which genes most strongly  
80 drove this specialization?”; and “Are the sex chromosomes involved, and if so how?”. To do this in an  
81 unbiased way, we performed weighted gene correlation network analysis (WGCNA) to first decompose  
82 the transcriptome into actively expressed gene modules by performing iterative hierarchical clustering  
83 on the matrix of gene-to-gene correlations in expression across samples<sup>31</sup>. Of the ~21,000 annotated  
84 zebra finch genes, 13,220 were expressed in the finch telencephalon and assigned to one of 14  
85 co-expression modules, a comparable number of genes to what we have seen expressed in adult zebra  
86 finch telencephalon<sup>14,32</sup>. Two of the modules clearly marked single samples (**Fig. S2**), indicative of  
87 technical overfitting, and were excluded from further analysis. The remaining 12 modules, including  
88 12,444 genes, were dynamically expressed across brain regions and treatment groups, which we  
89 lettered in descending order of size A through L, containing from 4,890 to 127 constituent genes (**Fig.**  
90 **1c**).

### 92 **PHD30 female HVC and Area X lack specialized gene modules**

93 To answer our first question of modules specialized to male song nuclei, we first calculated the module  
94 eigengene (MEG) for each of our modules (**Fig. 1d**). MEGs are the first principle component of  
95 variance of all genes in a module and can be thought of as an aggregate measure of expression for  
96 each module’s expression across samples. We then associated gene modules to song nuclei by  
97 correlating MEG expression song system membership for each nucleus against its respective surround  
98 (e.g. RA vs. LAI) in vocal learning males (**Fig. 2a**). As expected, the male song system was strongly  
99 specialized in each of the four nuclei. Male HVC was specialized relative to DN by the significant  
100 differential expression of modules B,C,F, and G; LMAN was specialized relative to the surrounding AN  
101 by modules B,F,G, and I; RA was specialized relative to LAI by modules A,C, and G; and Area X was  
102 specialized relative to the Str by modules C,E,F,G, and I. To address our second question, we found  
103 that in vehicle-treated females, LMAN and RA exhibited similar gene module specialization patterns  
104 observed in males, appearing well set up for vocal learning even in the absence of E2. In contrast,  
105 neither the female vehicle HVC nor Area X showed significant gene module specializations against  
106 their surrounds, making them more likely sites of E2 action (**Fig. 2b**).

### 108 **E2 sensitive HVC module for tissue expansion**

109 To answer our third question and determine whether exogenous E2 caused specialized gene module  
110 expression within the song system in females, we compared MEG expressions in female-E2-HVC  
111 samples to the combination of female-E2-DN, female-Veh-DN, and female-Veh-HVC samples. We  
112 identified a single module whose expression was specialized in HVC of E2-treated females, and it was  
113 the same module G found in male HVC (**Fig. 2c**). This was the smallest of the four modules specialized  
114 in male HVC relative to DN, containing 344 genes (**Table S1**). To understand the biological function of  
115 this gene module, we mapped the zebra finch genes to their 1:1 human orthologs where possible and  
116 then used human gene annotation to examine the Gene Ontology (GO) functions enriched within the  
117 module G constituent genes (**Table 1**). We found significantly enriched GO terms, which included “DNA  
118 binding transcription factor activity”, “cell differentiation”, “anatomical morphogenesis”, “cell to cell  
119 signaling”, and “positive regulation of multicellular organism growth”, indicating that module G genes  
120 likely enact a proliferative developmental program. Other significantly enriched terms such as  
121 “extracellular matrix structural component”, “external side of the plasma membrane”, and “extracellular  
122 space” indicate that this module may also act to restructure the extracellular matrix, perhaps to  
123 accommodate new cells.

124 We also compared female-E2-Area X samples to all other female samples from the striatum,  
125 and found specialized expression module G, as well as modules C and F (**Fig. 2c**). The strong signal  
126 here is consistent with female Area X being completely absent without E2 and its presence depending  
127 on HVC masculinization by E2<sup>27</sup>. For RA of E2 treated females we found specialized modules A and C  
128 (**Fig. 2d**) and for LMAN specialized modules C,F,G (**Fig. 2c**). Unlike the module G specialization in  
129 HVC, both the female-E2 treated RA (module A,C) and LMAN (module C,F,G) module specializations  
130 were also present in females given the vehicle (**Fig. 2b**), making the observed RA and LMAN  
131 specializations unlikely to be causative for the gain of vocal learning in females after E2 treatment.  
132

### 133 **Telencephalic sexually responsive gene module**

134 We next examined MEG associations to sex differences and E2 responses within the song system (**Fig.**  
135 **2d**) and surrounding brain regions (**Fig. 2e**). Sex differences were compared between vehicle treated  
136 males and females. Here we found that module G was expressed higher in the vocal learning capable  
137 male HVC than the non-vocal learning capable female HVC. Module G similarly responded to sex  
138 within Area X, however since Area X is absent in vehicle treated females this comparison likely reflects  
139 the sexually dimorphic existence of Area X rather than a sex specific specialization. Module C  
140 expression was significantly higher in both female LMAN and RA relative to their male counterparts. In  
141 contrast, we found that gene module E was sexually dimorphic throughout the telencephalon, both in  
142 song nuclei and surrounding regions. Specifically, the eigengene for module E was highly expressed in  
143 males, and lowly expressed in females.  
144

### 145 **Gene modules enriched on specific chromosomes**

146 We then determined whether any modules were enriched in genes from specific chromosomes. After  
147 bootstrapping the mapping between genes and modules to approximate a multiple test corrected  
148 upper-bound confidence interval for each chromosome-module pairing, we found genes in 8 of the 12  
149 modules were enriched on specific chromosomes (**Fig. 3a**). The most striking effect observed was the  
150 enrichment of module E genes on the Z and W sex chromosomes, with nearly all W expressed genes  
151 and ~2/3 of Z expressed genes being members of module E. This explains why the eigengene of module  
152 E consistently exhibited higher expression in the male telencephalon regardless of treatment (**Fig.**  
153 **2d,e**). When considering gene membership in module E as a continuous variable over the whole  
154 transcriptome by correlating each gene to the module's eigengene, we found that levels of Z and W  
155 transcripts were anticorrelated within this module (**Fig. 3b**), indicating that Z chromosome transcripts  
156 were generally depleted in female brains with W chromosome expression. This broad reduction in Z  
157 chromosome transcript abundance is consistent with the finding that diploid Z chromosomes do not  
158 inactivate in male birds to compensate for gene dosage, unlike the X inactivation seen in female  
159 mammals<sup>28,33</sup>.

160 Other significant mappings included the largest module, module A, a component of RA's  
161 specialization, being slightly enriched across several macro-chromosomes (Chr1, 2, 3, 4, and 10).  
162 Interestingly, *FOXP2*, a language associated gene in humans<sup>34</sup> and vocal learning associated gene in  
163 songbirds<sup>35</sup> appeared to be a potent driver of module A, correlating with MEG-A at  $r^2 = 0.92$ .  
164 Conversely, module D, which did not associate with any experimental variables in our data, was  
165 enriched across micro-chromosomes (Chr22, 25, 27, 28, 29, and "other"). Module B, a component of  
166 the male HVC specialization, was enriched on chromosome 1A; module B also showed enrichment for  
167 genes with convergent specialized expression between zebra finch HVC and layer 2/3 neurons of the  
168 human laryngeal motor cortex<sup>14</sup> (**Fig. 2g**). No modules were enriched for the gene set convergently  
169 regulated between zebra finch RA and layer 5/6 neurons of the human laryngeal motor cortex (**Fig. 2h**).  
170 Module F, a component in HVC, LMAN, and Area X specializations, was enriched on chromosome 2. In  
171 addition to module D, both modules J and K were enriched on "other", a category that includes newly  
172 identified zebra finch micro-chromosomes<sup>36</sup>. These findings indicate a remarkable association between  
173 the structure of song nuclei gene expression networks, measured in an unbiased way with WGCNA,  
174 and the chromosomal structure of the genome.

175

### 176 **Interactions between vocal learning and sex chromosome modules**

177 As it is unlikely that the gene modules act independently of each other, we sought putative interacting  
178 genes between two modules of interest, the HVC vocal learning responsive module G and the sex  
179 chromosome dominated module E. To do this, we went beyond the binary, in-or-out module  
180 membership used to initially calculate MEGs and defined continuous module membership as the  
181 correlation ( $r^2$ ) between a given gene's expression and any given MEG<sup>31</sup>. This allowed us to quantify  
182 the extent to which any gene is associated with any of the modules. Looking across all assigned genes  
183 for our modules of interest, we identified two outlier genes, *PDE8B* and *HABP4*, which were the E most  
184 gene assigned to module G and the G most gene assigned to module E, respectively (**Fig. 2f**). Both of  
185 these genes were found on the Z chromosome. *PDE8B* catalyzes the hydrolysis of the second  
186 messenger cAMP and mutations to the gene cause an autosomal dominant form of striatal  
187 degeneration in humans<sup>37</sup>. *HABP4* is an RNA binding protein, known to repress the expression and  
188 subsequent DNA binding of *MEF2C*<sup>38</sup>, a Z chromosome transcription factor which has undergone a  
189 dramatic accelerated evolution in songbirds<sup>15</sup> and whose repression by *FOXP2* is critical for  
190 cortico-striatal circuit formation in mice related to vocal behaviors<sup>39</sup>.

191

### 192 **Gene drivers of E2-treated female HVC specialization**

193 To reduce the 344 genes in module G to the putative drivers of vocal learning in HVC and address our  
194 fourth question, we next examined the relationship of continuous membership in module G (correlation  
195 to MEG-G) to gene expression specialization in vocal learning capable HVC at the level of single  
196 genes. We did this separately for each of the four vocal learning comparisons discussed above: 1) male  
197 HVC specialization; 2) female E2 treated specialization; 3) HVC sexual dimorphism; 4) HVC E2  
198 response (**Fig. 4a**). We defined genes of interest as having  $r^2 \geq 0.5$  for both vocal learning specialization  
199 and module G membership in any single comparison (**Fig. 4b**). All such genes exhibited a positive  
200 correlation to vocal learning ability across sample sets (**Fig. 4b**), meaning that their expression was  
201 higher in vocal learning capable HVC relative to non-vocal learning controls.

202 We next intersected these four HVC specialized gene sets to generate the core genes list for  
203 module G involvement in E2 and sex dependent HVC development (**Fig. 4c**). We found 15 genes  
204 which strongly mark vocal learning capable HVC in all comparisons and also appear to drive module G  
205 expression (**Table 2, Fig. S3**). To address our fifth and final question, we examined the chromosomes  
206 of origin for these 15 core genes and found that four (*GHR*, *LRRC2*, *RGS7BP*, and *THBS4*) were on  
207 the Z sex chromosome (**Fig. 4d**). This > 4-fold enrichment of Z chromosome transcripts within the core  
208 gene set was statistically significant ( $p = 0.0016$ , upper-tailed hypergeometric test) against a  
209 background of module assigned genes. This result was statistically significant regardless of the  
210 background gene set when using all genes (~21,000) or only module G members (344). These four Z  
211 chromosome module G genes in HVC all exhibited > 50% reduced expression in vehicle-treated female  
212 HVC relative males, as expected for Z chromosome transcripts, but with increased HVC expression  
213 following E2 treatment (**Fig. S3**). This indicates that these transcripts are subject to additional, E2  
214 sensitive transcriptional regulation that does not affect other genes from the Z chromosome in HVC.

215 Of the 15 core genes, several have been previously studied in the brains of other species which  
216 could inform their role in vocal learning systems. *THBS4* encodes a secreted extracellular-matrix  
217 glycoprotein necessary for appropriate neuronal migration in the mouse<sup>40</sup> and is elevated 6-fold in the  
218 human cortex compared with non-vocal learning primates<sup>41</sup>. Human *EDA2R* was recently identified as a  
219 top correlate of cognitive performance and brain size<sup>42</sup>; it was also found in a human GWAS study to  
220 correlate with circulating estrogen and testosterone levels<sup>43</sup>. Rare mutations in human *PHETA1* lead to  
221 Lowe oculocerebrorenal syndrome, the pathophysiology that includes seizures, mental retardation, and  
222 structural brain abnormalities<sup>44,45</sup>. *SIX2* is a homeobox domain containing transcription factor that  
223 governs early brain and craniofacial development, and provides neuroprotection from dopamine  
224 injury<sup>46,47</sup>. Perhaps one of the most relevant genes to atrophy of HVC in females, is the growth hormone  
225 receptor (*GHR*), which encodes a transmembrane receptor whose activation controls cell division<sup>48</sup>.  
226 The GHR ligand, growth hormone, has interestingly been shown to be duplicated and undergoing  
227 accelerated evolution in the genomes of songbirds, including the zebra finch<sup>49</sup>. Findings in these gene  
228 sets indicate that without estrogen treatment and induction of module G expression, females prevent  
229 the HVC expansion through a sex chromosome mechanism that blocks function of growth and neuronal  
230 migration promoting genes.

231

### 232 **Implications for sexually dimorphic vocal learning**

233 How did E2 treatment produce the transcriptomic effects we observed with module G in female HVC  
234 and what are the implications regarding sexually dimorphic vocal learning in the zebra finch?  
235 Presumably, this process begins with increased estrogen receptor (ER) activity within HVC cells after  
236 being provided surplus activating ligand<sup>50</sup>, which is followed by altered transcription of ER targets in the  
237 genome. This initial transcriptional loading of the system is then processed by gene regulatory networks  
238 within each cell, spreading in effect through the transcriptome. It is possible that differential MEG-G  
239 expression arose purely from traditional gene regulatory networks, where transcription factors form  
240 complex, elaborate feedback networks with themselves, each other, and the genes they regulate.  
241 However, this framework fails to explain why module G transcriptional specialization in vocal learning  
242 HVC was enriched for transcripts from a single chromosome; the Z sex chromosome with halved copy  
243 number in females.

244 We propose that the Z chromosome gene complex identified here may be in part controlled by a  
245 *cis*-acting gene regulatory element on the Z chromosome, activable downstream of ER activity. The  
246 genes regulated by this element may include necessary components in a proliferative transcriptional  
247 program, represented in our data as the enrichment of Z chromosome genes in the drivers of module G  
248 expression in HVC. The module G proliferative program could be specialized to developing male HVC  
249 by the expression of patterning genes, such as *SIX2* early in development, and plausibly maintained  
250 through persistent GHR signaling. We propose this *cis*-acting regulator is normally silent during female  
251 HVC development, a silence enforced by a combination of insufficient Z chromosome dosage, the  
252 expression of W chromosome transcripts, and sex differences in hormone levels. In the subsequent  
253 absence of gene products such as GHR, module G does not specialize in developing female HVC  
254 leading to a less proliferative female HVC late in development. We term this hypothesis the “Z  
255 chromosome *cis*-regulatory song model” of sexually dimorphic zebra finch vocal learning (**Fig. 5**).

256 Our results challenge the traditional notion that hormonal signaling organizes the brain to  
257 produce sexually dimorphic behaviors independent of neuronal sex chromosome content<sup>51,52</sup>. Instead,  
258 our data indicated that sexual dimorphism in zebra finch song learning ability was established by the  
259 interaction of sex hormone signaling and sex chromosome gene expression within the HVC lineage  
260 during development. These findings are thematically similar to work in the Four Core Genotypes mouse  
261 line<sup>53</sup>, where chromosomal and gonadal sex are separable due to translocation of the sex determining  
262 *Sry* gene. In these mice, sex chromosome composition has been shown to affect sexually dimorphic  
263 circuit anatomy, behaviors, and gene expression<sup>53-56</sup>, though the sex chromosome genes responsible  
264 remain unknown in all instances. By leveraging the discrete nature of the song system, the female  
265 zebra finch response to E2, and modern genomic technologies, here we were able to identify specific  
266 candidate genes of vocal learning loss from the Z sex chromosome and describe the sexually  
267 dimorphic, HVC specialized gene network which they participate in.

268 In conclusion, we show that E2 treatment in females induces a subset of gene expression  
269 specializations seen in male HVC and that this specialization is disproportionately influenced by the  
270 expression of Z chromosome transcripts. We hypothesize that these genes are regulated by a Z  
271 chromosome *cis*-regulatory element and are necessary for continued HVC proliferation late in  
272 development. Additional experiments manipulating these genes to both mimic and prevent the action of  
273 E2 in female zebra finches are needed to test this hypothesis, as are comparisons of zebra finch Z  
274 chromosome structural and epigenomic profiles across sex, hormonal manipulation, and development.

## 275 276 **Acknowledgments**

277 We would like to thank G. Gedman, G. Formenti, C. Gilbert, L. Cantin, C. Vargas and J. Manley for  
278 conversations during analysis and visualization. We'd also like to thank A. Vaziri and T. Nöbauer for  
279 providing the computing infrastructure used throughout. This work is a memorial to M. Konishi  
280 (1933-2020) whose work on this topic has influenced us all greatly.

## 281 282 **Author contributions**

283 MD performed all analyses and wrote the paper, HNC gathered all data and edited the paper, HM and  
284 EDJ edited the paper.

## 285 286 **Materials & Correspondence**

287 Correspondence to Erich D. Jarvis.

## 288 289 **Competing interests**

290 We have no competing interests.

## 291 **Materials and Methods**

### 292 *Animal Handling and Sample Preparation:*

293 The samples used in the present analysis are the E2 or vehicle treated subset of a previously published  
294 RNAseq dataset<sup>26</sup>. We briefly re-describe our methodology here.

295  
296 E2 (Sigma E1024-1G) was dissolved in DMSO (100mg/mL) and then diluted in olive oil (1mg/mL).  
297 30-50uL of E2 sample or DMSO only vehicle was applied to the flank of male and female zebra finches  
298 daily from PHD0-PHD14 and on alternating days from PHD15-30 (n=3 per sex-treatment combination).  
299 We have previously shown that this treatment program is sufficient to induce song system  
300 masculinization in E2 treated female zebra finches<sup>26</sup>.

301  
302 On PHD30, animals were sacrificed following one hour of dark isolation. Animals were anesthetized by  
303 isoflurane inhalation and rapidly decapitated. Brain hemispheres were dissected, embedded in OCT,  
304 and flash frozen in an ethanol and dry ice slurry. Sections were taken from the right hemisphere  
305 coronally at 14um onto polyethylene naphthalate (PEN) membrane slides for RNA isolation and  
306 adjacent sections taken on charged glass slides for histology or in-situ hybridizations. From the PEN  
307 membrane slides, song nuclei and surrounding control regions were laser capture microdissected  
308 (LCM) using an ArcturusXT LCM system (Nikon) guided by a Nissl stained tissue series for each  
309 animal.

310  
311 RNA was extracted from the LCM isolated tissue samples using the Arcturus Picopure kit (Applied  
312 Biosystems KIT0204) following manufacturer's instructions. RNA quality was assessed using an Agilent  
313 2100 bio-analyzer and the RNA 6000 pico kit (Agilent 5067- 1513). Next, cDNA was synthesized using  
314 the SMART-Seq v4 Ultra Low input RNA Kit (Takara 634892). Sequencing libraries were made with the  
315 NEBNext Ultra II DNA Library Prep kit (New England Biolabs E7645L) and cleaned-up using  
316 SPRIselect beads (Beck-man Coulter B23317). Libraries were sequenced by Novogene Co., Ltd. on  
317 the Novaseq 6000 platform (Illumina) and S4 flow cells resulting in 150bp paired-end reads.

### 318 319 *RNAseq read mapping and quality control:*

320 RNAseq reads were first trimmed to remove adapters and low quality base calls using Trimmomatic<sup>57</sup>  
321 and then mapped to a high-quality Vertebrate Genomes Project (VGP) female zebra finch nuclear  
322 genome (bTaeGut2.pat.W.v2, GCF\_008822105.2)<sup>5</sup> using STAR (v2.7.1)<sup>58</sup>. These mappings were then  
323 tallied at the level of genes using Rsubread::featureCounts (R-3.6.1) and then counts normalized to  
324 fragments per kilobase of transcript per million mapped reads<sup>59</sup>. Read based quality control was  
325 performed with FastQC (Babraham Bioinformatics) with reports prepared by MultiQC (Python-3.5.5)<sup>60</sup>.  
326 This workflow was automated by the CountMatrix pipeline (<https://github.com/mattisabrat/CountMatrix/>).  
327 We next removed two outlier samples (one male vehicle HVC and one female vehicle RA) based upon  
328 hierarchical clustering of the sample space before computing gene to gene correlations (**Fig. S1**).

### 329 330 *Gene Module Identification:*

331 All remaining analyses were completed in R-3.7.1 and Bioconductor-v19. Data was wrangled in the  
332 tidyverse, and custom visualizations produced with ggplot, RColorBrewer, and ggpubr<sup>61,62</sup>. Unsigned  
333 topological overlaps between genes (gene-to-gene correlations) were calculated in a single block with  
334 WGNCA::blockwiseModules, and then module assignment was performed using  
335 WGCNA::recutBlockwiseTrees specifying a minimum module size of 100 genes<sup>31</sup>.



336 Module association to vocal learning:

337 Module eigengenes (MEGs) from each module were correlated with song system membership/vocal  
338 learning capability and the statistical significance of each correlation assessed using  
339 WGCNA::corPvalueStudent. This was done in the following sample subsets by node: male samples;  
340 female samples; female samples treated with vehicle; song system components from either sex treated  
341 with vehicle; and female song system components of either treatment. There are four comparisons of  
342 vocal learning groups to be drawn within these subsets; the male song system against the surrounds;  
343 the female E2 treated song system against all other female samples; the vehicle treated male song  
344 system against the vehicle treated female song system; and the female E2 treated song system against  
345 the female vehicle treated song system. The comparison of the vehicle treated female song system  
346 against the surrounds (correlation to song system variable) was also performed. In cases where there  
347 were outliers on both sides of a comparison originating from the same animal, we performed post-hoc  
348 two-tailed Wilcoxon rank sum tests using wilcox.test to associate the rank order of MEG expression to  
349 the variable at play for those comparisons.

350

351 Module gene ontology and convergent vocal learning gene expression signature enrichment:

352 Module assigned zebra finch genes were mapped to their 1:1 human orthologs where possible,  
353 dropping unmapped or multi-mapped genes, using orthofindR::getOrthos  
354 (<https://github.com/ggedman/orthofindR>) which wraps Ensembl's biomaRt. We tested for enriched  
355 human gene ontology biological process terms within the human orthologs of each module using  
356 generally applicable gene set enrichment (GAGE) implemented in gage::gage<sup>63</sup>. To determine if the  
357 genes previously shown as convergently differentially expressed in zebra finch RA or HVC and human  
358 dorsal laryngeal motor cortex mapped to specific modules, we treated these two gene lists identically to  
359 GO terms and tested for their significant enrichment across the human orthologs of each module also  
360 using GAGE.

361

362 Module enrichment on chromosomes:

363 To associate modules to chromosomes, we bootstrapped Bonferonni corrected upper bound 95%  
364 confidence intervals for the enrichment of each chromosome-module pairing by randomizing the  
365 mapping of genes to modules 25k times and calculating the enrichments observed on each  
366 chromosome from each module in each randomization to approximate the null distributions.

367

368 Identification of core module G genes in HVC and Z chromosome enrichment:

369 We defined genes of interest as the subset of significantly ( $p < 0.05$ ) vocal learning capability correlated  
370 genes in HVC whose expression correlated to module eigengene G (MEG-G) across the dataset at  $r^2 \geq$   
371 0.5 and to vocal learning at  $r^2 \geq 0.5$  in at least one of the four vocal learning comparisons in HVC, again  
372 calculated using WGCNA::corPvalueStudent. These comparisons were: all male HVC samples against  
373 all male DN samples; female E2 treated HVC against all other female samples at the node, including  
374 vehicle treated HVC; Vehicle treated male HVC against vehicle treated female HVC; and E2 treated  
375 female HVC against vehicle treated female HVC. We defined core genes as those meeting this criteria  
376 for all four HVC vocal learning comparisons. We tested the statistical significance of Z chromosome  
377 enrichment in this core gene list with an upper-tailed hypergeometric test, implemented in phyper,  
378 where each core gene is a sampling event without replacement from module assigned genes.

## 379 **References**

- 380 **1.** Nottebohm, F. & Arnold, A. P. Sexual dimorphism in vocal control areas of the songbird brain.  
381 *Science* **194**, 211–213 (1976).
- 382 **2.** Gurney, M. E. & Konishi, M. Hormone-induced sexual differentiation of brain and behavior in zebra  
383 finches. *Science* **208**, 1380–1383 (1980).
- 384 **3.** Simpson, H. B. & Vicario, D. S. Early estrogen treatment of female zebra finches masculinizes the  
385 brain pathway for learned vocalizations. *J. Neurobiol.* **22**, 777–793 (1991).
- 386 **4.** Simpson, H. B. & Vicario, D. S. Early estrogen treatment alone causes female zebra finches to  
387 produce learned, male-like vocalizations. *J. Neurobiol.* **22**, 755–776 (1991).
- 388 **5.** Rhie, A. *et al.* Towards complete and error-free genome assemblies of all vertebrate species.  
389 *Nature* **592**, 737–746 (2021).
- 390 **6.** Jarvis, E. D. Evolution of vocal learning and spoken language. *Science* **366**, 50–54 (2019).
- 391 **7.** Kumar, S. & Hedges, S. B. A molecular timescale for vertebrate evolution. *Nature* **392**, 917–920  
392 (1998).
- 393 **8.** van Tuinen, M. & Hadly, E. A. Error in estimation of rate and time inferred from the early amniote  
394 fossil record and avian molecular clocks. *J. Mol. Evol.* **59**, 267–276 (2004).
- 395 **9.** Bolhuis, J. J., Okanoya, K. & Scharff, C. Twitter evolution: converging mechanisms in birdsong and  
396 human speech. *Nat. Rev. Neurosci.* **11**, 747–759 (2010).
- 397 **10.** Doupe, A. J. & Kuhl, P. K. Birdsong and human speech: common themes and mechanisms. *Annu.*  
398 *Rev. Neurosci.* **22**, 567–631 (1999).
- 399 **11.** Mooney, R. Neural mechanisms for learned birdsong. *Learn. Mem.* **16**, 655–669 (2009).
- 400 **12.** Pfenning, A. R. *et al.* Convergent transcriptional specializations in the brains of humans and  
401 song-learning birds. *Science* **346**, 1256846 (2014).
- 402 **13.** Feenders, G. *et al.* Molecular mapping of movement-associated areas in the avian brain: a motor  
403 theory for vocal learning origin. *PLoS One* **3**, e1768 (2008).
- 404 **14.** Gedman, G. Songbird brain organization and its molecular convergence with humans for vocal  
405 imitation learning. (Rockefeller University, 2021).
- 406 **15.** James A. Cahill, Joel Armstrong, Alden Deran, Carolyn J. Khoury, Benedict Paten, David Haussler,  
407 Erich D. Jarvis. Positive selection in non-coding genomic regions of vocal learning birds is  
408 associated with genes implicated in vocal learning and speech functions in humans. *Genome Res.*  
409 **16.** The zebra finch: a synthesis of field and laboratory studies. *Choice* **34**, 34–5095–34–5095 (1997).
- 410 **17.** Bottjer, S. W., Glaessner, S. L. & Arnold, A. P. Ontogeny of brain nuclei controlling song learning  
411 and behavior in zebra finches. *J. Neurosci.* **5**, 1556–1562 (1985).
- 412 **18.** Garcia-Calero, E. & Scharff, C. Calbindin expression in developing striatum of zebra finches and its  
413 relation to the formation of area X. *Journal of Comparative Neurology* vol. 521 326–341 (2013).
- 414 **19.** Konishi, M. & Akutagawa, E. Neuronal growth, atrophy and death in a sexually dimorphic song  
415 nucleus in the zebra finch brain. *Nature* **315**, 145–147 (1985).
- 416 **20.** Nixdorf-Bergweiler, B. E. Divergent and parallel development in volume sizes of telencephalic song  
417 nuclei in male and female zebra finches. *J. Comp. Neurol.* **375**, 445–456 (1996).
- 418 **21.** Nordeen, E. J. & Nordeen, K. W. Sex and regional differences in the incorporation of neurons born  
419 during song learning in zebra finches. *J. Neurosci.* **8**, 2869–2874 (1988).
- 420 **22.** Shaughnessy, D. W., Hyson, R. L., Bertram, R., Wu, W. & Johnson, F. Female zebra finches do not  
421 sing yet share neural pathways necessary for singing in males. *J. Comp. Neurol.* **527**, 843–855  
422 (2019).
- 423 **23.** Holloway, C. C. & Clayton, D. F. Estrogen synthesis in the male brain triggers development of the  
424 avian song control pathway in vitro. *Nat. Neurosci.* **4**, 170–175 (2001).
- 425 **24.** Mooney, R. & Rao, M. Waiting periods versus early innervation: the development of axonal  
426 connections in the zebra finch song system. *J. Neurosci.* **14**, 6532–6543 (1994).

- 427 25. Gurney, M. E. Behavioral correlates of sexual differentiation in the zebra finch song system. *Brain*  
428 *Research* vol. 231 153–172 (1982).
- 429 26. Choe, H. N. *et al.* Estrogen and sex-dependent loss of the vocal learning system in female zebra  
430 finches. *Horm. Behav.* **129**, 104911 (2021).
- 431 27. Herrmann, K. & Arnold, A. P. Lesions of HVC block the developmental masculinizing effects of  
432 estradiol in the female zebra finch song system. *J. Neurobiol.* **22**, 29–39 (1991).
- 433 28. Agate, R. J. *et al.* Neural, not gonadal, origin of brain sex differences in a gynandromorphic finch.  
434 *Proc. Natl. Acad. Sci. U. S. A.* **100**, 4873–4878 (2003).
- 435 29. Gianaroli, L., Magli, M. C. & Ferraretti, A. P. Sex Chromosomes. in *Brenner's Encyclopedia of*  
436 *Genetics (Second Edition)* (eds. Maloy, S. & Hughes, K.) 397–400 (Academic Press, 2013).
- 437 30. Konishi, M. & Akutagawa, E. A critical period for estrogen action on neurons of the song control  
438 system in the zebra finch. *Proc. Natl. Acad. Sci. U. S. A.* **85**, 7006–7007 (1988).
- 439 31. Langfelder, P. & Horvath, S. WGCNA: an R package for weighted correlation network analysis.  
440 *BMC Bioinformatics* **9**, 559 (2008).
- 441 32. Gedman, G. *et al.* As above, so below: Whole transcriptome profiling demonstrates strong  
442 molecular similarities between avian dorsal and ventral pallial subdivisions. *J. Comp. Neurol.*  
443 (2021) doi:10.1002/cne.25159.
- 444 33. Itoh, Y. *et al.* Dosage compensation is less effective in birds than in mammals. *J. Biol.* **6**, 2 (2007).
- 445 34. Lai, C. S., Fisher, S. E., Hurst, J. A., Vargha-Khadem, F. & Monaco, A. P. A forkhead-domain gene  
446 is mutated in a severe speech and language disorder. *Nature* **413**, 519–523 (2001).
- 447 35. Teramitsu, I. & White, S. A. FoxP2 regulation during undirected singing in adult songbirds. *J.*  
448 *Neurosci.* **26**, 7390–7394 (2006).
- 449 36. Kim, J. *et al.* False gene and chromosome losses affected by assembly and sequence errors.  
450 *bioRxiv* 2021.04.09.438906 (2021) doi:10.1101/2021.04.09.438906.
- 451 37. Appenzeller, S. *et al.* Autosomal-Dominant Striatal Degeneration Is Caused by a Mutation in the  
452 Phosphodiesterase 8B Gene. *The American Journal of Human Genetics* vol. 86 83–87 (2010).
- 453 38. Kobarg, C. B., Kobarg, J., Crosara-Alberto, D. P., Theizen, T. H. & Franchini, K. G. MEF2C  
454 DNA-binding activity is inhibited through its interaction with the regulatory protein Ki-1/57. *FEBS*  
455 *Lett.* **579**, 2615–2622 (2005).
- 456 39. Chen, Y.-C. *et al.* Foxp2 controls synaptic wiring of corticostriatal circuits and vocal communication  
457 by opposing Mef2c. *Nat. Neurosci.* **19**, 1513–1522 (2016).
- 458 40. Girard, F., Eichenberger, S. & Celio, M. R. Thrombospondin 4 deficiency in mouse impairs  
459 neuronal migration in the early postnatal and adult brain. *Mol. Cell. Neurosci.* **61**, 176–186 (2014).
- 460 41. Cáceres, M., Suwyn, C., Maddox, M., Thomas, J. W. & Preuss, T. M. Increased cortical expression  
461 of two synaptogenic thrombospondins in human brain evolution. *Cereb. Cortex* **17**, 2312–2321  
462 (2007).
- 463 42. Harris, S. E. *et al.* Neurology-related protein biomarkers are associated with cognitive ability and  
464 brain volume in older age. *Nat. Commun.* **11**, 800 (2020).
- 465 43. Ruth, K. S. *et al.* Using human genetics to understand the disease impacts of testosterone in men  
466 and women. *Nat. Med.* **26**, 252–258 (2020).
- 467 44. Kornfeld, M., Synder, R. D., MacGee, J. & Appenzeller, O. The oculo-cerebral-renal syndrome of  
468 Lowe. *Arch. Neurol.* **32**, 103–107 (1975).
- 469 45. Ates, K. M. *et al.* Deficiency in the endocytic adaptor proteins PHETA1/2 impairs renal and  
470 craniofacial development. *Dis. Model. Mech.* **13**, (2020).
- 471 46. Garcez, R. C., Le Douarin, N. M. & Creuzet, S. E. Combinatorial activity of Six1-2-4 genes in  
472 cephalic neural crest cells controls craniofacial and brain development. *Cell. Mol. Life Sci.* **71**,  
473 2149–2164 (2014).
- 474 47. Gao, J. *et al.* Transcription factor Six2 mediates the protection of GDNF on 6-OHDA lesioned  
475 dopaminergic neurons by regulating Smurf1 expression. *Cell Death Dis.* **7**, e2217 (2016).

- 476 **48.** Dehkhoda, F., Lee, C. M. M., Medina, J. & Brooks, A. J. The Growth Hormone Receptor:  
477 Mechanism of Receptor Activation, Cell Signaling, and Physiological Aspects. *Front. Endocrinol.*  
478 **9**, 35 (2018).
- 479 **49.** Yuri, T., Kimball, R. T., Braun, E. L. & Braun, M. J. Duplication of accelerated evolution and growth  
480 hormone gene in passerine birds. *Mol. Biol. Evol.* **25**, 352–361 (2008).
- 481 **50.** Frankl-Vilches, C. & Gahr, M. Androgen and estrogen sensitivity of bird song: a comparative view  
482 on gene regulatory levels. *J. Comp. Physiol. A Neuroethol. Sens. Neural Behav. Physiol.* **204**,  
483 113–126 (2018).
- 484 **51.** Phoenix, C. H., Goy, R. W., Gerall, A. A. & Young, W. C. Organizing action of prenatally  
485 administered testosterone propionate on the tissues mediating mating behavior in the female  
486 guinea pig. *Endocrinology* **65**, 369–382 (1959).
- 487 **52.** Arnold, A. P. The organizational-activational hypothesis as the foundation for a unified theory of  
488 sexual differentiation of all mammalian tissues. *Horm. Behav.* **55**, 570–578 (2009).
- 489 **53.** De Vries, G. J. *et al.* A model system for study of sex chromosome effects on sexually dimorphic  
490 neural and behavioral traits. *J. Neurosci.* **22**, 9005–9014 (2002).
- 491 **54.** Chen, X., Grisham, W. & Arnold, A. P. X chromosome number causes sex differences in gene  
492 expression in adult mouse striatum. *Eur. J. Neurosci.* **29**, 768–776 (2009).
- 493 **55.** McPhie-Lalmansingh, A. A., Tejada, L. D., Weaver, J. L. & Rissman, E. F. Sex chromosome  
494 complement affects social interactions in mice. *Horm. Behav.* **54**, 565–570 (2008).
- 495 **56.** Cox, K. H. & Rissman, E. F. Sex differences in juvenile mouse social behavior are influenced by  
496 sex chromosomes and social context. *Genes Brain Behav.* **10**, 465–472 (2011).
- 497 **57.** Bolger, A. M., Lohse, M. & Usadel, B. Trimmomatic: a flexible trimmer for Illumina sequence data.  
498 *Bioinformatics* **30**, 2114–2120 (2014).
- 499 **58.** Dobin, A. *et al.* STAR: ultrafast universal RNA-seq aligner. *Bioinformatics* **29**, 15–21 (2013).
- 500 **59.** Liao, Y., Smyth, G. K. & Shi, W. featureCounts: an efficient general purpose program for assigning  
501 sequence reads to genomic features. *Bioinformatics* vol. 30 923–930 (2014).
- 502 **60.** Ewels, P., Magnusson, M., Lundin, S. & Käller, M. MultiQC: summarize analysis results for multiple  
503 tools and samples in a single report. *Bioinformatics* **32**, 3047–3048 (2016).
- 504 **61.** Wickham, H. *et al.* Welcome to the tidyverse. *J. Open Source Softw.* **4**, 1686 (2019).
- 505 **62.** Wickham, H. *ggplot2: Elegant Graphics for Data Analysis*. (Springer Science & Business Media,  
506 2009).
- 507 **63.** Luo, W., Friedman, M. S., Shedden, K., Hankenson, K. D. & Woolf, P. J. GAGE: generally  
508 applicable gene set enrichment for pathway analysis. *BMC Bioinformatics* **10**, 161 (2009).

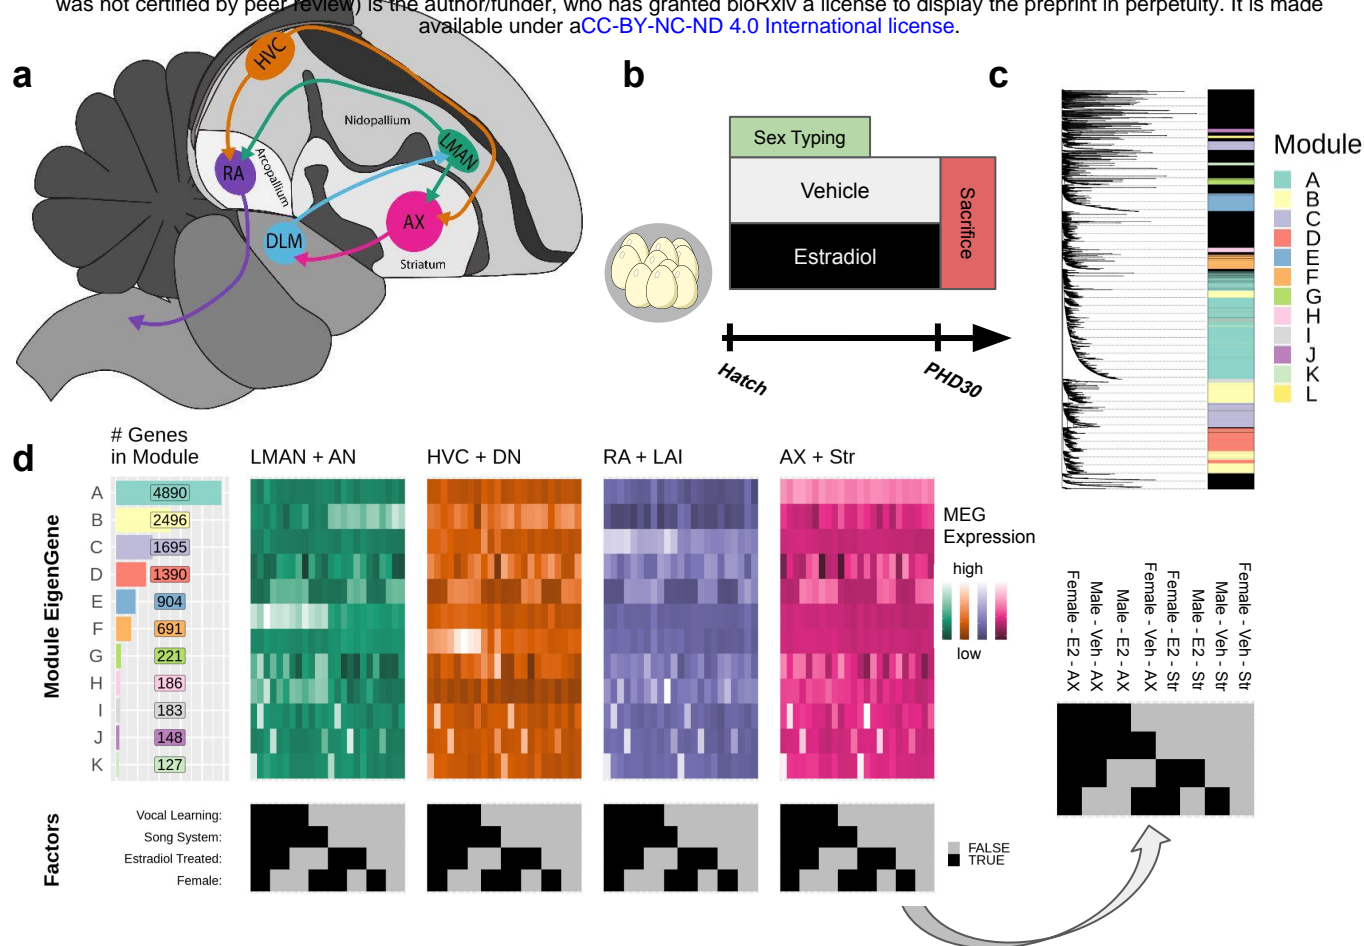

509 **Figure 1 - Song system anatomy and experimental design.** **a**, Diagram of song system  
 510 connectivity within the adult male zebra finch brain. Area X connects back to LMAN through the  
 511 non-vocal specific thalamic nucleus DLM. **b**, Experimental design. Animals were treated with E2 or a  
 512 vehicle from hatch until sacrifice on PHD30. **c**, WGCNA and assignment of genes to modules. Left:  
 513 Hierarchy computed over the transcriptome wide topological overlap matrix. Right: Rows are genes  
 514 colored according to the assigned module, unassigned genes in black. **d**, MEG expression heatmaps  
 515 by module size (left) aligned to traits of interest (bottom). Each row is an MEG and each sample is a  
 516 column with samples grouped by neural circuit node into different colored subpanels.

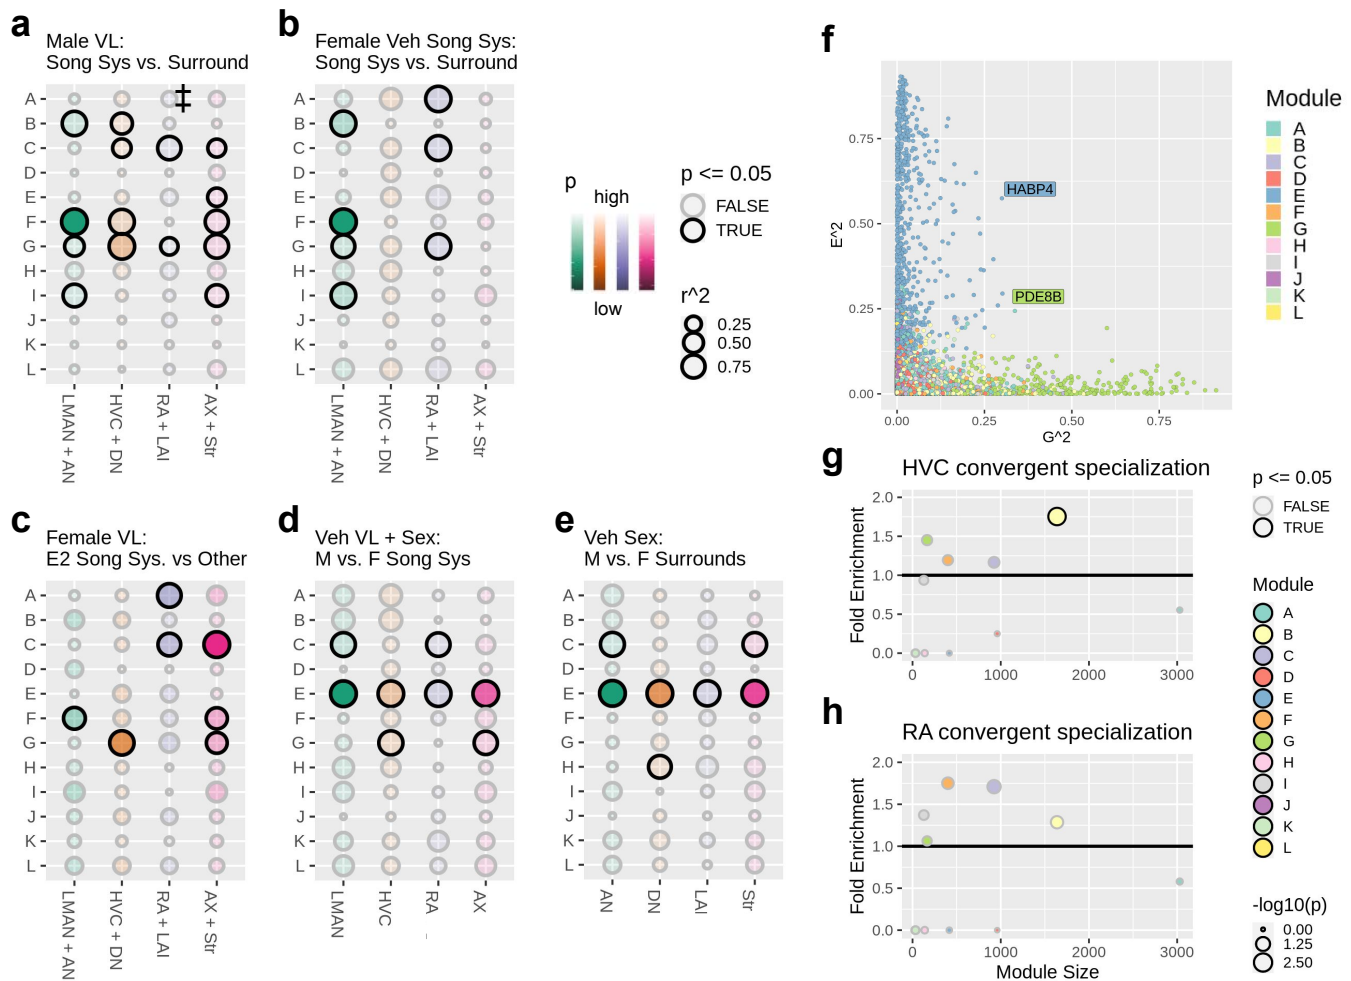

517 **Figure 2 - Association of modules to specific variables.** **a-e**, Results of statistical association  
 518 between MEG expression and variables of interest. Plots show the associations between gene  
 519 modules (rows) to **a**, male song system membership; **b**, vehicle treated female song system  
 520 membership; **c**, female vocal learning after E2; **d**, sexual dimorphism within the song system; **e**,  
 521 sexual dimorphism within the surrounding control regions. Each neural circuit node is considered  
 522 separately (columns). Pearson correlation and Students t test,  $\alpha=0.05$ . Where T test is inappropriate  
 523 because of paired outliers, ‡ indicates  $p=0.06$  by post hoc Wilcoxon rank sum test. **f**, Comparison of  
 524 membership in module E ( $r^2$  to MEG-E, y-axis) and module G ( $r^2$  to MEG-G, x-axis) across module  
 525 assigned genes. **g**, Enrichment of genes previously found to be convergently differentially expressed  
 526 in the human laryngeal motor cortex and either HVC (top) or RA (bottom). Values above the black line  
 527 indicate above random chance.

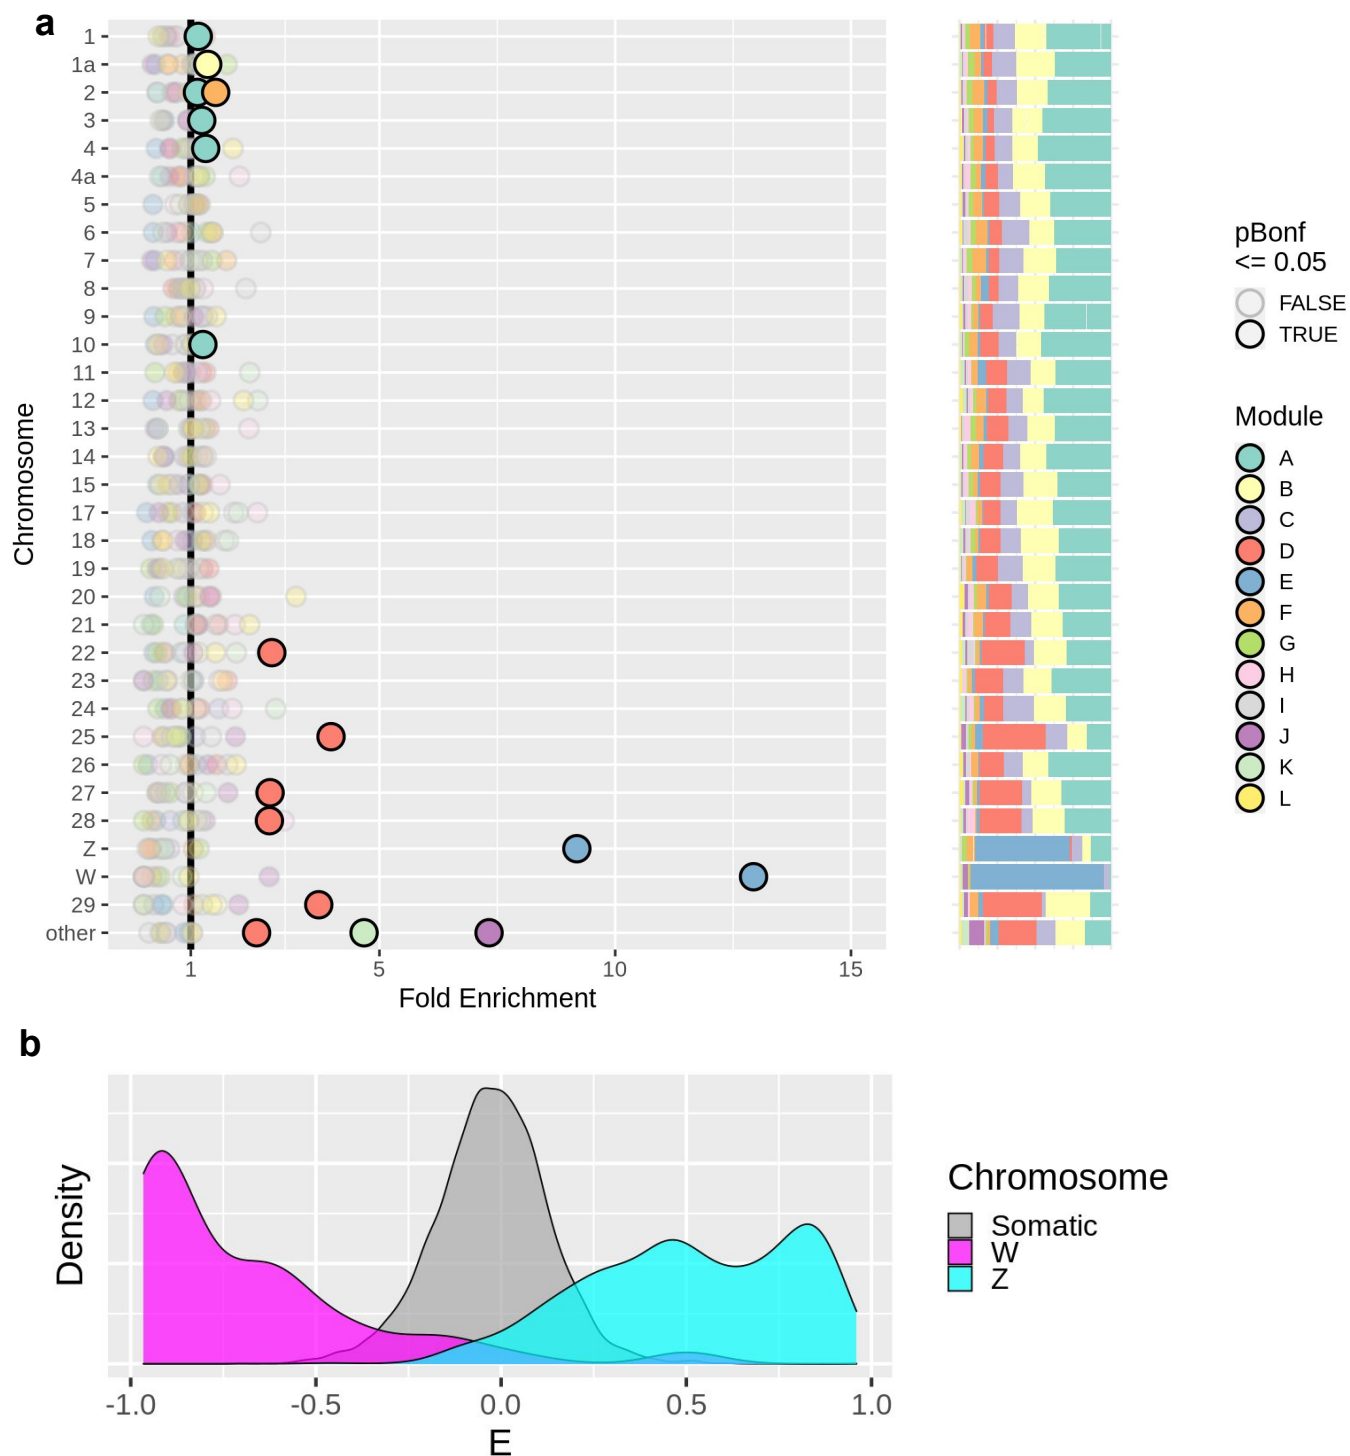

528 **Figure 3 - Gene modules on chromosomes.** **a**, Fold enrichment of modules onto chromosomes  
529 (left) and raw data, the proportion of genes from each chromosome assigned to each module (right).  
530 Values to the right of the vertical black line indicate above random chance. Significance was  
531 assessed using a bootstrapped test of observed enrichment against Bonferroni corrected 95% upper  
532 bounds estimated for each module chromosome pairing based on 25,000 randomizations. **b**,  
533 Distribution of continuous membership in module E across the module assigned transcriptome  
534 (Pearson  $r$  to MEG-E: E) with sex chromosomes separated.

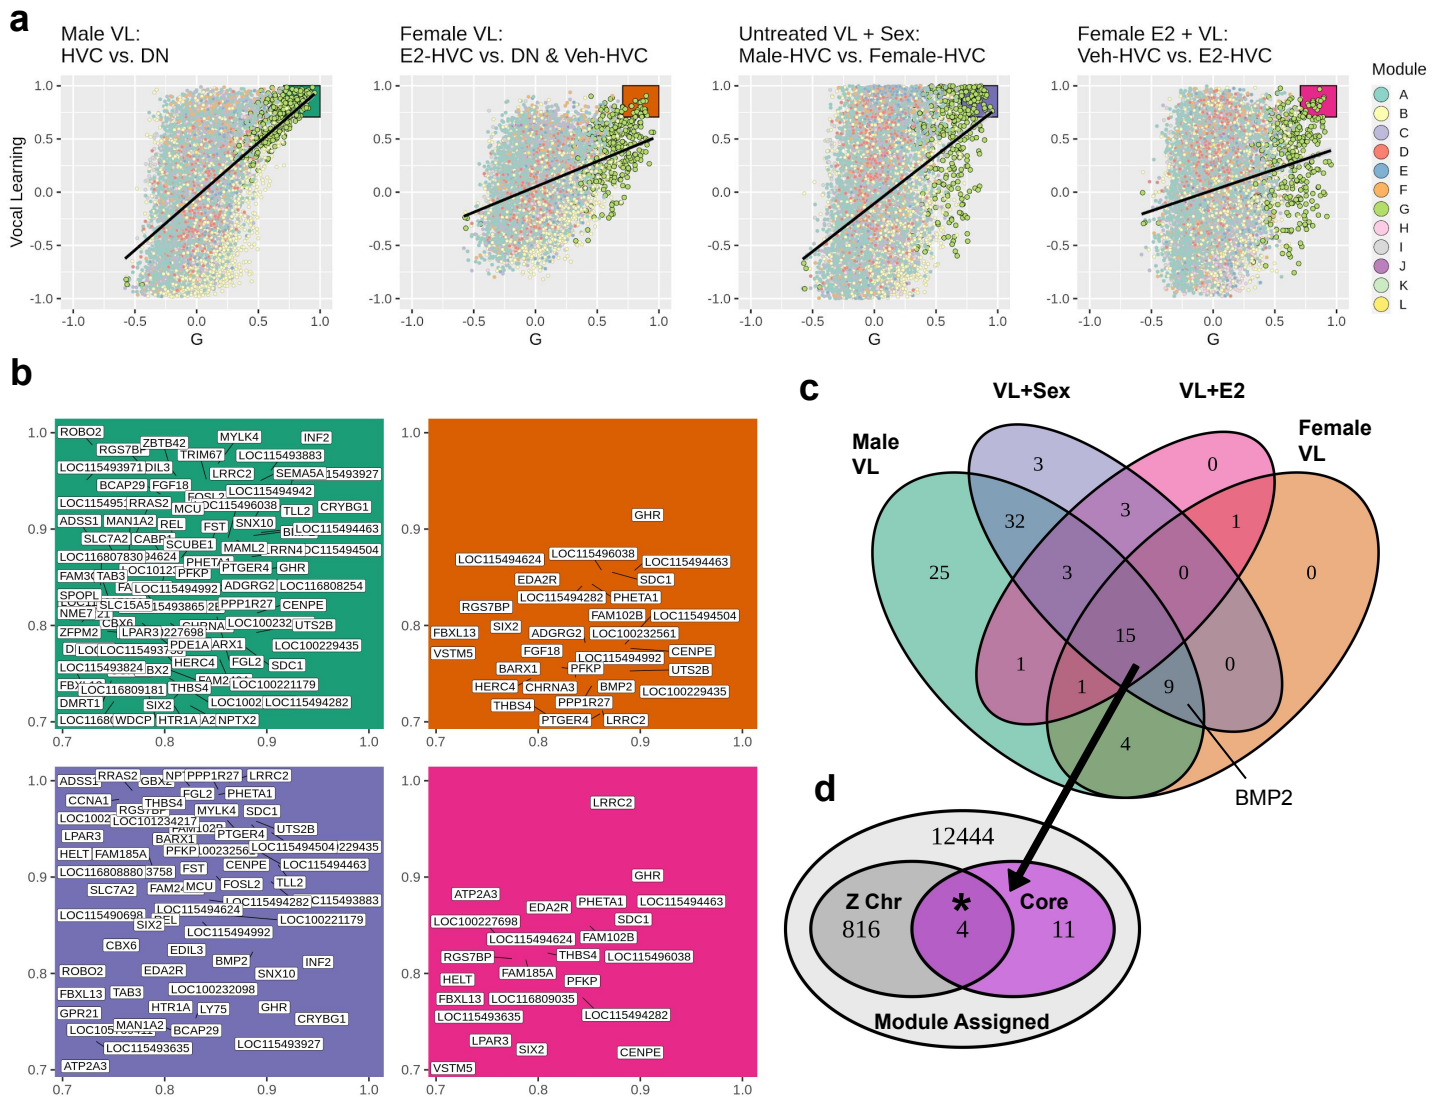

535 **Figure 4 - Identification of core genes and association to the Z chromosome.** **a**, Single gene  
 536 continuous membership in module G (x-axis; Pearson r to MEG from module G) for all assigned  
 537 genes vs correlation to vocal learning in masculine or masculinized HVC relative to samples from  
 538 non-vocal learning females in each of the four comparisons (titles). Shaded area indicates gene of  
 539 interest criteria for each comparison. **b**, Blowup of shaded regions in **a** showing genes of interest  
 540 from each comparison. **c**, Identification of core genes by intersecting the four gene sets of interest. **d**,  
 541 Enrichment of Z chromosome transcripts within the core genes. \* indicates  $p < 0.05$  by an  
 542 upper-tailed hypergeometric test.



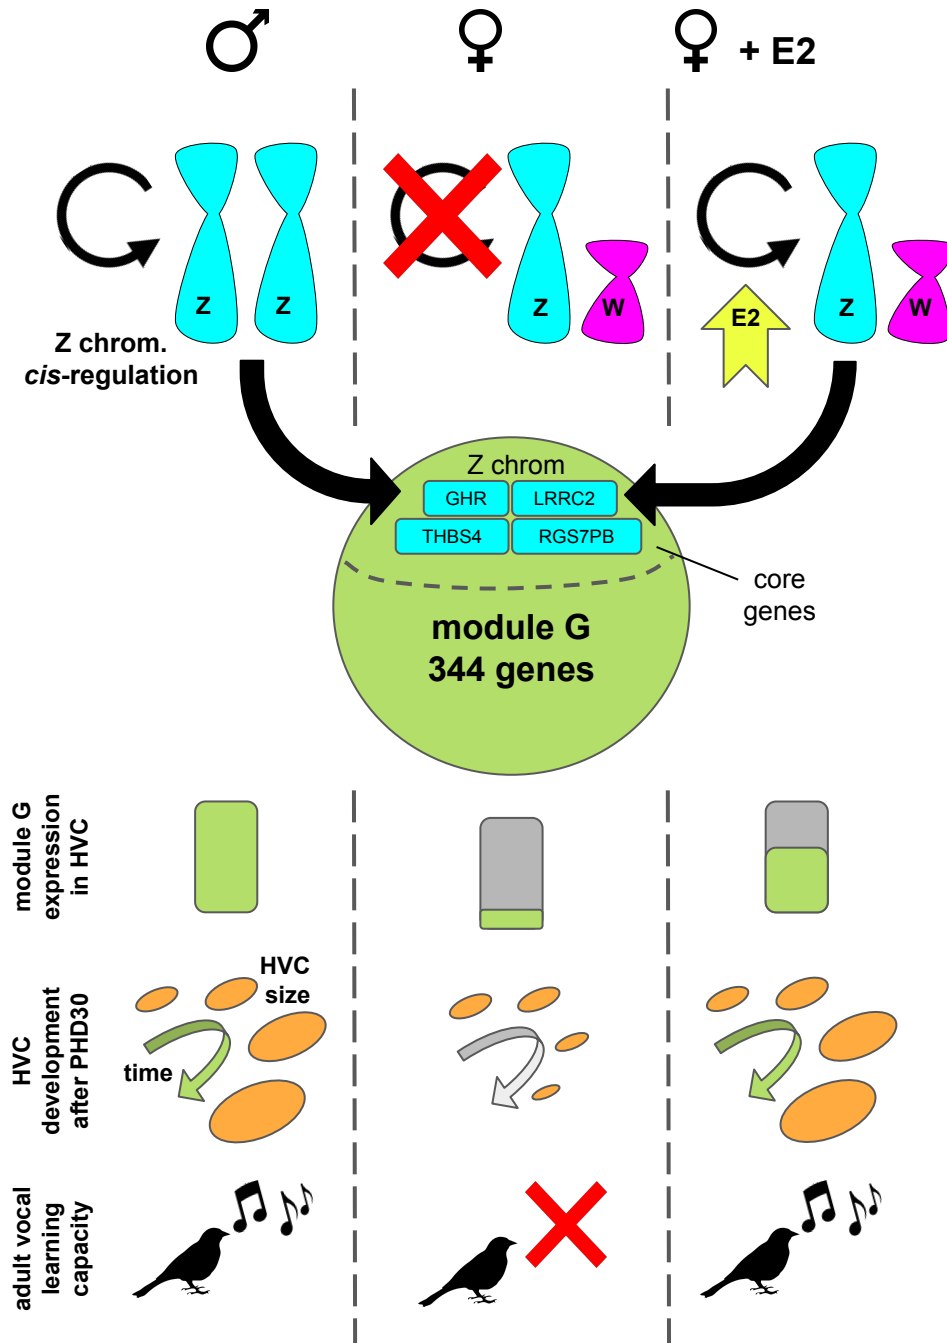

543 **Figure 5 - Z chromosome *cis*-regulatory hypothesis of sexually dimorphic zebra finch vocal**  
 544 **learning.** We propose that estradiol treatment in female zebra finches masculinizes song behavior  
 545 by overcoming insufficient Z sex chromosome dosage to activate a Z chromosome *cis*-acting  
 546 regulator in HVC which would otherwise be male specific. The genes controlled by this putative  
 547 *cis*-acting element are drivers of a larger proliferative genetic program which prevents HVC atrophy  
 548 and allows for its expansion late in development, sufficient for rudimentary vocal learning in females.

## Module G: Significantly Enriched GO

| GOterm                                                                   | GOid       | p     |
|--------------------------------------------------------------------------|------------|-------|
| DNA-binding transcription factor activity, RNA polymerase II-specific    | GO:0000981 | 0.012 |
| cell differentiation                                                     | GO:0030154 | 0.013 |
| DNA-binding transcription factor activity                                | GO:0003700 | 0.015 |
| extracellular matrix structural constituent                              | GO:0005201 | 0.024 |
| inflammatory response                                                    | GO:0006954 | 0.026 |
| anatomical structure morphogenesis                                       | GO:0009653 | 0.03  |
| external side of plasma membrane                                         | GO:0009897 | 0.036 |
| extracellular space                                                      | GO:0005615 | 0.037 |
| DNA-binding transcription activator activity, RNA polymerase II-specific | GO:0001228 | 0.04  |
| cell-cell signaling                                                      | GO:0007267 | 0.041 |
| positive regulation of multicellular organism growth                     | GO:0040018 | 0.042 |
| transmembrane transporter activity                                       | GO:0022857 | 0.043 |

549 **Table 1 - Module G functional enrichment analysis.** Significantly enriched GO terms within the 1:1  
550 human orthologs of module G. Lists full GO term, GOid, and p value calculated by generally  
551 applicable gene set enrichment<sup>47</sup>.

### Module G: Core VL Genes

| Z Chromosome | Other        | cont.        |
|--------------|--------------|--------------|
| GHR          | CENPE        | LOC115494624 |
| LRRC2        | EDA2R        | PFKP         |
| RGS7BP       | FAM102B      | PHETA1       |
| THBS4        | FBXL13       | SDC1         |
|              | LOC115494282 | SIX2         |
|              | LOC115494463 |              |

552 **Table 2 - Core genes of module G specialization to vocal learning HVC.** Putative drivers of  
553 module G specialization to vocal learning capale HVC. Intersection of the four gene of interest sets  
554 (**Fig. 4b**), separating the significant enrichment of genes from the Z sex chromosome.

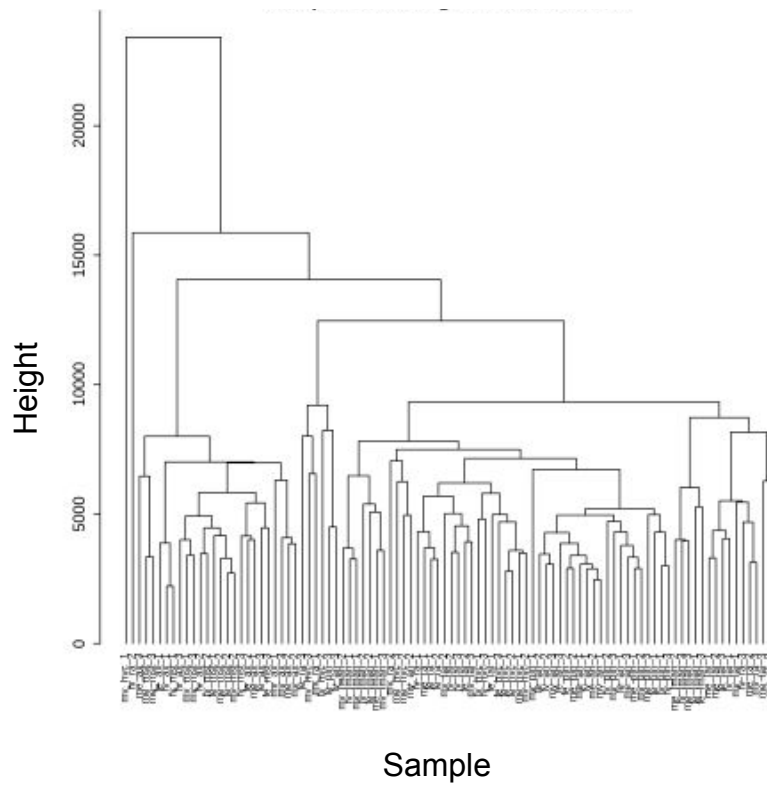

555 **Figure S1 - Outlier sample detection by hierarchical clustering.** Two samples (mv\_hvc\_1 and  
556 fe\_ra\_2, left most) form deep, single sample branches in the hierarchical clustering tree , indicative  
557 of outlier samples unlikely to fit the correlational structure of the larger dataset. Samples were  
558 removed prior to gene network construction and module detection.

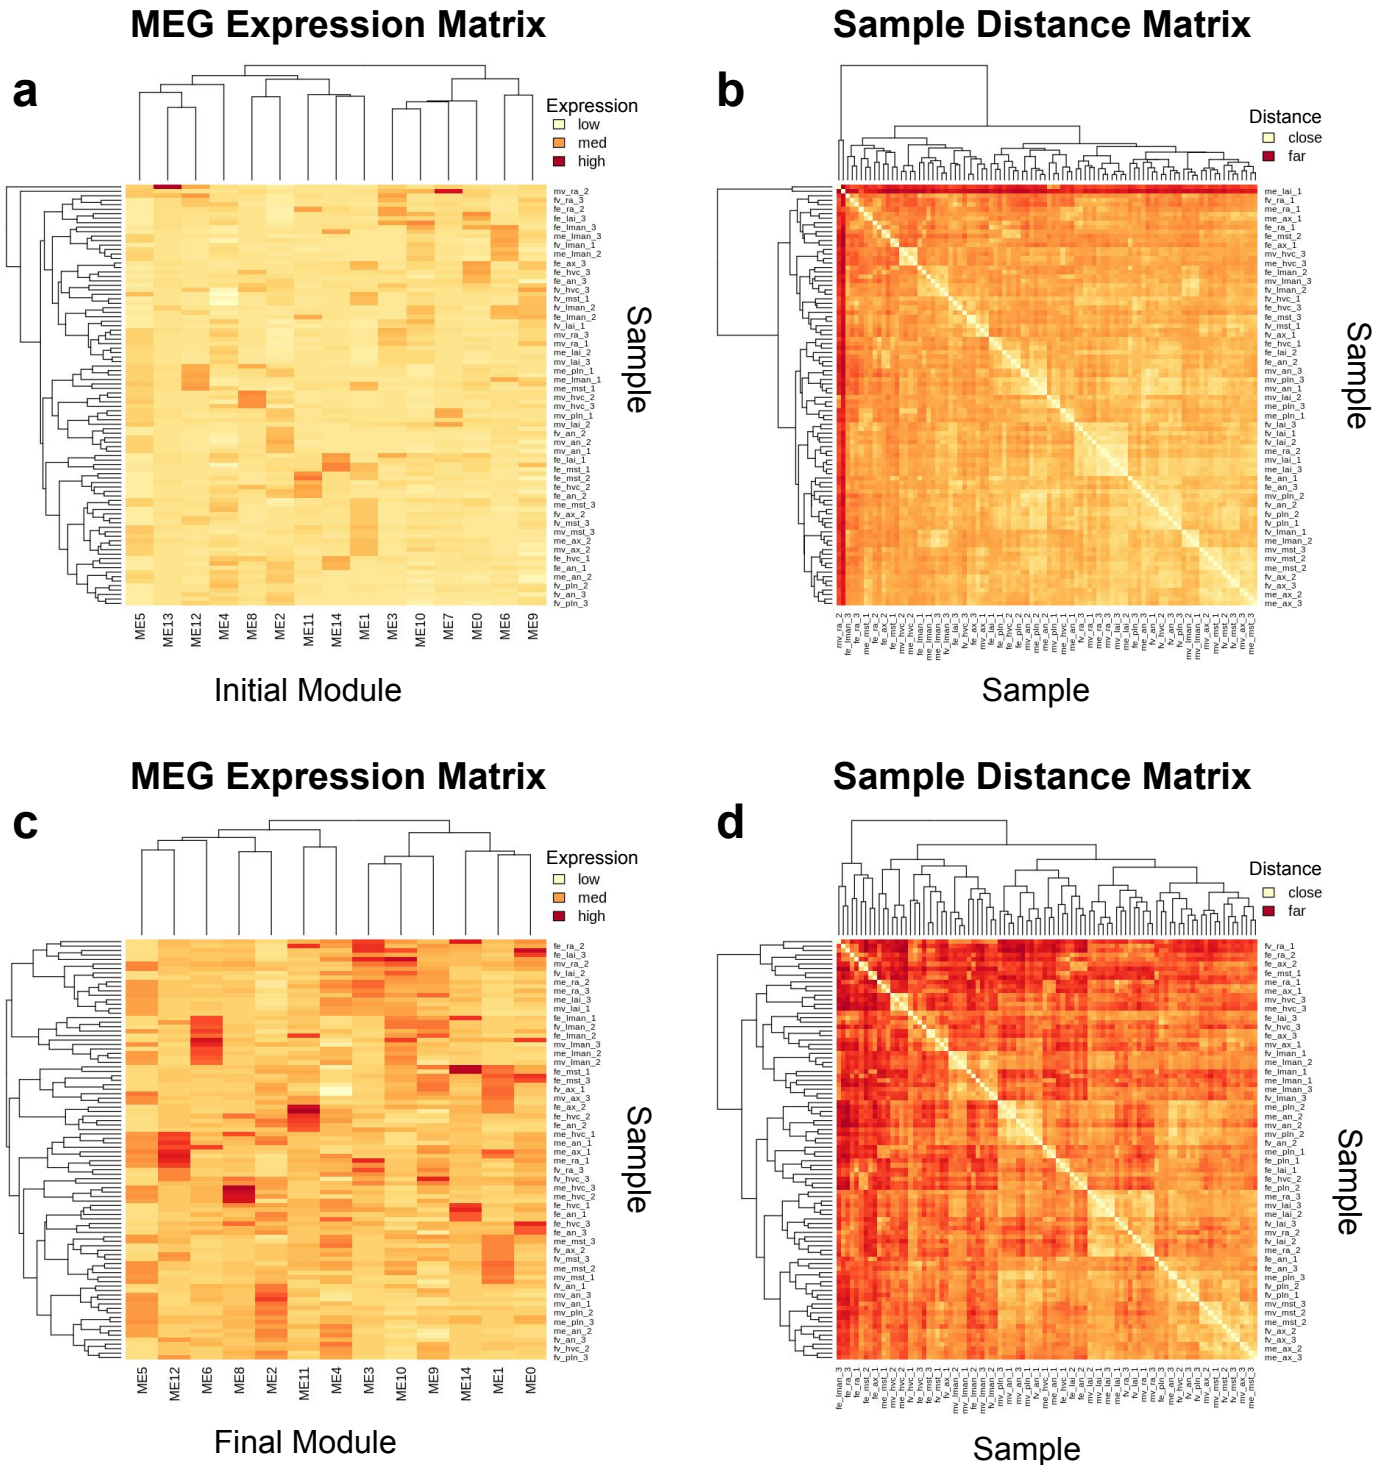

559 **Figure S2 - Initial module overfitting to single samples.** a, ME7 is highly expressed only in  
 560 mv\_ra\_2 and ME13 is highly expressed only in fv\_ra\_3. b, This overfitting causes these samples to  
 561 be deep outliers in the sample-sample distance matrix. c, Removing these module eigengenes from  
 562 the set prevents these samples from behaving as outliers in the distance matrix in d. These overfit  
 563 modules were removed prior to module lettering and statistical analysis.

## Z chromosome genes

Fold Male-Vehicle-HVC Expression

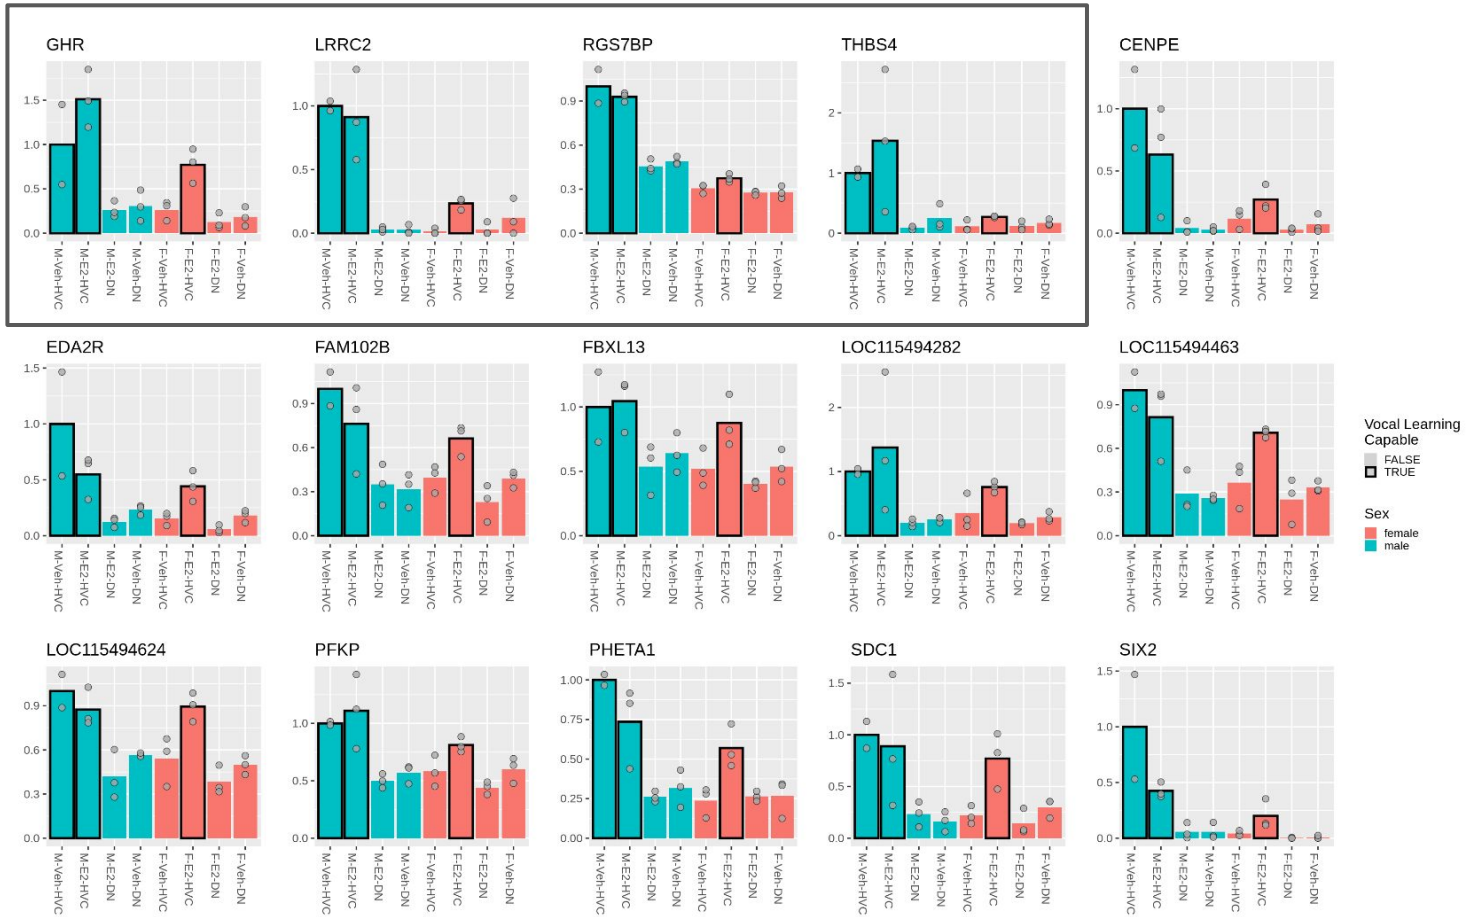

564 **Figure S3 - Expression of module G core genes in HVC and surrounding dorsal nidopallium.**  
 565 Each of the 15 core genes show reduced expression in female HVC relative to the male with an  
 566 increase in expression in response to E2 treatment. This transcriptional response to E2 is not seen in  
 567 the surrounding DN.

| Gene         | G    | Gene         | G    | Gene         | G    | Gene         | G    | Gene         | G    | Gene         | G     | Gene         | G    | Gene         | G    | Gene | G | Gene | G | Gene | G |
|--------------|------|--------------|------|--------------|------|--------------|------|--------------|------|--------------|-------|--------------|------|--------------|------|------|---|------|---|------|---|
| CRYBG1       | 0.96 | EDA2R        | 0.81 | LOC105759411 | 0.74 | LOC115491275 | 0.68 | TWIST1       | 0.64 | LOC115490816 | 0.58  | ATG3         | 0.51 | LOC116808453 | 0.43 |      |   |      |   |      |   |
| INF2         | 0.94 | LOC115494624 | 0.81 | LOC116807830 | 0.74 | CCBE1        | 0.68 | OPN4         | 0.63 | SLC25A4      | 0.57  | COG5         | 0.51 | CDT1         | 0.43 |      |   |      |   |      |   |
| LOC115493927 | 0.92 | THBS4        | 0.81 | LOC115490698 | 0.74 | MPP5         | 0.68 | LOC115491180 | 0.63 | IGF2         | 0.57  | GRB2         | 0.51 | LOC115496033 | 0.43 |      |   |      |   |      |   |
| TLL2         | 0.91 | REL          | 0.81 | LOC115493635 | 0.73 | SLC16A3      | 0.68 | TMEM201      | 0.63 | SLIT3        | -0.57 | LOC115493910 | 0.50 | INSVNB       | 0.43 |      |   |      |   |      |   |
| LOC100229435 | 0.90 | LOC115493865 | 0.81 | ADSS1        | 0.73 | LOC116807734 | 0.68 | TTC28        | 0.63 | LOC100220690 | 0.57  | LOC100223718 | 0.50 | LOC100222957 | 0.43 |      |   |      |   |      |   |
| LOC115493883 | 0.90 | ZBTB42       | 0.81 | LOC100219000 | 0.73 | SLC13A1      | 0.68 | LOC116808070 | 0.63 | LOC115497877 | 0.57  | SLC25A48     | 0.50 | LOC116809294 | 0.42 |      |   |      |   |      |   |
| GHR          | 0.90 | BARX1        | 0.81 | ROBO2        | 0.73 | SLC13A1      | 0.68 | CDCP2        | 0.63 | GFRAL1       | 0.57  | ACSF2        | 0.50 | LOC116806919 | 0.41 |      |   |      |   |      |   |
| SNX10        | 0.89 | LOC100232098 | 0.81 | VSTM5        | 0.73 | SNTG1        | 0.68 | ONECTD1      | 0.63 | TNKS         | 0.57  | ACSF2        | 0.50 | LOC116807261 | 0.41 |      |   |      |   |      |   |
| LOC115494463 | 0.89 | FAM240A      | 0.80 | LOC115493971 | 0.72 | LOC115491133 | 0.68 | LOC100220758 | 0.63 | CH25H        | 0.56  | WT1          | 0.49 | LOC100220760 | 0.41 |      |   |      |   |      |   |
| SEMASA       | 0.89 | LOC115491108 | 0.80 | SPOP1        | 0.72 | TMSB15B      | 0.67 | IL1R1        | 0.63 | WWC2         | 0.56  | LOC115495752 | 0.49 | LOC116807756 | 0.40 |      |   |      |   |      |   |
| CENPE        | 0.89 | CABP1        | 0.80 | LOC116807829 | 0.72 | AR           | 0.67 | LOC116808082 | 0.63 | LOC116809281 | 0.56  | GABRB1       | 0.49 | TRNAC-GCA_8  | 0.40 |      |   |      |   |      |   |
| UTS2B        | 0.89 | BCAP29       | 0.80 | DNAH10       | 0.72 | LOC116808110 | 0.67 | YEATS4       | 0.62 | BBS5         | 0.56  | SEPTIN3      | 0.49 | TGIF1        | 0.40 |      |   |      |   |      |   |
| BMP2         | 0.89 | LOC101234217 | 0.80 | HELT         | 0.71 | POU1F1       | 0.66 | HPR11        | 0.62 | MCM10        | 0.56  | FLNC         | 0.49 | SHMT1        | 0.40 |      |   |      |   |      |   |
| LOC115494504 | 0.88 | HERC4        | 0.79 | NME7         | 0.71 | LGMN         | 0.66 | LOC101233072 | 0.62 | TSC22D1      | 0.56  | LOC115494122 | 0.48 | MYPN         | 0.40 |      |   |      |   |      |   |
| SDC1         | 0.87 | LOC115493758 | 0.79 | PDE9A        | 0.71 | RSP04        | 0.66 | DIO3         | 0.62 | LOC116808493 | 0.56  | SCGN         | 0.48 | SFRP4        | 0.40 |      |   |      |   |      |   |
| LOC115494463 | 0.87 | FAM185A      | 0.79 | FBX13        | 0.71 | LOC100221042 | 0.66 | LOC116807890 | 0.62 | AZIN1        | 0.55  | LOC115495359 | 0.48 | LOC116808124 | 0.39 |      |   |      |   |      |   |
| LOC100232561 | 0.87 | HTR1A        | 0.78 | LOC116808880 | 0.71 | LOC100222749 | 0.66 | LOC115491135 | 0.62 | MARK1        | -0.55 | LOC115495608 | 0.48 | MIR2984      | 0.39 |      |   |      |   |      |   |
| LRRC2        | 0.86 | GBX2         | 0.78 | ACS11        | 0.71 | TACC2        | 0.66 | LOC115496139 | 0.62 | TOM1         | 0.55  | CDYL         | 0.47 | LOC115497917 | 0.39 |      |   |      |   |      |   |
| LOC115496038 | 0.86 | SIX2         | 0.78 | PTX3         | 0.71 | LOC115495472 | 0.66 | TNFRSF13C    | 0.62 | GMD5         | 0.55  | LOC100222730 | 0.47 | HOXA11       | 0.38 |      |   |      |   |      |   |
| PTGER4       | 0.86 | PDE1A        | 0.78 | LOC100228395 | 0.71 | MUC2         | 0.65 | ATP11B       | 0.62 | ACKR3        | 0.55  | LOC100220430 | 0.47 | LOC115493492 | 0.38 |      |   |      |   |      |   |
| MAM12        | 0.85 | LOC116809181 | 0.78 | LOC100222099 | 0.70 | LOC115496281 | 0.65 | LOC116806804 | 0.61 | FAM110A      | 0.55  | TPPP3        | 0.47 | LOC116808892 | 0.38 |      |   |      |   |      |   |
| LOC100221179 | 0.85 | RG57BP       | 0.77 | LOC115495208 | 0.70 | LOC105758841 | 0.65 | LOC115494933 | 0.61 | LOC116807701 | 0.54  | LOC100218771 | 0.47 | MMRN2        | 0.37 |      |   |      |   |      |   |
| LOC115494942 | 0.85 | SLC15A5      | 0.77 | TMC5         | 0.70 | CHRNAS       | 0.65 | ASB15        | 0.61 | LOC116808425 | 0.54  | LOC115496073 | 0.46 | LOC100223936 | 0.37 |      |   |      |   |      |   |
| LOC116808254 | 0.85 | RRA52        | 0.77 | LOC116808614 | 0.70 | DSG2         | 0.65 | FOXO3        | 0.61 | NIF3L1       | 0.54  | LOC100218321 | 0.46 | ZNF367       | 0.37 |      |   |      |   |      |   |
| LOC115494282 | 0.84 | CBX6         | 0.77 | LOC115493739 | 0.70 | NEK10        | 0.65 | LOC100189947 | 0.61 | CHRNE2       | 0.54  | LOC100227844 | 0.46 | LOC115491274 | 0.37 |      |   |      |   |      |   |
| MCU          | 0.84 | LOC100227698 | 0.77 | LOC100232469 | 0.70 | ST6GAL2      | 0.65 | LOC116808684 | 0.61 | PITX3        | 0.54  | NME2         | 0.46 | ACOT11       | 0.36 |      |   |      |   |      |   |
| TRIM67       | 0.84 | LOC115493751 | 0.75 | SLC35C2      | 0.70 | DAPL1        | 0.65 | EIF4E3       | 0.61 | MFAP4        | 0.54  | LOC115491148 | 0.46 | BHLHA15      | 0.36 |      |   |      |   |      |   |
| LOC115494992 | 0.84 | LOC100223270 | 0.75 | FEAR4        | 0.69 | ARHGAP24     | 0.64 | LOC100225408 | 0.59 | FOXJ3        | 0.52  | LOC115492560 | 0.45 | WVA3B        | 0.34 |      |   |      |   |      |   |
| LY75         | 0.83 | LOC115495199 | 0.75 | CPA6         | 0.69 | HMMR         | 0.64 | LOC115495471 | 0.59 | ASB10        | 0.52  | BRCA1        | 0.45 | MIR204-2     | 0.33 |      |   |      |   |      |   |
| FGF18        | 0.83 | LOC116809035 | 0.75 | LOC116809117 | 0.69 | DIPK1A       | 0.64 | LOC116807851 | 0.58 | LOC115496648 | 0.52  | MAP2         | 0.44 | HPD          | 0.32 |      |   |      |   |      |   |
| NPTX2        | 0.82 | DMRT1        | 0.75 | LOC116809117 | 0.69 | HMMR         | 0.64 | LOC116807851 | 0.58 | LOC115496648 | 0.52  | MAP2         | 0.44 | LOC115491248 | 0.32 |      |   |      |   |      |   |
| PFKFB        | 0.82 | FAM3C        | 0.74 | CCDC146      | 0.69 | TRNAU1AP     | 0.64 | LOC100230156 | 0.58 | PGM3         | 0.52  | FOSB         | 0.44 | LOC101233536 | 0.32 |      |   |      |   |      |   |
| CHRNAS       | 0.82 | LOC115493824 | 0.74 | GPR155       | 0.69 | PDE8B        | 0.64 | LOC115493350 | 0.58 | ITGA9        | 0.52  | TTK          | 0.44 | PLA2G4E      | 0.31 |      |   |      |   |      |   |
| SCUBE1       | 0.82 | LPAR3        | 0.74 | LOC100227652 | 0.68 | LOC115493570 | 0.64 | HTR1F        | 0.58 | LOC115494131 | 0.52  | LOC105758677 | 0.44 | LOC115492139 | 0.31 |      |   |      |   |      |   |
| EDIL3        | 0.81 | GPR21        | 0.74 | NFKB1Z       | 0.68 | HEY1         | 0.64 | MUSTN1       | 0.58 | POT1         | 0.51  | TK1          | 0.43 | PRDM13       | 0.31 |      |   |      |   |      |   |

568 **Table S1- ModuleG constituent genes.** Lists all genes assigned to module G by and their  
569 continuous membership in module G (Pearson r to MEG from moduleG)
