# Supplementary material for: Sex chromosome gene expression associated with vocal learning following hormonal manipulation in female zebra finches
Source: bioRxiv preprint, doi:10.1101/2021.07.12.452102, version 3 (2024-10-28)
Supplement: supplemental_hvc_specializations [file 452102_file06.xlsx]

## Sheet: male_vl_suppl
	cor	p	Z	t	nObs	gene_id	q	me_assigned	module	membership
1	0.803465	0.00289061	3.32494	4.04869	11	A1CF	0.0500814	X	G	0.128427
2	0.518901	0.101932	1.7245	1.82106	11	A2M	0.393166	X	G	-0.0520214
3	-0.0372047	0.913519	-0.111666	0.111692	11	A4GNT	0.969613	J	G	0.10048
4	-0.147276	0.665647	-0.445065	0.4467	11	AAAS	0.870108	D	G	-0.0767147
5	0.318495	0.339796	0.989914	1.00798	11	AACS	0.672388	A	G	0.274721
6	-0.19356	0.568504	-0.588098	0.591872	11	AADAC	0.819512	X	G	0.108282
7	-0.0329253	0.92344	-0.0988116	0.0988295	11	AADAT	0.972947	A	G	0.0191371
8	-0.662688	0.0262748	-2.39277	2.65466	11	AAGAB	0.184217	C	G	-0.286006
9	0.732602	0.0103401	2.80296	3.22895	11	AAK1	0.106172	A	G	0.541977
10	0.512638	0.106871	1.69891	1.79118	11	AAMDC	0.401292	B	G	-0.119138
11	-0.50223	0.11542	-1.65685	1.74237	11	AAMP	0.416049	A	G	-0.22531
12	0.169322	0.618689	0.512905	0.515407	11	AANAT	0.845071	X	G	0.0804673
13	-0.181051	0.594204	-0.549207	0.55228	11	AAR2	0.831977	A	G	0.312057
14	0.621477	0.0412394	2.18223	2.37983	11	AARS1	0.23937	A	G	0.00344072
15	-0.161389	0.635449	-0.488439	0.490599	11	AARS2	0.85342	X	G	-0.0906305
16	0.377401	0.252525	1.19108	1.22262	11	AASDH	0.603174	A	G	-0.148327
17	-0.00753333	0.982462	-0.0226004	0.0226006	11	AASDHPPT	0.995224	D	G	-0.109198
18	-0.179843	0.596709	-0.545461	0.548472	11	AASS	0.833643	X	G	0.0502014
19	-0.197153	0.561203	-0.599307	0.603301	11	AATF	0.815355	A	G	-0.271955
20	-0.024754	0.942409	-0.0742773	0.0742848	11	AATK	0.980287	B	G	-0.0907826
21	-0.19221	0.571256	-0.583892	0.587586	11	ABAT	0.820597	A	G	-0.287355
22	-0.195494	0.564569	-0.59413	0.598021	11	ABCA1	0.817353	A	G	-0.100629
23	-0.019965	0.953539	-0.0599029	0.0599069	11	ABCA12	0.984056	X	G	-0.0949454
24	0.258774	0.44228	0.794383	0.803699	11	ABCA13	0.735245	F	G	-0.0375708
25	0.429798	0.187054	1.37895	1.42802	11	ABCA2	0.526764	D	G	0.0129349
26	-0.378873	0.250528	-1.19623	1.22818	11	ABCA3	0.600343	A	G	-0.140886
27	0.541132	0.0856094	1.81726	1.93046	11	ABCA4	0.359056	A	G	-0.0121087
28	0.720659	0.0123498	2.72704	3.11843	11	ABCA5	0.1179	B	G	0.099596
29	0.413625	0.206028	1.31993	1.36293	11	ABCA7	0.548595	B	G	-0.00474567
30	0.0323887	0.924684	0.0972002	0.0972172	11	ABCB1	0.973267	X	G	-0.230712
31	0.0264452	0.93848	0.0793542	0.0793634	11	ABCB10	0.978469	D	G	0.15171
32	0.889799	0.000243939	4.26287	5.84941	11	ABCB11	0.0123287	F	G	0.511437
33	0.282488	0.399978	0.871153	0.883447	11	ABCB5	0.704109	X	G	0.0951411
34	0.407333	0.213707	1.29723	1.33804	11	ABCB6	0.55813	D	G	0.0983547
35	-0.713459	0.0136898	-2.68258	3.05464	11	ABCB7	0.12551	A	G	-0.234906
36	-0.0786345	0.818237	-0.236391	0.236636	11	ABCB8	0.936528	D	G	-0.0082112
37	-0.134051	0.694357	-0.404588	0.405815	11	ABCB9	0.883679	A	G	-0.0698881
38	-0.449112	0.165834	-1.45076	1.50797	11	ABCC10	0.498245	A	G	-0.211093
39	-0.00122183	0.997155	-0.0036655	0.0036655	11	ABCC2	0.999341	A	G	-0.0788967
40	-0.500583	0.116812	-1.65025	1.73474	11	ABCC3	0.418197	C	G	-0.16822
41	0.73601	0.00981312	2.82515	3.26163	11	ABCC4	0.102222	C	G	0.341055
42	0.446202	0.168931	1.43984	1.49576	11	ABCC5	0.503042	D	G	0.0545772
43	0.722991	0.0119368	2.74165	3.13954	11	ABCC8	0.115771	C	G	0.0703036
44	0.546978	0.0816245	1.84218	1.96015	11	ABCC9	0.349931	C	G	-0.101405
45	0.890706	0.000235347	4.276	5.87822	11	ABCD2	0.0121004	X	G	0.0539976
46	-0.240562	0.476128	-0.73611	0.743519	11	ABCD3	0.760729	B	G	-0.122601
47	0.157806	0.64307	0.477409	0.479427	11	ABCD4	0.858124	A	G	0.0405186
48	0.500594	0.116803	1.65029	1.73479	11	ABCE1	0.418197	X	G	0.401898
49	0.192385	0.570898	0.584439	0.588143	11	ABCF1	0.820446	B	G	-0.0404871
50	-0.157031	0.644723	-0.475025	0.477012	11	ABCF2	0.858915	I	G	-0.157804
51	0.187684	0.580522	0.569806	0.573238	11	ABCG1	0.824486	A	G	-0.16337
52	0.311755	0.350678	0.967464	0.984321	11	ABCG2	0.681363	A	G	0.034274
53	-0.41411	0.205443	-1.32169	1.36486	11	ABCG4	0.547831	D	G	-0.295046
54	-0.0423582	0.901587	-0.127151	0.127189	11	ABCG5	0.965076	A	G	-0.0262509
55	0.477787	0.13719	1.56034	1.63165	11	ABCG8	0.453429	A	G	0.114304
56	0.124713	0.714851	0.376096	0.377082	11	ABHD10	0.894175	B	G	-0.135572
57	0.668508	0.0245272	2.42412	2.69667	11	ABHD11	0.177878	B	G	0.24342
58	0.580626	0.0610756	1.99022	2.13945	11	ABHD12	0.298405	B	G	-0.180517
59	0.291271	0.384839	0.899863	0.913417	11	ABHD12B	0.695297	A	G	0.0531173
60	-0.207276	0.54084	-0.630969	0.635631	11	ABHD13	0.803671	D	G	0.0531348
61	0.0115552	0.973101	0.0346673	0.034668	11	ABHD14A	0.991487	X	G	-0.0154077
62	0.131883	0.699099	0.397966	0.399134	11	ABHD14B	0.886657	X	G	-0.0200421
63	-0.573225	0.0652553	-1.95694	2.0987	11	ABHD15	0.309651	X	G	0.00739078
64	-0.511884	0.107476	-1.69584	1.78761	11	ABHD17A	0.402736	D	G	0.0127765
65	0.579029	0.061962	1.983	2.13059	11	ABHD17B	0.301268	E	G	0.249788
66	-0.521151	0.100195	-1.73375	1.83189	11	ABHD17C	0.390131	A	G	-0.304179
67	-0.064554	0.850433	-0.193932	0.194067	11	ABHD18	0.949802	D	G	-0.082994
68	-0.0597673	0.861427	-0.179516	0.179623	11	ABHD2	0.952826	A	G	-0.194455
69	-0.296509	0.37595	-0.917062	0.931412	11	ABHD5	0.695297	B	G	0.154167
70	-0.874225	0.000432002	-4.05218	5.40178	11	ABHD6	0.0167272	B	G	-0.211972
71	-0.0168713	0.960733	-0.0506187	0.0506211	11	ABHD8	0.98708	D	G	0.0843732
72	-0.435018	0.181164	-1.39821	1.44938	11	ABI1	0.519854	B	G	0.168435
73	-0.380762	0.247979	-1.20285	1.23534	11	ABI2	0.597448	B	G	0.0832245
74	-0.0410488	0.904617	-0.123216	0.12325	11	ABI3	0.966113	X	G	0.0393666
75	-0.191062	0.573601	-0.580317	0.583943	11	ABI3BP	0.821334	I	G	-0.127943
76	-0.518801	0.10201	-1.72409	1.82058	11	ABITRAM	0.393166	A	G	-0.165405
77	-0.466947	0.14762	-1.51848	1.58415	11	ABL1	0.470925	X	G	-0.0359171
78	-0.447048	0.168027	-1.44301	1.49931	11	ABL2	0.501315	C	G	-0.0907756
79	0.192341	0.570988	0.584302	0.588003	11	ABLIM1	0.820446	A	G	-0.152278
80	0.0833486	0.807512	0.250627	0.250919	11	ABLIM2	0.932816	B	G	0.537537
81	0.678029	0.0218486	2.47637	2.76733	11	ABLIM3	0.165781	D	G	0.245956
82	-0.254455	0.450202	-0.780513	0.789348	11	ABR	0.741341	A	G	0.265228
83	0.123257	0.71806	0.371662	0.372613	11	ABRA	0.895571	X	G	0.27139
84	0.557607	0.0746997	1.88806	2.01519	11	ABRACL	0.333833	A	G	-0.0223059
85	0.18366	0.588807	0.557304	0.560515	11	ABRAXAS1	0.829249	A	G	-0.00259427
86	0.4833	0.13207	1.58184	1.65617	11	ABRAXAS2	0.444975	A	G	-0.0423865
87	0.141929	0.67721	0.42868	0.43014	11	ABT1	0.875398	B	G	0.18594
88	-0.0533488	0.876204	-0.160199	0.160275	11	ABTB1	0.957196	B	G	-0.233834
89	0.438529	0.177268	1.41122	1.46385	11	ABTB2	0.515504	A	G	-0.230669
90	-0.0518883	0.879572	-0.155805	0.155875	11	ACAA1	0.957645	X	G	0.103562
91	0.138612	0.684412	0.418532	0.419891	11	ACAA2	0.878891	E	G	0.084749
92	0.105733	0.757016	0.318388	0.318986	11	ACACA	0.91171	A	G	-0.292758
93	-0.423897	0.193849	-1.3573	1.40408	11	ACACB	0.534475	X	G	0.0411979
94	0.541596	0.0852885	1.81923	1.9328	11	ACAD10	0.358608	X	G	-0.136266
95	0.00658286	0.984675	0.0197489	0.019749	11	ACAD11	0.996095	L	G	0.0851409
96	0.313484	0.347869	0.973213	0.990373	11	ACAD8	0.679556	X	G	0.172735
97	-0.04304	0.90001	-0.1292	0.12924	11	ACAD9	0.964844	X	G	0.0366082
98	0.279972	0.404368	0.862956	0.874906	11	ACADL	0.707538	X	G	-0.121478
99	0.665552	0.025404	2.40815	2.67522	11	ACADM	0.180822	A	G	-0.244502
100	0.582541	0.0600249	1.9989	2.15012	11	ACADS	0.295644	X	G	0.0881301
101	-0.627781	0.0386401	-2.21323	2.41953	11	ACADSB	0.230364	X	G	-0.155616
102	0.779996	0.00463056	3.13608	3.73929	11	ACAN	0.065906	X	G	0.376322
103	0.296039	0.376744	0.915516	0.929793	11	ACAP2	0.695297	C	G	0.0400078
104	-0.596983	0.0524908	-2.06534	2.2324	11	ACAP3	0.275248	B	G	0.089248
105	0.451478	0.163342	1.45967	1.51794	11	ACAT1	0.495494	E	G	0.0949666
106	0.769039	0.0056649	3.05391	3.60937	11	ACAT2	0.073706	D	G	0.224769
107	-0.00641724	0.98506	-0.019252	0.0192521	11	ACBD3	0.996095	A	G	-0.291861
108	0.212002	0.531438	0.645799	0.650799	11	ACBD4	0.799072	D	G	-0.00431032
109	0.174996	0.606798	0.530447	0.533216	11	ACBD5	0.838999	A	G	-0.261246
110	-0.0640155	0.851669	-0.19231	0.192441	11	ACBD6	0.949969	X	G	-0.173212
111	0.765954	0.00598441	3.03139	3.57424	11	ACBD7	0.0760432	B	G	-0.111234
112	-0.203433	0.548534	-0.618934	0.623334	11	ACCS	0.807447	A	G	0.0463492
113	0.742418	0.0088754	2.86754	3.32458	11	ACE	0.0958801	X	G	0.606508
114	0.103774	0.761404	0.312447	0.313012	11	ACE2	0.914202	C	G	-0.0809607
115	-0.402244	0.220041	-1.27897	1.31807	11	ACER1	0.56489	X	G	-0.0870259
116	-0.601008	0.0505125	-2.08417	2.25592	11	ACER2	0.269633	E	G	0.00793554
117	-0.452397	0.16238	-1.46313	1.52183	11	ACER3	0.494072	X	G	-0.0277634
118	-0.139963	0.681476	-0.422663	0.424063	11	ACKR2	0.877754	X	G	-0.0148469
119	0.684811	0.0200721	2.51435	2.81923	11	ACKR3	0.158324	G	G	0.547773
120	0.506208	0.112102	1.67286	1.76091	11	ACKR4	0.410062	A	G	0.0927895
121	0.364083	0.271005	1.14475	1.17274	11	ACLY	0.622337	A	G	-0.000570149
122	-0.0885224	0.795774	-0.266264	0.266614	11	ACMSD	0.928041	A	G	0.0943829
123	0.246492	0.464981	0.755023	0.763019	11	ACO1	0.752582	E	G	0.0579142
124	0.163773	0.630397	0.495783	0.498043	11	ACO2	0.850807	D	G	-0.229028
125	0.376927	0.253171	1.18942	1.22082	11	ACOD1	0.604004	A	G	-0.174641
126	0.322055	0.334121	1.00182	1.02054	11	ACOT11	0.666675	G	G	0.361692
127	0.597933	0.0520192	2.06977	2.23792	11	ACOT12	0.273846	E	G	0.00421618
128	0.217705	0.520184	0.663738	0.669166	11	ACOT13	0.790832	X	G	0.0652142
129	0.853022	0.000843439	3.80144	4.90361	11	ACOT7	0.0243761	A	G	0.114354
130	0.815918	0.00219481	3.43344	4.23363	11	ACOT8	0.0424914	X	G	0.0442504
131	-0.0885096	0.795804	-0.266225	0.266575	11	ACOT9	0.928041	D	G	0.283906
132	-0.147877	0.664352	-0.446908	0.448563	11	ACOX1	0.869223	A	G	-0.20122
133	0.0970747	0.776457	0.292144	0.292606	11	ACOX2	0.920533	X	G	0.1242
134	-0.268247	0.425137	-0.824921	0.835355	11	ACOX3	0.722816	A	G	-0.0397452
135	0.0134082	0.968789	0.0402271	0.0402283	11	ACP1	0.990404	B	G	0.00190066
136	-0.259162	0.441573	-0.795628	0.804988	11	ACP2	0.734616	A	G	-0.0167031
137	-0.219352	0.516954	-0.668925	0.674481	11	ACP5	0.788844	X	G	-0.0685701
138	0.645691	0.0318793	2.30362	2.53677	11	ACP6	0.205973	A	G	0.407371
139	-0.257969	0.443752	-0.791795	0.80102	11	ACRBP	0.736094	E	G	-0.0871341
140	-0.149573	0.6607	-0.452112	0.453825	11	ACSBG1	0.867647	X	G	-0.0833171
141	0.491152	0.124989	1.61273	1.69154	11	ACSBG2	0.433327	A	G	0.169076
142	0.476817	0.138104	1.55657	1.62736	11	ACSF2	0.455478	G	G	0.497086
143	0.379001	0.250354	1.19668	1.22867	11	ACSF3	0.600153	X	G	0.136625
144	0.729026	0.0109149	2.77993	3.19521	11	ACSL1	0.109722	G	G	0.706277
145	0.148265	0.663517	0.448097	0.449765	11	ACSL3	0.868879	D	G	0.123574
146	-0.585054	0.0586639	-2.01034	2.16421	11	ACSL4	0.291868	B	G	0.12579
147	-0.211899	0.531642	-0.645476	0.650468	11	ACSL5	0.799072	X	G	-0.0750479
148	0.919207	6.30344e-05	4.75167	7.00306	11	ACSL6	0.00546382	B	G	0.12521
149	-0.483752	0.131655	-1.58361	1.65819	11	ACSS1	0.444187	A	G	-0.120752
150	0.381348	0.247191	1.20491	1.23756	11	ACSS2	0.597124	B	G	-0.139485
151	-0.212078	0.531288	-0.646038	0.651043	11	ACSS3	0.799056	X	G	0.248413
152	-0.331797	0.31885	-1.03454	1.05517	11	ACTA1	0.654723	X	G	-0.0752382
153	-0.316113	0.343621	-0.981969	0.999598	11	ACTA2	0.675653	X	G	-0.136568
154	0.734078	0.0101093	2.81254	3.24304	11	ACTB	0.104442	D	G	0.431596
155	0.338022	0.309293	1.05557	1.07749	11	ACTC1	0.646203	X	G	-0.0672488
156	0.426514	0.190818	1.36688	1.41467	11	ACTG1	0.531179	D	G	0.132206
157	-0.25951	0.440938	-0.796748	0.806148	11	ACTG2	0.7337	X	G	-0.090501
158	0.296579	0.375832	0.917292	0.931653	11	ACTL10	0.695297	A	G	0.109265
159	0.256866	0.445772	0.788251	0.797352	11	ACTL6A	0.737637	A	G	-0.0127594
160	-0.0127255	0.970378	-0.0381787	0.0381797	11	ACTL6B	0.990715	X	G	-0.0335255
161	-0.751802	0.00762258	-2.93126	3.42044	11	ACTN1	0.0865771	B	G	0.0316416
162	-0.249205	0.459922	-0.763694	0.771969	11	ACTN2	0.748248	X	G	-0.10745
163	-0.35966	0.277306	-1.12948	1.15636	11	ACTR10	0.627842	X	G	-0.0621853
164	0.0436205	0.898667	0.130945	0.130986	11	ACTR1A	0.96446	A	G	0.159201
165	-0.664395	0.0257534	-2.40192	2.66689	11	ACTR2	0.182341	B	G	0.0564766
166	-0.39749	0.226056	-1.26199	1.29954	11	ACTR3	0.570986	A	G	-0.216615
167	-0.481148	0.134053	-1.57343	1.64657	11	ACTR3B	0.44896	A	G	-0.277153
168	-0.431066	0.185612	-1.38362	1.43319	11	ACTR5	0.525624	A	G	-0.113491
169	-0.335653	0.312912	-1.04756	1.06897	11	ACTR6	0.64889	B	G	-0.125982
170	-0.551972	0.07832	-1.86364	1.98584	11	ACTR8	0.342703	B	G	-0.0633977
171	-0.836266	0.00133656	-3.62587	4.5754	11	ACVR1	0.0319678	B	G	0.134251
172	0.173637	0.609639	0.526242	0.528944	11	ACVR1B	0.840154	D	G	0.100244
173	0.113273	0.740188	0.341282	0.342019	11	ACVR1C	0.905798	X	G	-0.0884239
174	0.866233	0.000563199	3.95337	5.20114	11	ACVR2A	0.0191364	A	G	-0.225947
175	0.740903	0.00909097	2.85743	3.30951	11	ACVR2B	0.0976321	C	G	-0.0771887
176	0.102826	0.76353	0.309572	0.310122	11	ACVRL1	0.914928	D	G	-0.130916
177	0.430221	0.186572	1.3805	1.42974	11	ACYP1	0.526646	A	G	0.0555848
178	0.0741463	0.828475	0.222848	0.223053	11	ACYP2	0.941459	A	G	-0.232302
179	-0.0867429	0.799807	-0.260884	0.261213	11	ADA	0.92909	X	G	-0.0435261
180	0.462334	0.152205	1.50083	1.56422	11	ADA2	0.478341	A	G	-0.098288
181	0.152925	0.653503	0.462403	0.464236	11	ADAD1	0.865088	X	G	-0.0745403
182	0.295859	0.377046	0.914927	0.929176	11	ADAL	0.695297	X	G	0.14372
183	0.426726	0.190573	1.36766	1.41553	11	ADAM10	0.530718	A	G	0.194834
184	-0.0899381	0.792569	-0.270545	0.270912	11	ADAM12	0.926567	X	G	0.0899182
185	-0.471562	0.143121	-1.53623	1.60425	11	ADAM15	0.463812	D	G	-0.140464
186	-0.598574	0.0517029	-2.07276	2.24166	11	ADAM17	0.272967	A	G	-0.200446
187	0.791593	0.0036952	3.22705	3.8864	11	ADAM19	0.0577087	C	G	0.261662
188	-0.933429	2.69318e-05	-5.05318	7.80544	11	ADAM22	0.00327486	A	G	-0.356337
189	0.909569	0.000103191	4.57507	6.56644	11	ADAM23	0.00723239	F	G	0.387806
190	0.0376352	0.912522	0.112959	0.112986	11	ADAM28	0.968882	X	G	0.00951405
191	-0.641566	0.0333566	-2.28249	2.50916	11	ADAM8	0.210997	A	G	-0.0690709
192	0.393949	0.230598	1.2494	1.28583	11	ADAM9	0.576567	B	G	-0.117922
193	0.246293	0.465353	0.754388	0.762364	11	ADAMTS1	0.753002	I	G	-0.154807
194	-0.235741	0.485278	-0.720778	0.727732	11	ADAMTS10	0.766912	X	G	-0.17108
195	-0.473071	0.141668	-1.54206	1.61087	11	ADAMTS12	0.461205	A	G	-0.0126333
196	-0.0621645	0.855919	-0.186734	0.186855	11	ADAMTS13	0.951082	X	G	0.0524884
197	-0.0324854	0.92446	-0.0974904	0.0975075	11	ADAMTS14	0.97318	C	G	0.125278
198	0.494665	0.121901	1.62665	1.70754	11	ADAMTS15	0.427931	B	G	0.431263
199	-0.737599	0.00957412	-2.83558	3.27706	11	ADAMTS17	0.100147	C	G	-0.193632
200	-0.169291	0.618753	-0.512811	0.515312	11	ADAMTS18	0.845071	C	G	-0.0442543
201	0.387867	0.238524	1.22786	1.26243	11	ADAMTS19	0.586183	X	G	-0.0341385
202	-0.273496	0.415778	-0.841914	0.853009	11	ADAMTS2	0.714794	C	G	0.0143791
203	-0.859561	0.000694084	-3.87499	5.04602	11	ADAMTS20	0.0215797	C	G	-0.215067
204	0.238597	0.479848	0.729858	0.737079	11	ADAMTS3	0.763537	F	G	-0.156898
205	-0.918591	6.51689e-05	-4.73978	6.97293	11	ADAMTS5	0.00550106	A	G	-0.273751
206	0.634692	0.0359234	2.2477	2.46398	11	ADAMTS6	0.220641	A	G	-0.0832448
207	-0.303634	0.364027	-0.940553	0.956037	11	ADAMTS7	0.692753	C	G	-0.134474
208	-0.657295	0.0279708	-2.36411	2.61651	11	ADAMTS8	0.191436	B	G	0.0714093
209	-0.819879	0.00200225	-3.46935	4.29604	11	ADAMTS9	0.0404456	C	G	-0.06657
210	0.877497	0.000385574	4.09434	5.48913	11	ADAMTSL1	0.0156053	C	G	0.164429
211	-0.909279	0.000104642	-4.57004	6.55436	11	ADAMTSL2	0.00726527	A	G	0.00137297
212	0.0621967	0.855845	0.186831	0.186952	11	ADAMTSL3	0.951082	C	G	0.0728465
213	-0.331963	0.318594	-1.0351	1.05576	11	ADAMTSL5	0.654599	X	G	-0.0938217
214	-0.119363	0.726668	-0.359804	0.360667	11	ADAP1	0.899597	A	G	0.280127
215	-0.359271	0.277864	-1.12815	1.15492	11	ADAP2	0.628215	C	G	0.121152
216	0.510757	0.108386	1.69126	1.78228	11	ADAR	0.404727	A	G	0.13743
217	0.822542	0.00188012	3.49388	4.33903	11	ADARB1	0.0391778	F	G	0.0741258
218	-0.901335	0.000150885	-4.43787	6.24303	11	ADARB2	0.00928149	F	G	-0.150762
219	-0.228976	0.498246	-0.699326	0.705677	11	ADAT1	0.775174	A	G	0.120347
220	0.0669433	0.844954	0.201131	0.201282	11	ADAT2	0.947975	A	G	0.0315466
221	-0.358427	0.279077	-1.12524	1.15181	11	ADCK1	0.629613	A	G	-0.184335
222	-0.537031	0.0884801	-1.79992	1.90987	11	ADCK2	0.365908	A	G	-0.157764
223	0.293511	0.381024	0.907212	0.921103	11	ADCY1	0.695297	C	G	-0.0699683
224	0.661508	0.0266395	2.38647	2.64625	11	ADCY2	0.186125	A	G	0.31119
225	0.529132	0.0941879	1.76681	1.87074	11	ADCY5	0.377408	A	G	-0.268971
226	0.279322	0.405506	0.860841	0.872703	11	ADCY6	0.708001	D	G	0.135205
227	-0.0264326	0.93851	-0.0793162	0.0793254	11	ADCY7	0.978469	A	G	-0.0993156
228	-0.955311	4.62698e-06	-5.66786	9.69521	11	ADCY8	0.00142516	B	G	0.149436
229	-0.00501214	0.988331	-0.0150365	0.0150366	11	ADCY9	0.996905	A	G	0.465518
230	-0.94729	9.61232e-06	-5.41408	8.87039	11	ADCYAP1	0.00205694	C	G	-0.231546
231	-0.960154	2.78082e-06	-5.84364	10.3068	11	ADCYAP1R1	0.00119013	A	G	0.000145626
232	-0.370821	0.261562	-1.16812	1.19787	11	ADD1	0.611984	X	G	-0.0037984
233	0.348711	0.293251	1.09193	1.1162	11	ADD2	0.63409	D	G	0.00234426
234	-0.275588	0.412074	-0.848705	0.860071	11	ADD3	0.712286	F	G	0.159044
235	-0.848581	0.000957871	-3.75319	4.81178	11	ADGB	0.0261788	A	G	-0.102938
236	-0.732665	0.0103302	-2.80337	3.22954	11	ADGRA1	0.106125	D	G	-0.149505
237	-0.267012	0.427353	-0.820931	0.831215	11	ADGRA2	0.724075	X	G	-0.0768177
238	0.0186254	0.956654	0.0558828	0.055886	11	ADGRA3	0.98536	A	G	-0.0699392
239	-0.136537	0.68893	-0.412186	0.413484	11	ADGRB1	0.881267	X	G	-0.0271025
240	-0.265156	0.430695	-0.814939	0.824998	11	ADGRB2	0.727592	D	G	-0.236465
241	-0.898293	0.000172191	-4.38993	6.13315	11	ADGRB3	0.0100815	B	G	-0.046049
242	-0.461191	0.153354	-1.49647	1.55931	11	ADGRD1	0.479962	X	G	-0.102706
243	0.356187	0.282311	1.11753	1.14356	11	ADGRD2	0.63323	X	G	-0.124066
244	-0.604004	0.0490738	-2.09828	2.27359	11	ADGRF4	0.264856	X	G	-0.0359428
245	0.425399	0.192105	1.3628	1.41015	11	ADGRF5	0.532309	A	G	-0.220655
246	0.597968	0.0520021	2.06993	2.23813	11	ADGRG1	0.273846	X	G	0.269909
247	0.844051	0.00108627	3.70528	4.72184	11	ADGRG2	0.0279774	G	G	0.846
248	0.300366	0.36947	0.929767	0.944723	11	ADGRG3	0.695297	L	G	-0.0030488
249	-0.776198	0.00497177	-3.10721	3.69332	11	ADGRG6	0.0686556	A	G	0.104516
250	0.413609	0.206047	1.31987	1.36287	11	ADGRL2	0.548595	A	G	-0.300791
251	-0.898694	0.000169262	-4.39616	6.14735	11	ADGRL3	0.0100139	B	G	0.139382
252	-0.0953851	0.780265	-0.287028	0.287466	11	ADGRL4	0.922392	A	G	-0.208673
253	-0.646351	0.0316475	-2.30702	2.54122	11	ADGRV1	0.205087	B	G	0.0499537
254	-0.0764175	0.823291	-0.2297	0.229925	11	ADHFE1	0.938885	A	G	-0.022409
255	-0.131098	0.700818	-0.39557	0.396717	11	ADI1	0.887606	A	G	-0.1073
256	NA	NA	NA	NA	11	ADIG	NA	X	G	-0.110075
257	-0.115594	0.735026	-0.348339	0.349122	11	ADIPOQ	0.903379	X	G	-0.0787104
258	0.599936	0.0510347	2.07914	2.24962	11	ADIPOR1	0.270933	D	G	0.0802412
259	-0.2318	0.492814	-0.708273	0.714871	11	ADIPOR2	0.771406	I	G	-0.262345
260	0.637157	0.0349877	2.26012	2.48006	11	ADK	0.217424	A	G	-0.0251377
261	-0.269919	0.422145	-0.830329	0.840971	11	ADM	0.72029	X	G	0.0110811
262	0.217748	0.520101	0.663871	0.669302	11	ADM2	0.790766	X	G	-0.092201
263	0.0454604	0.894413	0.136475	0.136522	11	ADNP	0.962865	A	G	-0.0563102
264	-0.592266	0.0548761	-2.04345	2.20517	11	ADNP2	0.281734	A	G	-0.16665
265	-0.189622	0.576548	-0.575834	0.579376	11	ADO	0.822865	D	G	0.195271
266	-0.613927	0.0445097	-2.1456	2.33325	11	ADORA2A	0.250088	A	G	-0.248203
267	0.259034	0.441806	0.795218	0.804563	11	ADORA2B	0.734864	B	G	-0.0468016
268	0.836425	0.00133105	3.62746	4.57829	11	ADORA3	0.0319119	A	G	0.224338
269	-0.42626	0.191111	-1.36595	1.41364	11	ADPGK	0.531479	A	G	0.344575
270	0.0854773	0.802678	0.257059	0.257374	11	ADPRH	0.930475	I	G	0.0882956
271	-0.167502	0.62252	-0.507286	0.509707	11	ADPRHL1	0.846795	A	G	-0.170533
272	0.399118	0.223986	1.2678	1.30587	11	ADPRM	0.569088	X	G	0.160393
273	-0.260118	0.439829	-0.798704	0.808173	11	ADPRS	0.73317	X	G	0.0263407
274	0.495922	0.120809	1.63165	1.71329	11	ADRA1A	0.426322	C	G	-0.0131523
275	-0.499466	0.117762	-1.64578	1.72958	11	ADRA1B	0.420141	X	G	-0.123549
276	0.268095	0.425409	0.824432	0.834848	11	ADRA1D	0.723033	F	G	-0.141658
277	0.0854767	0.802679	0.257057	0.257372	11	ADRA2A	0.930475	F	G	-0.171443
278	-0.463572	0.150966	-1.50556	1.56955	11	ADRA2C	0.476191	A	G	-0.273057
279	-0.752654	0.00751555	-2.93715	3.42939	11	ADRB1	0.0856517	A	G	-0.209415
280	0.650879	0.0300874	2.33047	2.57203	11	ADRB2	0.198938	D	G	0.0179358
281	-0.399231	0.223843	-1.2682	1.30631	11	ADRB3	0.569088	X	G	0.0153017
282	0.130183	0.702823	0.392779	0.393902	11	ADRM1	0.888356	X	G	0.0662211
283	0.162341	0.633431	0.491369	0.493569	11	ADSL	0.852437	A	G	-0.179363
284	0.883065	0.000315369	4.16856	5.64559	11	ADSS1	0.0140576	G	G	0.73233
285	0.657325	0.0279613	2.36426	2.61671	11	ADSS2	0.191436	C	G	0.140557
286	0.0395235	0.908149	0.118632	0.118663	11	ADTRP	0.967467	B	G	0.248004
287	-0.253539	0.451892	-0.777574	0.786309	11	AEBP1	0.742268	X	G	-0.141002
288	-0.827281	0.00167665	-3.53837	4.41775	11	AEBP2	0.0365464	B	G	0.0892106
289	-0.274868	0.413347	-0.846366	0.857638	11	AEN	0.713567	A	G	0.0323535
290	-0.673477	0.0231017	-2.45124	2.73324	11	AFAP1	0.17179	X	G	0.134083
291	0.908977	0.000106173	4.56481	6.54181	11	AFAP1L1	0.00732531	I	G	-0.0554779
292	0.0161768	0.962349	0.0485345	0.0485367	11	AFAP1L2	0.987693	C	G	-0.176834
293	0.755076	0.00721746	2.95398	3.45501	11	AFDN	0.0843539	C	G	0.0362046
294	0.68014	0.0212842	2.48812	2.78334	11	AFF1	0.164251	A	G	-0.0703773
295	0.808566	0.00258831	3.36862	4.12249	11	AFF2	0.0469466	A	G	0.629066
296	0.828046	0.00164539	3.54566	4.43074	11	AFF3	0.0360928	A	G	-0.00602419
297	-0.0878399	0.797321	-0.264201	0.264542	11	AFF4	0.92844	A	G	-0.162686
298	0.0977154	0.775014	0.294084	0.294556	11	AFG1L	0.920008	A	G	-0.0764691
299	-0.407054	0.214052	-1.29622	1.33693	11	AFG3L2	0.558669	B	G	-0.27689
300	0.459283	0.155285	1.48921	1.55113	11	AFMID	0.482671	A	G	0.124417
301	-0.656646	0.0281801	-2.36068	2.61196	11	AFTPH	0.192215	A	G	-0.185749
302	-0.0220359	0.948725	-0.0661185	0.0661238	11	AGA	0.982009	A	G	-0.0566947
303	-0.770213	0.00554661	-3.06255	3.6229	11	AGAP1	0.0729693	A	G	-0.208627
304	-0.547752	0.0811068	-1.84549	1.96411	11	AGAP2	0.348752	A	G	-0.294936
305	-0.199246	0.556968	-0.605842	0.609968	11	AGAP3	0.812107	H	G	0.193845
306	-0.880815	0.000342458	-4.13817	5.58112	11	AGBL1	0.0147191	B	G	-0.149407
307	-0.270207	0.421629	-0.831263	0.841941	11	AGBL2	0.720077	C	G	0.107156
308	-0.300994	0.368421	-0.931838	0.946895	11	AGBL5	0.695297	D	G	0.134081
309	0.692247	0.0182455	2.55677	2.87773	11	AGFG1	0.14913	A	G	-0.119044
310	-0.234742	0.487183	-0.717605	0.724468	11	AGGF1	0.768218	E	G	0.097515
311	0.281157	0.402298	0.866814	0.878926	11	AGK	0.706047	D	G	0.139145
312	0.73974	0.00925904	2.84971	3.29802	11	AGL	0.0984385	X	G	0.103401
313	0.000154093	0.999641	0.00046228	0.00046228	11	AGMAT	0.99992	X	G	-0.0253546
314	-0.389618	0.236226	-1.23405	1.26915	11	AGMO	0.583529	A	G	-0.217252
315	-0.563058	0.0713057	-1.9119	2.04397	11	AGO2	0.325684	X	G	-0.212832
316	-0.913445	8.52149e-05	-4.64382	6.73364	11	AGO3	0.00646665	C	G	-0.327374
317	-0.351367	0.289338	-1.10101	1.12589	11	AGPAT2	0.63409	B	G	0.276005
318	0.802345	0.00296034	3.31548	4.03283	11	AGPAT3	0.0507218	A	G	0.084537
319	-0.834276	0.00140697	-3.60612	4.53948	11	AGPAT4	0.032832	B	G	0.0491105
320	0.596953	0.0525059	2.0652	2.23222	11	AGPAT5	0.275256	B	G	-0.107424
321	0.492278	0.123994	1.61719	1.69666	11	AGPS	0.431724	B	G	0.0287291
322	0.568416	0.0680722	1.93554	2.07264	11	AGR2	0.316888	X	G	0.387654
323	-0.0178881	0.958368	-0.05367	0.0536729	11	AGR3	0.986099	C	G	-0.10755
324	0.0972571	0.776046	0.292697	0.293161	11	AGRN	0.920248	A	G	-0.173703
325	0.271346	0.419599	0.834948	0.845769	11	AGRP	0.717768	E	G	-0.180337
326	-0.138553	0.684541	-0.418349	0.419707	11	AGT	0.878891	B	G	0.0581662
327	-0.114591	0.737254	-0.345291	0.346054	11	AGTPBP1	0.904426	E	G	0.0956706
328	-0.790063	0.00380979	-3.2148	3.86638	11	AGTR1	0.0587233	X	G	-0.231942
329	-0.203876	0.547646	-0.620319	0.624749	11	AGTR2	0.807084	X	G	-0.0946015
330	-0.399167	0.223924	-1.26797	1.30606	11	AGTRAP	0.569088	F	G	-0.017989
331	NA	NA	NA	NA	11	AGXT	NA	X	G	-0.0643373
332	0.811755	0.00241169	3.39646	4.16998	11	AHCTF1	0.0448393	D	G	0.143691
333	0.279399	0.405372	0.86109	0.872963	11	AHCY	0.708001	A	G	0.465757
334	-0.465926	0.148628	-1.51456	1.57972	11	AHCYL1	0.471999	D	G	-0.265979
335	0.685745	0.0198358	2.51964	2.82649	11	AHCYL2	0.157271	A	G	-0.222536
336	-0.237791	0.481376	-0.727295	0.734441	11	AHDC1	0.765131	D	G	0.0963977
337	0.20996	0.535491	0.63939	0.644241	11	AHI1	0.801205	A	G	0.10052
338	-0.328282	0.324317	-1.0227	1.04263	11	AHNAK	0.659102	X	G	-0.0261953
339	0.558361	0.0742236	1.89135	2.01915	11	AHNAK2	0.332889	F	G	-0.0820824
340	-0.770886	0.00547967	-3.06752	3.6307	11	AHR	0.072666	A	G	0.00922375
341	-0.0361781	0.915898	-0.108582	0.108605	11	AHRR	0.970873	X	G	0.190195
342	-0.243392	0.470792	-0.745131	0.752816	11	AHSA1	0.756389	X	G	-0.162382
343	0.346744	0.296168	1.08521	1.10904	11	AHSA2P	0.63409	X	G	-0.104345
344	-0.693938	0.0178473	-2.56654	2.89127	11	AHSG	0.147258	I	G	-0.339755
345	0.534151	0.090534	1.78781	1.89552	11	AICDA	0.369465	F	G	0.0657344
346	-0.0659927	0.847133	-0.198266	0.198411	11	AIDA	0.948815	B	G	0.395505
347	-0.00387081	0.990988	-0.0116125	0.0116125	11	AIF1L	0.997434	B	G	-0.272637
348	-0.254293	0.450502	-0.779992	0.788809	11	AIFM1	0.741498	D	G	-0.0502042
349	0.03538	0.917748	0.106184	0.106207	11	AIFM2	0.970967	X	G	-0.0257126
350	0.0276959	0.935576	0.0831089	0.0831196	11	AIFM3	0.977768	F	G	-0.186692
351	0.583303	0.0596096	2.00237	2.15439	11	AIG1	0.294751	A	G	0.038906
352	0.362808	0.272813	1.14035	1.16801	11	AIMP1	0.623651	H	G	-0.0352289
353	0.338177	0.309057	1.0561	1.07805	11	AIMP2	0.646203	A	G	0.0577228
354	-0.0706908	0.836373	-0.212427	0.212604	11	AIP	0.944618	D	G	0.0295193
355	-0.830325	0.00155493	-3.56754	4.46988	11	AJAP1	0.0351038	F	G	-0.222792
356	0.644805	0.0321928	2.29906	2.53081	11	AK1	0.207152	D	G	-0.148495
357	-0.0272873	0.936525	-0.0818822	0.0818923	11	AK2	0.977819	X	G	0.0034426
358	0.0968276	0.777014	0.291396	0.291854	11	AK3	0.920735	E	G	-0.0166927
359	0.233459	0.489635	0.713535	0.720281	11	AK4	0.769632	B	G	0.363716
360	-0.446517	0.168595	-1.44102	1.49708	11	AK5	0.50265	A	G	-0.191899
361	0.126014	0.711983	0.380063	0.381081	11	AK6	0.892642	E	G	0.0964903
362	-0.526292	0.0962973	-1.75501	1.85684	11	AK7	0.381679	C	G	-0.112761
363	-0.617104	0.0431125	-2.16094	2.35272	11	AK8	0.245703	B	G	0.151423
364	-0.0578832	0.865761	-0.173844	0.173941	11	AK9	0.954029	A	G	-0.140446
365	-0.507708	0.110868	-1.67891	1.76793	11	AKAIN1	0.408129	C	G	0.122237
366	-0.760538	0.0065772	-2.99247	3.514	11	AKAP1	0.0801709	B	G	-0.240612
367	0.0585527	0.864221	0.175859	0.17596	11	AKAP10	0.953898	B	G	-0.169584
368	-0.42356	0.194242	-1.35607	1.40272	11	AKAP11	0.535075	A	G	-0.231102
369	-0.256469	0.446501	-0.786975	0.796032	11	AKAP12	0.738174	F	G	-0.165445
370	0.286195	0.393554	0.883249	0.896065	11	AKAP13	0.698429	A	G	-0.218634
371	0.0895771	0.793386	0.269454	0.269816	11	AKAP14	0.927038	E	G	-0.0264453
372	0.00935814	0.978215	0.0280752	0.0280756	11	AKAP17A	0.994028	A	G	-0.138028
373	-0.535789	0.0893623	-1.79469	1.90367	11	AKAP5	0.367441	C	G	-0.0457582
374	0.256471	0.446497	0.786981	0.796038	11	AKAP6	0.738174	F	G	0.107851
375	-0.319998	0.337394	-0.994935	1.01327	11	AKAP7	0.669794	C	G	-0.0601078
376	0.271654	0.419051	0.835945	0.846805	11	AKAP8L	0.717623	X	G	0.223509
377	0.241203	0.474916	0.738154	0.745625	11	AKAP9	0.759858	A	G	-0.142764
378	0.0614197	0.85763	0.184491	0.184608	11	AKIP1	0.95136	K	G	0.0288058
379	-0.151262	0.657071	-0.457295	0.459068	11	AKIRIN2	0.86607	D	G	0.144554
380	0.230465	0.495379	0.704042	0.710522	11	AKNA	0.773014	X	G	0.0311357
381	-0.138224	0.685256	-0.417345	0.418692	11	AKNAD1	0.879142	X	G	0.154777
382	0.201088	0.553252	0.611598	0.615843	11	AKR1A1	0.809492	B	G	0.266905
383	-0.759439	0.00670255	-2.98466	3.50199	11	AKR1D1	0.0809807	B	G	-0.0140538
384	0.434144	0.182143	1.39498	1.44579	11	AKR7A2	0.520274	E	G	0.191297
385	-0.21468	0.526141	-0.654217	0.659415	11	AKT1	0.795671	B	G	0.142915
386	0.274144	0.414629	0.844016	0.855195	11	AKT3	0.714563	A	G	0.308116
387	-0.50571	0.112515	-1.67084	1.75857	11	AKTIP	0.410601	A	G	0.0298224
388	-0.288887	0.388919	-0.892055	0.905259	11	ALAD	0.695297	B	G	-0.111968
389	0.54114	0.0856036	1.8173	1.9305	11	ALAS1	0.359056	D	G	0.0580581
390	-0.301063	0.368307	-0.932063	0.947131	11	ALB	0.695297	X	G	-0.0974972
391	0.0633116	0.853285	0.190189	0.190317	11	ALCAM	0.950376	A	G	-0.0786973
392	0.563507	0.0710307	1.91387	2.04636	11	ALDH18A1	0.324738	C	G	0.102455
393	0.460196	0.15436	1.49268	1.55504	11	ALDH1A1	0.481462	X	G	0.283478
394	0.943807	1.2755e-05	5.31541	8.56713	11	ALDH1A2	0.00241279	F	G	-0.0026713
395	0.146093	0.668199	0.441439	0.443034	11	ALDH1A3	0.870847	X	G	0.0130476
396	0.21808	0.519449	0.664917	0.670374	11	ALDH1L2	0.790494	A	G	0.249536
397	-0.0609432	0.858724	-0.183057	0.18317	11	ALDH2	0.951952	C	G	-0.0181831
398	-0.146107	0.66817	-0.44148	0.443076	11	ALDH3A2	0.870847	X	G	-0.158088
399	0.00513405	0.988047	0.0154023	0.0154024	11	ALDH4A1	0.996774	B	G	0.123024
400	-0.578766	0.0621086	-1.98181	2.12914	11	ALDH5A1	0.301563	B	G	-0.133517
401	-0.704449	0.0155106	-2.62823	2.97757	11	ALDH6A1	0.135723	B	G	-0.0237259
402	-0.13515	0.691957	-0.407945	0.409204	11	ALDH7A1	0.882439	X	G	0.191386
403	-0.451348	0.163479	-1.45917	1.51739	11	ALDH8A1	0.495739	A	G	-0.176659
404	0.128506	0.706504	0.387661	0.388741	11	ALDH9A1	0.890044	C	G	0.196046
405	-0.372598	0.259105	-1.17431	1.20453	11	ALDOB	0.609294	A	G	0.284219
406	0.188877	0.578073	0.573517	0.577017	11	ALDOC	0.823567	A	G	0.0182386
407	-0.4154	0.203892	-1.32636	1.36999	11	ALG1	0.545963	X	G	0.179081
408	-0.662613	0.0262976	-2.39238	2.65413	11	ALG11	0.184248	A	G	-0.255449
409	-0.560102	0.0731328	-1.89895	2.02832	11	ALG12	0.329809	B	G	0.267099
410	0.474068	0.140714	1.54591	1.61525	11	ALG14	0.459348	E	G	-0.0860124
411	-0.0733828	0.830219	-0.220545	0.220743	11	ALG2	0.942532	X	G	-0.0420407
412	-0.20658	0.54223	-0.628788	0.633402	11	ALG3	0.804042	D	G	-0.0440964
413	0.36656	0.267512	1.15333	1.18195	11	ALG5	0.619289	B	G	0.392141
414	0.269738	0.422468	0.829743	0.840362	11	ALG6	0.720349	C	G	0.14558
415	-0.218348	0.518921	-0.665764	0.671242	11	ALG8	0.790411	B	G	0.2108
416	-0.663751	0.0259493	-2.39847	2.66227	11	ALG9	0.183164	A	G	-0.0382967
417	-0.812417	0.00237616	-3.40229	4.17998	11	ALK	0.0445548	X	G	-0.250516
418	0.572559	0.0656406	1.95396	2.09508	11	ALKAL1	0.3106	A	G	-0.0622717
419	-0.147709	0.664713	-0.446394	0.448043	11	ALKAL2	0.869526	A	G	-0.0059506
420	-0.386465	0.240373	-1.22291	1.25706	11	ALKBH1	0.588573	A	G	0.131294
421	-0.0896265	0.793275	-0.269603	0.269966	11	ALKBH2	0.927014	X	G	0.0782996
422	0.172168	0.612715	0.521699	0.524332	11	ALKBH3	0.842037	L	G	0.00901958
423	0.280469	0.4035	0.864572	0.876589	11	ALKBH4	0.706658	A	G	0.303196
424	-0.328884	0.323377	-1.02473	1.04477	11	ALKBH5	0.658374	A	G	-0.376612
425	0.220824	0.514073	0.673567	0.67924	11	ALKBH7	0.786296	D	G	-0.120989
426	-0.311514	0.351071	-0.966663	0.983477	11	ALKBH8	0.681705	A	G	-0.0181378
427	-0.559265	0.0736562	-1.89529	2.0239	11	ALMS1	0.331231	A	G	-0.128026
428	0.911486	9.39708e-05	4.60872	6.64784	11	ALOX5	0.00684863	C	G	-0.108644
429	0.293317	0.381355	0.906574	0.920435	11	ALOX5AP	0.695297	C	G	0.291372
430	0.325881	0.328078	1.01464	1.03409	11	ALPK1	0.662254	F	G	0.106035
431	-0.0840141	0.806	-0.252638	0.252937	11	ALPK3	0.932165	X	G	0.0945413
432	0.501602	0.115949	1.65433	1.73946	11	ALPL	0.417018	X	G	-0.233861
433	0.343196	0.301471	1.07313	1.09616	11	ALS2	0.638732	F	G	0.269128
434	-0.237385	0.482148	-0.726004	0.733111	11	ALS2CL	0.765397	X	G	0.0250515
435	-0.277727	0.408306	-0.855652	0.8673	11	ALX1	0.710044	X	G	-0.00357215
436	0.40824	0.21259	1.30049	1.34161	11	ALX3	0.556431	X	G	0.064826
437	0.0528024	0.877464	0.158555	0.158628	11	ALX4	0.957591	X	G	0.36499
438	0.382955	0.245038	1.21055	1.24367	11	ALYREF	0.594106	D	G	0.123473
439	-0.113961	0.738655	-0.343376	0.344126	11	AMACR	0.90504	E	G	0.0654383
440	-0.0817467	0.811153	-0.245789	0.246064	11	AMBP	0.934094	A	G	-0.049927
441	-0.392094	0.232998	-1.24282	1.27867	11	AMBRA1	0.579113	A	G	-0.175447
442	0.551285	0.0787693	1.86068	1.98229	11	AMD1	0.343111	B	G	0.0862115
443	0.128953	0.705523	0.389025	0.390116	11	AMDHD1	0.889283	X	G	-0.189264
444	-0.044316	0.897059	-0.133035	0.133079	11	AMDHD2	0.964062	A	G	0.177344
445	-0.147302	0.665591	-0.445146	0.446781	11	AMER1	0.870108	A	G	-0.294071
446	-0.532879	0.0914512	-1.78247	1.88921	11	AMER2	0.371474	A	G	-0.00137503
447	-0.540454	0.0860799	-1.81439	1.92704	11	AMER3	0.35977	C	G	-0.061767
448	-0.443631	0.171697	-1.43023	1.48503	11	AMFR	0.50764	A	G	-0.249115
449	-0.732353	0.0103793	-2.80135	3.22658	11	AMH	0.106358	A	G	-0.268269
450	-0.283242	0.398668	-0.873609	0.886009	11	AMHR2	0.703315	A	G	-0.253406
451	0.399585	0.223393	1.26947	1.30769	11	AMIGO1	0.568588	D	G	0.0266371
452	-0.946316	1.04232e-05	-5.38586	8.78269	11	AMIGO2	0.00214194	A	G	-0.292983
453	0.230451	0.495405	0.703998	0.710477	11	AMIGO3	0.773014	A	G	-0.174817
454	0.0498937	0.884174	0.149805	0.149868	11	AMMECR1	0.959168	F	G	-0.102768
455	0.28069	0.403113	0.865293	0.877341	11	AMMECR1L	0.706658	X	G	0.00510473
456	0.668758	0.024454	2.42548	2.69849	11	AMN	0.177631	X	G	0.0593909
457	-0.141399	0.678358	-0.427059	0.428503	11	AMN1	0.875897	E	G	0.148445
458	0.688906	0.0190508	2.53761	2.85123	11	AMOT	0.153344	B	G	0.179788
459	-0.872418	0.000459397	-4.02934	5.35487	11	AMOTL1	0.0172403	B	G	0.0599504
460	0.180219	0.595929	0.546626	0.549656	11	AMOTL2	0.833017	X	G	0.209612
461	0.406976	0.214148	1.29595	1.33663	11	AMPD1	0.558774	X	G	0.0555957
462	-0.138545	0.684558	-0.418326	0.419683	11	AMPD2	0.878891	B	G	0.0178279
463	-0.421914	0.196165	-1.35006	1.39609	11	AMPD3	0.537072	F	G	-0.0965993
464	0.367709	0.265901	1.15731	1.18623	11	AMPH	0.617834	B	G	0.261144
465	0.522733	0.0989843	1.74028	1.83954	11	AMT	0.387231	A	G	0.0543169
466	-0.880756	0.00034319	-4.13738	5.57946	11	AMZ1	0.0147191	C	G	-0.0759347
467	0.170679	0.615838	0.517097	0.519661	11	ANAPC1	0.843694	A	G	-0.0741598
468	0.913874	8.33855e-05	4.6516	6.75278	11	ANAPC10	0.00642378	A	G	0.141371
469	-0.220417	0.514868	-0.672285	0.677926	11	ANAPC11	0.786674	D	G	0.0850861
470	-0.0549704	0.872468	-0.165078	0.165161	11	ANAPC13	0.956175	A	G	-0.113855
471	0.247811	0.462519	0.759237	0.767367	11	ANAPC15	0.750711	B	G	0.112442
472	0.23176	0.49289	0.708147	0.714742	11	ANAPC16	0.771406	E	G	0.307024
473	0.363274	0.272152	1.14196	1.16973	11	ANAPC2	0.623217	A	G	0.210333
474	0.605482	0.0483743	2.10527	2.28237	11	ANAPC4	0.262419	D	G	0.0780471
475	-0.572817	0.0654913	-1.95511	2.09648	11	ANAPC5	0.310185	B	G	-0.0558628
476	0.178978	0.598504	0.542781	0.545747	11	ANAPC7	0.834649	D	G	0.225671
477	-0.29534	0.377924	-0.913219	0.927389	11	ANGEL1	0.695297	A	G	-0.13343
478	-0.41053	0.209784	-1.30875	1.35066	11	ANGEL2	0.552765	B	G	-0.123925
479	0.484318	0.131138	1.58583	1.66072	11	ANGPT1	0.443798	C	G	-0.16543
480	0.594488	0.0537436	2.05374	2.21795	11	ANGPT2	0.278784	F	G	-0.0980586
481	0.531893	0.0921659	1.77834	1.88434	11	ANGPT4	0.373127	X	G	0.0288831
482	0.115987	0.734154	0.349534	0.350326	11	ANGPTL1	0.902919	X	G	0.0820057
483	-0.281125	0.402354	-0.866709	0.878816	11	ANGPTL2	0.706047	X	G	0.000474755
484	-0.478714	0.13632	-1.56394	1.63575	11	ANGPTL3	0.451924	A	G	-0.283983
485	-0.168429	0.620567	-0.510148	0.51261	11	ANGPTL4	0.845827	C	G	-0.0106565
486	0.484882	0.130623	1.58804	1.66325	11	ANGPTL5	0.443233	A	G	0.00152679
487	-0.49861	0.118493	-1.64236	1.72564	11	ANGPTL7	0.421814	C	G	-0.113452
488	-0.112144	0.7427	-0.337854	0.338569	11	ANHX	0.906507	B	G	0.193164
489	0.445694	0.169476	1.43794	1.49364	11	ANK1	0.503917	B	G	-0.166834
490	0.585426	0.0584642	2.01204	2.1663	11	ANK2	0.291452	C	G	0.0644426
491	-0.0981521	0.774031	-0.295407	0.295885	11	ANK3	0.919539	A	G	-0.338128
492	-0.884039	0.00030416	-4.18188	5.67404	11	ANKDD1A	0.0137487	A	G	-0.154315
493	0.402683	0.21949	1.28054	1.31978	11	ANKDD1B	0.564563	E	G	0.220191
494	-0.336405	0.31176	-1.0501	1.07168	11	ANKEF1	0.648118	A	G	0.160592
495	-0.907605	0.000113335	-4.5413	6.48559	11	ANKFN1	0.00767589	A	G	-0.211095
496	0.00357348	0.99168	0.0107205	0.0107205	11	ANKFY1	0.997758	B	G	0.280712
497	-0.486675	0.128996	-1.59508	1.6713	11	ANKH	0.439864	A	G	-0.257568
498	-0.273332	0.416068	-0.841384	0.852458	11	ANKHD1	0.715072	H	G	0.121932
499	-0.309855	0.353778	-0.961155	0.977683	11	ANKIB1	0.683734	A	G	-0.156815
500	0.0607234	0.85923	0.182395	0.182507	11	ANKK1	0.952156	A	G	-0.183335
501	-0.251828	0.455054	-0.772091	0.780643	11	ANKLE2	0.744603	C	G	-0.100175
502	-0.651083	0.0300185	-2.33153	2.57343	11	ANKMY2	0.198862	B	G	-0.0775107
503	-0.330537	0.320804	-1.03029	1.05067	11	ANKRA2	0.65673	E	G	0.214221
504	-0.266952	0.427462	-0.820737	0.831013	11	ANKRD1	0.724109	X	G	-0.107163
505	-0.572007	0.0659609	-1.9515	2.09208	11	ANKRD10	0.311556	A	G	-0.100919
506	0.175869	0.604977	0.533148	0.535959	11	ANKRD11	0.838094	B	G	0.173533
507	-0.57216	0.0658723	-1.95218	2.0929	11	ANKRD12	0.31133	X	G	0.00977067
508	-0.0416238	0.903287	-0.124944	0.12498	11	ANKRD13A	0.965502	A	G	-0.321616
509	0.309329	0.354639	0.959409	0.975847	11	ANKRD13B	0.684458	A	G	0.173558
510	-0.575784	0.0637886	-1.9684	2.11271	11	ANKRD13C	0.305422	D	G	-0.0894806
511	-0.200537	0.554363	-0.609875	0.614085	11	ANKRD13D	0.810157	D	G	-0.131661
512	-0.253629	0.451727	-0.777861	0.786606	11	ANKRD16	0.742262	J	G	-0.127451
513	0.0893232	0.793961	0.268686	0.269045	11	ANKRD17	0.927333	A	G	-0.346068
514	-0.453772	0.160947	-1.46832	1.52765	11	ANKRD2	0.491306	X	G	-0.0491571
515	-0.554903	0.0764225	-1.87631	2.00106	11	ANKRD22	0.33751	X	G	-0.306442
516	0.571847	0.0660541	1.95079	2.0912	11	ANKRD24	0.311823	B	G	-0.0371616
517	-0.0936698	0.784135	-0.281836	0.28225	11	ANKRD26	0.923309	A	G	-0.141787
518	0.047587	0.8895	0.142869	0.142923	11	ANKRD27	0.960998	F	G	-0.178772
519	-0.896547	0.000185421	-4.363	6.07212	11	ANKRD28	0.010487	A	G	-0.208552
520	0.873811	0.000438167	4.04692	5.39095	11	ANKRD29	0.0168201	C	G	0.265369
521	0.2752	0.412759	0.847445	0.858761	11	ANKRD31	0.712956	E	G	0.412124
522	-0.126414	0.711104	-0.381281	0.382309	11	ANKRD33	0.892318	X	G	0.0418225
523	-0.896742	0.000183904	-4.36599	6.07887	11	ANKRD33B	0.0104794	B	G	-0.0580982
524	0.164395	0.629079	0.497703	0.499989	11	ANKRD34A	0.850112	D	G	0.161557
525	0.143612	0.673562	0.433836	0.43535	11	ANKRD34B	0.873152	E	G	-0.0349965
526	-0.420742	0.197542	-1.34578	1.39137	11	ANKRD34C	0.538695	D	G	0.0824765
527	0.223817	0.508237	0.683013	0.688929	11	ANKRD35	0.781794	B	G	-0.10319
528	-0.261608	0.437119	-0.8035	0.813141	11	ANKRD37	0.731486	A	G	-0.157113
529	0.41287	0.20694	1.3172	1.35993	11	ANKRD39	0.549736	X	G	0.245297
530	0.13804	0.685658	0.41678	0.418122	11	ANKRD40	0.879256	A	G	-0.23596
531	-0.0980986	0.774152	-0.295245	0.295722	11	ANKRD42	0.919628	X	G	0.0950691
532	-0.667448	0.0248392	-2.41838	2.68895	11	ANKRD44	0.179318	B	G	0.265837
533	0.00957233	0.977716	0.0287179	0.0287183	11	ANKRD46	0.993744	B	G	0.18532
534	-0.197064	0.561383	-0.59903	0.603018	11	ANKRD49	0.815499	B	G	0.137135
535	-0.0937841	0.783877	-0.282182	0.282598	11	ANKRD50	0.923275	A	G	-0.0498795
536	0.406198	0.215111	1.29315	1.33357	11	ANKRD52	0.559833	D	G	0.140645
537	-0.358283	0.279284	-1.12474	1.15128	11	ANKRD54	0.63001	B	G	-0.0264806
538	0.613712	0.0446054	2.14456	2.33194	11	ANKRD55	0.250275	E	G	0.4049
539	-0.824706	0.00178504	-3.51406	4.37462	11	ANKRD6	0.0376409	B	G	0.00490124
540	0.000503761	0.998827	0.00151128	0.00151128	11	ANKRD66	0.999863	C	G	0.165459
541	0.706904	0.0149981	2.64291	2.99828	11	ANKRD9	0.133261	B	G	0.0315487
542	0.819508	0.00201976	3.46595	4.29011	11	ANKS1A	0.0405059	A	G	0.174154
543	-0.67009	0.0240669	-2.43272	2.70824	11	ANKS1B	0.175768	B	G	0.234965
544	-0.570125	0.0670617	-1.94312	2.08187	11	ANKS3	0.314393	D	G	-0.0959984
545	0.201459	0.552504	0.612758	0.617027	11	ANKS4B	0.809293	F	G	0.160614
546	-0.657003	0.0280647	-2.36257	2.61446	11	ANKS6	0.191807	X	G	-0.0446961
547	-0.18097	0.594372	-0.548955	0.552024	11	ANKZF1	0.832022	D	G	-0.0965362
548	0.509547	0.109366	1.68635	1.77657	11	ANLN	0.406354	I	G	-0.342493
549	-0.363154	0.272322	-1.14154	1.16929	11	ANO1	0.623322	C	G	-0.226015
550	0.434416	0.181838	1.39598	1.44691	11	ANO10	0.520165	B	G	0.401941
551	-0.157181	0.644405	-0.475484	0.477477	11	ANO3	0.858765	A	G	-0.277984
552	-0.0756199	0.825111	-0.227294	0.227511	11	ANO4	0.93976	A	G	-0.227747
553	0.792476	0.00363021	3.23416	3.89804	11	ANO5	0.0571863	A	G	0.574346
554	0.0448817	0.895751	0.134735	0.134781	11	ANO6	0.963531	E	G	0.22031
555	0.167364	0.622811	0.506859	0.509274	11	ANO8	0.846833	D	G	-0.16445
556	0.270123	0.421781	0.830988	0.841656	11	ANO9	0.720214	X	G	0.117053
557	0.0515992	0.880239	0.154935	0.155004	11	ANOS1	0.957645	C	G	-0.135271
558	0.14077	0.679723	0.425133	0.426557	11	ANP32A	0.876714	A	G	-0.137269
559	-0.61333	0.0447757	-2.14272	2.32961	11	ANP32E	0.250881	B	G	0.04018
560	0.51309	0.10651	1.70074	1.79332	11	ANPEP	0.400732	X	G	0.0365221
561	0.20205	0.551314	0.614608	0.618916	11	ANTKMT	0.80893	X	G	0.045677
562	0.490426	0.125633	1.60987	1.68825	11	ANTXR1	0.434612	X	G	0.28727
563	-0.460797	0.153751	-1.49497	1.55762	11	ANTXR2	0.480458	B	G	0.391649
564	0.571445	0.0662888	1.949	2.08902	11	ANTXRL	0.312125	C	G	-0.0146042
565	-0.039184	0.908935	-0.117612	0.117642	11	ANXA1	0.967467	X	G	0.239777
566	-0.121939	0.72097	-0.367648	0.368569	11	ANXA10	0.897181	F	G	0.0544506
567	-0.445622	0.169553	-1.43767	1.49334	11	ANXA11	0.503998	A	G	-0.174616
568	0.176349	0.603975	0.534637	0.537472	11	ANXA13	0.837428	X	G	0.0857577
569	-0.238584	0.479872	-0.729816	0.737036	11	ANXA2	0.763537	C	G	0.181952
570	0.257229	0.445108	0.789415	0.798557	11	ANXA4	0.737083	A	G	0.138755
571	-0.444733	0.170508	-1.43435	1.48962	11	ANXA5	0.505866	X	G	-0.153191
572	0.666194	0.0252119	2.41161	2.67986	11	ANXA6	0.180219	D	G	-0.0643486
573	-0.384415	0.243091	-1.21569	1.24923	11	ANXA7	0.592258	A	G	0.103991
574	0.483634	0.131763	1.58315	1.65766	11	AOAH	0.444402	X	G	0.0356963
575	-0.730895	0.0106117	-2.79194	3.21277	11	AOC1	0.107738	D	G	-0.0675668
576	-0.753179	0.00745014	-2.94079	3.43491	11	AOPEP	0.0855363	E	G	0.0312595
577	-0.343522	0.30098	-1.07424	1.09735	11	AOX1	0.638193	X	G	-0.0269103
578	-0.231155	0.494054	-0.706227	0.712768	11	AP1AR	0.771961	B	G	-0.0395792
579	-0.271248	0.419773	-0.834631	0.84544	11	AP1B1	0.717944	D	G	0.0318295
580	-0.444775	0.170463	-1.4345	1.4898	11	AP1G1	0.505866	B	G	0.097605
581	-0.357176	0.280881	-1.12093	1.1472	11	AP1M1	0.631911	B	G	0.0931621
582	0.0869546	0.799327	0.261524	0.261856	11	AP1M2	0.928883	A	G	-0.170423
583	-0.292408	0.382901	-0.903592	0.917316	11	AP1S1	0.695297	X	G	-0.118675
584	-0.735589	0.00987703	-2.8224	3.25757	11	AP1S2	0.102675	I	G	-0.364969
585	-0.287227	0.391773	-0.886625	0.899589	11	AP1S3	0.697026	C	G	-0.102672
586	0.437442	0.178469	1.40719	1.45936	11	AP2A2	0.517052	A	G	0.525704
587	0.66677	0.0250402	2.41471	2.68403	11	AP2B1	0.17987	A	G	0.56128
588	0.471094	0.143573	1.53443	1.60221	11	AP2S1	0.46464	A	G	0.276799
589	0.769878	0.00558013	3.06009	3.61904	11	AP3B1	0.073114	E	G	0.0569214
590	0.415634	0.203611	1.32721	1.37093	11	AP3B2	0.545841	B	G	0.256278
591	0.000395732	0.999079	0.00118719	0.00118719	11	AP3D1	0.999891	A	G	0.0296076
592	0.659778	0.0271806	2.37726	2.63398	11	AP3M1	0.188016	X	G	0.20461
593	-0.336925	0.310967	-1.05186	1.07354	11	AP3M2	0.647199	A	G	-0.0350612
594	0.39395	0.230597	1.2494	1.28583	11	AP3S1	0.576567	A	G	0.323585
595	0.0277531	0.935443	0.0832807	0.0832914	11	AP3S2	0.977731	D	G	-0.0362045
596	0.0954065	0.780216	0.287093	0.287531	11	AP4B1	0.922392	X	G	-0.128918
597	0.547349	0.0813757	1.84377	1.96205	11	AP4E1	0.349362	A	G	0.255525
598	-0.140006	0.681382	-0.422795	0.424196	11	AP4S1	0.87769	X	G	0.0127944
599	0.435472	0.180658	1.39989	1.45125	11	AP5M1	0.519282	X	G	0.157215
600	-0.0297822	0.930733	-0.0893729	0.0893861	11	AP5S1	0.9755	A	G	0.0541639
601	0.0483671	0.887698	0.145215	0.145271	11	AP5Z1	0.960228	B	G	0.329018
602	-0.353043	0.286883	-1.10675	1.13203	11	APAF1	0.63409	A	G	0.0729332
603	0.276061	0.41124	0.850239	0.861667	11	APBA1	0.7117	B	G	0.156549
604	0.654478	0.0288869	2.34928	2.59685	11	APBA2	0.195117	A	G	0.296195
605	0.107504	0.753054	0.323762	0.324391	11	APBA3	0.910373	X	G	0.147995
606	0.14528	0.669955	0.438947	0.440515	11	APBB1	0.871874	B	G	-0.0627596
607	-0.490606	0.125473	-1.61058	1.68906	11	APBB1IP	0.434463	A	G	-0.121228
608	-0.820353	0.00198009	-3.47369	4.30363	11	APBB2	0.0404361	B	G	0.201667
609	0.720285	0.0124169	2.72471	3.11507	11	APBB3	0.118268	A	G	0.408165
610	-0.163517	0.630937	-0.494996	0.497245	11	APC	0.850908	D	G	-0.103788
611	-0.122566	0.719585	-0.369557	0.370492	11	APC2	0.896529	B	G	-0.1014
612	-0.821979	0.00190546	-3.48867	4.32987	11	APCDD1	0.0395954	C	G	-0.110155
613	-0.0265171	0.938313	-0.0795698	0.0795791	11	APCDD1L	0.978469	X	G	0.247912
614	0.123078	0.718456	0.371114	0.372062	11	APELA	0.895899	F	G	-0.0778662
615	0.423431	0.194392	1.35559	1.4022	11	APH1A	0.535167	D	G	0.119082
616	-0.410145	0.210255	-1.30736	1.34913	11	API5	0.55362	B	G	0.0920443
617	-0.191696	0.572305	-0.582293	0.585956	11	APIP	0.820973	A	G	0.0302766
618	-0.526119	0.0964269	-1.75429	1.85599	11	APLF	0.381892	H	G	0.113937
619	-0.0999103	0.770077	-0.300734	0.301238	11	APLN	0.917605	X	G	-0.134548
620	0.310641	0.352494	0.963764	0.980427	11	APLNR	0.68299	X	G	-0.0114724
621	-0.314488	0.346244	-0.976554	0.993891	11	APLP2	0.678094	A	G	0.0865359
622	0.784219	0.00427184	3.16871	3.79165	11	APMAP	0.0625841	B	G	0.112843
623	-0.679579	0.021433	-2.485	2.77908	11	APOA1	0.164473	C	G	-0.056216
624	0.157721	0.643253	0.477145	0.479159	11	APOA4	0.85814	X	G	-0.0836587
625	0.484542	0.130933	1.58671	1.66173	11	APOB	0.443686	C	G	0.241802
626	-0.532144	0.0919835	-1.77939	1.88558	11	APOBEC2	0.372996	L	G	-0.0603063
627	-0.142108	0.676822	-0.429228	0.430694	11	APOC3	0.875243	X	G	-0.0528408
628	-0.0206406	0.951968	-0.0619307	0.0619351	11	APOD	0.983362	A	G	-0.293728
629	-0.0821104	0.810326	-0.246887	0.247166	11	APOF	0.933706	C	G	0.0652943
630	0.263968	0.432842	0.811105	0.821023	11	APOH	0.728953	I	G	-0.410815
631	-0.0943596	0.782578	-0.283923	0.284347	11	APOLD1	0.922867	A	G	-0.133071
632	-0.314925	0.345537	-0.97801	0.995426	11	APOO	0.67745	B	G	-0.38442
633	0.0850725	0.803597	0.255836	0.256146	11	APOOL	0.930644	A	G	-0.239927
634	-0.0255503	0.940559	-0.0766675	0.0766758	11	APP	0.97944	A	G	0.152332
635	-0.22425	0.507395	-0.684381	0.690332	11	APPBP2	0.78143	B	G	-0.0668169
636	-0.287451	0.391387	-0.887357	0.900353	11	APPL1	0.696951	D	G	-0.122845
637	0.0651633	0.849035	0.195767	0.195906	11	APPL2	0.949483	C	G	0.0281869
638	-0.157046	0.644692	-0.475069	0.477057	11	APRT	0.858915	A	G	0.103362
639	0.292996	0.381899	0.905523	0.919336	11	APTX	0.695297	E	G	0.267373
640	-0.915886	7.5193e-05	-4.68864	6.84453	11	AQP1	0.00607433	B	G	-0.00694215
641	-0.145984	0.668434	-0.441105	0.442696	11	AQP10	0.870847	X	G	-0.0192319
642	0.775266	0.00505832	3.10018	3.68218	11	AQP11	0.069236	A	G	0.343195
643	NA	NA	NA	NA	11	AQP2	NA	X	G	-0.0575728
644	-0.849556	0.000931812	-3.76367	4.83161	11	AQP3	0.0258174	A	G	-0.206797
645	0.390978	0.234451	1.23886	1.27437	11	AQP4	0.581358	X	G	0.103146
646	-0.230437	0.495433	-0.703953	0.710431	11	AQP5	0.773014	X	G	0.0135579
647	0.34641	0.296665	1.08408	1.10782	11	AQP8	0.63409	X	G	-0.0859848
648	0.907431	0.00011427	4.53834	6.47854	11	AQP9	0.00771323	F	G	-0.0360129
649	-0.372115	0.259772	-1.17263	1.20271	11	AQR	0.609863	A	G	-0.319334
650	0.857543	0.000737862	3.85195	5.0011	11	AR	0.0223473	G	G	0.666925
651	0.05311	0.876755	0.15948	0.159555	11	ARAP1	0.957433	X	G	0.0191128
652	-0.295216	0.378134	-0.912812	0.926962	11	ARAP2	0.695297	X	G	0.185245
653	0.633661	0.03632	2.24253	2.45729	11	ARAP3	0.222398	D	G	-0.0468813
654	-0.750064	0.00784409	-2.91931	3.40235	11	ARC	0.088246	X	G	-0.162909
655	-0.529821	0.0936801	-1.76969	1.87413	11	ARCN1	0.376444	B	G	-0.0762948
656	-0.479074	0.135984	-1.56535	1.63735	11	AREG	0.451562	A	G	-0.19213
657	-0.74607	0.00837125	-2.8921	3.36135	11	AREL1	0.0925207	A	G	-0.309373
658	0.00770826	0.982055	0.0231252	0.0231255	11	ARF1	0.995224	B	G	0.110804
659	-0.41271	0.207134	-1.31662	1.3593	11	ARF3	0.549814	D	G	0.0174933
660	0.438632	0.177154	1.41161	1.46427	11	ARF4	0.515412	A	G	0.418315
661	0.23162	0.49316	0.707702	0.714284	11	ARF6	0.771598	D	G	-0.0167284
662	-0.667831	0.0247261	-2.42045	2.69174	11	ARFGAP1	0.178973	B	G	0.0556551
663	-0.463912	0.150626	-1.50686	1.57102	11	ARFGAP2	0.475419	B	G	-0.123495
664	-0.615121	0.0439809	-2.15135	2.34055	11	ARFGAP3	0.248854	A	G	-0.0940889
665	0.0879651	0.797037	0.264579	0.264922	11	ARFGEF1	0.92844	F	G	-0.00763554
666	0.335699	0.312842	1.04771	1.06914	11	ARFGEF2	0.648812	A	G	-0.235014
667	0.344669	0.299263	1.07814	1.1015	11	ARFGEF3	0.636493	F	G	0.165853
668	0.00777269	0.981905	0.0233185	0.0233188	11	ARFIP1	0.995224	A	G	0.0597525
669	-0.256485	0.446471	-0.787027	0.796086	11	ARFIP2	0.738174	D	G	-0.0298951
670	-0.2189	0.51784	-0.667501	0.673022	11	ARFRP1	0.789656	B	G	0.0100712
671	0.576198	0.0635539	1.97026	2.11498	11	ARG2	0.305177	C	G	0.0810042
672	-0.185115	0.585807	-0.561821	0.565111	11	ARGLU1	0.827378	A	G	0.0664298
673	-0.522668	0.0990338	-1.74001	1.83922	11	ARHGAP1	0.38726	X	G	0.037781
674	-0.62041	0.0416913	-2.17701	2.37318	11	ARHGAP10	0.240716	A	G	-0.110912
675	0.718089	0.0128167	2.71106	3.09543	11	ARHGAP12	0.120471	A	G	-0.000598139
676	0.427604	0.189563	1.37088	1.41909	11	ARHGAP15	0.529739	B	G	0.0573993
677	-0.206976	0.541438	-0.630031	0.634672	11	ARHGAP17	0.803884	X	G	-0.11464
678	0.510529	0.10857	1.69033	1.7812	11	ARHGAP18	0.404947	B	G	0.56257
679	0.850709	0.000901679	3.77614	4.85531	11	ARHGAP19	0.0252961	B	G	0.0555131
680	0.115868	0.734418	0.349173	0.349962	11	ARHGAP20	0.902984	A	G	-0.20356
681	0.500343	0.117015	1.64929	1.73364	11	ARHGAP21	0.418721	A	G	0.224541
682	-0.589862	0.0561197	-2.03236	2.19143	11	ARHGAP22	0.285222	F	G	-0.0458535
683	0.440299	0.175323	1.41781	1.47118	11	ARHGAP23	0.512218	B	G	0.1075
684	0.756396	0.00705871	2.96322	3.46911	11	ARHGAP24	0.0832274	G	G	0.638721
685	-0.0522997	0.878623	-0.157042	0.157114	11	ARHGAP25	0.957645	C	G	0.155456
686	-0.00416181	0.990311	-0.0124855	0.0124855	11	ARHGAP26	0.997301	D	G	0.250671
687	0.26713	0.427142	0.821311	0.831609	11	ARHGAP27	0.724013	B	G	-0.0145967
688	-0.449626	0.16529	-1.4527	1.51014	11	ARHGAP28	0.497733	X	G	-0.0262141
689	-0.28661	0.392837	-0.884607	0.897482	11	ARHGAP29	0.697926	A	G	-0.147075
690	0.169491	0.618333	0.513428	0.515938	11	ARHGAP30	0.845028	X	G	0.0730081
691	-0.535899	0.0892838	-1.79515	1.90422	11	ARHGAP31	0.367369	A	G	-0.300732
692	-0.649922	0.0304127	-2.32549	2.56548	11	ARHGAP32	0.199918	A	G	-0.168492
693	-0.0375711	0.912671	-0.112766	0.112793	11	ARHGAP35	0.968882	D	G	-0.0629769
694	0.455672	0.158981	1.47551	1.53572	11	ARHGAP36	0.48823	B	G	0.656014
695	-0.588326	0.0569244	-2.0253	2.18269	11	ARHGAP39	0.287048	X	G	-0.213494
696	0.425562	0.191916	1.3634	1.41082	11	ARHGAP40	0.532285	A	G	-0.117526
697	0.722738	0.0119812	2.74006	3.13724	11	ARHGAP42	0.11609	A	G	0.333685
698	0.466472	0.148088	1.51665	1.58209	11	ARHGAP44	0.471165	B	G	0.106275
699	0.00278883	0.993507	0.00836651	0.00836652	11	ARHGAP45	0.998531	X	G	-0.0453204
700	0.607595	0.0473867	2.1153	2.29498	11	ARHGAP5	0.259511	B	G	-0.29792
701	0.34761	0.294883	1.08817	1.11219	11	ARHGAP6	0.63409	A	G	-0.163525
702	-0.121911	0.721033	-0.367561	0.368481	11	ARHGDIA	0.897181	X	G	0.110344
703	-0.956589	4.06815e-06	-5.71237	9.84684	11	ARHGDIB	0.00141088	B	G	-0.233018
704	0.698682	0.0167636	2.59416	2.92976	11	ARHGDIG	0.142941	C	G	0.0992653
705	0.441971	0.173498	1.42403	1.47811	11	ARHGEF10	0.509228	A	G	-0.191816
706	0.609561	0.0464798	2.12467	2.30679	11	ARHGEF10L	0.256852	B	G	-0.103062
707	0.171756	0.613579	0.520425	0.523039	11	ARHGEF11	0.842581	B	G	-0.15748
708	0.365753	0.268647	1.15054	1.17895	11	ARHGEF12	0.620461	X	G	0.256396
709	-0.225675	0.504629	-0.688883	0.694953	11	ARHGEF16	0.779801	X	G	-0.0916865
710	-0.586599	0.0578382	-2.01739	2.17292	11	ARHGEF17	0.28991	D	G	-0.0190964
711	0.0452117	0.894988	0.135728	0.135774	11	ARHGEF18	0.96302	B	G	0.319492
712	-0.319611	0.338011	-0.993643	1.01191	11	ARHGEF2	0.670455	D	G	-0.149417
713	-0.152381	0.65467	-0.460731	0.462544	11	ARHGEF26	0.865195	C	G	-0.00514239
714	0.299527	0.370875	0.927	0.941822	11	ARHGEF28	0.695297	E	G	-0.20357
715	-0.557813	0.0745692	-1.88896	2.01627	11	ARHGEF3	0.333621	F	G	-0.317203
716	-0.262011	0.436387	-0.804799	0.814487	11	ARHGEF33	0.731249	X	G	-0.054637
717	0.0560128	0.870067	0.168215	0.168303	11	ARHGEF37	0.955368	X	G	-0.126478
718	0.0401049	0.906802	0.120379	0.120412	11	ARHGEF38	0.966904	A	G	-0.132677
719	-0.0273378	0.936407	-0.0820338	0.0820441	11	ARHGEF39	0.977819	E	G	0.14914
720	-0.97537	3.26329e-07	-6.57679	13.2657	11	ARHGEF4	0.00040458	B	G	-0.146402
721	-0.664932	0.0255908	-2.40481	2.67075	11	ARHGEF5	0.181701	A	G	-0.33865
722	-0.262698	0.435141	-0.807012	0.81678	11	ARHGEF6	0.73059	B	G	0.357338
723	-0.889953	0.000242459	-4.2651	5.85429	11	ARHGEF7	0.0123158	B	G	-0.191758
724	-0.957018	3.8928e-06	-5.72759	9.8992	11	ARHGEF9	0.00139828	A	G	-0.317701
725	-0.0127632	0.97029	-0.0382917	0.0382927	11	ARID1A	0.990715	B	G	-0.202194
726	0.33714	0.310638	1.05259	1.07432	11	ARID1B	0.646996	A	G	-0.00793562
727	-0.564511	0.0704185	-1.91829	2.05171	11	ARID2	0.323247	A	G	0.0279773
728	0.0731871	0.830666	0.219955	0.220152	11	ARID3A	0.942671	A	G	-0.189413
729	0.489339	0.126602	1.60557	1.68333	11	ARID3B	0.435952	A	G	-0.0449859
730	-0.00321484	0.992515	-0.00964456	0.00964458	11	ARID3C	0.998172	X	G	-0.00114994
731	-0.667259	0.0248952	-2.41736	2.68757	11	ARID4A	0.179487	A	G	-0.129741
732	0.190271	0.575219	0.577854	0.581433	11	ARID4B	0.821938	A	G	0.120103
733	0.357246	0.280778	1.12118	1.14746	11	ARID5A	0.631797	A	G	0.0491222
734	-0.516644	0.103695	-1.71525	1.81024	11	ARID5B	0.396007	X	G	0.0651423
735	-0.30232	0.366211	-0.936212	0.951482	11	ARIH1	0.695001	D	G	0.080905
736	-0.539441	0.0867858	-1.8101	1.92194	11	ARIH2	0.361502	B	G	-0.219553
737	0.760923	0.00653373	2.99521	3.51822	11	ARL1	0.0798119	C	G	0.173913
738	-0.128002	0.707612	-0.386123	0.38719	11	ARL11	0.890547	F	G	-0.0703526
739	-0.533491	0.0910091	-1.78504	1.89225	11	ARL13A	0.370343	X	G	-0.149531
740	-0.355171	0.283783	-1.11405	1.13983	11	ARL13B	0.63409	A	G	-0.197819
741	0.134714	0.692908	0.406615	0.407861	11	ARL14	0.883092	C	G	0.127912
742	0.509663	0.109272	1.68682	1.77712	11	ARL14EP	0.40621	A	G	0.0105079
743	0.174078	0.608717	0.527606	0.53033	11	ARL14EPL	0.839727	A	G	0.374186
744	0.329791	0.321964	1.02778	1.048	11	ARL15	0.657287	E	G	0.194723
745	0.0912619	0.789575	0.274549	0.274933	11	ARL16	0.925434	B	G	0.0701616
746	-0.177261	0.602076	-0.537459	0.540339	11	ARL2BP	0.836206	A	G	-0.116494
747	-0.141015	0.67919	-0.425885	0.427316	11	ARL3	0.876607	D	G	-0.116886
748	-0.284306	0.396821	-0.877081	0.889629	11	ARL4A	0.70135	A	G	-0.196984
749	-0.138781	0.684045	-0.419047	0.420411	11	ARL4C	0.87858	C	G	-0.118855
750	-0.424216	0.193477	-1.35847	1.40537	11	ARL5A	0.534166	B	G	0.11541
751	-0.766523	0.00592449	-3.03553	3.58068	11	ARL5B	0.0755682	B	G	-0.0227254
752	-0.328657	0.323731	-1.02397	1.04396	11	ARL6	0.658732	I	G	0.241211
753	0.329254	0.322801	1.02597	1.04609	11	ARL6IP1	0.657619	F	G	0.0501835
754	0.518236	0.10245	1.72177	1.81786	11	ARL6IP4	0.393732	B	G	-0.047825
755	-0.287012	0.392144	-0.885921	0.898854	11	ARL6IP5	0.697557	A	G	-0.21404
756	-0.059011	0.863167	-0.177239	0.177342	11	ARL8A	0.953517	D	G	-0.00750715
757	0.756795	0.00701123	2.96602	3.47339	11	ARL8B	0.0828618	A	G	0.348693
758	-0.12054	0.724064	-0.363387	0.364276	11	ARL9	0.898195	X	G	0.259758
759	-0.695246	0.0175436	-2.57412	2.90181	11	ARMC1	0.146042	B	G	0.0614023
760	0.0543724	0.873845	0.163278	0.163359	11	ARMC10	0.956442	K	G	-0.201253
761	0.744755	0.00855027	2.88322	3.34803	11	ARMC2	0.0937476	X	G	0.502646
762	0.174939	0.606918	0.53027	0.533036	11	ARMC3	0.839049	A	G	0.408685
763	-0.124501	0.715317	-0.375451	0.376432	11	ARMC4	0.894511	C	G	0.155497
764	0.281803	0.401172	0.868918	0.881118	11	ARMC6	0.705259	A	G	0.408904
765	0.0159253	0.962934	0.04778	0.047782	11	ARMC7	0.987827	X	G	0.110098
766	0.0226408	0.947319	0.067934	0.0679398	11	ARMC8	0.981738	A	G	-0.0419555
767	0.0418982	0.902652	0.125768	0.125805	11	ARMC9	0.965267	X	G	0.122642
768	-0.412761	0.207072	-1.3168	1.3595	11	ARMH3	0.549814	B	G	0.072781
769	-0.59986	0.0510716	-2.07879	2.24918	11	ARMH4	0.271057	F	G	-0.378557
770	0.396348	0.227516	1.25793	1.29511	11	ARMT1	0.57265	B	G	0.482231
771	-0.108729	0.750317	-0.327482	0.328132	11	ARNT	0.909402	A	G	-0.0456223
772	0.653033	0.0293648	2.3417	2.58685	11	ARNT2	0.196302	A	G	0.0586025
773	-0.752593	0.00752324	-2.93672	3.42874	11	ARNTL	0.0856908	B	G	-0.0226635
774	0.0922809	0.787272	0.277633	0.278029	11	ARNTL2	0.924484	X	G	0.485469
775	-0.771611	0.00540814	-3.07289	3.63914	11	ARPC1A	0.0722693	A	G	-0.288987
776	-0.329362	0.322632	-1.02634	1.04647	11	ARPC1B	0.657611	C	G	-0.0974155
777	-0.487408	0.128335	-1.59796	1.67461	11	ARPC2	0.438901	A	G	-0.280419
778	-0.0478004	0.889007	-0.143511	0.143565	11	ARPC3	0.960735	D	G	0.0363339
779	0.347071	0.295682	1.08633	1.11023	11	ARPC4	0.63409	H	G	0.287184
780	-0.771838	0.00538599	-3.07457	3.64178	11	ARPC5	0.072178	B	G	0.0347263
781	0.518878	0.10195	1.72441	1.82095	11	ARPC5L	0.393166	A	G	0.121348
782	-0.876933	0.000393295	-4.087	5.47384	11	ARPP19	0.0157632	A	G	-0.309735
783	-0.163687	0.630577	-0.49552	0.497776	11	ARPP21	0.850908	B	G	0.124604
784	0.362934	0.272634	1.14078	1.16847	11	ARR3	0.623611	X	G	0.235927
785	-0.666746	0.0250473	-2.41459	2.68386	11	ARRB1	0.17987	D	G	0.0478762
786	-0.792109	0.0036571	-3.2312	3.8932	11	ARRDC1	0.0573363	A	G	-0.342114
787	-0.84194	0.00115033	-3.6834	4.68115	11	ARRDC2	0.0291056	B	G	-0.0550682
788	0.193401	0.568827	0.587604	0.591368	11	ARRDC3	0.819536	E	G	0.262967
789	-0.232657	0.491172	-0.710989	0.717663	11	ARRDC4	0.770718	A	G	-0.12013
790	0.448314	0.16668	1.44777	1.50462	11	ARSA	0.49922	B	G	-0.236271
791	0.43832	0.177498	1.41045	1.46299	11	ARSB	0.515657	E	G	0.487465
792	0.288731	0.389187	0.891544	0.904725	11	ARSG	0.695297	C	G	0.0360334
793	-0.506592	0.111785	-1.6744	1.7627	11	ARSI	0.4095	F	G	-0.110976
794	-0.41509	0.204264	-1.32523	1.36876	11	ARSJ	0.546384	X	G	-0.0456524
795	0.00751047	0.982515	0.0225318	0.0225321	11	ARSK	0.995224	E	G	0.0051386
796	-0.275892	0.411538	-0.84969	0.861096	11	ARTN	0.711831	X	G	-0.0418439
797	-0.00642752	0.985036	-0.0192828	0.0192829	11	ARV1	0.996095	B	G	0.185206
798	-0.781091	0.00453552	-3.14449	3.75273	11	ARVCF	0.0651657	A	G	-0.225805
799	0.726968	0.0112559	2.7668	3.17605	11	ARX	0.111864	A	G	-0.13273
800	0.297981	0.37347	0.921908	0.936487	11	AS3MT	0.695297	X	G	0.0443631
801	0.816618	0.00215978	3.43975	4.24454	11	ASAH1	0.0421376	A	G	0.435822
802	-0.272612	0.417346	-0.83905	0.850032	11	ASAP1	0.716199	A	G	-0.189675
803	0.59458	0.0536971	2.05416	2.21848	11	ASAP2	0.278784	A	G	-0.0275451
804	-0.502796	0.114944	-1.65912	1.745	11	ASAP3	0.414913	C	G	-0.0872388
805	-0.143903	0.672932	-0.434728	0.436251	11	ASB1	0.873007	B	G	-0.0404637
806	0.551613	0.0785543	1.86209	1.98398	11	ASB10	0.342776	G	G	0.523671
807	0.42943	0.187473	1.37759	1.42652	11	ASB11	0.527046	X	G	-0.0291417
808	0.325291	0.329006	1.01266	1.032	11	ASB12	0.663124	X	G	-0.110146
809	0.0283234	0.934119	0.0849929	0.0850043	11	ASB13	0.977134	X	G	0.0657979
810	0.46811	0.146478	1.52294	1.5892	11	ASB14	0.469548	X	G	0.176843
811	0.869558	0.000505413	3.99379	5.28252	11	ASB15	0.018111	G	G	0.612338
812	-0.303202	0.364745	-0.939125	0.954538	11	ASB16	0.693391	X	G	-0.0997356
813	0.160184	0.638009	0.484728	0.48684	11	ASB2	0.855338	F	G	-0.0775013
814	-0.112693	0.741479	-0.33952	0.340245	11	ASB3	0.906083	X	G	0.060349
815	-0.406269	0.215023	-1.2934	1.33384	11	ASB4	0.559695	X	G	0.126411
816	0.497877	0.119122	1.63944	1.72227	11	ASB5	0.423022	A	G	0.235371
817	-0.10102	0.767584	-0.304096	0.304617	11	ASB6	0.916856	X	G	0.254273
818	-0.323895	0.331208	-1.00798	1.02705	11	ASB7	0.664364	D	G	-0.36348
819	0.129345	0.704661	0.390222	0.391324	11	ASB8	0.889181	D	G	0.0169498
820	0.12104	0.722957	0.364911	0.365811	11	ASCC1	0.897657	E	G	0.106493
821	-0.614415	0.0442928	-2.14795	2.33623	11	ASCC2	0.249566	B	G	0.0746583
822	-0.293079	0.381759	-0.905794	0.919619	11	ASCC3	0.695297	A	G	-0.159909
823	0.0618631	0.856611	0.185827	0.185945	11	ASCL1	0.951082	C	G	0.141508
824	-0.800696	0.00306533	-3.30164	4.00968	11	ASCL2	0.0517275	X	G	0.015103
825	-0.503731	0.114161	-1.66288	1.74935	11	ASCL3	0.413531	X	G	-0.144381
826	-0.00689222	0.983954	-0.020677	0.0206771	11	ASCL4	0.996072	X	G	0.134953
827	0.336669	0.311357	1.05099	1.07263	11	ASDURF	0.647916	E	G	0.155603
828	0.413112	0.206648	1.31807	1.36089	11	ASF1A	0.549108	X	G	0.0795503
829	-0.186849	0.582237	-0.567211	0.570596	11	ASH1L	0.824973	A	G	-0.130067
830	-0.146915	0.666426	-0.443957	0.445579	11	ASH2L	0.870296	D	G	0.0742885
831	-0.41938	0.19915	-1.34082	1.38591	11	ASIC1	0.540894	D	G	-0.128975
832	-0.644225	0.0323989	-2.29609	2.52692	11	ASIC3	0.207742	A	G	0.0764027
833	-0.851	0.000894194	-3.7793	4.86132	11	ASIC4	0.0252961	A	G	-0.32065
834	-0.208468	0.538463	-0.634706	0.639452	11	ASIC5	0.802571	X	G	-0.0292006
835	-0.0497542	0.884496	-0.149386	0.149448	11	ASIP	0.959195	J	G	-0.121705
836	0.301304	0.367904	0.932859	0.947965	11	ASMT	0.695297	C	G	-0.0705274
837	-0.201389	0.552645	-0.61254	0.616805	11	ASMTL	0.809293	A	G	-0.124373
838	0.526665	0.0960181	1.75656	1.85866	11	ASNS	0.381399	D	G	0.1177
839	0.399461	0.22355	1.26902	1.30721	11	ASPA	0.568773	X	G	0.16042
840	0.110846	0.745594	0.333909	0.334598	11	ASPDH	0.907094	X	G	-0.0790706
841	0.268559	0.424578	0.82593	0.836403	11	ASPG	0.722276	B	G	-0.00803808
842	0.275638	0.411987	0.848865	0.860237	11	ASPH	0.712196	C	G	0.2993
843	-0.612553	0.0451233	-2.13899	2.32489	11	ASPHD2	0.252127	X	G	-0.185225
844	0.542951	0.0843564	1.82499	1.93965	11	ASPM	0.356476	X	G	0.283242
845	-0.280585	0.403297	-0.864951	0.876984	11	ASPN	0.706658	X	G	-0.0983597
846	-0.226345	0.503331	-0.691001	0.697128	11	ASPSCR1	0.778808	A	G	-0.103945
847	-0.23987	0.477435	-0.73391	0.741252	11	ASRGL1	0.761665	B	G	0.124946
848	0.711537	0.0140645	2.67087	3.03795	11	ASS1	0.127709	A	G	0.100276
849	-0.0578819	0.865764	-0.17384	0.173937	11	ASTE1	0.954029	A	G	-0.0402135
850	-0.614898	0.0440795	-2.15028	2.33918	11	ASTN1	0.24899	A	G	-0.0704755
851	0.697568	0.0170136	2.58765	2.92066	11	ASTN2	0.143733	B	G	-0.201117
852	-0.174505	0.607825	-0.528927	0.531671	11	ASXL1	0.839274	B	G	0.225483
853	0.359429	0.277638	1.12869	1.1555	11	ASXL2	0.628215	X	G	-0.036752
854	-0.833337	0.00144113	-3.59688	4.52273	11	ASXL3	0.03332	C	G	0.271606
855	0.479395	0.135684	1.5666	1.63877	11	ASZ1	0.45127	K	G	0.276904
856	0.78539	0.00417613	3.17785	3.8064	11	ATAD1	0.061717	A	G	0.50516
857	0.526327	0.096271	1.75515	1.85701	11	ATAD2	0.381666	A	G	0.0306517
858	0.254482	0.450154	0.780597	0.789435	11	ATAD2B	0.741341	A	G	0.0112457
859	0.111617	0.743874	0.336253	0.336957	11	ATAD3A	0.906507	D	G	-0.059082
860	0.91532	7.74312e-05	4.67815	6.81842	11	ATAD5	0.00618067	A	G	0.268
861	-0.0654756	0.848319	-0.196708	0.196849	11	ATAT1	0.949372	D	G	0.181677
862	0.275188	0.412781	0.847406	0.85872	11	ATCAY	0.712956	A	G	0.154045
863	0.697735	0.0169759	2.58862	2.92202	11	ATE1	0.143535	F	G	0.112684
864	-0.798278	0.00322417	-3.28154	3.97622	11	ATF1	0.053433	B	G	-0.138769
865	-0.232901	0.490704	-0.711764	0.71846	11	ATF2	0.770291	B	G	0.188987
866	0.35994	0.276904	1.13045	1.1574	11	ATF3	0.627385	F	G	0.134694
867	-0.315258	0.345	-0.979119	0.996594	11	ATF4	0.67703	D	G	0.0421686
868	-0.244591	0.468541	-0.748955	0.756759	11	ATF6	0.755503	D	G	0.0252192
869	0.429473	0.187424	1.37775	1.42669	11	ATF7IP	0.526983	A	G	0.109351
870	-0.475861	0.139009	-1.55286	1.62314	11	ATG10	0.456393	F	G	-0.128539
871	0.348144	0.29409	1.08999	1.11413	11	ATG101	0.63409	D	G	0.117954
872	0.493023	0.123339	1.62014	1.70005	11	ATG12	0.430349	E	G	0.285767
873	-0.630817	0.0374297	-2.22832	2.43894	11	ATG13	0.22596	D	G	-0.0483071
874	-0.251103	0.456397	-0.769768	0.778243	11	ATG14	0.745534	C	G	-0.367259
875	-0.257892	0.443893	-0.791548	0.800764	11	ATG16L1	0.736094	X	G	-0.0980984
876	0.31052	0.352691	0.963362	0.980004	11	ATG2B	0.68299	A	G	-0.140726
877	0.812416	0.00237623	3.40228	4.17996	11	ATG3	0.0445548	G	G	0.512079
878	-0.622258	0.0409114	-2.18604	2.3847	11	ATG4A	0.238255	B	G	-0.181374
879	0.172296	0.612446	0.522096	0.524735	11	ATG4B	0.842037	X	G	-0.0226738
880	-0.453613	0.161113	-1.46772	1.52698	11	ATG4C	0.491367	B	G	-0.248175
881	-0.3496	0.291938	-1.09496	1.11944	11	ATG4D	0.63409	D	G	-0.0918816
882	0.613651	0.0446324	2.14427	2.33157	11	ATG5	0.250322	B	G	0.510243
883	-0.362218	0.273652	-1.13831	1.16582	11	ATG7	0.624161	B	G	-0.118327
884	-0.27481	0.413449	-0.84618	0.857444	11	ATG9A	0.713681	F	G	-0.0529147
885	0.127362	0.709018	0.384173	0.385224	11	ATG9B	0.891286	X	G	-0.218633
886	0.452291	0.162491	1.46273	1.52138	11	ATIC	0.494072	X	G	-0.0467263
887	-0.328122	0.324567	-1.02217	1.04206	11	ATL1	0.659294	A	G	0.00593477
888	0.686813	0.019568	2.5257	2.83482	11	ATL2	0.156133	A	G	-0.096529
889	0.0825614	0.809301	0.248249	0.248533	11	ATM	0.933387	D	G	-0.0427831
890	-0.422364	0.195638	-1.3517	1.3979	11	ATMIN	0.536473	B	G	0.190622
891	0.0301937	0.929777	0.0906086	0.0906224	11	ATN1	0.975154	B	G	0.0627781
892	NA	NA	NA	NA	11	ATOH1	NA	X	G	-0.0108399
893	0.440139	0.175499	1.41721	1.47051	11	ATOH7	0.51252	X	G	0.121514
894	0.112657	0.741558	0.339411	0.340136	11	ATOH8	0.906083	X	G	0.212137
895	-0.234611	0.487433	-0.717191	0.724042	11	ATOX1	0.768346	H	G	-0.0553546
896	0.2174	0.520784	0.662776	0.668181	11	ATP10A	0.791326	C	G	-0.0789414
897	-0.404614	0.217077	-1.28746	1.32735	11	ATP10B	0.56222	X	G	-0.0944767
898	0.474218	0.140571	1.54649	1.6159	11	ATP10D	0.459321	A	G	-0.0328521
899	0.437717	0.178164	1.40821	1.4605	11	ATP11A	0.516691	A	G	-0.0454216
900	0.87447	0.000428388	4.0553	5.4082	11	ATP11B	0.016657	G	G	0.616121
901	0.826082	0.00172648	3.52702	4.39756	11	ATP11C	0.037262	A	G	0.080786
902	-0.896541	0.000185463	-4.36292	6.07193	11	ATP12A	0.010487	B	G	-0.150104
903	-0.383871	0.243815	-1.21377	1.24716	11	ATP13A1	0.592957	B	G	-0.0344149
904	0.44603	0.169115	1.4392	1.49504	11	ATP13A2	0.503292	X	G	-0.131821
905	-0.220113	0.515463	-0.671326	0.676943	11	ATP13A3	0.787284	D	G	-0.149599
906	-0.290377	0.386366	-0.896934	0.910357	11	ATP13A4	0.695297	B	G	0.190124
907	-0.617719	0.0428458	-2.16392	2.35651	11	ATP1A1	0.244981	B	G	0.172798
908	0.697959	0.0169256	2.58993	2.92384	11	ATP1B1	0.143351	B	G	-0.0574643
909	0.671728	0.0235967	2.44166	2.72029	11	ATP1B3	0.174182	A	G	0.381417
910	-0.444596	0.170656	-1.43383	1.48905	11	ATP1B4	0.505915	X	G	-0.154203
911	-0.0518201	0.879729	-0.1556	0.155669	11	ATP23	0.957645	X	G	-0.113275
912	0.531361	0.0925532	1.77612	1.88171	11	ATP2A1	0.374108	C	G	0.115143
913	-0.322652	0.333173	-1.00382	1.02265	11	ATP2A2	0.666188	A	G	-0.433411
914	0.517803	0.102787	1.72	1.81579	11	ATP2A3	0.394271	B	G	0.712146
915	-0.125808	0.712438	-0.379433	0.380446	11	ATP2B1	0.892767	F	G	0.183769
916	0.195455	0.564649	0.594007	0.597896	11	ATP2B2	0.81741	A	G	-0.384785
917	-0.68656	0.0196313	-2.52426	2.83284	11	ATP2B4	0.156266	A	G	0.169185
918	-0.647339	0.0313023	-2.31211	2.5479	11	ATP2C1	0.203835	A	G	-0.176455
919	-0.26985	0.422268	-0.830106	0.840739	11	ATP2C2	0.72029	X	G	0.0462172
920	0.445756	0.169409	1.43817	1.4939	11	ATP4A	0.503831	D	G	-0.0785747
921	0.342245	0.3029	1.0699	1.09272	11	ATP4B	0.640339	E	G	0.0123699
922	0.763436	0.00625487	3.0132	3.54601	11	ATP5F1A	0.0780501	E	G	0.151522
923	0.414252	0.205272	1.3222	1.36542	11	ATP5F1B	0.547729	D	G	-0.207079
924	0.221637	0.512486	0.67613	0.681868	11	ATP5F1C	0.784943	D	G	-0.229743
925	0.555207	0.0762274	1.87763	2.00264	11	ATP5F1D	0.337066	D	G	-0.103633
926	0.391282	0.234054	1.23994	1.27554	11	ATP5F1E	0.58075	H	G	-0.0316251
927	0.404946	0.216664	1.28865	1.32865	11	ATP5IF1	0.561624	D	G	-0.00189352
928	0.362303	0.27353	1.1386	1.16614	11	ATP5MC1	0.624161	D	G	-0.227822
929	0.701541	0.0161336	2.61099	2.95332	11	ATP5MC3	0.138971	B	G	-0.12253
930	0.476185	0.138701	1.55412	1.62457	11	ATP5MD	0.456189	H	G	-0.112881
931	0.594433	0.0537711	2.05348	2.21764	11	ATP5ME	0.278784	E	G	0.014199
932	-0.477095	0.137842	-1.55765	1.62858	11	ATP5MF	0.454837	H	G	-0.386818
933	0.267533	0.426417	0.822615	0.832962	11	ATP5MG	0.723769	H	G	-0.146612
934	0.549039	0.08025	1.85101	1.97071	11	ATP5MPL	0.346544	H	G	-0.014344
935	0.338038	0.30927	1.05563	1.07755	11	ATP5PB	0.646203	D	G	-0.204026
936	0.456967	0.15765	1.48041	1.54123	11	ATP5PD	0.485996	B	G	-0.312354
937	0.444019	0.171278	1.43168	1.48664	11	ATP5PF	0.507029	H	G	0.0130123
938	0.515172	0.104855	1.70924	1.80322	11	ATP5PO	0.39797	B	G	-0.249231
939	0.791546	0.00369866	3.22667	3.88578	11	ATP6AP1	0.057718	X	G	0.385232
940	-0.0318228	0.925997	-0.0955006	0.0955167	11	ATP6AP1L	0.973772	E	G	-0.0433633
941	-0.76169	0.00644766	-3.00068	3.52666	11	ATP6AP2	0.079324	A	G	-0.0424125
942	-0.508056	0.110583	-1.68032	1.76956	11	ATP6V0A1	0.407693	B	G	0.0178475
943	-0.337438	0.310184	-1.0536	1.07539	11	ATP6V0A2	0.646899	B	G	0.00616317
944	0.0584696	0.864412	0.175609	0.175709	11	ATP6V0A4	0.953898	X	G	-0.00588363
945	-0.731825	0.010463	-2.79794	3.22157	11	ATP6V0B	0.10678	A	G	-0.157657
946	0.509279	0.109584	1.68527	1.77531	11	ATP6V0C	0.40641	A	G	0.25848
947	0.149181	0.661545	0.450907	0.452606	11	ATP6V0D1	0.867809	A	G	0.207735
948	0.632079	0.0369344	2.23461	2.44706	11	ATP6V0D2	0.224277	X	G	-0.0350839
949	0.601463	0.0502923	2.08631	2.25859	11	ATP6V0E1	0.268979	I	G	-0.0566395
950	-0.285326	0.395054	-0.880412	0.893104	11	ATP6V1A	0.699721	A	G	0.0920445
951	-0.114988	0.736372	-0.346497	0.347268	11	ATP6V1B1	0.90395	X	G	-0.0194654
952	0.0657141	0.847772	0.197427	0.197569	11	ATP6V1B2	0.94902	A	G	0.168904
953	-0.343439	0.301106	-1.07396	1.09704	11	ATP6V1C1	0.638291	A	G	-0.000374687
954	-0.68712	0.0194916	-2.52744	2.83721	11	ATP6V1C2	0.155709	X	G	-0.215638
955	0.591162	0.0554446	2.03835	2.19885	11	ATP6V1D	0.28346	A	G	0.343937
956	0.54135	0.0854587	1.81819	1.93156	11	ATP6V1E1	0.358873	A	G	0.236407
957	0.365527	0.268966	1.14975	1.1781	11	ATP6V1F	0.621011	D	G	0.0200893
958	-0.402915	0.219199	-1.28137	1.32069	11	ATP6V1G1	0.564413	A	G	-0.000183916
959	0.36851	0.26478	1.16009	1.18922	11	ATP6V1G3	0.616155	X	G	0.0235367
960	0.0869884	0.799251	0.261626	0.261958	11	ATP6V1H	0.928883	B	G	0.0464613
961	0.306284	0.359642	0.949319	0.965241	11	ATP7A	0.689103	A	G	-0.135703
962	0.731957	0.0104421	2.79879	3.22282	11	ATP7B	0.106621	A	G	-0.184392
963	-0.764939	0.00609235	-3.02404	3.56282	11	ATP8A1	0.0768806	B	G	0.444658
964	0.798621	0.00320129	3.28438	3.98093	11	ATP8A2	0.0532622	F	G	0.271872
965	0.350459	0.290672	1.0979	1.12257	11	ATP8B2	0.63409	D	G	-0.0328009
966	-0.355286	0.283616	-1.11444	1.14025	11	ATP8B3	0.63409	X	G	0.0100805
967	-0.197253	0.561002	-0.599617	0.603617	11	ATP9A	0.815181	X	G	0.20117
968	-0.100089	0.769675	-0.301276	0.301783	11	ATP9B	0.917507	D	G	-0.0464985
969	-0.666532	0.0251109	-2.41343	2.68231	11	ATPAF1	0.17987	X	G	-0.223403
970	0.359659	0.277307	1.12948	1.15636	11	ATPAF2	0.627842	A	G	0.195234
971	0.824996	0.00177259	3.51678	4.37943	11	ATPSCKMT	0.037509	A	G	0.641517
972	0.207831	0.539731	0.632711	0.637412	11	ATR	0.803296	A	G	0.0153211
973	-0.0751211	0.826249	-0.225789	0.226002	11	ATRAID	0.940417	D	G	-0.0656958
974	0.189703	0.576381	0.576087	0.579635	11	ATRIP	0.822846	A	G	0.0873102
975	-0.846603	0.00101244	-3.73211	4.77207	11	ATRN	0.0266712	X	G	-0.0833385
976	-0.426892	0.190382	-1.36827	1.4162	11	ATRNL1	0.530606	B	G	0.406656
977	-0.103405	0.762231	-0.311327	0.311886	11	ATRX	0.914541	A	G	-0.0896493
978	-0.438671	0.177111	-1.41175	1.46444	11	ATXN1	0.515412	A	G	-0.40733
979	-0.123891	0.716661	-0.373593	0.37456	11	ATXN10	0.895214	X	G	0.150306
980	-0.916886	7.13594e-05	-4.70736	6.8913	11	ATXN1L	0.00581131	B	G	-0.131659
981	0.357545	0.280347	1.1222	1.14856	11	ATXN2	0.631608	B	G	0.0316072
982	0.316737	0.342618	0.984047	1.00179	11	ATXN3	0.674719	D	G	0.202283
983	0.117064	0.731763	0.35281	0.353624	11	ATXN7	0.902392	A	G	0.0172257
984	0.553714	0.0771882	1.87117	1.99487	11	ATXN7L1	0.339502	A	G	-0.0861345
985	0.372143	0.259732	1.17273	1.20282	11	ATXN7L2	0.609863	X	G	-0.0777636
986	0.164495	0.628869	0.498009	0.500299	11	ATXN7L3	0.85	A	G	-0.0232692
987	0.751429	0.00766966	2.92869	3.41655	11	AUH	0.0869156	B	G	-0.126476
988	0.461788	0.152754	1.49874	1.56187	11	AUP1	0.478978	D	G	-0.00688466
989	0.43822	0.177609	1.41008	1.46257	11	AURKA	0.51569	X	G	0.238585
990	-0.3072	0.358133	-0.952352	0.968429	11	AURKAIP1	0.687981	X	G	0.13552
991	-0.741858	0.00895471	-2.8638	3.31899	11	AUTS2	0.0964757	A	G	-0.169682
992	0.782304	0.00443189	3.15384	3.76773	11	AVEN	0.0642736	A	G	0.689649
993	0.0493093	0.885523	0.148048	0.148108	11	AVL9	0.959455	B	G	0.294852
994	0.703285	0.0157577	2.62132	2.96783	11	AVPI1	0.137037	A	G	0.297931
995	-0.508504	0.110216	-1.68213	1.77167	11	AVPR1A	0.407312	X	G	-0.10469
996	NA	NA	NA	NA	11	AVPR1B	NA	X	G	-0.0557091
997	-0.242183	0.473069	-0.741275	0.748841	11	AXIN1	0.758471	C	G	-0.141229
998	0.42481	0.192788	1.36064	1.40777	11	AXIN2	0.532981	X	G	0.165255
999	-0.226917	0.502224	-0.69281	0.698984	11	AZI2	0.777873	B	G	-0.010789
1000	0.74653	0.00830925	2.89521	3.36603	11	AZIN1	0.0919365	G	G	0.554197
1001	-0.662319	0.0263885	-2.3908	2.65202	11	AZIN2	0.184756	B	G	-0.245664
1002	0.130953	0.701136	0.395127	0.396271	11	B2M	0.887897	C	G	0.0514909
1003	0.632422	0.0368005	2.23633	2.44927	11	B3GALNT1	0.223934	B	G	-0.136994
1004	-0.165566	0.626605	-0.501312	0.503648	11	B3GALNT2	0.848383	A	G	0.205912
1005	-0.437344	0.178577	-1.40683	1.45896	11	B3GALT1	0.517153	C	G	-0.0687078
1006	-0.33012	0.321451	-1.02889	1.04918	11	B3GALT2	0.657034	B	G	0.313697
1007	0.543707	0.0838384	1.82821	1.94349	11	B3GALT5	0.355542	A	G	-0.163222
1008	0.783642	0.0043196	3.16422	3.78441	11	B3GALT6	0.0631459	X	G	0.353825
1009	0.505618	0.112591	1.67047	1.75814	11	B3GAT1	0.410714	X	G	-0.151064
1010	-0.838372	0.00126497	-3.64701	4.61406	11	B3GAT2	0.0308798	X	G	-0.0902157
1011	0.340951	0.304852	1.0655	1.08805	11	B3GLCT	0.642726	A	G	0.219766
1012	-0.930158	3.32598e-05	-4.97869	7.6002	11	B3GNT2	0.00372611	B	G	-0.277199
1013	0.357345	0.280636	1.12152	1.14782	11	B3GNT4	0.631795	X	G	0.0507351
1014	0.721267	0.0122412	2.73084	3.12391	11	B3GNT5	0.117391	A	G	0.0865192
1015	-0.806235	0.00272339	-3.34853	4.08844	11	B3GNT7	0.0483077	C	G	-0.217372
1016	-0.488849	0.12704	-1.60364	1.68111	11	B3GNT9	0.436152	C	G	-0.119235
1017	0.374901	0.255938	1.18234	1.21319	11	B3GNTL1	0.60721	A	G	-0.0688434
1018	-0.63275	0.036673	-2.23797	2.45139	11	B4GALNT3	0.223471	A	G	-0.279764
1019	-0.278519	0.406914	-0.858229	0.869983	11	B4GALNT4	0.708972	D	G	-0.0349579
1020	0.754277	0.0073148	2.94841	3.44652	11	B4GALT1	0.0847522	C	G	0.176552
1021	-0.656127	0.0283481	-2.35795	2.60833	11	B4GALT2	0.192903	D	G	0.0255199
1022	0.0906086	0.791052	0.272573	0.272949	11	B4GALT3	0.925604	D	G	-0.00261965
1023	-0.819614	0.00201474	-3.46692	4.2918	11	B4GALT4	0.0404456	A	G	-0.346104
1024	0.850385	0.000910065	3.77263	4.84863	11	B4GALT5	0.0254603	C	G	0.234254
1025	-0.306119	0.359914	-0.948773	0.964668	11	B4GALT6	0.689296	A	G	-0.246346
1026	0.474578	0.140228	1.54789	1.61749	11	B4GALT7	0.458722	A	G	-0.000942491
1027	0.456353	0.15828	1.47809	1.53862	11	B4GAT1	0.487146	D	G	-0.0022047
1028	-0.40841	0.212381	-1.30111	1.34228	11	B9D1	0.556399	X	G	0.0785375
1029	-0.908815	0.000106998	-4.56203	6.53513	11	BAALC	0.00734558	B	G	-0.0268383
1030	-0.00150594	0.996494	-0.00451782	0.00451782	11	BABAM1	0.998967	D	G	0.19277
1031	0.350978	0.289909	1.09968	1.12447	11	BABAM2	0.63409	B	G	0.408297
1032	-0.0307814	0.928414	-0.0923733	0.0923879	11	BACE1	0.974595	D	G	0.268591
1033	0.937098	2.0981e-05	5.14105	8.05375	11	BACE2	0.00296321	B	G	0.345993
1034	-0.479013	0.136041	-1.56511	1.63708	11	BACH1	0.451562	A	G	-0.258958
1035	0.0787129	0.818058	0.236628	0.236874	11	BACH2	0.936528	C	G	0.218378
1036	0.19879	0.55789	0.604417	0.608515	11	BAG1	0.812831	X	G	0.217468
1037	0.673811	0.0230082	2.45307	2.73572	11	BAG2	0.171394	C	G	0.20349
1038	-0.172936	0.611105	-0.524076	0.526746	11	BAG3	0.841078	C	G	-0.148498
1039	-0.450972	0.163873	-1.45776	1.51581	11	BAG4	0.496155	B	G	-0.12404
1040	0.815519	0.00221489	3.42987	4.22746	11	BAG5	0.0427568	F	G	0.432715
1041	-0.124235	0.715904	-0.37464	0.375615	11	BAHCC1	0.894864	B	G	-0.0275116
1042	-0.77196	0.00537401	-3.07548	3.64321	11	BAHD1	0.0721525	C	G	0.0580436
1043	-0.797064	0.00330619	-3.27153	3.95962	11	BAIAP2	0.0543333	B	G	-0.135738
1044	-0.0399486	0.907164	-0.119909	0.119941	11	BAIAP2L1	0.96712	X	G	-0.135908
1045	-0.185342	0.585339	-0.562526	0.565828	11	BAIAP2L2	0.826949	X	G	-0.0334975
1046	-0.4053	0.216225	-1.28992	1.33004	11	BAK1	0.56093	X	G	0.00506356
1047	-0.820192	0.00198762	-3.47221	4.30104	11	BAMBI	0.0404456	A	G	-0.0165114
1048	-0.237675	0.481598	-0.726924	0.734058	11	BANK1	0.765133	B	G	0.492345
1049	-0.356277	0.282179	-1.11785	1.14389	11	BANP	0.633203	X	G	-0.131714
1050	-0.719873	0.0124913	-2.72214	3.11137	11	BAP1	0.118464	B	G	-0.11428
1051	-0.654562	0.028859	-2.34972	2.59744	11	BARD1	0.19507	B	G	0.428571
1052	0.619925	0.0418976	2.17465	2.37017	11	BARHL1	0.241274	X	G	-0.0023912
1053	0.505087	0.113031	1.66834	1.75567	11	BARHL2	0.41144	X	G	-0.00738466
1054	0.80251	0.00294999	3.31687	4.03516	11	BARX1	0.0506739	G	G	0.805189
1055	-0.545233	0.0828008	-1.83472	1.95125	11	BARX2	0.353291	B	G	0.401989
1056	-0.0702981	0.837271	-0.211243	0.211417	11	BASP1	0.945002	F	G	0.0770028
1057	0.333047	0.316919	1.03875	1.05963	11	BATF	0.653092	A	G	-0.00814347
1058	-0.181176	0.593946	-0.549594	0.552673	11	BATF3	0.831877	C	G	0.107401
1059	-0.888331	0.00025834	-4.24186	5.8035	11	BAZ1A	0.0126405	A	G	-0.310353
1060	0.251388	0.455869	0.770681	0.779186	11	BAZ1B	0.745331	A	G	-0.108713
1061	-0.0377241	0.912316	-0.113226	0.113253	11	BAZ2A	0.968882	B	G	-0.115997
1062	-0.0523123	0.878594	-0.15708	0.157152	11	BAZ2B	0.957645	A	G	-0.0801203
1063	-0.168557	0.620297	-0.510544	0.513012	11	BBIP1	0.845745	A	G	-0.0298457
1064	0.0795473	0.816158	0.239147	0.2394	11	BBOX1	0.935922	X	G	-0.0415754
1065	-0.303698	0.36392	-0.940765	0.95626	11	BBS10	0.692628	A	G	-0.258165
1066	-0.610826	0.0459033	-2.13071	2.31442	11	BBS12	0.254575	E	G	-0.0238683
1067	-0.0260948	0.939294	-0.0783023	0.0783112	11	BBS2	0.978756	A	G	-0.183826
1068	-0.660081	0.0270854	-2.37887	2.63612	11	BBS4	0.187859	B	G	0.185825
1069	0.788866	0.00390121	3.20527	3.85086	11	BBS5	0.0594733	G	G	0.561525
1070	-0.551328	0.0787409	-1.86086	1.98251	11	BBS7	0.343111	A	G	-0.161442
1071	0.554299	0.0768111	1.8737	1.99791	11	BBS9	0.338633	A	G	0.272644
1072	-0.841039	0.00117851	-3.67414	4.66402	11	BBX	0.0295583	B	G	-0.478346
1073	0.685018	0.0200196	2.51552	2.82084	11	BCAN	0.158167	X	G	-0.153876
1074	0.935953	2.27173e-05	5.1131	7.97402	11	BCAP29	0.00304184	G	G	0.796346
1075	-0.42339	0.19444	-1.35545	1.40204	11	BCAR1	0.535167	H	G	-0.204166
1076	0.676152	0.0223593	2.46597	2.7532	11	BCAR3	0.168134	X	G	0.258001
1077	-0.626571	0.03913	-2.20725	2.41185	11	BCAS1	0.232046	I	G	-0.209616
1078	0.46795	0.146634	1.52233	1.58851	11	BCAS2	0.469757	X	G	0.335657
1079	-0.294271	0.379735	-0.909708	0.923713	11	BCAS3	0.695297	B	G	0.175164
1080	0.429656	0.187215	1.37842	1.42744	11	BCAT1	0.526764	C	G	0.198415
1081	-0.0356234	0.917184	-0.106915	0.106938	11	BCCIP	0.970967	A	G	-0.0642385
1082	0.0509147	0.881818	0.152876	0.152942	11	BCDIN3D	0.958161	D	G	0.17138
1083	-0.532458	0.091756	-1.78071	1.88713	11	BCHE	0.372548	A	G	-0.381961
1084	0.199045	0.557374	0.605214	0.609327	11	BCKDHB	0.812375	X	G	-0.0183863
1085	-0.0121929	0.971617	-0.0365804	0.0365813	11	BCKDK	0.990939	X	G	-0.00807263
1086	-0.554644	0.0765888	-1.87519	1.99971	11	BCL10	0.337945	B	G	0.0714061
1087	-0.653419	0.0292364	-2.34373	2.58952	11	BCL11A	0.196122	A	G	-0.270478
1088	-0.456361	0.158272	-1.47812	1.53865	11	BCL11B	0.487146	A	G	-0.207411
1089	-0.571813	0.0660737	-1.95064	2.09102	11	BCL2	0.311843	A	G	-0.380935
1090	0.128346	0.706857	0.387172	0.388248	11	BCL2A1	0.890154	C	G	0.0526091
1091	-0.0862237	0.800985	-0.259315	0.259638	11	BCL2L1	0.929813	D	G	0.124998
1092	0.112735	0.741383	0.33965	0.340376	11	BCL2L10	0.906083	B	G	0.44818
1093	0.0811597	0.812488	0.244016	0.244285	11	BCL2L11	0.934649	A	G	0.146833
1094	-0.801663	0.00300345	-3.30975	4.02322	11	BCL2L13	0.0510256	X	G	-0.187009
1095	-0.211589	0.532258	-0.644501	0.649471	11	BCL2L14	0.799579	X	G	0.070545
1096	0.0558391	0.870467	0.167692	0.167779	11	BCL6	0.955591	X	G	0.108909
1097	-0.481829	0.133424	-1.57609	1.6496	11	BCL7A	0.447923	D	G	0.094414
1098	-0.467179	0.147392	-1.51937	1.58516	11	BCL7B	0.470661	D	G	-0.181277
1099	0.372717	0.25894	1.17472	1.20497	11	BCL9	0.609263	C	G	0.366687
1100	-0.124712	0.714851	-0.376095	0.377081	11	BCL9L	0.894175	X	G	0.328936
1101	0.0120096	0.972044	0.0360305	0.0360314	11	BCLAF1	0.991128	A	G	0.121238
1102	0.563774	0.0708678	1.91504	2.04778	11	BCLAF3	0.324643	A	G	0.300405
1103	-0.593675	0.0541559	-2.04997	2.21327	11	BCO1	0.279894	C	G	0.0691873
1104	-0.16023	0.637912	-0.484867	0.486981	11	BCO2	0.855326	X	G	-0.149534
1105	-0.215414	0.524693	-0.656525	0.661778	11	BCOR	0.794744	X	G	-0.0810065
1106	-0.0512617	0.881017	-0.15392	0.153988	11	BCORL1	0.957918	D	G	0.155984
1107	-0.854278	0.000813037	-3.81533	4.93027	11	BCR	0.0239447	A	G	-0.289971
1108	-0.838148	0.00127246	-3.64475	4.60991	11	BDH1	0.0309125	B	G	-0.274717
1109	0.288308	0.389914	0.89016	0.903279	11	BDH2	0.695917	X	G	0.297076
1110	-0.326105	0.327726	-1.01539	1.03489	11	BDKRB1	0.661807	A	G	-0.0344358
1111	-0.434747	0.181467	-1.39721	1.44827	11	BDKRB2	0.519929	X	G	-0.0891366
1112	-0.74443	0.00859509	-2.88103	3.34474	11	BDNF	0.0940643	B	G	0.156386
1113	0.787155	0.00403482	3.19172	3.82885	11	BDP1	0.0606128	E	G	0.132001
1114	-0.469637	0.144986	-1.52882	1.59585	11	BEAN1	0.466998	A	G	-0.228595
1115	-0.291268	0.384844	-0.899854	0.913408	11	BECN1	0.695297	A	G	-0.0607406
1116	0.673597	0.0230681	2.4519	2.73413	11	BEGAIN	0.171603	A	G	-0.0249661
1117	-0.386173	0.240759	-1.22188	1.25595	11	BEND2	0.589228	A	G	-0.0721152
1118	0.464392	0.150149	1.50869	1.57309	11	BEND3	0.474644	A	G	-0.106989
1119	0.307278	0.358005	0.952611	0.9687	11	BEND4	0.6878	C	G	-0.190885
1120	-0.75512	0.00721219	-2.95429	3.45547	11	BEND5	0.0843539	X	G	-0.123465
1121	0.678148	0.0218164	2.47703	2.76824	11	BEND6	0.165661	B	G	-0.323078
1122	0.0715167	0.834484	0.214917	0.215101	11	BEND7	0.943862	B	G	-0.315899
1123	-0.0780431	0.819584	-0.234607	0.234846	11	BEST3	0.937394	B	G	-0.128982
1124	-0.480432	0.134718	-1.57064	1.64338	11	BET1	0.44996	X	G	-0.0248405
1125	-0.421573	0.196565	-1.34881	1.39471	11	BET1L	0.537654	D	G	0.0523959
1126	-0.531336	0.0925713	-1.77602	1.88159	11	BFAR	0.374108	A	G	-0.302807
1127	0.109375	0.748874	0.329444	0.330106	11	BFSP1	0.90865	A	G	0.072393
1128	-0.528325	0.0947839	-1.76346	1.86678	11	BFSP2	0.378891	X	G	-0.117834
1129	0.63748	0.0348663	2.26175	2.48218	11	BGLAP	0.217199	X	G	0.0564953
1130	0.443037	0.17234	1.42801	1.48255	11	BHLHA15	0.507878	G	G	0.355145
1131	0.34641	0.296665	1.08408	1.10782	11	BHLHA9	0.63409	X	G	0.045493
1132	-0.919133	6.32896e-05	-4.75023	6.9994	11	BHLHE22	0.00546382	B	G	-0.00305736
1133	-0.607801	0.047291	-2.11628	2.29622	11	BHLHE23	0.259269	A	G	0.136414
1134	-0.329819	0.32192	-1.02788	1.04811	11	BHLHE40	0.657287	A	G	0.149063
1135	0.653824	0.0291023	2.34585	2.59232	11	BHLHE41	0.195858	A	G	0.386219
1136	0.133708	0.695107	0.40354	0.404758	11	BICC1	0.88427	X	G	-0.047577
1137	0.871635	0.000471657	4.01954	5.33486	11	BICD1	0.0175176	A	G	0.536756
1138	0.319126	0.338787	0.99202	1.0102	11	BICD2	0.671543	A	G	-0.200218
1139	-0.905659	0.000124123	-4.5085	6.40785	11	BICDL1	0.00815923	X	G	-0.127689
1140	-0.545816	0.082407	-1.83721	1.95421	11	BICRAL	0.352534	A	G	-0.0268322
1141	0.0583525	0.864681	0.175257	0.175356	11	BID	0.953944	A	G	0.0702948
1142	-0.0269273	0.937361	-0.0808013	0.0808111	11	BIN1	0.978058	A	G	0.0529902
1143	0.356513	0.281838	1.11866	1.14476	11	BIN2	0.632719	C	G	0.122884
1144	7.40131e-05	0.999828	0.000222039	0.000222039	11	BIN3	0.99992	B	G	-0.0864734
1145	-0.710205	0.0143286	-2.66279	3.02646	11	BIRC2	0.129363	B	G	-0.169064
1146	0.51597	0.104225	1.7125	1.80703	11	BIRC5	0.396485	X	G	0.526488
1147	0.439322	0.176394	1.41417	1.46713	11	BIRC6	0.514377	A	G	-0.0136583
1148	-0.0348612	0.918951	-0.104626	0.104647	11	BIRC7	0.971549	F	G	0.258036
1149	-0.13133	0.700309	-0.39628	0.397433	11	BIVM	0.887456	X	G	0.173833
1150	-0.700912	0.0162707	-2.60727	2.94812	11	BLCAP	0.139708	D	G	-0.102969
1151	-0.194824	0.565932	-0.592039	0.595889	11	BLK	0.817737	F	G	-0.0794349
1152	-0.0272652	0.936576	-0.0818159	0.081826	11	BLM	0.977819	A	G	-0.165404
1153	0.636404	0.0352716	2.25632	2.47514	11	BLMH	0.218042	A	G	0.229237
1154	-0.722656	0.0119956	-2.73955	3.13649	11	BLNK	0.116173	X	G	-0.026881
1155	0.0297548	0.930796	0.0892907	0.0893039	11	BLOC1S2	0.97551	B	G	0.210162
1156	0.150391	0.658941	0.454623	0.456365	11	BLOC1S3	0.866674	X	G	-0.0392926
1157	-0.116018	0.734085	-0.349628	0.35042	11	BLOC1S4	0.902919	B	G	0.110467
1158	-0.0985707	0.773089	-0.296675	0.297159	11	BLOC1S5	0.919322	B	G	-0.00617638
1159	-0.102255	0.76481	-0.307841	0.308382	11	BLOC1S6	0.915603	B	G	0.11899
1160	-0.093537	0.784435	-0.281434	0.281847	11	BLVRA	0.923337	X	G	-0.202008
1161	0.148544	0.662916	0.448953	0.450631	11	BLZF1	0.86841	B	G	0.446378
1162	0.932606	2.84292e-05	5.0341	7.75242	11	BMERB1	0.00334417	A	G	0.183055
1163	-0.373864	0.257361	-1.17872	1.20929	11	BMF	0.608312	X	G	0.0518598
1164	-0.231757	0.492897	-0.708137	0.714731	11	BMI1	0.771406	A	G	-0.100925
1165	-0.211009	0.533407	-0.642682	0.647609	11	BMP1	0.800125	X	G	-0.163818
1166	0.0617947	0.856768	0.185621	0.185739	11	BMP10	0.951082	X	G	0.253762
1167	-0.487023	0.128681	-1.59645	1.67287	11	BMP15	0.439637	B	G	0.251569
1168	0.893241	0.000212564	4.31321	5.96053	11	BMP2	0.0113716	G	G	0.886469
1169	-0.342158	0.30303	-1.06961	1.09241	11	BMP2K	0.640481	X	G	-0.24182
1170	-0.337298	0.310397	-1.05312	1.07488	11	BMP3	0.646926	X	G	0.0691518
1171	-0.685125	0.0199924	-2.51613	2.82167	11	BMP4	0.158077	X	G	-0.201057
1172	-0.247075	0.463892	-0.756885	0.76494	11	BMP5	0.751909	X	G	0.0787956
1173	-0.213114	0.529235	-0.649294	0.654375	11	BMP6	0.7982	X	G	-0.0635424
1174	-0.699692	0.0165389	-2.60009	2.93806	11	BMP7	0.141566	X	G	-0.0788339
1175	0.291216	0.384933	0.899683	0.91323	11	BMPER	0.695297	I	G	-0.188656
1176	0.465991	0.148563	1.51481	1.58	11	BMPR1A	0.47189	B	G	0.504309
1177	0.232342	0.491775	0.70999	0.716637	11	BMPR1B	0.77101	X	G	-0.0317713
1178	-0.872646	0.00045587	-4.0322	5.36074	11	BMPR2	0.0172042	C	G	-0.160394
1179	0.0263873	0.938615	0.0791802	0.0791894	11	BMS1	0.978504	X	G	-0.0429661
1180	0.461296	0.153248	1.49687	1.55976	11	BMT2	0.479855	A	G	0.283544
1181	-0.328097	0.324605	-1.02208	1.04197	11	BNC1	0.659294	X	G	-0.00202956
1182	-0.293075	0.381765	-0.905781	0.919606	11	BNC2	0.695297	X	G	0.0352394
1183	0.496279	0.1205	1.63307	1.71493	11	BNIP1	0.42576	A	G	-0.0615559
1184	-0.277748	0.40827	-0.855719	0.867371	11	BNIP2	0.710042	X	G	-0.137534
1185	-0.695117	0.0175734	-2.57337	2.90077	11	BNIP3	0.146191	X	G	-0.44591
1186	-0.225695	0.504591	-0.688945	0.695017	11	BNIP3L	0.779801	B	G	0.321676
1187	0.594652	0.0536607	2.0545	2.2189	11	BOC	0.278784	A	G	0.273517
1188	0.122873	0.718909	0.37049	0.371433	11	BOD1	0.896074	A	G	-0.0683018
1189	0.285326	0.395054	0.880413	0.893105	11	BOD1L1	0.699721	A	G	-0.0985422
1190	-0.704175	0.0155684	-2.6266	2.97528	11	BOK	0.135859	B	G	0.12462
1191	0.0475305	0.88963	0.142699	0.142753	11	BOLA1	0.960998	E	G	-0.130235
1192	-0.140437	0.680446	-0.424114	0.425528	11	BOLA3	0.877158	X	G	-0.176253
1193	-0.279838	0.404604	-0.862518	0.874449	11	BOLL	0.707585	X	G	-0.133818
1194	0.0671842	0.844402	0.201857	0.202009	11	BOP1	0.947683	D	G	0.0538223
1195	0.266707	0.427903	0.819945	0.830191	11	BORA	0.724384	A	G	-0.0900715
1196	0.128191	0.707196	0.386701	0.387773	11	BORCS5	0.8903	B	G	0.428842
1197	-0.671244	0.0237349	-2.43901	2.71672	11	BORCS6	0.17465	B	G	0.0182907
1198	-0.19401	0.567587	-0.589503	0.593304	11	BORCS7	0.818629	X	G	0.176635
1199	-0.00769456	0.982087	-0.0230841	0.0230844	11	BORCS8	0.995224	B	G	-0.186544
1200	-0.703101	0.0157971	-2.62022	2.9663	11	BPGM	0.13706	B	G	-0.100438
1201	0.498829	0.118305	1.64324	1.72665	11	BPHL	0.421337	X	G	-0.0228571
1202	-0.0989347	0.77227	-0.297778	0.298267	11	BPIFB2	0.91885	X	G	0.0158249
1203	0.406426	0.214828	1.29397	1.33446	11	BPIFC	0.559695	X	G	0.196735
1204	0.0587267	0.863821	0.176383	0.176485	11	BPNT1	0.953769	A	G	-0.0606373
1205	0.130747	0.701587	0.3945	0.395638	11	BPNT2	0.8881	A	G	-0.233656
1206	-0.151446	0.656676	-0.457861	0.45964	11	BPTF	0.86607	A	G	-0.0992578
1207	-0.765982	0.00598147	-3.0316	3.57455	11	BRAF	0.0760432	A	G	-0.226374
1208	-0.289172	0.38843	-0.892987	0.906233	11	BRAP	0.695297	D	G	0.163157
1209	-0.266253	0.428719	-0.818479	0.828671	11	BRAT1	0.725131	A	G	-0.182105
1210	0.110123	0.747205	0.331714	0.33239	11	BRCA1	0.907973	G	G	0.447336
1211	0.404437	0.217298	1.28683	1.32665	11	BRCA2	0.56222	A	G	-0.0434666
1212	0.218932	0.517776	0.667603	0.673127	11	BRCC3	0.789619	X	G	0.268492
1213	-0.343161	0.301522	-1.07301	1.09604	11	BRD1	0.638732	A	G	0.115047
1214	0.0696163	0.838832	0.209187	0.209357	11	BRD3	0.945378	A	G	0.0833
1215	-0.712394	0.0138966	-2.67608	3.04537	11	BRD3OS	0.126771	B	G	0.12231
1216	0.397195	0.226433	1.26094	1.2984	11	BRD7	0.571337	A	G	-0.102431
1217	-0.411386	0.208742	-1.31184	1.35404	11	BRD8	0.551429	D	G	-0.11094
1218	0.0927711	0.786164	0.279116	0.279519	11	BRD9	0.924306	A	G	-0.0968793
1219	-0.637132	0.0349972	-2.25999	2.4799	11	BRDT	0.217424	F	G	-0.0375599
1220	0.673758	0.023023	2.45278	2.73533	11	BRF1	0.171394	X	G	0.172246
1221	-0.0479977	0.888551	-0.144104	0.144159	11	BRF2	0.960512	X	G	-0.0911563
1222	0.0744388	0.827807	0.22373	0.223938	11	BRI3	0.940966	D	G	0.309853
1223	0.193144	0.56935	0.586804	0.590553	11	BRI3BP	0.819791	X	G	0.332871
1224	0.056545	0.868841	0.169816	0.169907	11	BRICD5	0.95504	X	G	-0.0884987
1225	0.954242	5.13821e-06	5.63159	9.57321	11	BRINP1	0.00143014	C	G	-0.0757859
1226	-0.73576	0.00985101	-2.82352	3.25922	11	BRINP2	0.102511	A	G	-0.209208
1227	-0.0405371	0.905802	-0.121678	0.121711	11	BRIP1	0.966281	A	G	0.0671658
1228	-0.328646	0.323747	-1.02393	1.04393	11	BRIX1	0.658732	E	G	0.144663
1229	-0.341362	0.30423	-1.0669	1.08953	11	BRK1	0.642144	X	G	-0.0560613
1230	-0.628873	0.0382017	-2.21865	2.42649	11	BRMS1L	0.228749	B	G	0.0332427
1231	0.448361	0.16663	1.44794	1.50481	11	BROX	0.49922	B	G	0.602752
1232	-0.132067	0.698697	-0.398528	0.399701	11	BRPF1	0.886258	D	G	-0.0466624
1233	-0.528787	0.0944421	-1.76538	1.86905	11	BRPF3	0.378201	B	G	0.0794398
1234	0.699097	0.0166711	2.59659	2.93316	11	BRS3	0.142394	B	G	0.564749
1235	-0.2944	0.379516	-0.910131	0.924156	11	BRSK2	0.695297	D	G	-0.242323
1236	0.0490577	0.886103	0.147291	0.147351	11	BRWD1	0.959811	C	G	-0.110961
1237	0.282028	0.400779	0.869652	0.881883	11	BRWD3	0.70463	X	G	-0.0263706
1238	0.595957	0.0530037	2.06056	2.22644	11	BSCL2	0.277028	B	G	0.088029
1239	0.134234	0.693958	0.405146	0.406379	11	BSDC1	0.883646	B	G	0.0223016
1240	0.325514	0.328656	1.01341	1.03279	11	BSG	0.662856	D	G	-0.145789
1241	0.383778	0.243939	1.21345	1.24681	11	BSN	0.593113	D	G	0.258827
1242	-0.361277	0.274993	-1.13506	1.16234	11	BSND	0.625662	X	G	-0.0892705
1243	0.665786	0.0253339	2.40941	2.67691	11	BSPRY	0.180514	X	G	0.527217
1244	-0.364483	0.270439	-1.14614	1.17422	11	BST1	0.621943	A	G	-0.118359
1245	0.0877318	0.797566	0.263874	0.264214	11	BSX	0.92844	X	G	0.0110774
1246	0.210376	0.534664	0.640696	0.645577	11	BTAF1	0.800861	A	G	-0.160684
1247	-0.864067	0.000603431	-3.92754	5.14964	11	BTBD1	0.020081	B	G	0.00967413
1248	-0.680238	0.0212582	-2.48867	2.78409	11	BTBD10	0.164149	A	G	-0.15278
1249	0.364493	0.270426	1.14617	1.17426	11	BTBD11	0.621943	F	G	-0.10237
1250	0.474419	0.14038	1.54727	1.61679	11	BTBD17	0.459144	A	G	-0.238618
1251	0.30977	0.353916	0.960874	0.977388	11	BTBD18	0.683734	F	G	0.145037
1252	0.356412	0.281984	1.11831	1.14439	11	BTBD19	0.63295	C	G	0.236301
1253	-0.461532	0.153011	-1.49777	1.56077	11	BTBD2	0.47941	D	G	-0.0135561
1254	0.0569175	0.867984	0.170937	0.17103	11	BTBD3	0.954704	B	G	0.418509
1255	0.831432	0.00151233	3.57827	4.48917	11	BTBD6	0.0344447	A	G	-0.0144406
1256	-0.392277	0.232761	-1.24347	1.27938	11	BTBD7	0.578952	A	G	-0.0535919
1257	0.148705	0.662569	0.449447	0.45113	11	BTBD8	0.868276	F	G	0.103658
1258	0.0641086	0.851455	0.19259	0.192722	11	BTBD9	0.949969	A	G	-0.208648
1259	-0.54649	0.0819525	-1.84009	1.95766	11	BTC	0.350889	F	G	-0.0240324
1260	-0.048981	0.886281	-0.147061	0.147119	11	BTD	0.959811	C	G	-0.11115
1261	-0.275985	0.411375	-0.849991	0.861409	11	BTF3	0.71175	E	G	0.190368
1262	-0.455342	0.159322	-1.47426	1.53432	11	BTF3L4	0.488828	B	G	0.0222805
1263	-0.906097	0.000121626	-4.51583	6.42517	11	BTG1	0.00802959	A	G	-0.211815
1264	0.461021	0.153526	1.49582	1.55857	11	BTG4	0.480202	C	G	-0.112758
1265	0.221914	0.511944	0.677005	0.682766	11	BTK	0.784457	E	G	0.217576
1266	-0.292926	0.382019	-0.905291	0.919094	11	BTRC	0.695297	A	G	-0.129097
1267	0.439341	0.176374	1.41424	1.46721	11	BUB1	0.514377	X	G	0.128367
1268	-0.234635	0.487388	-0.717265	0.724118	11	BUB1B	0.768346	A	G	-0.172557
1269	-0.252447	0.453908	-0.774075	0.782693	11	BUB3	0.743747	B	G	0.193637
1270	-0.300192	0.369762	-0.929192	0.94412	11	BUD13	0.695297	A	G	-0.188846
1271	-0.194	0.567607	-0.589471	0.593271	11	BUD23	0.818629	D	G	-0.0316852
1272	-0.227563	0.500974	-0.694855	0.701084	11	BUD31	0.777193	H	G	-0.127891
1273	0.392532	0.232431	1.24437	1.28036	11	BVES	0.578622	A	G	-0.14327
1274	-0.121634	0.721646	-0.366716	0.36763	11	BYSL	0.897181	D	G	0.159644
1275	-0.4443	0.170974	-1.43273	1.48782	11	BZW1	0.50634	B	G	0.0334464
1276	-0.843181	0.00111232	-3.69624	4.70499	11	BZW2	0.0285023	A	G	-0.171175
1277	-0.272277	0.417942	-0.837963	0.848902	11	C10H15orf40	0.716681	A	G	0.0366831
1278	0.191324	0.573066	0.581132	0.584774	11	C10H15orf48	0.821261	A	G	0.0585811
1279	-0.423769	0.193998	-1.35683	1.40356	11	C10H15orf61	0.53459	A	G	-0.313439
1280	-0.493643	0.122794	-1.6226	1.70288	11	C11H16orf70	0.429927	B	G	0.0187639
1281	-0.68919	0.0189813	-2.53924	2.85347	11	C11H16orf87	0.15303	B	G	0.1426
1282	-0.477107	0.13783	-1.5577	1.62864	11	C12H3orf14	0.454837	B	G	0.123719
1283	0.0199815	0.953501	0.0599524	0.0599564	11	C12H3orf18	0.984056	A	G	-0.184768
1284	-0.405283	0.216246	-1.28986	1.32997	11	C13H5orf15	0.56093	B	G	0.023118
1285	0.873028	0.000450012	4.03701	5.37059	11	C13H5orf24	0.0171115	B	G	0.311018
1286	0.0477636	0.889092	0.1434	0.143455	11	C13H5orf47	0.960735	C	G	-0.0217539
1287	-0.123223	0.718135	-0.371558	0.372508	11	C14H16orf71	0.89561	X	G	0.0926468
1288	-0.152653	0.654087	-0.461566	0.463389	11	C14H16orf72	0.865195	X	G	-0.166457
1289	-0.0639877	0.851733	-0.192226	0.192357	11	C14H16orf91	0.949969	X	G	-0.0790291
1290	-0.44813	0.166875	-1.44707	1.50384	11	C14H7orf26	0.499613	D	G	0.0898423
1291	-0.0645321	0.850484	-0.193866	0.194001	11	C14H7orf50	0.949802	X	G	0.29978
1292	-0.0664289	0.846133	-0.19958	0.199728	11	C15H12orf43	0.948452	A	G	-0.0486167
1293	0.212967	0.529527	0.648832	0.653902	11	C15H12orf49	0.798204	X	G	-0.0232095
1294	0.332164	0.318283	1.03578	1.05648	11	C15H12orf65	0.654259	X	G	-0.00167093
1295	0.0769493	0.822078	0.231305	0.231535	11	C15H22orf15	0.938591	C	G	0.149048
1296	0.139244	0.683038	0.420463	0.421841	11	C15H22orf39	0.878222	X	G	0.057448
1297	0.500658	0.116748	1.65055	1.73509	11	C17H9orf116	0.418197	X	G	0.142815
1298	-0.406398	0.214863	-1.29387	1.33435	11	C17H9orf16	0.559695	X	G	-0.00236137
1299	-0.610936	0.0458532	-2.13124	2.31509	11	C17H9orf78	0.254508	B	G	0.00861979
1300	0.447755	0.167274	1.44567	1.50227	11	C18H17orf58	0.500032	B	G	0.541669
1301	-0.818758	0.00205542	-3.45911	4.27819	11	C18H17orf67	0.0409355	B	G	0.0154008
1302	-0.405641	0.215801	-1.29115	1.33138	11	C18H17orf75	0.560693	A	G	-0.32922
1303	-0.315976	0.343842	-0.981512	0.999116	11	C18H17orf80	0.675889	B	G	-0.0551597
1304	0.180793	0.594738	0.548409	0.551468	11	C1AH12orf29	0.832335	A	G	0.284324
1305	-0.0495848	0.884887	-0.148877	0.148938	11	C1AH12orf4	0.959365	A	G	0.125845
1306	0.203465	0.54847	0.619034	0.623436	11	C1AH12orf40	0.807412	X	G	0.123235
1307	0.630851	0.0374163	2.22848	2.43916	11	C1AH12orf45	0.22596	C	G	0.199666
1308	0.362197	0.273682	1.13824	1.16574	11	C1AH12orf50	0.624161	X	G	0.135519
1309	-0.454578	0.160112	-1.47137	1.53107	11	C1AH12orf66	0.49043	B	G	0.0225362
1310	-0.14798	0.664131	-0.447222	0.448881	11	C1AH12orf73	0.869104	B	G	0.0164478
1311	0.509288	0.109577	1.6853	1.77536	11	C1AH12orf75	0.40641	C	G	0.382155
1312	-0.397761	0.225711	-1.26296	1.30059	11	C1AH22orf23	0.57077	A	G	-0.0878915
1313	0.24681	0.464387	0.756038	0.764066	11	C1D	0.752206	X	G	0.070038
1314	-0.286859	0.392408	-0.88542	0.898331	11	C1GALT1	0.697718	A	G	-0.0949374
1315	-0.152828	0.653711	-0.462105	0.463935	11	C1GALT1C1	0.865111	X	G	0.0484153
1316	0.049734	0.884542	0.149325	0.149387	11	C1H11orf54	0.959195	X	G	0.301686
1317	-0.841128	0.00117569	-3.67505	4.66571	11	C1H11orf87	0.0295583	X	G	-0.365243
1318	-0.140571	0.680154	-0.424525	0.425943	11	C1H11orf97	0.877056	X	G	0.0212391
1319	0.422506	0.195472	1.35222	1.39847	11	C1H12orf57	0.536268	X	G	-0.0779579
1320	0.689544	0.0188951	2.54126	2.85627	11	C1H13orf42	0.152763	X	G	0.178134
1321	0.222118	0.511546	0.67765	0.683427	11	C1H21orf91	0.784132	C	G	0.229628
1322	-0.396972	0.226717	-1.26015	1.29754	11	C1H2orf49	0.571721	A	G	-0.261505
1323	-0.361789	0.274262	-1.13683	1.16423	11	C1H3orf38	0.624901	B	G	0.0436301
1324	0.00756272	0.982394	0.0226886	0.0226888	11	C1H3orf52	0.995224	C	G	0.314944
1325	-0.358738	0.27863	-1.12631	1.15296	11	C1H3orf85	0.629269	F	G	-0.0346749
1326	0.0705235	0.836756	0.211922	0.212099	11	C1HXorf21	0.944732	A	G	0.0803821
1327	-0.223482	0.508889	-0.681954	0.687843	11	C1QB	0.782294	C	G	0.105881
1328	-0.331099	0.319933	-1.03219	1.05267	11	C1QC	0.655942	C	G	0.131182
1329	0.0680609	0.842393	0.204499	0.204657	11	C1QL1	0.94711	B	G	-0.0614182
1330	-0.849703	0.00092792	-3.76525	4.83463	11	C1QL2	0.025745	C	G	-0.23337
1331	-0.69069	0.0186178	-2.54782	2.86533	11	C1QL3	0.151184	C	G	-0.087337
1332	-0.144967	0.670633	-0.437985	0.439543	11	C1QTNF1	0.872278	X	G	-0.0143502
1333	-0.0393357	0.908583	-0.118068	0.118099	11	C1QTNF12	0.967467	B	G	0.0041081
1334	0.136633	0.688721	0.41248	0.413781	11	C1QTNF2	0.881125	F	G	-0.0394675
1335	-0.337036	0.310797	-1.05224	1.07394	11	C1QTNF3	0.647199	A	G	-0.192626
1336	-0.334223	0.315108	-1.04272	1.06385	11	C1QTNF4	0.651345	C	G	-0.270993
1337	-0.28003	0.404267	-0.863145	0.875103	11	C1QTNF5	0.707423	X	G	-0.0616135
1338	0.0418139	0.902847	0.125515	0.125551	11	C1QTNF6	0.965279	X	G	-0.175001
1339	-0.686562	0.0196309	-2.52427	2.83285	11	C1QTNF7	0.156266	B	G	0.018763
1340	-0.608277	0.0470706	-2.11855	2.29907	11	C1QTNF8	0.25868	X	G	-0.0817676
1341	-0.198899	0.55767	-0.604757	0.608861	11	C1R	0.812688	C	G	0.148418
1342	0.182904	0.59037	0.554955	0.558126	11	C1S	0.829976	C	G	0.264618
1343	-0.0158877	0.963021	-0.047667	0.047669	11	C20H20orf204	0.987827	X	G	0.0259608
1344	-0.591748	0.0551426	-2.04105	2.2022	11	C20H20orf85	0.28246	X	G	-0.0969775
1345	0.499841	0.117442	1.64728	1.73132	11	C21H1orf159	0.4196	X	G	0.331036
1346	-0.418688	0.19997	-1.3383	1.38313	11	C21H1orf167	0.541186	X	G	0.0851373
1347	-0.362077	0.273852	-1.13782	1.1653	11	C21H1orf174	0.624338	B	G	-0.0858064
1348	-0.113232	0.740277	-0.34116	0.341896	11	C21H1orf50	0.905804	X	G	0.0774716
1349	-0.0278747	0.935161	-0.0836459	0.0836567	11	C22H2orf42	0.977692	D	G	-0.133911
1350	0.079392	0.816512	0.238678	0.23893	11	C22H2orf68	0.935955	B	G	-0.116824
1351	0.20037	0.554699	0.609354	0.613552	11	C22H8orf58	0.810413	X	G	-0.0885422
1352	0.0895152	0.793526	0.269266	0.269628	11	C23H1orf109	0.927094	X	G	0.0153037
1353	0.186822	0.582293	0.567126	0.57051	11	C23H1orf216	0.824973	D	G	0.0668114
1354	0.516833	0.103546	1.71603	1.81115	11	C23H1orf232	0.395901	X	G	0.184118
1355	0.24045	0.47634	0.735754	0.743152	11	C24H11orf52	0.760745	C	G	0.0746929
1356	NA	NA	NA	NA	11	C24H11orf53	NA	X	G	-0.035565
1357	-0.0493923	0.885331	-0.148298	0.148358	11	C25H1orf189	0.959365	X	G	-0.0977673
1358	-0.796975	0.00331226	-3.2708	3.95841	11	C25H1orf43	0.0543468	D	G	-0.303207
1359	0.473848	0.140924	1.54506	1.61428	11	C26H1orf116	0.45951	X	G	0.241152
1360	-0.112036	0.742941	-0.337525	0.338237	11	C26H1orf162	0.906507	A	G	-0.243714
1361	-0.272397	0.417729	-0.838353	0.849307	11	C26H1orf74	0.71662	B	G	0.165786
1362	-0.490393	0.125663	-1.60973	1.6881	11	C26H6orf132	0.434612	X	G	-0.0518374
1363	-0.536215	0.0890591	-1.79648	1.90579	11	C26H6orf89	0.367156	C	G	-0.139295
1364	0.272999	0.416659	0.840305	0.851336	11	C27H17orf113	0.715712	A	G	0.161431
1365	-0.187108	0.581704	-0.568017	0.571417	11	C28H19orf25	0.824903	D	G	-0.0593222
1366	0.475224	0.139612	1.55039	1.62033	11	C28H19orf44	0.457527	X	G	0.0341625
1367	0.184924	0.5862	0.561229	0.564508	11	C2CD2	0.827468	X	G	-0.110123
1368	-0.612007	0.0453689	-2.13637	2.32157	11	C2CD2L	0.252867	B	G	0.0518626
1369	-0.0110381	0.974305	-0.0331155	0.0331162	11	C2CD3	0.991959	A	G	-0.133009
1370	-0.757865	0.00688508	-2.97354	3.48491	11	C2CD4C	0.0820773	B	G	0.115959
1371	-0.388779	0.237325	-1.23108	1.26593	11	C2CD5	0.584809	X	G	0.0208835
1372	0.238188	0.480623	0.728558	0.73574	11	C2H18orf21	0.764429	X	G	0.118766
1373	0.034634	0.919478	0.103943	0.103964	11	C2H18orf63	0.971596	X	G	0.0340131
1374	-0.0578922	0.865741	-0.173871	0.173968	11	C2H1orf35	0.954029	D	G	0.0803362
1375	0.0920121	0.787879	0.276819	0.277212	11	C2H5orf22	0.924794	A	G	0.23905
1376	-0.193267	0.569101	-0.587185	0.590942	11	C2H5orf49	0.819624	A	G	0.277177
1377	0.342439	0.302608	1.07056	1.09343	11	C2H6orf62	0.64021	X	G	0.099704
1378	0.0599069	0.861107	0.179936	0.180044	11	C2H7orf25	0.952707	X	G	0.317365
1379	0.663234	0.026107	2.3957	2.65857	11	C2H7orf31	0.183745	X	G	0.305154
1380	0.87688	0.000394018	4.08632	5.47242	11	C2H8orf34	0.0157632	F	G	0.467918
1381	-0.338321	0.308838	-1.05659	1.07857	11	C2H8orf37	0.646103	A	G	-0.124975
1382	0.764244	0.00616717	3.01902	3.55502	11	C2H8orf76	0.0774811	A	G	-0.106843
1383	0.136126	0.689827	0.41093	0.412216	11	C2H8orf88	0.881511	X	G	0.0655698
1384	0.100596	0.768537	0.302811	0.303325	11	C2H9orf152	0.916994	X	G	0.0812555
1385	0.24971	0.458982	0.765311	0.773639	11	C3	0.747585	X	G	0.111876
1386	0.099033	0.772049	0.298076	0.298567	11	C3AR1	0.918771	X	G	-0.0211974
1387	-0.666048	0.0252555	-2.41082	2.6788	11	C3H1orf115	0.180266	C	G	-0.245004
1388	0.250027	0.458393	0.766326	0.774688	11	C3H1orf131	0.74709	X	G	0.196441
1389	0.00303417	0.992936	0.00910255	0.00910256	11	C3H1orf198	0.998346	B	G	0.17443
1390	-0.28738	0.39151	-0.887124	0.90011	11	C3H2orf50	0.697026	X	G	-0.102711
1391	0.0543646	0.873863	0.163255	0.163335	11	C3H6orf120	0.956442	A	G	-0.078415
1392	0.104704	0.759319	0.315268	0.315848	11	C3H6orf58	0.91339	X	G	0.135158
1393	-0.0814658	0.811792	-0.24494	0.245212	11	C4AH8orf48	0.934271	A	G	-0.281155
1394	-0.0788606	0.817722	-0.237074	0.237321	11	C4AHXorf56	0.936475	X	G	0.0884966
1395	-0.608203	0.0471052	-2.11819	2.29863	11	C4H20orf194	0.25868	A	G	-0.167904
1396	-0.755659	0.00714709	-2.95805	3.46122	11	C4H20orf27	0.0840723	D	G	-0.051974
1397	-0.267292	0.42685	-0.821836	0.832154	11	C4H4orf19	0.723954	B	G	0.400938
1398	0.0942956	0.782722	0.28373	0.284153	11	C4H4orf46	0.922867	X	G	0.0478536
1399	0.0943302	0.782644	0.283834	0.284258	11	C4H4orf50	0.922867	K	G	-0.07345
1400	0.329342	0.322663	1.02627	1.0464	11	C4H4orf54	0.657611	X	G	-0.00849386
1401	-0.185592	0.584823	-0.563305	0.566621	11	C5	0.82651	X	G	0.122927
1402	-0.663944	0.0258904	-2.3995	2.66365	11	C5H11orf16	0.182898	C	G	0.069171
1403	0.298225	0.37306	0.92271	0.937327	11	C5H11orf24	0.695297	X	G	-0.120151
1404	-0.435606	0.180508	-1.40039	1.4518	11	C5H11orf49	0.519066	X	G	-0.397588
1405	-0.459403	0.155164	-1.48966	1.55164	11	C5H11orf58	0.482547	A	G	0.0412416
1406	0.0256317	0.94037	0.076912	0.0769205	11	C5H11orf91	0.979387	X	G	0.196254
1407	-0.360922	0.275499	-1.13384	1.16102	11	C5H11orf94	0.626243	X	G	-0.0472936
1408	-0.643307	0.0327274	-2.29139	2.52077	11	C5H11orf96	0.208778	F	G	-0.204744
1409	-0.927829	3.84195e-05	-4.92767	7.46232	11	C5H14orf132	0.0041203	A	G	-0.300816
1410	-0.111577	0.743964	-0.33613	0.336834	11	C5H14orf180	0.906507	X	G	-0.00806381
1411	0.666805	0.0250298	2.4149	2.68428	11	C5H14orf39	0.17987	C	G	0.255493
1412	0.500201	0.117136	1.64872	1.73298	11	C5H15orf41	0.419026	D	G	0.270198
1413	-0.512975	0.106602	-1.70028	1.79277	11	C5H15orf62	0.400821	B	G	0.369466
1414	-0.380606	0.248188	-1.20231	1.23475	11	C6	0.597666	A	G	-0.0251381
1415	0.34641	0.296665	1.08408	1.10782	11	C6H10orf105	0.63409	X	G	-0.04046
1416	0.0664953	0.845981	0.199781	0.199928	11	C6H10orf143	0.948334	X	G	-0.121341
1417	0.70437	0.0155273	2.62776	2.97691	11	C6H10orf71	0.135723	F	G	0.280154
1418	-0.180512	0.595322	-0.547535	0.55058	11	C6H10orf88	0.832515	B	G	0.0369722
1419	0.550055	0.0795776	1.85538	1.97594	11	C6H10orf90	0.345202	I	G	-0.325716
1420	-0.954751	4.88984e-06	-5.64874	9.63073	11	C6H10orf95	0.00143014	A	G	-0.187482
1421	-0.275878	0.411563	-0.849644	0.861048	11	C7	0.711831	X	G	0.0677119
1422	0.138129	0.685464	0.417052	0.418397	11	C7H21orf58	0.879231	A	G	0.0764656
1423	0.258397	0.44297	0.79317	0.802443	11	C7H2orf66	0.735844	X	G	-0.010475
1424	0.0591086	0.862942	0.177533	0.177636	11	C7H2orf69	0.953429	F	G	0.0973029
1425	-0.248719	0.460826	-0.76214	0.770365	11	C7H2orf76	0.749047	X	G	0.034402
1426	-0.0875695	0.797933	-0.263383	0.263722	11	C7H2orf88	0.92844	C	G	-0.167496
1427	-0.390791	0.234694	-1.2382	1.27365	11	C8A	0.581747	X	G	-0.0871486
1428	-0.176292	0.604094	-0.53446	0.537291	11	C8B	0.837428	A	G	0.0850334
1429	0.641567	0.0333561	2.2825	2.50917	11	C8G	0.210997	A	G	0.180504
1430	-0.290952	0.385383	-0.898819	0.912326	11	C8H1orf112	0.695297	A	G	0.272211
1431	0.276823	0.409896	0.852715	0.864243	11	C8H1orf146	0.711428	E	G	-0.0242366
1432	-0.326173	0.32762	-1.01562	1.03513	11	C8H1orf21	0.661789	A	G	-0.0073069
1433	-0.261564	0.437198	-0.803359	0.812995	11	C8H1orf210	0.731486	X	G	-0.0989979
1434	-0.743965	0.00865919	-2.87791	3.34007	11	C8H1orf52	0.0946628	A	G	-0.104082
1435	0.286489	0.393045	0.884212	0.89707	11	C9	0.697926	X	G	0.0546166
1436	-0.288675	0.389283	-0.891361	0.904534	11	C9H17orf50	0.695297	X	G	0.0203806
1437	0.767103	0.00586386	3.03975	3.58726	11	C9H2orf72	0.0749851	X	G	0.196153
1438	-0.698302	0.0168485	-2.59194	2.92665	11	C9H3orf33	0.143038	B	G	0.0121323
1439	-0.732171	0.0104081	-2.80018	3.22485	11	C9H3orf70	0.106454	B	G	0.23936
1440	0.0502976	0.883242	0.15102	0.151084	11	C9orf72	0.958791	E	G	0.175783
1441	-0.966205	1.33697e-06	-6.09531	11.2447	11	CA10	0.000840413	B	G	0.0940318
1442	-0.20596	0.543469	-0.626846	0.631418	11	CA12	0.804405	E	G	0.10384
1443	0.0248855	0.942103	0.0746718	0.0746795	11	CA14	0.98021	C	G	-0.106164
1444	0.648457	0.0309149	2.3179	2.55549	11	CA4	0.202229	X	G	-0.0388852
1445	0.121324	0.72233	0.365773	0.36668	11	CA5A	0.897503	C	G	-0.10288
1446	0.459007	0.155566	1.48816	1.54994	11	CA6	0.482755	B	G	-0.0662203
1447	0.411084	0.209109	1.31075	1.35285	11	CA7	0.551635	C	G	0.269098
1448	-0.844839	0.00106304	-3.71353	4.73724	11	CA8	0.0275111	B	G	-0.0500417
1449	0.0583037	0.864794	0.17511	0.175209	11	CAAP1	0.953992	E	G	0.280781
1450	-0.341777	0.303604	-1.06831	1.09103	11	CAB39	0.641155	A	G	-0.0913864
1451	0.792236	0.00364776	3.23223	3.89488	11	CAB39L	0.057324	B	G	0.455053
1452	-0.779354	0.00468702	-3.13117	3.73144	11	CABCOCO1	0.0661592	A	G	-0.284569
1453	-0.340879	0.304961	-1.06526	1.08779	11	CABIN1	0.642726	B	G	0.23844
1454	-0.889853	0.000243415	-4.26366	5.85113	11	CABLES1	0.0123287	B	G	-0.28544
1455	0.887169	0.000270182	4.22542	5.76778	11	CABLES2	0.0127875	F	G	0.310301
1456	0.870412	0.000491327	4.00433	5.30389	11	CABP1	0.017866	G	G	0.798413
1457	-0.155848	0.647249	-0.471386	0.473328	11	CABP2	0.860542	A	G	0.110733
1458	-0.644299	0.0323726	-2.29647	2.52741	11	CABP7	0.207742	X	G	-0.123959
1459	-0.584326	0.0590561	-2.00702	2.16012	11	CACFD1	0.293095	A	G	-0.0320547
1460	-0.682742	0.0206028	-2.5027	2.80325	11	CACHD1	0.160817	A	G	-0.370165
1461	0.493189	0.123192	1.6208	1.70081	11	CACNA1B	0.430211	X	G	0.305796
1462	0.56497	0.0701404	1.92031	2.05416	11	CACNA1C	0.322486	A	G	-0.140429
1463	0.0621104	0.856043	0.186571	0.186692	11	CACNA1D	0.951082	B	G	0.0948878
1464	-0.350096	0.291207	-1.09666	1.12125	11	CACNA1E	0.63409	B	G	0.0352821
1465	-0.938336	1.92205e-05	-5.17183	8.14234	11	CACNA1G	0.00286385	A	G	-0.247183
1466	-0.595822	0.0530714	-2.05993	2.22566	11	CACNA1H	0.277077	C	G	-0.205943
1467	0.148503	0.663004	0.448827	0.450504	11	CACNA1I	0.86842	C	G	0.0229337
1468	0.481332	0.133883	1.57415	1.64739	11	CACNA1S	0.44896	X	G	-0.204095
1469	-0.87103	0.000481314	-4.01199	5.31948	11	CACNA2D1	0.0176017	B	G	-0.024671
1470	0.85944	0.000696644	3.8736	5.04331	11	CACNA2D2	0.0215797	C	G	0.121258
1471	0.116925	0.732071	0.352388	0.353199	11	CACNA2D3	0.902392	A	G	-0.219988
1472	-0.0270169	0.937153	-0.0810704	0.0810802	11	CACNA2D4	0.977955	X	G	-0.118127
1473	-0.36539	0.269158	-1.14928	1.1776	11	CACNB1	0.621032	A	G	-0.277886
1474	-0.940724	1.61475e-05	-5.23291	8.32072	11	CACNB2	0.00270672	B	G	0.0574222
1475	0.0816372	0.811402	0.245458	0.245732	11	CACNB3	0.934094	D	G	0.14921
1476	-0.686935	0.0195377	-2.52639	2.83577	11	CACNB4	0.155967	C	G	-0.241853
1477	-0.517705	0.102864	-1.7196	1.81532	11	CACNG1	0.394416	B	G	0.0400849
1478	0.252262	0.45425	0.773483	0.782081	11	CACNG2	0.744028	F	G	-0.0954345
1479	-0.758795	0.00677683	-2.9801	3.49498	11	CACNG3	0.0811978	B	G	-0.0242553
1480	-0.781949	0.004462	-3.1511	3.76334	11	CACNG4	0.0645398	B	G	0.240207
1481	-0.887253	0.00026932	-4.22659	5.77032	11	CACNG5	0.0127865	C	G	-0.270458
1482	0.312978	0.348691	0.971529	0.988599	11	CACTIN	0.680356	D	G	-0.0366138
1483	-0.375561	0.255035	-1.18464	1.21567	11	CACUL1	0.606099	C	G	-0.00814843
1484	0.0445581	0.896499	0.133763	0.133807	11	CACYBP	0.963809	A	G	-0.0794887
1485	-0.170836	0.615508	-0.517582	0.520154	11	CAD	0.843694	A	G	-0.00333627
1486	0.495619	0.121072	1.63044	1.7119	11	CADM1	0.426521	F	G	-0.0476416
1487	0.617989	0.042729	2.16523	2.35817	11	CADM2	0.244608	A	G	-0.208351
1488	-0.0596458	0.861707	-0.17915	0.179256	11	CADM3	0.952871	A	G	0.237014
1489	0.203938	0.54752	0.620515	0.624949	11	CADPS	0.807039	B	G	0.134195
1490	0.944976	1.16232e-05	5.34786	8.66581	11	CADPS2	0.00231485	B	G	0.485282
1491	-0.776311	0.00496134	-3.10806	3.69467	11	CALB1	0.0686528	X	G	0.0936899
1492	-0.935686	2.31371e-05	-5.10666	7.95575	11	CALB2	0.00304184	A	G	-0.447122
1493	0.807969	0.00262238	3.36346	4.11373	11	CALCB	0.0473937	F	G	0.00998074
1494	0.977602	2.1349e-07	6.721	13.935	11	CALCR	0.000347247	B	G	0.146349
1495	-0.196445	0.562638	-0.597097	0.601048	11	CALCRL	0.816497	X	G	-0.141344
1496	-0.150792	0.65808	-0.455852	0.457608	11	CALD1	0.866472	X	G	-0.167615
1497	0.103075	0.762971	0.310327	0.31088	11	CALHM1	0.914811	X	G	0.197868
1498	-0.534017	0.0906306	-1.78724	1.89485	11	CALHM2	0.369733	X	G	-0.0360673
1499	-0.32951	0.322401	-1.02684	1.047	11	CALHM3	0.657611	X	G	0.0186628
1500	-0.0487919	0.886717	-0.146492	0.14655	11	CALHM4	0.959871	X	G	-0.107008
1501	0.023164	0.946103	0.0695044	0.0695107	11	CALHM5	0.981492	A	G	-0.12572
1502	0.186283	0.583402	0.56545	0.568804	11	CALHM6	0.825546	X	G	0.473376
1503	-0.334581	0.314558	-1.04393	1.06513	11	CALM1	0.651227	F	G	-0.0823292
1504	-0.373174	0.258311	-1.17632	1.20669	11	CALM2	0.60895	B	G	-0.0705048
1505	0.391425	0.233868	1.24045	1.27609	11	CALML4	0.580486	X	G	0.0325482
1506	-0.410595	0.209705	-1.30898	1.35091	11	CALN1	0.552629	A	G	-0.420289
1507	0.108679	0.750428	0.32733	0.32798	11	CALR	0.909402	X	G	-0.0309036
1508	-0.11528	0.735724	-0.347385	0.348161	11	CALU	0.903625	D	G	0.114312
1509	0.535632	0.0894739	1.79403	1.90289	11	CAMK1	0.367717	A	G	0.490414
1510	0.587828	0.0571864	2.02302	2.17987	11	CAMK1D	0.287864	B	G	0.424663
1511	-0.760893	0.00653712	-2.99499	3.51788	11	CAMK1G	0.0798119	C	G	-0.134173
1512	-0.788032	0.00396592	-3.19866	3.8401	11	CAMK2A	0.0599808	B	G	-0.197978
1513	-0.232579	0.49132	-0.710743	0.71741	11	CAMK2B	0.770723	D	G	-0.122408
1514	-0.739276	0.00932656	-2.84665	3.29347	11	CAMK2D	0.0986379	B	G	0.358156
1515	-0.161565	0.635076	-0.488979	0.491147	11	CAMK2G	0.853225	X	G	-0.111479
1516	-0.969046	9.04175e-07	-6.22922	11.7756	11	CAMK2N1	0.000640775	B	G	0.0514086
1517	-0.625749	0.039465	-2.2032	2.40665	11	CAMK2N2	0.233345	A	G	0.0709329
1518	0.0567819	0.868296	0.170529	0.170621	11	CAMK4	0.95476	C	G	-0.0979742
1519	0.0940078	0.783372	0.282859	0.283278	11	CAMKK1	0.923166	B	G	0.14858
1520	-0.114966	0.736421	-0.346431	0.347202	11	CAMKK2	0.903954	A	G	-0.287732
1521	-0.0796363	0.815955	-0.239416	0.23967	11	CAMKMT	0.935922	H	G	0.105415
1522	-0.47627	0.138621	-1.55445	1.62494	11	CAMKV	0.456189	B	G	-0.418707
1523	-0.201835	0.551746	-0.613935	0.61823	11	CAMLG	0.80893	B	G	0.239371
1524	-0.255254	0.448733	-0.783074	0.791997	11	CAMP	0.740465	X	G	-0.026626
1525	-0.702265	0.0159767	-2.61527	2.95934	11	CAMSAP1	0.138106	A	G	-0.252509
1526	0.805925	0.00274172	3.34588	4.08396	11	CAMSAP2	0.0485045	X	G	0.268836
1527	0.956718	4.01472e-06	5.71694	9.86253	11	CAMTA1	0.00141088	F	G	0.202959
1528	0.618728	0.0424103	2.16882	2.36274	11	CAND1	0.24339	X	G	0.413487
1529	-0.379724	0.249378	-1.19921	1.2314	11	CANT1	0.59874	D	G	-0.00399464
1530	0.577337	0.0629099	1.97538	2.12125	11	CANX	0.303461	E	G	0.202692
1531	-0.864093	0.000602949	-3.92784	5.15023	11	CAP1	0.020081	D	G	-0.297988
1532	-0.855806	0.000777165	-3.83237	4.96315	11	CAP2	0.0231856	C	G	-0.371413
1533	-0.672362	0.0234166	-2.44512	2.72497	11	CAPN10	0.173362	B	G	-0.13739
1534	0.566612	0.0691494	1.92756	2.06295	11	CAPN11	0.320051	C	G	0.0278284
1535	0.224969	0.505998	0.686653	0.692664	11	CAPN14	0.780236	X	G	0.139011
1536	-0.607122	0.0476065	-2.11305	2.29215	11	CAPN15	0.26025	A	G	-0.182161
1537	0.594406	0.0537851	2.05335	2.21748	11	CAPN3	0.278784	X	G	0.303183
1538	-0.479412	0.135668	-1.56666	1.63885	11	CAPN5	0.45127	A	G	-0.122657
1539	-0.167929	0.62162	-0.508604	0.511044	11	CAPN6	0.846399	L	G	-0.0229895
1540	-0.534568	0.0902346	-1.78956	1.89759	11	CAPN7	0.368991	C	G	-0.135571
1541	-0.368869	0.264279	-1.16134	1.19056	11	CAPN8	0.615417	A	G	-0.205079
1542	0.464401	0.150139	1.50873	1.57313	11	CAPN9	0.474644	X	G	0.213913
1543	0.654372	0.0289217	2.34872	2.59612	11	CAPNS2	0.195287	E	G	0.164355
1544	0.64728	0.0313228	2.31181	2.5475	11	CAPRIN1	0.203903	B	G	0.169985
1545	0.773618	0.00521396	3.08783	3.66266	11	CAPRIN2	0.0706254	B	G	-0.0801403
1546	-0.124664	0.714958	-0.375947	0.376932	11	CAPS2	0.894253	K	G	0.0457241
1547	NA	NA	NA	NA	11	CAPSL	NA	C	G	0.127212
1548	0.0134145	0.968775	0.0402458	0.040247	11	CAPZA1	0.990404	B	G	0.132321
1549	0.150154	0.659451	0.453895	0.455628	11	CAPZA2	0.866927	B	G	0.0300939
1550	0.342791	0.302079	1.07175	1.0947	11	CAPZB	0.639276	D	G	0.125771
1551	0.716952	0.0130273	2.70403	3.08533	11	CARD10	0.121541	A	G	-0.12893
1552	-0.330211	0.321311	-1.02919	1.0495	11	CARD11	0.65696	C	G	0.0215077
1553	0.417216	0.20172	1.33295	1.37724	11	CARD19	0.543257	A	G	0.0820181
1554	-0.0314273	0.926915	-0.094313	0.0943286	11	CARD8	0.973987	X	G	-0.0742458
1555	-0.275362	0.412474	-0.84797	0.859307	11	CARD9	0.71267	A	G	-0.1967
1556	-0.130618	0.70187	-0.394105	0.39524	11	CARF	0.8881	X	G	0.33584
1557	0.350236	0.291001	1.09714	1.12176	11	CARHSP1	0.63409	A	G	-0.230161
1558	0.0685678	0.841232	0.206027	0.206189	11	CARM1	0.946704	D	G	0.0242517
1559	-0.66077	0.0268692	-2.38254	2.64101	11	CARMIL1	0.18708	B	G	0.245437
1560	0.74389	0.00866968	2.8774	3.33931	11	CARMIL2	0.0946746	A	G	0.439937
1561	-0.182994	0.590184	-0.555236	0.558411	11	CARNMT1	0.82983	E	G	0.0652872
1562	0.625332	0.039636	2.20114	2.40402	11	CARNS1	0.23386	I	G	-0.178597
1563	-0.71307	0.0137651	-2.6802	3.05125	11	CARS1	0.125857	X	G	-0.174037
1564	0.00248696	0.99421	0.0074609	0.0074609	11	CARS2	0.998552	X	G	0.0840963
1565	-0.721967	0.0121169	-2.73522	3.13024	11	CARTPT	0.11673	X	G	-0.0736
1566	0.388042	0.238293	1.22848	1.2631	11	CASC1	0.586001	C	G	0.0532582
1567	-0.16321	0.631589	-0.494047	0.496283	11	CASC3	0.851274	D	G	-0.0250432
1568	0.00475869	0.988921	0.0142762	0.0142762	11	CASD1	0.997029	D	G	-0.1541
1569	0.260468	0.439191	0.799832	0.809341	11	CASK	0.732792	A	G	0.0982647
1570	0.435586	0.180531	1.40031	1.45171	11	CASKIN1	0.519066	D	G	0.327179
1571	-0.124176	0.716033	-0.374462	0.375435	11	CASKIN2	0.89493	X	G	-0.112272
1572	0.0709931	0.835681	0.213338	0.213518	11	CASP2	0.944367	A	G	0.184618
1573	0.523902	0.0980964	1.74511	1.84521	11	CASP3	0.385723	B	G	0.276222
1574	0.660108	0.0270769	2.37901	2.63631	11	CASP6	0.187859	X	G	-0.0467813
1575	-0.0838208	0.806439	-0.252054	0.25235	11	CASP7	0.932276	X	G	-0.0399799
1576	0.143695	0.673384	0.434088	0.435605	11	CASP8AP2	0.873047	A	G	-0.0474122
1577	-0.130646	0.701808	-0.394192	0.395328	11	CASP9	0.8881	X	G	0.00413988
1578	0.294606	0.379166	0.910809	0.924866	11	CASQ2	0.695297	X	G	-0.0482695
1579	-0.250876	0.456819	-0.769041	0.777491	11	CASR	0.745853	X	G	0.204523
1580	0.0970271	0.776564	0.292	0.292461	11	CASS4	0.920533	C	G	-0.0853042
1581	0.371508	0.260611	1.17051	1.20044	11	CAST	0.610908	E	G	-0.075287
1582	0.86216	0.00064063	3.9051	5.10521	11	CASTOR1	0.0206842	D	G	0.158321
1583	-0.792783	0.00360783	-3.23664	3.90211	11	CASTOR2	0.0570858	A	G	-0.389835
1584	-0.623743	0.0402915	-2.19333	2.39401	11	CASZ1	0.235957	A	G	-0.179161
1585	0.0387269	0.909993	0.116239	0.116268	11	CAT	0.968114	A	G	-0.132537
1586	-0.636016	0.0354188	-2.25436	2.4726	11	CATIP	0.218661	C	G	0.00834635
1587	-0.151431	0.656708	-0.457815	0.459594	11	CAV1	0.86607	C	G	0.0632905
1588	0.538942	0.0871349	1.80799	1.91944	11	CAV2	0.362432	C	G	0.0993687
1589	0.0561827	0.869675	0.168726	0.168815	11	CAV3	0.955251	X	G	-0.213859
1590	-0.100756	0.768175	-0.303298	0.303815	11	CAVIN1	0.916949	X	G	0.334589
1591	-0.0776697	0.820436	-0.233479	0.233715	11	CAVIN2	0.937813	X	G	-0.0154404
1592	0.794617	0.00347622	3.2515	3.92655	11	CAVIN4	0.056148	B	G	0.0433315
1593	-0.793414	0.00356214	-3.24174	3.91048	11	CBARP	0.0569004	D	G	-0.249934
1594	-0.55601	0.0757141	-1.88112	2.00683	11	CBFA2T2	0.335756	F	G	-0.17035
1595	0.709955	0.0143785	2.66128	3.02432	11	CBFA2T3	0.12961	F	G	0.499284
1596	0.592904	0.054549	2.0464	2.20883	11	CBFB	0.280779	A	G	-0.0124052
1597	-0.215503	0.524518	-0.656804	0.662064	11	CBL	0.794539	A	G	0.156053
1598	0.63324	0.0364829	2.24042	2.45456	11	CBLB	0.22292	C	G	-0.100399
1599	-0.417338	0.201574	-1.33339	1.37773	11	CBLL1	0.543158	A	G	-0.0781506
1600	0.121744	0.721401	0.367053	0.367969	11	CBLN1	0.897181	X	G	-0.00530918
1601	0.527446	0.095436	1.7598	1.86248	11	CBLN2	0.379839	F	G	-0.154579
1602	-0.653368	0.0292536	-2.34346	2.58916	11	CBLN4	0.196122	X	G	-0.00385304
1603	-0.171336	0.614458	-0.519128	0.521723	11	CBR4	0.843248	A	G	-0.356288
1604	-0.0462945	0.892486	-0.138983	0.139033	11	CBWD1	0.962314	E	G	0.0329172
1605	0.257779	0.444099	0.791185	0.800388	11	CBX1	0.736201	B	G	0.141497
1606	0.195271	0.565023	0.593433	0.597311	11	CBX2	0.817504	X	G	0.180596
1607	-0.596884	0.0525404	-2.06488	2.23182	11	CBX3	0.275365	B	G	0.297835
1608	0.00579524	0.986508	0.0173859	0.017386	11	CBX4	0.9967	D	G	0.149463
1609	0.124812	0.714632	0.376398	0.377386	11	CBX5	0.894175	D	G	0.078997
1610	0.81129	0.00243686	3.39237	4.16299	11	CBX6	0.0450942	G	G	0.767318
1611	-0.660257	0.0270299	-2.37981	2.63737	11	CBX7	0.187809	B	G	0.382031
1612	-0.46094	0.153608	-1.49551	1.55823	11	CBX8	0.480292	A	G	0.0319866
1613	-0.646256	0.0316807	-2.30653	2.54058	11	CBY1	0.205236	B	G	0.30923
1614	0.522016	0.0995313	1.73732	1.83607	11	CBY2	0.388601	X	G	-0.00244553
1615	0.205959	0.54347	0.626844	0.631416	11	CC2D1A	0.804405	B	G	0.0831719
1616	-0.00214557	0.995005	-0.00643673	0.00643674	11	CC2D1B	0.998878	B	G	0.414343
1617	0.0528019	0.877465	0.158553	0.158627	11	CC2D2A	0.957591	X	G	0.0622886
1618	0.132684	0.697346	0.400412	0.401602	11	CCAR1	0.886126	A	G	-0.215416
1619	0.62587	0.0394158	2.20379	2.40741	11	CCBE1	0.233122	G	G	0.684044
1620	-0.320757	0.336184	-0.997472	1.01595	11	CCDC102A	0.669025	D	G	0.0907676
1621	0.189865	0.576049	0.576592	0.580148	11	CCDC103	0.822606	A	G	0.0591279
1622	0.231494	0.493402	0.707301	0.713872	11	CCDC107	0.771733	X	G	0.00111302
1623	0.441763	0.173725	1.42326	1.47725	11	CCDC112	0.509472	E	G	0.0582842
1624	-0.111549	0.744026	-0.336045	0.336749	11	CCDC115	0.906507	E	G	-0.144294
1625	-0.483934	0.131488	-1.58433	1.65901	11	CCDC117	0.443821	B	G	0.0137734
1626	0.326643	0.326881	1.0172	1.0368	11	CCDC12	0.661624	E	G	-0.0030134
1627	0.676379	0.0222971	2.46723	2.75491	11	CCDC122	0.16788	X	G	0.279538
1628	-0.472334	0.142377	-1.53921	1.60763	11	CCDC124	0.462145	D	G	-0.062741
1629	-0.0730864	0.830896	-0.219651	0.219847	11	CCDC125	0.942719	E	G	0.0274279
1630	-0.638138	0.03462	-2.26508	2.4865	11	CCDC126	0.21618	B	G	-0.0945128
1631	0.0296674	0.930999	0.0890282	0.0890413	11	CCDC127	0.975573	B	G	0.0124978
1632	0.0683586	0.841711	0.205396	0.205557	11	CCDC13	0.946809	X	G	-0.144023
1633	0.670174	0.0240427	2.43317	2.70885	11	CCDC134	0.175754	B	G	0.454192
1634	0.00757607	0.982363	0.0227286	0.0227288	11	CCDC137	0.995224	X	G	-0.0860181
1635	-0.00245118	0.994293	-0.00735355	0.00735356	11	CCDC138	0.998552	X	G	0.0793846
1636	-0.336245	0.312006	-1.04956	1.0711	11	CCDC14	0.648288	A	G	-0.0509574
1637	0.775747	0.00501349	3.1038	3.68792	11	CCDC141	0.0689024	F	G	0.484036
1638	-0.505922	0.112339	-1.6717	1.75957	11	CCDC142	0.410256	D	G	-0.139852
1639	0.852219	0.000863333	3.79261	4.88672	11	CCDC146	0.0247378	G	G	0.686547
1640	-0.405441	0.216049	-1.29043	1.33059	11	CCDC148	0.56093	A	G	-0.0774588
1641	0.647173	0.03136	2.31126	2.54678	11	CCDC149	0.203948	A	G	-0.0283187
1642	-0.0155453	0.963817	-0.0466397	0.0466416	11	CCDC15	0.987916	C	G	-0.0277524
1643	-0.36704	0.266838	-1.15499	1.18374	11	CCDC152	0.618939	X	G	0.0812174
1644	-0.0415666	0.903419	-0.124772	0.124808	11	CCDC158	0.965503	X	G	0.0926796
1645	0.282641	0.399713	0.871649	0.883964	11	CCDC166	0.703945	C	G	0.152503
1646	-0.0975593	0.775366	-0.293612	0.294081	11	CCDC167	0.920092	B	G	0.0914645
1647	0.043649	0.898602	0.13103	0.131072	11	CCDC17	0.96446	C	G	0.157724
1648	-0.137523	0.686782	-0.415201	0.416528	11	CCDC170	0.880031	C	G	0.179234
1649	0.670783	0.0238671	2.4365	2.71333	11	CCDC171	0.174995	E	G	0.177433
1650	-0.288675	0.389283	-0.891361	0.904534	11	CCDC172	0.695297	X	G	-0.0352141
1651	-0.442322	0.173116	-1.42534	1.47957	11	CCDC174	0.50895	A	G	-0.109635
1652	-0.190827	0.574081	-0.579586	0.583198	11	CCDC177	0.821482	B	G	0.228428
1653	-0.224505	0.506901	-0.685185	0.691157	11	CCDC178	0.780918	X	G	0.107618
1654	0.733343	0.0102238	2.80776	3.23601	11	CCDC18	0.105409	X	G	0.226916
1655	0.104204	0.760439	0.313752	0.314324	11	CCDC181	0.913753	A	G	0.335527
1656	-0.168129	0.621198	-0.509223	0.511672	11	CCDC183	0.846285	X	G	-0.142085
1657	0.0343045	0.920241	0.102954	0.102974	11	CCDC186	0.972019	D	G	-0.142492
1658	-0.549627	0.0798605	-1.85354	1.97374	11	CCDC187	0.345908	X	G	0.135499
1659	0.588705	0.0567248	2.02705	2.18485	11	CCDC191	0.286616	X	G	-0.0608811
1660	0.34641	0.296665	1.08408	1.10782	11	CCDC198	0.63409	X	G	0.103935
1661	0.296284	0.37633	0.916322	0.930637	11	CCDC25	0.695297	X	G	0.0580815
1662	-0.369895	0.262849	-1.16491	1.1944	11	CCDC27	0.613222	L	G	0.0740634
1663	0.541184	0.0855736	1.81748	1.93072	11	CCDC28A	0.359056	A	G	0.366857
1664	-0.425245	0.192284	-1.36223	1.40953	11	CCDC3	0.532309	A	G	-0.169844
1665	-0.359292	0.277834	-1.12822	1.155	11	CCDC30	0.628215	A	G	-0.019049
1666	0.0559455	0.870222	0.168012	0.1681	11	CCDC32	0.955438	D	G	0.173994
1667	0.159923	0.638564	0.483924	0.486025	11	CCDC34	0.855576	C	G	0.15381
1668	-0.0405529	0.905765	-0.121726	0.121759	11	CCDC39	0.966281	X	G	0.105145
1669	-0.203137	0.549129	-0.618007	0.622387	11	CCDC40	0.807673	X	G	-0.204606
1670	-0.00409776	0.99046	-0.0122933	0.0122934	11	CCDC42	0.997353	A	G	-0.15821
1671	-0.187694	0.580501	-0.569838	0.573271	11	CCDC43	0.824486	D	G	-0.109793
1672	-0.0405519	0.905767	-0.121723	0.121756	11	CCDC47	0.966281	A	G	-0.123358
1673	-0.108238	0.751414	-0.325991	0.326633	11	CCDC50	0.909756	A	G	-0.0405864
1674	-0.0723232	0.83264	-0.217349	0.217539	11	CCDC51	0.943251	A	G	-0.161655
1675	0.552211	0.0781638	1.86467	1.98708	11	CCDC57	0.342467	A	G	0.42016
1676	0.581222	0.0607474	1.99292	2.14277	11	CCDC58	0.297249	H	G	0.098573
1677	0.496809	0.120041	1.63518	1.71736	11	CCDC59	0.424864	X	G	0.224149
1678	0.444681	0.170564	1.43415	1.48941	11	CCDC6	0.505882	A	G	0.526609
1679	0.279202	0.405718	0.860448	0.872294	11	CCDC60	0.708114	X	G	0.0663833
1680	-0.0474953	0.889712	-0.142593	0.142647	11	CCDC61	0.960998	X	G	0.090256
1681	0.396665	0.22711	1.25906	1.29634	11	CCDC62	0.572155	X	G	0.132526
1682	-0.0776453	0.820491	-0.233406	0.233641	11	CCDC63	0.937813	X	G	0.0767015
1683	-0.312859	0.348884	-0.971134	0.988183	11	CCDC65	0.680356	C	G	0.0648765
1684	0.329721	0.322073	1.02755	1.04776	11	CCDC66	0.657314	X	G	0.0109293
1685	-0.16499	0.627821	-0.499537	0.501849	11	CCDC69	0.849154	X	G	0.0572261
1686	-0.320735	0.33622	-0.997398	1.01587	11	CCDC71	0.669025	A	G	-0.0982067
1687	-0.479904	0.135209	-1.56858	1.64103	11	CCDC71L	0.450659	X	G	0.074826
1688	0.134795	0.692731	0.406862	0.40811	11	CCDC73	0.883034	B	G	0.0910859
1689	-0.252958	0.452965	-0.775711	0.784384	11	CCDC77	0.742998	A	G	-0.0992775
1690	-0.236406	0.48401	-0.722892	0.729908	11	CCDC78	0.766401	A	G	-0.11917
1691	0.711788	0.0140153	2.67239	3.04012	11	CCDC80	0.127483	C	G	0.45578
1692	0.891316	0.000229703	4.28488	5.89778	11	CCDC82	0.0118941	G	G	0.690049
1693	-0.334207	0.315133	-1.04267	1.06379	11	CCDC83	0.651345	A	G	-0.196634
1694	0.48077	0.134404	1.57196	1.64488	11	CCDC84	0.449465	X	G	0.0982217
1695	-0.723331	0.0118776	-2.74379	3.14263	11	CCDC85A	0.115462	B	G	-0.242729
1696	-0.860245	0.0006797	-3.88286	5.06145	11	CCDC85C	0.0213962	C	G	-0.26872
1697	0.516251	0.104004	1.71364	1.80837	11	CCDC86	0.396143	A	G	0.0615364
1698	0.759504	0.00669511	2.98512	3.50269	11	CCDC88A	0.0809807	B	G	-0.170831
1699	0.259597	0.440779	0.797028	0.806438	11	CCDC88C	0.733629	F	G	-0.236829
1700	0.0304486	0.929186	0.091374	0.0913881	11	CCDC89	0.974889	C	G	0.112272
1701	0.319959	0.337455	0.994806	1.01314	11	CCDC90B	0.669794	B	G	0.160449
1702	0.629467	0.0379646	2.2216	2.43029	11	CCDC91	0.227754	D	G	-0.106184
1703	0.427854	0.189276	1.3718	1.42011	11	CCDC92	0.529231	A	G	0.264086
1704	-0.641859	0.0332502	-2.28399	2.51111	11	CCDC93	0.21092	A	G	-0.168283
1705	0.222985	0.509856	0.680387	0.686235	11	CCDC9B	0.783055	C	G	0.417577
1706	-0.268001	0.425579	-0.824125	0.83453	11	CCK	0.723139	B	G	0.245264
1707	-0.268814	0.424121	-0.826755	0.837259	11	CCKAR	0.721936	X	G	-0.00280021
1708	0.666517	0.0251154	2.41335	2.6822	11	CCKBR	0.17987	A	G	0.212142
1709	0.355203	0.283737	1.11416	1.13994	11	CCL17	0.63409	C	G	0.0493398
1710	-0.168573	0.620264	-0.510592	0.513061	11	CCL19	0.845745	C	G	-0.0862578
1711	0.0750966	0.826305	0.225715	0.225928	11	CCL20	0.940428	A	G	-0.233767
1712	-0.21251	0.530432	-0.647396	0.652432	11	CCL28	0.798645	X	G	-0.121409
1713	-0.375408	0.255243	-1.18411	1.2151	11	CCM2	0.606236	D	G	-0.116287
1714	0.240749	0.475774	0.736708	0.744134	11	CCM2L	0.760508	L	G	0.00398764
1715	-0.746833	0.00826868	-2.89726	3.36911	11	CCN1	0.0915379	C	G	0.055206
1716	0.450095	0.164795	1.45446	1.51211	11	CCN2	0.496906	C	G	-0.0831138
1717	-0.64173	0.0332969	-2.28333	2.51025	11	CCN3	0.210997	X	G	0.0152519
1718	-0.115355	0.735558	-0.347611	0.348389	11	CCN4	0.903613	C	G	-0.133027
1719	-0.817842	0.00209964	-3.45079	4.26371	11	CCN5	0.0415282	B	G	0.00963088
1720	0.351971	0.288452	1.10308	1.1281	11	CCN6	0.63409	X	G	-0.0442227
1721	0.763082	0.00629367	3.01066	3.54207	11	CCNA1	0.0782242	G	G	0.75582
1722	0.307528	0.357593	0.953439	0.969571	11	CCNA2	0.68729	X	G	0.0224609
1723	0.659963	0.0271223	2.37824	2.63529	11	CCNB2	0.187859	X	G	0.200875
1724	-0.389822	0.235959	-1.23477	1.26993	11	CCNB3	0.583228	B	G	0.264019
1725	-0.37883	0.250586	-1.19608	1.22802	11	CCNC	0.600343	X	G	0.109607
1726	0.659444	0.027286	2.37549	2.63162	11	CCND1	0.188417	C	G	-0.0266057
1727	-0.832313	0.00147908	-3.58686	4.50463	11	CCND2	0.0339632	C	G	-0.162264
1728	0.540971	0.085721	1.81658	1.92965	11	CCND3	0.359233	X	G	0.0535173
1729	-0.385221	0.242019	-1.21853	1.25231	11	CCNDBP1	0.590636	J	G	-0.0176969
1730	-0.654686	0.0288183	-2.35037	2.5983	11	CCNE1	0.194982	B	G	0.132107
1731	0.166974	0.623633	0.505656	0.508054	11	CCNE2	0.846964	X	G	0.0967722
1732	-0.537498	0.0881502	-1.80189	1.9122	11	CCNF	0.364919	A	G	-0.0186294
1733	-0.206503	0.542384	-0.628548	0.633156	11	CCNG1	0.804042	B	G	0.465764
1734	-0.574388	0.0645862	-1.96214	2.10506	11	CCNG2	0.307316	A	G	-0.207577
1735	-0.23649	0.48385	-0.723159	0.730183	11	CCNH	0.766401	E	G	0.13556
1736	0.117367	0.731091	0.353732	0.354552	11	CCNI	0.902127	B	G	-0.167515
1737	-0.695945	0.017383	-2.57818	2.90746	11	CCNJ	0.145328	A	G	-0.143792
1738	-0.0293478	0.931741	-0.0880687	0.0880814	11	CCNK	0.975736	B	G	-0.133283
1739	0.0945463	0.782157	0.284489	0.284915	11	CCNL1	0.922867	A	G	-0.0300251
1740	-0.0646127	0.850299	-0.194109	0.194244	11	CCNL2	0.949802	A	G	-0.117071
1741	-0.308838	0.355443	-0.957781	0.974134	11	CCNO	0.6853	A	G	0.158739
1742	-0.233813	0.488958	-0.714658	0.721436	11	CCNT1	0.769389	D	G	-0.0759616
1743	0.48856	0.127299	1.6025	1.6798	11	CCNT2	0.436669	A	G	0.230989
1744	-0.787512	0.00400667	-3.19454	3.83342	11	CCNY	0.0604214	A	G	-0.201606
1745	-0.884137	0.000303056	-4.18322	5.6769	11	CCNYL1	0.0137297	B	G	-0.190185
1746	0.620621	0.0416018	2.17804	2.37449	11	CCP110	0.240466	A	G	0.330706
1747	-0.23033	0.495639	-0.703614	0.710082	11	CCPG1	0.77315	A	G	-0.246445
1748	0.425002	0.192566	1.36134	1.40855	11	CCR10	0.532654	X	G	0.0181921
1749	-0.376598	0.253618	-1.18827	1.21958	11	CCR4	0.604283	X	G	-0.108249
1750	0.164933	0.627943	0.499359	0.501669	11	CCR5	0.849205	X	G	0.141316
1751	-0.14884	0.662278	-0.449862	0.45155	11	CCR6	0.868211	L	G	-0.13457
1752	0.188239	0.579383	0.571531	0.574995	11	CCR7	0.823974	X	G	-0.104394
1753	0.382858	0.245167	1.21021	1.24331	11	CCR9	0.59416	F	G	-0.10817
1754	-0.581992	0.0603246	-1.99641	2.14706	11	CCSAP	0.296228	F	G	-0.0151041
1755	0.789912	0.00382126	3.21359	3.86441	11	CCSER1	0.0587649	A	G	-0.0436673
1756	0.728797	0.0109524	2.77847	3.19307	11	CCSER2	0.109934	A	G	-0.117135
1757	0.20603	0.54333	0.627065	0.631641	11	CCT2	0.804405	A	G	0.0434838
1758	0.149624	0.660591	0.452268	0.453983	11	CCT3	0.867647	A	G	0.042083
1759	0.1117	0.743688	0.336505	0.337211	11	CCT4	0.906507	A	G	0.0908105
1760	0.654489	0.0288831	2.34933	2.59693	11	CCT5	0.195117	A	G	0.458311
1761	0.0868256	0.79962	0.261134	0.261464	11	CCT7	0.92898	D	G	0.113811
1762	-0.423877	0.193872	-1.35723	1.404	11	CCT8	0.534475	B	G	-0.212679
1763	0.256735	0.446012	0.78783	0.796917	11	CCZ1	0.737852	A	G	0.089425
1764	-0.475071	0.139759	-1.5498	1.61966	11	CD101	0.457857	X	G	-0.0974643
1765	0.526481	0.0961557	1.75579	1.85776	11	CD109	0.381494	A	G	0.496796
1766	-0.362954	0.272605	-1.14085	1.16855	11	CD14	0.623611	C	G	0.0518456
1767	-0.117529	0.730732	-0.354225	0.355048	11	CD151	0.901855	I	G	-0.159022
1768	0.409338	0.211242	1.30445	1.34594	11	CD164	0.554718	A	G	0.43139
1769	-0.878206	0.00037603	-4.10361	5.5085	11	CD164L2	0.0153114	B	G	-0.00245253
1770	0.446737	0.168359	1.44185	1.498	11	CD180	0.502231	X	G	0.0100372
1771	0.131461	0.700024	0.396677	0.397834	11	CD2	0.88727	C	G	0.156167
1772	0.00255877	0.994043	0.00767634	0.00767634	11	CD24	0.998552	B	G	0.514706
1773	-0.0341497	0.9206	-0.102489	0.102509	11	CD247	0.972143	E	G	0.055713
1774	-0.127205	0.709364	-0.383693	0.38474	11	CD274	0.89136	E	G	-0.0247572
1775	-0.225921	0.504153	-0.689659	0.69575	11	CD28	0.779509	X	G	0.105863
1776	-0.58426	0.0590916	-2.00672	2.15975	11	CD2AP	0.293199	A	G	-0.0090549
1777	0.283051	0.398999	0.872987	0.88536	11	CD320	0.703612	X	G	-0.0270517
1778	-0.163585	0.630794	-0.495204	0.497455	11	CD34	0.850908	J	G	-0.169375
1779	-0.298205	0.373094	-0.922644	0.937258	11	CD36	0.695297	X	G	0.0129114
1780	0.351299	0.289437	1.10078	1.12564	11	CD38	0.63409	C	G	0.0911132
1781	0.326832	0.326585	1.01783	1.03747	11	CD3E	0.661291	X	G	-0.053307
1782	-0.12385	0.716753	-0.373467	0.374432	11	CD4	0.895273	A	G	-0.0993337
1783	-0.707452	0.0148854	-2.6462	3.00294	11	CD40	0.132604	B	G	0.0924463
1784	0.304777	0.362132	0.944333	0.960005	11	CD40LG	0.691725	X	G	-0.107012
1785	0.142492	0.675989	0.430405	0.431883	11	CD44	0.874811	C	G	-0.0711907
1786	-0.741566	0.00899617	-2.86185	3.31609	11	CD47	0.096769	B	G	-0.330826
1787	0.448603	0.166373	1.44885	1.50583	11	CD5	0.498856	X	G	0.11022
1788	0.459465	0.155101	1.4899	1.5519	11	CD58	0.482547	A	G	0.0228629
1789	0.853125	0.000840917	3.80257	4.90578	11	CD59	0.0243382	A	G	-0.256767
1790	-0.288675	0.389283	-0.891361	0.904534	11	CD6	0.695297	X	G	-0.146081
1791	0.0596951	0.861594	0.179298	0.179405	11	CD7	0.952826	X	G	-0.0223908
1792	-0.345106	0.298609	-1.07963	1.10309	11	CD74	0.635838	C	G	0.0562392
1793	0.664773	0.0256388	2.40396	2.66961	11	CD79B	0.181897	X	G	0.138835
1794	-0.37094	0.261397	-1.16854	1.19831	11	CD80	0.611956	C	G	-0.0303759
1795	-0.723589	0.0118327	-2.74541	3.14498	11	CD81	0.115206	B	G	-0.0931116
1796	0.759296	0.00671893	2.98365	3.50043	11	CD82	0.0809807	F	G	0.602342
1797	0.418852	0.199775	1.3389	1.38379	11	CD83	0.541063	G	G	0.531994
1798	-0.473887	0.140887	-1.54521	1.61445	11	CD84	0.45951	D	G	-0.0485622
1799	-0.00427096	0.990057	-0.012813	0.012813	11	CD86	0.997295	C	G	0.123442
1800	-0.131251	0.700483	-0.396037	0.397188	11	CD8B	0.887456	A	G	-0.106611
1801	-0.379944	0.249081	-1.19998	1.23224	11	CD9	0.598595	I	G	-0.105322
1802	0.145907	0.668601	0.440868	0.442457	11	CD93	0.87093	X	G	-0.118387
1803	-0.468693	0.145907	-1.52518	1.59174	11	CD96	0.469097	A	G	-0.132952
1804	-0.380831	0.247885	-1.20309	1.2356	11	CD99	0.597448	C	G	0.017461
1805	0.874994	0.00042073	4.062	5.42202	11	CD99L2	0.0165293	F	G	0.0115977
1806	-0.170651	0.615895	-0.517012	0.519575	11	CDA	0.843694	X	G	0.00226799
1807	0.751176	0.00770178	2.92695	3.41391	11	CDADC1	0.0871323	G	G	0.531368
1808	0.674417	0.0228389	2.45641	2.74023	11	CDAN1	0.170655	A	G	0.102789
1809	-0.257167	0.445221	-0.789217	0.798352	11	CDC123	0.73721	B	G	0.0330652
1810	-0.89253	0.000218775	-4.30269	5.93718	11	CDC14A	0.0116112	A	G	-0.291436
1811	0.383927	0.24374	1.21397	1.24738	11	CDC14B	0.592846	E	G	0.31767
1812	-0.613164	0.0448498	-2.14193	2.3286	11	CDC16	0.251098	D	G	-0.229443
1813	0.34641	0.296665	1.08408	1.10782	11	CDC20B	0.63409	X	G	0.057861
1814	0.0708594	0.835987	0.212935	0.213114	11	CDC23	0.944618	A	G	0.0120128
1815	0.636108	0.035384	2.25483	2.4732	11	CDC25A	0.218588	X	G	-0.0645521
1816	0.0775496	0.820709	0.233117	0.233351	11	CDC26	0.93783	B	G	0.0492909
1817	0.287746	0.390879	0.888323	0.901361	11	CDC27	0.696601	A	G	0.142671
1818	0.150894	0.657861	0.456165	0.457925	11	CDC34	0.866351	I	G	-0.218694
1819	0.563218	0.0712075	1.9126	2.04482	11	CDC37L1	0.325384	E	G	0.151409
1820	-0.828468	0.00162834	-3.5497	4.43794	11	CDC40	0.0358752	A	G	-0.208643
1821	0.188444	0.578961	0.572172	0.575647	11	CDC42	0.823824	A	G	0.239132
1822	0.463992	0.150546	1.50716	1.57137	11	CDC42BPA	0.475316	X	G	0.123086
1823	-0.0852316	0.803236	-0.256317	0.256629	11	CDC42BPB	0.930553	I	G	0.186239
1824	0.196209	0.563117	0.59636	0.600296	11	CDC42EP1	0.816555	X	G	-0.119974
1825	-0.408485	0.212289	-1.30137	1.34257	11	CDC42EP3	0.556399	A	G	0.155098
1826	-0.006182	0.985608	-0.0185462	0.0185464	11	CDC42EP4	0.996507	C	G	0.00649271
1827	-0.745044	0.00851081	-2.88516	3.35094	11	CDC42SE1	0.093447	D	G	-0.0713669
1828	-0.781318	0.00451598	-3.14623	3.75553	11	CDC42SE2	0.0649778	B	G	0.164417
1829	0.00102905	0.997604	0.00308714	0.00308715	11	CDC45	0.999487	X	G	0.313419
1830	-0.0411441	0.904397	-0.123502	0.123537	11	CDC5L	0.966064	X	G	0.0813654
1831	0.125566	0.71297	0.378697	0.379703	11	CDC6	0.892838	X	G	0.00327025
1832	0.160128	0.638129	0.484553	0.486663	11	CDC7	0.855389	X	G	0.308738
1833	-0.643996	0.0324806	-2.29492	2.52538	11	CDC73	0.20794	B	G	0.0596687
1834	-0.197269	0.560969	-0.599667	0.603668	11	CDCA2	0.815181	X	G	0.0257413
1835	0.518308	0.102393	1.72207	1.81821	11	CDCA3	0.393732	X	G	0.309979
1836	-0.626951	0.0389757	-2.20913	2.41426	11	CDCA7	0.231541	B	G	0.147056
1837	0.770721	0.00549599	3.06631	3.62879	11	CDCA7L	0.0727775	C	G	0.230723
1838	0.589767	0.0561693	2.03192	2.19088	11	CDCA8	0.285222	X	G	0.127451
1839	-0.590166	0.0559611	-2.03376	2.19316	11	CDCP1	0.28476	X	G	-0.0694832
1840	0.798146	0.003233	3.28045	3.97441	11	CDCP2	0.0535241	G	G	0.628744
1841	0.311435	0.351199	0.9664	0.983201	11	CDH10	0.681737	C	G	0.134867
1842	0.574472	0.064538	1.96252	2.10551	11	CDH11	0.307262	C	G	-0.0103224
1843	0.714467	0.0134961	2.68875	3.06345	11	CDH12	0.124664	C	G	0.167474
1844	-0.340619	0.305353	-1.06438	1.08685	11	CDH13	0.643057	B	G	0.448111
1845	-0.32587	0.328095	-1.0146	1.03406	11	CDH15	0.662254	X	G	-0.19408
1846	-0.661924	0.0265104	-2.38869	2.64921	11	CDH17	0.185416	A	G	-0.165605
1847	0.744623	0.00856848	2.88233	3.34669	11	CDH19	0.0938752	I	G	-0.310205
1848	-0.77224	0.00534673	-3.07756	3.64648	11	CDH2	0.0719876	B	G	0.322297
1849	0.619786	0.041957	2.17397	2.3693	11	CDH20	0.241297	A	G	-0.240148
1850	-0.864671	0.000592007	-3.9347	5.16387	11	CDH22	0.019847	B	G	0.090332
1851	0.41581	0.203399	1.32785	1.37163	11	CDH23	0.545605	C	G	-0.071451
1852	-0.840811	0.00118573	-3.6718	4.6597	11	CDH4	0.0297023	B	G	-0.183933
1853	0.385375	0.241816	1.21907	1.2529	11	CDH5	0.590393	A	G	-0.0537033
1854	-0.647091	0.0313886	-2.31083	2.54622	11	CDH8	0.204066	C	G	-0.27916
1855	0.936842	2.13605e-05	5.13475	8.03572	11	CDH9	0.00296321	C	G	0.512211
1856	0.311927	0.350399	0.968035	0.984921	11	CDHR1	0.6813	C	G	-0.0814842
1857	-0.0660412	0.847022	-0.198412	0.198557	11	CDHR2	0.948815	X	G	0.0615581
1858	-0.136766	0.688432	-0.412885	0.41419	11	CDHR3	0.881104	X	G	0.100949
1859	-0.0227411	0.947086	-0.068235	0.0682409	11	CDHR4	0.981705	C	G	0.138578
1860	-0.544427	0.0833479	-1.83128	1.94715	11	CDHR5	0.354374	A	G	-0.152061
1861	-0.0845601	0.80476	-0.254287	0.254592	11	CDIP1	0.93124	D	G	-0.0475426
1862	0.474066	0.140716	1.54591	1.61524	11	CDK1	0.459348	X	G	0.291871
1863	0.189835	0.576111	0.576497	0.580052	11	CDK10	0.822636	A	G	-0.00138895
1864	0.10671	0.754828	0.321355	0.32197	11	CDK12	0.910707	B	G	-0.0992904
1865	0.0517301	0.879937	0.155329	0.155398	11	CDK13	0.957645	A	G	-0.14502
1866	-0.759292	0.00671949	-2.98362	3.50038	11	CDK14	0.0809807	B	G	0.235135
1867	-0.29532	0.377958	-0.913153	0.927319	11	CDK15	0.695297	X	G	-0.0862977
1868	-0.844804	0.00106406	-3.71316	4.73655	11	CDK17	0.0275111	B	G	-0.124125
1869	-0.51961	0.101382	-1.72742	1.82447	11	CDK18	0.39225	A	G	-0.214146
1870	0.351294	0.289445	1.10076	1.12562	11	CDK19	0.63409	X	G	0.225723
1871	0.632687	0.0366976	2.23765	2.45098	11	CDK2	0.223553	B	G	0.254238
1872	-0.0583744	0.864631	-0.175322	0.175422	11	CDK20	0.953944	X	G	-0.0230393
1873	0.473052	0.141687	1.54198	1.61078	11	CDK2AP1	0.461205	A	G	0.260846
1874	-0.280383	0.40365	-0.864293	0.876298	11	CDK2AP2	0.706836	D	G	-0.148255
1875	0.171762	0.613564	0.520446	0.52306	11	CDK3	0.842581	J	G	-0.108079
1876	0.018701	0.956478	0.0561095	0.0561127	11	CDK5	0.98524	X	G	-0.131985
1877	-0.304516	0.362565	-0.943468	0.959097	11	CDK5R1	0.691864	A	G	-0.0889602
1878	-0.341784	0.303594	-1.06833	1.09106	11	CDK5R2	0.641155	D	G	-0.0163989
1879	-0.293765	0.380593	-0.908046	0.921975	11	CDK5RAP1	0.695297	B	G	-0.130476
1880	-0.540968	0.0857229	-1.81657	1.92963	11	CDK5RAP2	0.359233	A	G	-0.333214
1881	-0.0317903	0.926073	-0.095403	0.0954191	11	CDK5RAP3	0.973772	D	G	-0.074459
1882	0.91446	8.09298e-05	4.66232	6.77921	11	CDK6	0.00633425	A	G	-0.0961725
1883	-0.549449	0.0799784	-1.85277	1.97282	11	CDK7	0.346266	E	G	-0.0123527
1884	-0.846583	0.00101302	-3.7319	4.77166	11	CDK8	0.0266712	B	G	-0.0951544
1885	-0.37495	0.255871	-1.18251	1.21337	11	CDK9	0.607189	A	G	-0.262156
1886	-0.370779	0.261621	-1.16798	1.19771	11	CDKAL1	0.611991	D	G	-0.075776
1887	-0.207928	0.539538	-0.633015	0.637723	11	CDKL1	0.803138	C	G	0.00771483
1888	0.10067	0.768369	0.303037	0.303553	11	CDKL2	0.916949	X	G	-0.020799
1889	-0.525303	0.0970391	-1.75091	1.85202	11	CDKL5	0.38326	A	G	-0.273488
1890	0.827104	0.00168392	3.5367	4.41476	11	CDKN1A	0.0366185	F	G	0.450491
1891	-0.450528	0.16434	-1.45609	1.51393	11	CDKN1B	0.4962	X	G	-0.339986
1892	-0.490414	0.125644	-1.60981	1.68819	11	CDKN1C	0.434612	X	G	0.106111
1893	-0.571561	0.066221	-1.94951	2.08965	11	CDKN2AIP	0.311952	B	G	0.169419
1894	0.933707	2.64406e-05	5.05967	7.82354	11	CDKN2C	0.00325294	X	G	0.158357
1895	0.0931255	0.785364	0.280188	0.280596	11	CDKN3	0.923944	X	G	0.105686
1896	0.776299	0.00496252	3.10796	3.69452	11	CDO1	0.0686528	C	G	0.61186
1897	-0.792755	0.0036099	-3.23641	3.90173	11	CDON	0.0570858	C	G	-0.147486
1898	0.608854	0.0468048	2.12129	2.30254	11	CDR2	0.257598	A	G	0.359278
1899	0.376838	0.253291	1.18911	1.22049	11	CDR2L	0.604096	A	G	0.0341683
1900	0.502181	0.115461	1.65666	1.74215	11	CDS1	0.416049	C	G	-0.0923519
1901	-0.411244	0.208914	-1.31132	1.35348	11	CDS2	0.551578	X	G	-0.230019
1902	0.384106	0.243502	1.2146	1.24806	11	CDT1	0.592696	G	G	0.43233
1903	-0.703222	0.0157712	-2.62094	2.96731	11	CDV3	0.137044	B	G	-0.246522
1904	0.221105	0.513525	0.674452	0.680148	11	CDX2	0.785915	X	G	0.0803827
1905	0.581737	0.0604645	1.99525	2.14564	11	CDYL	0.296307	G	G	0.472101
1906	-0.531677	0.092323	-1.77744	1.88327	11	CDYL2	0.373439	X	G	-0.0462267
1907	0.277578	0.408568	0.855168	0.866797	11	CEBPA	0.710315	C	G	0.202294
1908	0.0382912	0.911002	0.11493	0.114958	11	CEBPB	0.968644	A	G	-0.132746
1909	-0.359499	0.277536	-1.12893	1.15577	11	CEBPD	0.628215	C	G	-0.00795115
1910	-0.19487	0.565838	-0.592182	0.596035	11	CEBPG	0.817737	A	G	-0.0241662
1911	0.637004	0.0350451	2.25935	2.47907	11	CEBPZ	0.217437	H	G	0.23465
1912	0.400967	0.221647	1.2744	1.31308	11	CEL	0.566336	X	G	0.00261379
1913	-0.783175	0.00435851	-3.16059	3.77858	11	CELF1	0.0636058	B	G	-0.108862
1914	-0.771269	0.00544183	-3.07036	3.63515	11	CELF2	0.0723922	A	G	-0.219204
1915	-0.401415	0.221083	-1.276	1.31483	11	CELF3	0.566023	A	G	-0.171324
1916	-0.909739	0.000102346	-4.57802	6.57356	11	CELF4	0.00719823	B	G	-0.0492965
1917	-0.747195	0.00822021	-2.89972	3.37281	11	CELF5	0.0911017	B	G	0.122546
1918	-0.465101	0.149445	-1.5114	1.57615	11	CELF6	0.473398	B	G	0.277971
1919	-0.220441	0.514822	-0.672359	0.678002	11	CELSR1	0.786674	C	G	-0.102871
1920	0.413837	0.205772	1.3207	1.36377	11	CELSR2	0.548298	D	G	0.0954707
1921	-0.431013	0.185673	-1.38342	1.43297	11	CELSR3	0.525624	B	G	0.337048
1922	-0.805874	0.00274472	-3.34544	4.08323	11	CEMIP	0.048515	X	G	-0.412456
1923	0.282486	0.399982	0.871145	0.883439	11	CEMIP2	0.704109	E	G	0.15382
1924	0.396641	0.227141	1.25897	1.29625	11	CEND1	0.572155	D	G	-0.0610686
1925	0.647521	0.0312391	2.31305	2.54913	11	CENPC	0.203674	A	G	0.106255
1926	0.812783	0.00235667	3.40553	4.18553	11	CENPE	0.0444694	G	G	0.889999
1927	0.451135	0.163702	1.45837	1.51649	11	CENPF	0.495988	X	G	0.246275
1928	0.449179	0.165763	1.45102	1.50826	11	CENPH	0.49818	E	G	0.163713
1929	0.192107	0.571466	0.583572	0.587259	11	CENPI	0.820606	C	G	0.141251
1930	0.00124732	0.997096	0.00374197	0.00374197	11	CENPJ	0.999332	A	G	0.219769
1931	0.759859	0.00665439	2.98765	3.50657	11	CENPK	0.0805858	E	G	0.237903
1932	0.491555	0.124633	1.61432	1.69337	11	CENPL	0.432762	X	G	0.40272
1933	0.225968	0.504062	0.689808	0.695902	11	CENPM	0.779492	C	G	0.398992
1934	0.747495	0.00818029	2.90176	3.37588	11	CENPN	0.0907593	X	G	0.208547
1935	0.400948	0.221671	1.27433	1.313	11	CENPP	0.566336	X	G	0.290128
1936	-0.0823947	0.809679	-0.247746	0.248028	11	CENPQ	0.933549	X	G	0.0911315
1937	0.253082	0.452735	0.776111	0.784797	11	CENPS	0.742802	X	G	0.144162
1938	-0.505412	0.112761	-1.66964	1.75718	11	CENPT	0.41098	A	G	-0.0246962
1939	0.86644	0.000559458	3.95586	5.20613	11	CENPU	0.0191061	C	G	0.282739
1940	0.095998	0.778883	0.288884	0.28933	11	CENPV	0.921771	X	G	-0.0195541
1941	0.441346	0.174178	1.4217	1.47552	11	CENPW	0.509985	F	G	-0.00538679
1942	-0.0912138	0.789684	-0.274404	0.274787	11	CENPX	0.925476	X	G	-0.0672289
1943	-0.372301	0.259514	-1.17328	1.20341	11	CEP104	0.609685	X	G	-0.118266
1944	-0.510287	0.108765	-1.68935	1.78006	11	CEP112	0.405197	A	G	-0.449452
1945	-0.0381129	0.911415	-0.114394	0.114422	11	CEP120	0.968659	E	G	0.068575
1946	-0.0678817	0.842804	-0.203959	0.204116	11	CEP126	0.947307	A	G	-0.0162985
1947	0.221834	0.512101	0.676751	0.682506	11	CEP128	0.784518	A	G	0.0665305
1948	-0.276555	0.410369	-0.851843	0.863336	11	CEP131	0.711526	D	G	0.0263979
1949	0.643264	0.0327429	2.29116	2.52048	11	CEP135	0.208778	A	G	-0.13333
1950	0.703104	0.0157966	2.62024	2.96632	11	CEP152	0.13706	A	G	0.0617956
1951	0.20196	0.551495	0.614325	0.618628	11	CEP162	0.80893	A	G	-0.145652
1952	0.609921	0.0463155	2.12638	2.30896	11	CEP164	0.256098	X	G	0.113206
1953	0.812343	0.00238011	3.40164	4.17886	11	CEP170	0.0445548	X	G	0.31495
1954	0.480487	0.134667	1.57085	1.64362	11	CEP170B	0.44996	C	G	0.283299
1955	0.447138	0.167931	1.44335	1.49968	11	CEP19	0.501103	X	G	0.143051
1956	0.293214	0.381529	0.906238	0.920084	11	CEP192	0.695297	A	G	0.0263671
1957	0.286936	0.392275	0.885673	0.898595	11	CEP20	0.697718	A	G	-0.0717355
1958	0.287607	0.39112	0.887865	0.900884	11	CEP250	0.696857	A	G	0.00438752
1959	0.611053	0.0458	2.1318	2.3158	11	CEP290	0.254407	A	G	0.0102235
1960	-0.504694	0.113358	-1.66675	1.75383	11	CEP295	0.412257	X	G	-0.0514233
1961	-0.768572	0.00571245	-3.05049	3.60401	11	CEP350	0.0739896	A	G	-0.356144
1962	0.125388	0.713363	0.378153	0.379155	11	CEP41	0.893147	E	G	0.258101
1963	-0.0192164	0.95528	-0.0576562	0.0576597	11	CEP43	0.984802	C	G	0.0547397
1964	-0.0522831	0.878661	-0.156992	0.157064	11	CEP44	0.957645	X	G	0.107992
1965	0.681784	0.0208519	2.49732	2.7959	11	CEP55	0.162121	X	G	0.230523
1966	-0.545666	0.0825079	-1.83657	1.95345	11	CEP57	0.352891	B	G	0.0455533
1967	-0.704609	0.0154768	-2.62919	2.97892	11	CEP57L1	0.135723	A	G	-0.208362
1968	-0.11545	0.735346	-0.347901	0.348682	11	CEP63	0.903463	X	G	-0.0277376
1969	0.696449	0.0172676	2.58111	2.91155	11	CEP68	0.145087	B	G	0.223987
1970	-0.0337867	0.921442	-0.101399	0.101418	11	CEP76	0.972143	A	G	0.0276446
1971	0.152172	0.655119	0.460089	0.461895	11	CEP78	0.865469	E	G	0.0560574
1972	-0.628974	0.0381611	-2.21915	2.42714	11	CEP83	0.22866	A	G	-0.303114
1973	0.306038	0.360048	0.948505	0.964387	11	CEP85	0.68942	D	G	0.0991059
1974	-0.548452	0.0806395	-1.8485	1.9677	11	CEP85L	0.347635	A	G	-0.308606
1975	0.269601	0.422713	0.8293	0.839902	11	CEP89	0.720582	A	G	-0.00523471
1976	-0.605588	0.0483245	-2.10578	2.283	11	CEP95	0.262222	A	G	0.0392644
1977	-0.693361	0.0179826	-2.5632	2.88663	11	CEP97	0.147882	B	G	-0.0116469
1978	-0.092384	0.787039	-0.277944	0.278342	11	CEPT1	0.924484	B	G	-0.187728
1979	-0.581374	0.0606638	-1.99361	2.14361	11	CER1	0.297043	E	G	-0.155268
1980	0.211093	0.53324	0.642946	0.647879	11	CERCAM	0.800125	I	G	-0.271425
1981	0.767685	0.00580352	3.044	3.59388	11	CERK	0.0745674	X	G	0.0926323
1982	-0.671872	0.0235556	-2.44244	2.72135	11	CERKL	0.174076	A	G	0.0121783
1983	0.352035	0.288359	1.10329	1.12833	11	CERS1	0.63409	B	G	-0.308876
1984	-0.246407	0.46514	-0.754752	0.762739	11	CERS2	0.752747	I	G	-0.240336
1985	-0.463169	0.151369	-1.50401	1.56781	11	CERS3	0.476559	X	G	-0.253514
1986	-0.263217	0.434199	-0.808686	0.818515	11	CERS4	0.730017	X	G	-0.0230011
1987	0.0322363	0.925038	0.0967423	0.0967591	11	CERS5	0.973361	A	G	-0.0362657
1988	0.138367	0.684946	0.41778	0.419132	11	CERS6	0.878988	B	G	0.571646
1989	-0.532153	0.0919769	-1.77943	1.88562	11	CERT1	0.372996	A	G	-0.143953
1990	0.0184019	0.957173	0.0552121	0.0552152	11	CES2	0.985557	A	G	0.328969
1991	-0.33264	0.317548	-1.03738	1.05818	11	CETN2	0.653501	X	G	0.00684495
1992	0.652697	0.0294765	2.33995	2.58454	11	CETN3	0.196756	E	G	0.474989
1993	0.565045	0.0700947	1.92064	2.05456	11	CETP	0.322349	X	G	0.120639
1994	-0.177932	0.60068	-0.539538	0.542452	11	CFAP100	0.835484	X	G	0.0384108
1995	-0.260355	0.439397	-0.799468	0.808964	11	CFAP161	0.732814	A	G	-0.0225357
1996	0.848307	0.00096531	3.75025	4.80623	11	CFAP20	0.0262489	F	G	0.513282
1997	-0.0279367	0.935017	-0.0838319	0.0838428	11	CFAP206	0.977692	X	G	0.0406746
1998	0.337786	0.309653	1.05477	1.07664	11	CFAP20DC	0.646488	F	G	-0.139861
1999	-0.389631	0.236209	-1.2341	1.2692	11	CFAP221	0.583529	C	G	0.0836769
[truncated: 18,791 more rows]

## Sheet: female_vl_suppl
	cor	p	Z	t	nObs	gene_id	q	me_assigned	module	membership
1	0.164542	0.672268	0.439332	0.441354	9	A1CF	0.917593	X	G	0.128427
2	0.376252	0.318267	1.04689	1.07442	9	A2M	0.806304	X	G	-0.0520214
3	-0.0648741	0.868302	-0.171882	0.172003	9	A4GNT	0.970129	J	G	0.10048
4	-0.106484	0.785113	-0.282801	0.28334	9	AAAS	0.947732	D	G	-0.0767147
5	0.646092	0.060113	2.03342	2.2396	9	AACS	0.551012	A	G	0.274721
6	0.533135	0.139402	1.57294	1.66725	9	AADAC	0.699613	X	G	0.108282
7	0.463902	0.208447	1.32889	1.38547	9	AADAT	0.742256	A	G	0.0191371
8	-0.454565	0.218968	-1.29758	1.35023	9	AAGAB	0.74904	C	G	-0.286006
9	0.569591	0.109384	1.71158	1.83349	9	AAK1	0.660058	A	G	0.541977
10	0.0672827	0.863449	0.178283	0.178418	9	AAMDC	0.9686	B	G	-0.119138
11	-0.338716	0.372586	-0.933002	0.95246	9	AAMP	0.835751	A	G	-0.22531
12	0.187276	0.62946	0.501403	0.50441	9	AANAT	0.904474	X	G	0.0804673
13	-0.444419	0.230725	-1.26394	1.31256	9	AAR2	0.760515	A	G	0.312057
14	0.290621	0.448054	0.791727	0.803596	9	AARS1	0.868323	A	G	0.00344072
15	-0.0195361	0.960214	-0.0516941	0.0516974	9	AARS2	0.991035	X	G	-0.0906305
16	0.736044	0.0237606	2.49175	2.87678	9	AASDH	0.413427	A	G	-0.148327
17	-0.226245	0.558307	-0.609127	0.614523	9	AASDHPPT	0.880099	D	G	-0.109198
18	0.092022	0.813852	0.244158	0.244505	9	AASS	0.956085	X	G	0.0502014
19	0.0925887	0.812722	0.24567	0.246023	9	AATF	0.955896	A	G	-0.271955
20	-0.0655094	0.867022	-0.17357	0.173695	9	AATK	0.969983	B	G	-0.0907826
21	-0.0130619	0.973394	-0.0345605	0.0345615	9	ABAT	0.993178	A	G	-0.287355
22	0.603188	0.0855109	1.84711	2.00086	9	ABCA1	0.616564	A	G	-0.100629
23	0.351486	0.353639	0.971358	0.993327	9	ABCA12	0.825802	X	G	-0.0949454
24	0.524207	0.147416	1.54015	1.62862	9	ABCA13	0.699613	F	G	-0.0375708
25	0.350814	0.354625	0.969328	0.991159	9	ABCA2	0.82743	D	G	0.0129349
26	-0.270251	0.481866	-0.733229	0.742651	9	ABCA3	0.870586	A	G	-0.140886
27	0.192668	0.61944	0.516203	0.519484	9	ABCA4	0.900987	A	G	-0.0121087
28	0.396711	0.290455	1.11053	1.14342	9	ABCA5	0.795522	B	G	0.099596
29	0.797135	0.010089	2.88574	3.49291	9	ABCA7	0.301946	B	G	-0.00474567
30	0.553725	0.121916	1.65025	1.75936	9	ABCB1	0.681248	X	G	-0.230712
31	0.205498	0.595816	0.551551	0.555554	9	ABCB10	0.893323	D	G	0.15171
32	0.703503	0.0344599	2.31292	2.61899	9	ABCB11	0.467725	F	G	0.511437
33	0.0273928	0.944231	0.0724927	0.0725018	9	ABCB5	0.988293	X	G	0.0951411
34	-0.302287	0.429171	-0.825567	0.839029	9	ABCB6	0.861522	D	G	0.0983547
35	-0.00281598	0.994263	-0.00745039	0.0074504	9	ABCB7	0.999008	A	G	-0.234906
36	-0.18782	0.628446	-0.502896	0.50593	9	ABCB8	0.903912	D	G	-0.0082112
37	-0.250942	0.514858	-0.678417	0.685876	9	ABCB9	0.870586	A	G	-0.0698881
38	-0.627901	0.0702016	-1.95242	2.13451	9	ABCC10	0.576919	A	G	-0.211093
39	0.0209525	0.957331	0.0554433	0.0554474	9	ABCC2	0.990821	A	G	-0.0788967
40	-0.197436	0.610625	-0.529317	0.532855	9	ABCC3	0.898148	C	G	-0.16822
41	0.884636	0.00153122	3.69532	5.01955	9	ABCC4	0.146465	C	G	0.341055
42	0.325179	0.393182	0.89275	0.909787	9	ABCC5	0.847529	D	G	0.0545772
43	0.664112	0.0510735	2.11696	2.35019	9	ABCC8	0.525193	C	G	0.0703036
44	0.0593637	0.87942	0.157246	0.157339	9	ABCC9	0.972846	C	G	-0.101405
45	0.243136	0.528444	0.656422	0.663177	9	ABCD2	0.873998	X	G	0.0539976
46	0.0814134	0.835059	0.215877	0.216117	9	ABCD3	0.960811	B	G	-0.122601
47	0.770021	0.0152101	2.69967	3.19314	9	ABCD4	0.350566	A	G	0.0405186
48	0.519266	0.151964	1.52219	1.60757	9	ABCE1	0.699613	X	G	0.401898
49	-0.34849	0.358041	-0.962324	0.983683	9	ABCF1	0.829114	B	G	-0.0404871
50	-0.0928925	0.812116	-0.246481	0.246838	9	ABCF2	0.955896	I	G	-0.157804
51	0.0258577	0.947352	0.0684284	0.068436	9	ABCG1	0.989026	A	G	-0.16337
52	0.077875	0.842154	0.206456	0.206666	9	ABCG2	0.962556	A	G	0.034274
53	0.080439	0.837012	0.213282	0.213513	9	ABCG4	0.960836	D	G	-0.295046
54	0.523054	0.148471	1.53595	1.62369	9	ABCG5	0.699613	A	G	-0.0262509
55	-0.390483	0.298784	-1.09103	1.12221	9	ABCG8	0.798573	A	G	0.114304
56	0.129274	0.740286	0.343951	0.344921	9	ABHD10	0.93569	B	G	-0.135572
57	0.604433	0.0846943	1.8523	2.00737	9	ABHD11	0.615099	B	G	0.24342
58	0.509155	0.161524	1.48582	1.56516	9	ABHD12	0.699613	B	G	-0.180517
59	-0.347793	0.35907	-0.960225	0.981444	9	ABHD12B	0.829114	A	G	0.0531173
60	-0.319011	0.402738	-0.874541	0.890554	9	ABHD13	0.850494	D	G	0.0531348
61	0.000189863	0.999613	0.00050233	0.00050233	9	ABHD14A	0.99993	X	G	-0.0154077
62	0.0326981	0.933447	0.086542	0.0865575	9	ABHD14B	0.986016	X	G	-0.0200421
63	0.0308735	0.937155	0.0817096	0.0817226	9	ABHD15	0.986914	X	G	0.00739078
64	-0.350466	0.355135	-0.968279	0.990039	9	ABHD17A	0.827431	D	G	0.0127765
65	0.362025	0.338362	1.00331	1.02753	9	ABHD17B	0.816777	E	G	0.249788
66	-0.184346	0.634926	-0.493375	0.496239	9	ABHD17C	0.906326	A	G	-0.304179
67	-0.0634181	0.871238	-0.168014	0.168127	9	ABHD18	0.970382	D	G	-0.082994
68	0.272786	0.477601	0.74047	0.750174	9	ABHD2	0.870586	A	G	-0.194455
69	0.0233343	0.952485	0.0617478	0.0617534	9	ABHD5	0.989239	B	G	0.154167
70	-0.497633	0.172829	-1.44499	1.51791	9	ABHD6	0.702099	B	G	-0.211972
71	-0.121479	0.755547	-0.322999	0.323802	9	ABHD8	0.940775	D	G	0.0843732
72	-0.139996	0.71942	-0.372842	0.374077	9	ABI1	0.930444	B	G	0.168435
73	-0.390052	0.299366	-1.08968	1.12075	9	ABI2	0.79868	B	G	0.0832245
74	0.41766	0.263331	1.17697	1.21618	9	ABI3	0.780559	X	G	0.0393666
75	0.083564	0.830752	0.221606	0.221866	9	ABI3BP	0.960674	I	G	-0.127943
76	0.372889	0.322963	1.03654	1.06326	9	ABITRAM	0.807908	A	G	-0.165405
77	0.580866	0.100972	1.75617	1.888	9	ABL1	0.645316	X	G	-0.0359171
78	0.519324	0.151911	1.5224	1.60782	9	ABL2	0.699613	C	G	-0.0907756
79	0.692678	0.0386104	2.25705	2.54095	9	ABLIM1	0.482347	A	G	-0.152278
80	0.673995	0.046508	2.1643	2.41388	9	ABLIM2	0.513528	B	G	0.537537
81	0.118997	0.760424	0.316335	0.317089	9	ABLIM3	0.941473	D	G	0.245956
82	-0.307322	0.421133	-0.840253	0.854449	9	ABR	0.859672	A	G	0.265228
83	0.582497	0.0997893	1.76269	1.89601	9	ABRA	0.643296	X	G	0.27139
84	0.185172	0.633384	0.495636	0.49854	9	ABRACL	0.90606	A	G	-0.0223059
85	0.814471	0.00751497	3.01661	3.71402	9	ABRAXAS1	0.27033	A	G	-0.00259427
86	0.646969	0.0596516	2.03741	2.24483	9	ABRAXAS2	0.549654	A	G	-0.0423865
87	-0.0790728	0.839751	-0.209645	0.209864	9	ABT1	0.96156	B	G	0.18594
88	0.196369	0.612592	0.526382	0.529861	9	ABTB1	0.899405	B	G	-0.233834
89	0.474818	0.19651	1.36593	1.42742	9	ABTB2	0.730932	A	G	-0.230669
90	0.0802791	0.837333	0.212857	0.213086	9	ACAA1	0.961032	X	G	0.103562
91	-0.0962273	0.805474	-0.255384	0.25578	9	ACAA2	0.953613	E	G	0.084749
92	-0.092549	0.812801	-0.245564	0.245917	9	ACACA	0.955896	A	G	-0.292758
93	0.411315	0.2714	1.1567	1.19391	9	ACACB	0.785085	X	G	0.0411979
94	0.493565	0.176925	1.43072	1.50148	9	ACAD10	0.706291	X	G	-0.136266
95	0.200054	0.605802	0.536529	0.540214	9	ACAD11	0.89755	L	G	0.0851409
96	0.503037	0.167472	1.46406	1.53993	9	ACAD8	0.699613	X	G	0.172735
97	-0.14588	0.708035	-0.388737	0.390137	9	ACAD9	0.927519	X	G	0.0366082
98	0.68699	0.040915	2.22834	2.50129	9	ACADL	0.490101	X	G	-0.121478
99	0.194879	0.615347	0.52228	0.525679	9	ACADM	0.899757	A	G	-0.244502
100	0.549176	0.12566	1.63296	1.73863	9	ACADS	0.686128	X	G	0.0881301
101	0.19743	0.610635	0.529301	0.532839	9	ACADSB	0.898148	X	G	-0.155616
102	0.699321	0.0360273	2.29114	2.58843	9	ACAN	0.472418	X	G	0.376322
103	0.473566	0.197858	1.36166	1.42257	9	ACAP2	0.731597	C	G	0.0400078
104	-0.646791	0.0597448	-2.0366	2.24377	9	ACAP3	0.549795	B	G	0.089248
105	0.721691	0.0281602	2.41072	2.75841	9	ACAT1	0.436375	E	G	0.0949666
106	-0.0393501	0.91994	-0.104164	0.104191	9	ACAT2	0.982486	D	G	0.224769
107	-0.394773	0.293034	-1.10445	1.13681	9	ACBD3	0.795522	A	G	-0.291861
108	0.208077	0.591107	0.558677	0.562838	9	ACBD4	0.892066	D	G	-0.00431032
109	0.305328	0.424309	0.834429	0.848331	9	ACBD5	0.860036	A	G	-0.261246
110	-0.0790297	0.839838	-0.20953	0.209749	9	ACBD6	0.96156	X	G	-0.173212
111	-0.206228	0.594481	-0.553568	0.557616	9	ACBD7	0.893295	B	G	-0.111234
112	0.578353	0.102812	1.74615	1.87571	9	ACCS	0.648582	A	G	0.0463492
113	0.370285	0.326622	1.02854	1.05465	9	ACE	0.809158	X	G	0.606508
114	-0.111276	0.775637	-0.295633	0.296248	9	ACE2	0.946388	C	G	-0.0809607
115	0.0249109	0.949278	0.0659218	0.0659286	9	ACER1	0.989145	X	G	-0.0870259
116	-0.586008	0.0972708	-1.77679	1.91339	9	ACER2	0.639081	E	G	0.00793554
117	0.140062	0.719292	0.373021	0.374258	9	ACER3	0.930444	X	G	-0.0277634
118	0.190579	0.623316	0.510465	0.513638	9	ACKR2	0.901908	X	G	-0.0148469
119	0.897662	0.0010201	3.86293	5.38933	9	ACKR3	0.128664	G	G	0.547773
120	0.242654	0.529286	0.655069	0.661782	9	ACKR4	0.874178	A	G	0.0927895
121	0.311904	0.413878	0.85366	0.868549	9	ACLY	0.855938	A	G	-0.000570149
122	-0.494212	0.17627	-1.43299	1.50408	9	ACMSD	0.70536	A	G	0.0943829
123	0.502334	0.168163	1.46157	1.53706	9	ACO1	0.699613	E	G	0.0579142
124	-0.294015	0.442525	-0.801544	0.813862	9	ACO2	0.866574	D	G	-0.229028
125	-0.13298	0.733056	-0.353929	0.354985	9	ACOD1	0.934325	A	G	-0.174641
126	0.572709	0.107018	1.72382	1.8484	9	ACOT11	0.65495	G	G	0.361692
127	0.381842	0.310541	1.06416	1.09308	9	ACOT12	0.805518	E	G	0.00421618
128	0.558054	0.118416	1.66683	1.7793	9	ACOT13	0.675086	X	G	0.0652142
129	0.0329665	0.932902	0.0872529	0.0872687	9	ACOT7	0.986016	A	G	0.114354
130	-0.192413	0.619912	-0.515504	0.518772	9	ACOT8	0.901113	X	G	0.0442504
131	0.349973	0.355859	0.966793	0.988453	9	ACOT9	0.827627	D	G	0.283906
132	0.298521	0.435228	0.814614	0.827546	9	ACOX1	0.862541	A	G	-0.20122
133	0.302174	0.429353	0.825237	0.838683	9	ACOX2	0.861566	X	G	0.1242
134	0.42598	0.252946	1.20375	1.24571	9	ACOX3	0.774244	A	G	-0.0397452
135	-0.0175048	0.964349	-0.0463181	0.0463205	9	ACP1	0.991552	B	G	0.00190066
136	0.326917	0.390508	0.897896	0.915231	9	ACP2	0.84583	A	G	-0.0167031
137	0.668965	0.0487976	2.14006	2.38118	9	ACP5	0.516899	X	G	-0.0685701
138	0.521225	0.150152	1.5293	1.61589	9	ACP6	0.699613	A	G	0.407371
139	0.0250698	0.948955	0.0663423	0.0663492	9	ACRBP	0.989145	E	G	-0.0871341
140	0.229859	0.551865	0.619214	0.624882	9	ACSBG1	0.879946	X	G	-0.0833171
141	-0.134149	0.730778	-0.357078	0.358163	9	ACSBG2	0.933689	A	G	0.169076
142	-0.0339923	0.930818	-0.0899698	0.0899871	9	ACSF2	0.986016	G	G	0.497086
143	-0.104226	0.789585	-0.276762	0.277267	9	ACSF3	0.948296	X	G	0.136625
144	0.547735	0.12686	1.62751	1.73211	9	ACSL1	0.68993	G	G	0.706277
145	0.670907	0.0479052	2.14938	2.39373	9	ACSL3	0.514607	D	G	0.123574
146	-0.594455	0.0913724	-1.81109	1.95588	9	ACSL4	0.628653	B	G	0.12579
147	0.143813	0.712029	0.383149	0.38449	9	ACSL5	0.927794	X	G	-0.0750479
148	0.813507	0.00764483	3.00905	3.70101	9	ACSL6	0.27033	B	G	0.12521
149	0.338352	0.373133	0.931915	0.951304	9	ACSS1	0.835751	A	G	-0.120752
150	0.377941	0.315923	1.0521	1.08005	9	ACSS2	0.806039	B	G	-0.139485
151	0.465505	0.20667	1.33429	1.39158	9	ACSS3	0.740622	X	G	0.248413
152	-0.443081	0.2323	-1.25953	1.30765	9	ACTA1	0.761004	X	G	-0.0752382
153	-0.317443	0.405183	-0.869926	0.885685	9	ACTA2	0.851273	X	G	-0.136568
154	0.561466	0.1157	1.67998	1.79516	9	ACTB	0.669282	D	G	0.431596
155	0.687907	0.0405374	2.23294	2.50763	9	ACTC1	0.48932	X	G	-0.0672488
156	0.172123	0.657895	0.459975	0.462295	9	ACTG1	0.913708	D	G	0.132206
157	-0.209058	0.589318	-0.561392	0.565614	9	ACTG2	0.892044	X	G	-0.090501
158	0.582299	0.0999327	1.76189	1.89504	9	ACTL10	0.643296	A	G	0.109265
159	0.381284	0.311307	1.06243	1.09122	9	ACTL6A	0.805518	A	G	-0.0127594
160	-0.23328	0.545794	-0.628776	0.634711	9	ACTL6B	0.878936	X	G	-0.0335255
161	-0.312805	0.412459	-0.856301	0.871329	9	ACTN1	0.855007	B	G	0.0316416
162	-0.514999	0.155957	-1.50678	1.58957	9	ACTN2	0.699613	X	G	-0.10745
163	-0.315836	0.407697	-0.8652	0.880703	9	ACTR10	0.853078	X	G	-0.0621853
164	-0.241822	0.530744	-0.652728	0.65937	9	ACTR1A	0.87447	A	G	0.159201
165	-0.301419	0.430565	-0.823038	0.836377	9	ACTR2	0.861852	B	G	0.0564766
166	0.0615826	0.874941	0.163139	0.163242	9	ACTR3	0.971342	A	G	-0.216615
167	-0.651601	0.0572501	-2.0586	2.27269	9	ACTR3B	0.541509	A	G	-0.277153
168	0.00647034	0.986819	0.0171192	0.0171193	9	ACTR5	0.99705	A	G	-0.113491
169	-0.369687	0.327465	-1.02671	1.05268	9	ACTR6	0.809158	B	G	-0.125982
170	-0.575965	0.104579	-1.73668	1.86411	9	ACTR8	0.650925	B	G	-0.0633977
171	-0.254715	0.508341	-0.689082	0.696899	9	ACVR1	0.870586	B	G	0.134251
172	0.194604	0.615855	0.521526	0.52491	9	ACVR1B	0.899846	D	G	0.100244
173	-0.343375	0.365619	-0.94695	0.967297	9	ACVR1C	0.831491	X	G	-0.0884239
174	0.538013	0.135134	1.59104	1.68868	9	ACVR2A	0.696887	A	G	-0.225947
175	0.33516	0.377946	0.922387	0.941186	9	ACVR2B	0.836766	C	G	-0.0771887
176	-0.0343606	0.93007	-0.0909454	0.0909633	9	ACVRL1	0.985769	D	G	-0.130916
177	0.0105234	0.978564	0.0278434	0.0278439	9	ACYP1	0.994526	A	G	0.0555848
178	0.466094	0.206018	1.33629	1.39383	9	ACYP2	0.740335	A	G	-0.232302
179	0.882598	0.00162466	3.67072	4.96701	9	ADA	0.148594	X	G	-0.0435261
180	0.739664	0.0227275	2.51277	2.90793	9	ADA2	0.406179	A	G	-0.098288
181	0.121967	0.75459	0.324309	0.325122	9	ADAD1	0.94075	X	G	-0.0745403
182	0.732701	0.0247418	2.47254	2.84849	9	ADAL	0.4174	X	G	0.14372
183	0.384912	0.306338	1.07368	1.10339	9	ADAM10	0.80265	A	G	0.194834
184	0.336679	0.375653	0.926917	0.945995	9	ADAM12	0.836502	X	G	0.0899182
185	-0.300934	0.431343	-0.821628	0.834898	9	ADAM15	0.861913	D	G	-0.140464
186	0.371268	0.325239	1.03156	1.05789	9	ADAM17	0.809079	A	G	-0.200446
187	0.735054	0.0240486	2.48604	2.86835	9	ADAM19	0.41428	C	G	0.261662
188	-0.230678	0.55041	-0.621501	0.627232	9	ADAM22	0.879946	A	G	-0.356337
189	0.849388	0.0037556	3.31764	4.25805	9	ADAM23	0.209639	F	G	0.387806
190	0.393772	0.294371	1.10131	1.13339	9	ADAM28	0.795578	X	G	0.00951405
191	-0.431663	0.245981	-1.22217	1.26611	9	ADAM8	0.771096	A	G	-0.0690709
192	0.45852	0.214476	1.3108	1.36509	9	ADAM9	0.74534	B	G	-0.117922
193	0.229236	0.552973	0.617474	0.623095	9	ADAMTS1	0.879946	I	G	-0.154807
194	-0.0801232	0.837645	-0.212442	0.21267	9	ADAMTS10	0.961276	X	G	-0.17108
195	0.580186	0.101468	1.75345	1.88466	9	ADAMTS12	0.645316	A	G	-0.0126333
196	0.46239	0.210131	1.32379	1.37973	9	ADAMTS13	0.743375	X	G	0.0524884
197	0.587605	0.0961388	1.78324	1.92135	9	ADAMTS14	0.636019	C	G	0.125278
198	0.417314	0.263769	1.17586	1.21496	9	ADAMTS15	0.780559	B	G	0.431263
199	0.38122	0.311396	1.06223	1.091	9	ADAMTS17	0.805518	C	G	-0.193632
200	-0.0212945	0.956636	-0.0563484	0.0563527	9	ADAMTS18	0.990821	C	G	-0.0442543
201	0.0430993	0.912335	0.114101	0.114136	9	ADAMTS19	0.982008	X	G	-0.0341385
202	0.590817	0.0938849	1.79626	1.93746	9	ADAMTS2	0.633336	C	G	0.0143791
203	0.221507	0.566796	0.595929	0.600981	9	ADAMTS20	0.881844	C	G	-0.215067
204	-0.216267	0.576237	-0.581368	0.586058	9	ADAMTS3	0.885574	F	G	-0.156898
205	-0.604487	0.084659	-1.85252	2.00765	9	ADAMTS5	0.615099	A	G	-0.273751
206	0.433828	0.243353	1.22922	1.27393	9	ADAMTS6	0.768823	A	G	-0.0832448
207	-0.0935334	0.810839	-0.248192	0.248556	9	ADAMTS7	0.955722	C	G	-0.134474
208	-0.248142	0.519715	-0.670517	0.677718	9	ADAMTS8	0.871421	B	G	0.0714093
209	-0.107007	0.784076	-0.284202	0.284749	9	ADAMTS9	0.947732	C	G	-0.06657
210	0.859195	0.00299707	3.41371	4.44294	9	ADAMTSL1	0.192345	C	G	0.164429
211	-0.545447	0.128779	-1.61888	1.7218	9	ADAMTSL2	0.690259	A	G	0.00137297
212	0.458717	0.214254	1.31146	1.36583	9	ADAMTSL3	0.745112	C	G	0.0728465
213	0.582485	0.0997977	1.76264	1.89596	9	ADAMTSL5	0.643296	X	G	-0.0938217
214	-0.682925	0.0426152	-2.20808	2.47348	9	ADAP1	0.500305	A	G	0.280127
215	0.75715	0.0181541	2.61797	3.0666	9	ADAP2	0.37373	C	G	0.121152
216	0.230043	0.551538	0.619727	0.62541	9	ADAR	0.879946	A	G	0.13743
217	0.63072	0.0685736	1.96476	2.1504	9	ADARB1	0.5736	F	G	0.0741258
218	-0.10762	0.782863	-0.285844	0.2864	9	ADARB2	0.94768	F	G	-0.150762
219	0.469817	0.201929	1.3489	1.4081	9	ADAT1	0.735551	A	G	0.120347
220	0.229235	0.552975	0.617471	0.623092	9	ADAT2	0.879946	A	G	0.0315466
221	-0.516518	0.15453	-1.51225	1.59595	9	ADCK1	0.699613	A	G	-0.184335
222	0.322926	0.396659	0.886091	0.902749	9	ADCK2	0.849396	A	G	-0.157764
223	0.472862	0.19862	1.35925	1.41984	9	ADCY1	0.731927	C	G	-0.0699683
224	0.812809	0.00773984	3.00359	3.69164	9	ADCY2	0.270649	A	G	0.31119
225	0.877877	0.0018561	3.61525	4.85011	9	ADCY5	0.160758	A	G	-0.268971
226	-0.344154	0.36446	-0.949287	0.969787	9	ADCY6	0.831404	D	G	0.135205
227	0.6359	0.0656444	1.98765	2.17996	9	ADCY7	0.567043	A	G	-0.0993156
228	-0.58121	0.100722	-1.75754	1.88969	9	ADCY8	0.645316	B	G	0.149436
229	0.311316	0.414806	0.851938	0.866736	9	ADCY9	0.856169	A	G	0.465518
230	-0.858361	0.00305707	-3.40531	4.42652	9	ADCYAP1	0.195224	C	G	-0.231546
231	-0.547213	0.127296	-1.62553	1.72975	9	ADCYAP1R1	0.690064	A	G	0.000145626
232	-0.484555	0.186193	-1.39939	1.46556	9	ADD1	0.717024	X	G	-0.0037984
233	-0.276744	0.470974	-0.751798	0.761956	9	ADD2	0.870586	D	G	0.00234426
234	0.112654	0.772916	0.299325	0.299964	9	ADD3	0.946012	F	G	0.159044
235	0.167478	0.666691	0.447319	0.449453	9	ADGB	0.916692	A	G	-0.102938
236	-0.664555	0.050863	-2.11906	2.35299	9	ADGRA1	0.524103	D	G	-0.149505
237	-0.161857	0.677382	-0.432032	0.433955	9	ADGRA2	0.918449	X	G	-0.0768177
238	0.447165	0.22751	1.273	1.32269	9	ADGRA3	0.758397	A	G	-0.0699392
239	-0.150615	0.698912	-0.401544	0.403087	9	ADGRB1	0.925373	X	G	-0.0271025
240	-0.207436	0.592275	-0.556907	0.561028	9	ADGRB2	0.892821	D	G	-0.236465
241	-0.404932	0.279646	-1.13644	1.17171	9	ADGRB3	0.789927	B	G	-0.046049
242	-0.0282003	0.942589	-0.0746307	0.0746406	9	ADGRD1	0.987996	X	G	-0.102706
243	0.360979	0.339864	1.00012	1.02411	9	ADGRD2	0.817867	X	G	-0.124066
244	0.484846	0.185889	1.4004	1.46671	9	ADGRF4	0.717024	X	G	-0.0359428
245	0.22159	0.566647	0.59616	0.601217	9	ADGRF5	0.881844	A	G	-0.220655
246	0.890332	0.00128998	3.76629	5.17358	9	ADGRG1	0.14058	X	G	0.269909
247	0.836135	0.00497676	3.19656	4.03301	9	ADGRG2	0.230429	G	G	0.846
248	0.353249	0.351061	0.976682	0.999016	9	ADGRG3	0.823464	L	G	-0.0030488
249	0.0519403	0.894426	0.137545	0.137607	9	ADGRG6	0.976945	A	G	0.104516
250	0.863113	0.00272609	3.45383	4.52186	9	ADGRL2	0.182822	A	G	-0.300791
251	-0.117488	0.763391	-0.312287	0.313013	9	ADGRL3	0.942546	B	G	0.139382
252	0.652237	0.0569253	2.06152	2.27655	9	ADGRL4	0.540467	A	G	-0.208673
253	0.350142	0.35561	0.967303	0.988997	9	ADGRV1	0.827627	B	G	0.0499537
254	0.543722	0.130238	1.61239	1.71406	9	ADHFE1	0.690332	A	G	-0.022409
255	0.459192	0.213718	1.31305	1.36762	9	ADI1	0.744861	A	G	-0.1073
256	NA	NA	NA	NA	9	ADIG	NA	X	G	-0.110075
257	-0.625298	0.0717261	-1.94108	2.11996	9	ADIPOQ	0.583943	X	G	-0.0787104
258	-0.0385412	0.921582	-0.102021	0.102046	9	ADIPOR1	0.982869	D	G	0.0802412
259	0.087653	0.822574	0.232505	0.232804	9	ADIPOR2	0.958799	I	G	-0.262345
260	0.882095	0.00164828	3.66472	4.95426	9	ADK	0.149553	A	G	-0.0251377
261	0.0371417	0.924423	0.0983128	0.0983355	9	ADM	0.983631	X	G	0.0110811
262	0.1989	0.607925	0.53335	0.53697	9	ADM2	0.89755	X	G	-0.092201
263	0.240539	0.532995	0.649124	0.655656	9	ADNP	0.875272	A	G	-0.0563102
264	0.645264	0.0605511	2.02966	2.23468	9	ADNP2	0.552662	A	G	-0.16665
265	0.0565815	0.88504	0.149861	0.149941	9	ADO	0.974456	D	G	0.195271
266	-0.192367	0.619998	-0.515377	0.518642	9	ADORA2A	0.901113	A	G	-0.248203
267	0.208306	0.59069	0.559311	0.563486	9	ADORA2B	0.892044	B	G	-0.0468016
268	0.343471	0.365476	0.947238	0.967605	9	ADORA3	0.831491	A	G	0.224338
269	-0.40454	0.280157	-1.1352	1.17035	9	ADPGK	0.790668	A	G	0.344575
270	0.0411194	0.91635	0.108853	0.108884	9	ADPRH	0.982076	I	G	0.0882956
271	-0.127689	0.743383	-0.339687	0.340621	9	ADPRHL1	0.936758	A	G	-0.170533
272	0.427921	0.250555	1.21003	1.25266	9	ADPRM	0.773221	X	G	0.160393
273	0.189377	0.625549	0.507166	0.510278	9	ADPRS	0.902809	X	G	0.0263407
274	0.395829	0.291627	1.10776	1.14041	9	ADRA1A	0.795522	C	G	-0.0131523
275	-0.194891	0.615325	-0.522313	0.525712	9	ADRA1B	0.899757	X	G	-0.123549
276	0.31318	0.411867	0.857403	0.872489	9	ADRA1D	0.854888	F	G	-0.141658
277	0.292218	0.445449	0.796342	0.808421	9	ADRA2A	0.867821	F	G	-0.171443
278	0.0114697	0.976637	0.0303473	0.030348	9	ADRA2C	0.994037	A	G	-0.273057
279	-0.612366	0.0796058	-1.88562	2.04936	9	ADRB1	0.603043	A	G	-0.209415
280	0.0797456	0.838402	0.211436	0.211661	9	ADRB2	0.9615	D	G	0.0179358
281	-0.25	0.51649	-0.675759	0.68313	9	ADRB3	0.870586	X	G	0.0153017
282	0.123603	0.751382	0.328704	0.32955	9	ADRM1	0.939417	X	G	0.0662211
283	-0.208265	0.590764	-0.559197	0.56337	9	ADSL	0.892044	A	G	-0.179363
284	0.865125	0.00259377	3.47484	4.5636	9	ADSS1	0.180784	G	G	0.73233
285	0.532422	0.140032	1.57031	1.66414	9	ADSS2	0.699613	C	G	0.140557
286	-0.13879	0.721759	-0.369589	0.370792	9	ADTRP	0.93144	B	G	0.248004
287	0.383126	0.308779	1.06814	1.09739	9	AEBP1	0.805144	X	G	-0.141002
288	-0.258609	0.501651	-0.700111	0.70831	9	AEBP2	0.870586	B	G	0.0892106
289	0.064425	0.869208	0.170689	0.170807	9	AEN	0.970382	A	G	0.0323535
290	0.190984	0.622564	0.511577	0.514771	9	AFAP1	0.901657	X	G	0.134083
291	0.0437624	0.91099	0.115858	0.115895	9	AFAP1L1	0.981452	I	G	-0.0554779
292	0.138593	0.72214	0.369059	0.370257	9	AFAP1L2	0.931468	C	G	-0.176834
293	0.740183	0.0225818	2.51581	2.91244	9	AFDN	0.404295	C	G	0.0362046
294	0.666742	0.049832	2.12944	2.36691	9	AFF1	0.521294	A	G	-0.0703773
295	0.774872	0.0141891	2.73149	3.24325	9	AFF2	0.340741	A	G	0.629066
296	0.750097	0.0199171	2.57478	3.00089	9	AFF3	0.3855	A	G	-0.00602419
297	0.713567	0.0308719	2.3664	2.69477	9	AFF4	0.453844	A	G	-0.162686
298	0.248371	0.519317	0.671163	0.678385	9	AFG1L	0.871191	A	G	-0.0764691
299	0.429165	0.249029	1.21406	1.25712	9	AFG3L2	0.772049	B	G	-0.27689
300	0.0348404	0.929095	0.0922164	0.0922351	9	AFMID	0.985413	A	G	0.124417
301	-0.191057	0.622427	-0.511779	0.514977	9	AFTPH	0.901657	A	G	-0.185749
302	0.398166	0.288526	1.1151	1.14841	9	AGA	0.795182	A	G	-0.0566947
303	-0.0698416	0.858297	-0.185085	0.185236	9	AGAP1	0.967103	A	G	-0.208627
304	-0.659187	0.0534516	-2.09378	2.31927	9	AGAP2	0.531931	A	G	-0.294936
305	-0.202142	0.601965	-0.542287	0.546092	9	AGAP3	0.896211	H	G	0.193845
306	-0.349848	0.356042	-0.966416	0.98805	9	AGBL1	0.827627	B	G	-0.149407
307	0.71688	0.0297465	2.38434	2.72044	9	AGBL2	0.447135	C	G	0.107156
308	0.143529	0.712578	0.382383	0.383716	9	AGBL5	0.927794	D	G	0.134081
309	0.472856	0.198626	1.35923	1.41982	9	AGFG1	0.731927	A	G	-0.119044
310	0.196244	0.612825	0.526035	0.529508	9	AGGF1	0.899441	E	G	0.097515
311	0.448101	0.22642	1.2761	1.32616	9	AGK	0.757606	D	G	0.139145
312	0.657987	0.0540414	2.08817	2.31182	9	AGL	0.531931	X	G	0.103401
313	-0.0358923	0.926959	-0.095003	0.0950234	9	AGMAT	0.98471	X	G	-0.0253546
314	-0.455064	0.218399	-1.29925	1.3521	9	AGMO	0.748622	A	G	-0.217252
315	0.140876	0.717714	0.375218	0.376477	9	AGO2	0.929597	X	G	-0.212832
316	-0.291738	0.446231	-0.794955	0.806971	9	AGO3	0.867874	C	G	-0.327374
317	-0.274782	0.474255	-0.746178	0.756109	9	AGPAT2	0.870586	B	G	0.276005
318	0.922104	0.000402242	4.24087	6.30496	9	AGPAT3	0.0906265	A	G	0.084537
319	-0.230972	0.549887	-0.622323	0.628077	9	AGPAT4	0.879946	B	G	0.0491105
320	0.0215212	0.956174	0.0569485	0.0569529	9	AGPAT5	0.990505	B	G	-0.107424
321	0.671879	0.0474627	2.15406	2.40005	9	AGPS	0.514607	B	G	0.0287291
322	0.728878	0.0258959	2.45084	2.81669	9	AGR2	0.424279	X	G	0.387654
323	0.458355	0.214663	1.31025	1.36446	9	AGR3	0.74534	C	G	-0.10755
324	0.556105	0.119984	1.65935	1.7703	9	AGRN	0.676578	A	G	-0.173703
325	0.334577	0.378828	0.920651	0.939344	9	AGRP	0.837018	E	G	-0.180337
326	0.356251	0.346692	0.985768	1.00873	9	AGT	0.820859	B	G	0.0581662
327	-0.119456	0.759522	-0.317567	0.31833	9	AGTPBP1	0.941064	E	G	0.0956706
328	-0.392534	0.296028	-1.09744	1.12918	9	AGTR1	0.79626	X	G	-0.231942
329	-0.033537	0.931743	-0.0887638	0.0887805	9	AGTR2	0.986016	X	G	-0.0946015
330	0.161628	0.677817	0.431412	0.433326	9	AGTRAP	0.918449	F	G	-0.017989
331	-0.173423	0.655441	-0.463519	0.465894	9	AGXT	0.913162	X	G	-0.0643373
332	0.746059	0.0209759	2.55052	2.96432	9	AHCTF1	0.391711	D	G	0.143691
333	0.157279	0.686126	0.419603	0.421365	9	AHCY	0.920648	A	G	0.465757
334	0.0462655	0.905917	0.122494	0.122538	9	AHCYL1	0.980273	D	G	-0.265979
335	0.367509	0.330545	1.02004	1.0455	9	AHCYL2	0.812101	A	G	-0.222536
336	0.0338829	0.93104	0.0896801	0.0896973	9	AHDC1	0.986016	D	G	0.0963977
337	0.656094	0.0549805	2.07936	2.30013	9	AHI1	0.533475	A	G	0.10052
338	0.466575	0.205487	1.33791	1.39567	9	AHNAK	0.740001	X	G	-0.0261953
339	0.842434	0.00436701	3.25295	4.13673	9	AHNAK2	0.216868	F	G	-0.0820824
340	0.00618535	0.9874	0.0163651	0.0163652	9	AHR	0.997218	A	G	0.00922375
341	0.604725	0.0845035	1.85352	2.00889	9	AHRR	0.615099	X	G	0.190195
342	-0.41607	0.265341	-1.17188	1.21058	9	AHSA1	0.781754	X	G	-0.162382
343	-0.280064	0.465447	-0.761319	0.771869	9	AHSA2P	0.870586	X	G	-0.104345
344	-0.418896	0.261775	-1.18094	1.22054	9	AHSG	0.779031	I	G	-0.339755
345	0.220581	0.56846	0.593353	0.59834	9	AICDA	0.882394	F	G	0.0657344
346	0.208268	0.590758	0.559206	0.563379	9	AIDA	0.892044	B	G	0.395505
347	-0.0913797	0.815133	-0.242444	0.242784	9	AIF1L	0.956376	B	G	-0.272637
348	-0.153108	0.694119	-0.408297	0.40992	9	AIFM1	0.923996	D	G	-0.0502042
349	0.616385	0.0771026	1.9027	2.071	9	AIFM2	0.596066	X	G	-0.0257126
350	0.0405538	0.917498	0.107354	0.107384	9	AIFM3	0.98244	F	G	-0.186692
351	0.108975	0.780183	0.289471	0.290049	9	AIG1	0.9469	A	G	0.038906
352	0.01187	0.975821	0.0314067	0.0314074	9	AIMP1	0.993652	H	G	-0.0352289
353	-0.380785	0.311995	-1.06089	1.08954	9	AIMP2	0.805518	A	G	0.0577228
354	-0.316693	0.406356	-0.867719	0.883358	9	AIP	0.851794	D	G	0.0295193
355	-0.612691	0.0794015	-1.887	2.0511	9	AJAP1	0.602178	F	G	-0.222792
356	-0.182629	0.638137	-0.488674	0.491457	9	AK1	0.90705	D	G	-0.148495
357	0.450637	0.22348	1.28451	1.33557	9	AK2	0.753902	X	G	0.0034426
358	-0.133941	0.731185	-0.356516	0.357596	9	AK3	0.933689	E	G	-0.0166927
359	0.547167	0.127335	1.62536	1.72954	9	AK4	0.690086	B	G	0.363716
360	-0.125807	0.747064	-0.334628	0.335521	9	AK5	0.937984	A	G	-0.191899
361	-0.228297	0.554646	-0.614852	0.620401	9	AK6	0.879946	E	G	0.0964903
362	0.18027	0.642557	0.48222	0.484894	9	AK7	0.908358	C	G	-0.112761
363	-0.36153	0.339073	-1.0018	1.02591	9	AK8	0.817001	B	G	0.151423
364	0.0387967	0.921063	0.102698	0.102724	9	AK9	0.982869	A	G	-0.140446
365	-0.288158	0.452087	-0.784613	0.796164	9	AKAIN1	0.86964	C	G	0.122237
366	-0.592188	0.0929332	-1.80184	1.94438	9	AKAP1	0.631908	B	G	-0.240612
367	-0.0996523	0.798662	-0.264533	0.264974	9	AKAP10	0.950319	B	G	-0.169584
368	0.113302	0.771638	0.301062	0.301712	9	AKAP11	0.945197	A	G	-0.231102
369	0.144423	0.71085	0.384798	0.386156	9	AKAP12	0.927794	F	G	-0.165445
370	0.87658	0.0019235	3.60035	4.81908	9	AKAP13	0.162743	A	G	-0.218634
371	0.574765	0.105474	1.73193	1.8583	9	AKAP14	0.653169	E	G	-0.0264453
372	0.272518	0.478052	0.739703	0.749377	9	AKAP17A	0.870586	A	G	-0.138028
373	-0.319842	0.401443	-0.876991	0.893139	9	AKAP5	0.850494	C	G	-0.0457582
374	0.393577	0.294632	1.1007	1.13273	9	AKAP6	0.795578	F	G	0.107851
375	-0.00425997	0.991322	-0.0112709	0.0112709	9	AKAP7	0.997941	C	G	-0.0601078
376	-0.0640076	0.870049	-0.16958	0.169696	9	AKAP8L	0.970382	X	G	0.223509
377	0.517631	0.153487	1.51628	1.60065	9	AKAP9	0.699613	A	G	-0.142764
378	-0.305196	0.42452	-0.834044	0.847926	9	AKIP1	0.860036	K	G	0.0288058
379	-0.06537	0.867303	-0.1732	0.173323	9	AKIRIN2	0.970038	D	G	0.144554
380	0.619316	0.0753079	1.91524	2.08695	9	AKNA	0.592876	X	G	0.0311357
381	0.237768	0.537866	0.641349	0.647648	9	AKNAD1	0.876415	X	G	0.154777
382	0.0134922	0.972518	0.0356992	0.0357003	9	AKR1A1	0.993103	B	G	0.266905
383	-0.466353	0.205732	-1.33716	1.39482	9	AKR1D1	0.740167	B	G	-0.0140538
384	0.248614	0.518895	0.671848	0.679092	9	AKR7A2	0.871191	E	G	0.191297
385	-0.106216	0.785642	-0.282086	0.282621	9	AKT1	0.947732	B	G	0.142915
386	0.729567	0.0256853	2.45473	2.82238	9	AKT3	0.422858	A	G	0.308116
387	-0.339516	0.371385	-0.935393	0.955001	9	AKTIP	0.834774	A	G	0.0298224
388	-0.851512	0.0035813	-3.33795	4.29665	9	ALAD	0.2046	B	G	-0.111968
389	-0.264182	0.492139	-0.715938	0.724707	9	ALAS1	0.870586	D	G	0.0580581
390	-0.00587926	0.988023	-0.0155552	0.0155553	9	ALB	0.997396	X	G	-0.0974972
391	0.366625	0.331799	1.01734	1.0426	9	ALCAM	0.812739	A	G	-0.0786973
392	0.735397	0.0239484	2.48801	2.87127	9	ALDH18A1	0.41428	C	G	0.102455
393	-0.215935	0.576837	-0.580447	0.585115	9	ALDH1A1	0.885585	X	G	0.283478
394	0.908432	0.000698765	4.01751	5.74951	9	ALDH1A2	0.111774	F	G	-0.0026713
395	0.673187	0.0468709	2.16039	2.40859	9	ALDH1A3	0.513538	X	G	0.0130476
396	0.636718	0.0651892	1.99128	2.18468	9	ALDH1L2	0.566366	A	G	0.249536
397	0.402166	0.283258	1.1277	1.16216	9	ALDH2	0.792685	C	G	-0.0181831
398	0.0305484	0.937816	0.0808487	0.0808613	9	ALDH3A2	0.987149	X	G	-0.158088
399	0.541079	0.132491	1.60248	1.70227	9	ALDH4A1	0.692362	B	G	0.123024
400	-0.166669	0.668226	-0.445118	0.44722	9	ALDH5A1	0.916692	B	G	-0.133517
401	-0.11657	0.765198	-0.309825	0.310533	9	ALDH6A1	0.943131	B	G	-0.0237259
402	0.576862	0.103913	1.74023	1.86846	9	ALDH7A1	0.65005	X	G	0.191386
403	-0.348421	0.358143	-0.962116	0.983461	9	ALDH8A1	0.829114	A	G	-0.176659
404	0.427748	0.250767	1.20947	1.25204	9	ALDH9A1	0.773342	C	G	0.196046
405	0.429783	0.248274	1.21607	1.25934	9	ALDOB	0.771842	A	G	0.284219
406	-0.62592	0.0713602	-1.94378	2.12342	9	ALDOC	0.582772	A	G	0.0182386
407	-0.0538795	0.890503	-0.14269	0.142759	9	ALG1	0.97594	X	G	0.179081
408	-0.345343	0.362694	-0.952859	0.973591	9	ALG11	0.830252	A	G	-0.255449
409	-0.0311111	0.936672	-0.0823387	0.082352	9	ALG12	0.986665	B	G	0.267099
410	0.268513	0.484799	0.728271	0.737502	9	ALG14	0.870586	E	G	-0.0860124
411	-0.234661	0.543349	-0.632643	0.638689	9	ALG2	0.877573	X	G	-0.0420407
412	-0.0364305	0.925866	-0.0964288	0.0964501	9	ALG3	0.984161	D	G	-0.0440964
413	0.742765	0.0218666	2.53097	2.93505	9	ALG5	0.398568	B	G	0.392141
414	0.553923	0.121754	1.65101	1.76027	9	ALG6	0.680822	C	G	0.14558
415	-0.216914	0.575069	-0.583163	0.587897	9	ALG8	0.88494	B	G	0.2108
416	-0.378899	0.314597	-1.05506	1.08324	9	ALG9	0.806039	A	G	-0.0382967
417	-0.283608	0.459577	-0.771503	0.782484	9	ALK	0.870586	X	G	-0.250516
418	0.554664	0.121152	1.65384	1.76367	9	ALKAL1	0.679346	A	G	-0.0622717
419	0.77778	0.0135996	2.75086	3.27397	9	ALKAL2	0.33937	A	G	-0.0059506
420	-0.143567	0.712505	-0.382485	0.383818	9	ALKBH1	0.927794	A	G	0.131294
421	-0.380544	0.312327	-1.06014	1.08874	9	ALKBH2	0.805518	X	G	0.0782996
422	0.393542	0.294678	1.10059	1.13261	9	ALKBH3	0.795578	L	G	0.00901958
423	-0.129952	0.738961	-0.345776	0.346761	9	ALKBH4	0.93534	A	G	0.303196
424	-0.166829	0.667924	-0.445552	0.447661	9	ALKBH5	0.916692	A	G	-0.376612
425	-0.541766	0.131903	-1.60505	1.70533	9	ALKBH7	0.692328	D	G	-0.120989
426	0.144111	0.711453	0.383955	0.385304	9	ALKBH8	0.927794	A	G	-0.0181378
427	-0.141365	0.716767	-0.376538	0.37781	9	ALMS1	0.929306	A	G	-0.128026
428	0.441894	0.233703	1.25562	1.30329	9	ALOX5	0.761004	C	G	-0.108644
429	0.655331	0.0553617	2.07582	2.29544	9	ALOX5AP	0.533965	C	G	0.291372
430	-0.101255	0.79548	-0.268816	0.269279	9	ALPK1	0.949123	F	G	0.106035
431	-0.475015	0.196297	-1.3666	1.42819	9	ALPK3	0.730676	X	G	0.0945413
432	0.0229617	0.953243	0.0607615	0.0607668	9	ALPL	0.989258	X	G	-0.233861
433	0.614848	0.0780538	1.89616	2.0627	9	ALS2	0.59898	F	G	0.269128
434	-0.437991	0.238347	-1.24282	1.28903	9	ALS2CL	0.764576	X	G	0.0250515
435	0.24849	0.519109	0.6715	0.678732	9	ALX1	0.871191	X	G	-0.00357215
436	0.736496	0.0236301	2.49435	2.88064	9	ALX3	0.413393	X	G	0.064826
437	0.627625	0.0703625	1.95121	2.13296	9	ALX4	0.577579	X	G	0.36499
438	0.0574264	0.883333	0.152103	0.152187	9	ALYREF	0.974207	D	G	0.123473
439	0.0674496	0.863113	0.178726	0.178862	9	AMACR	0.9686	E	G	0.0654383
440	-0.250559	0.51552	-0.677338	0.684761	9	AMBP	0.870586	A	G	-0.049927
441	-0.413991	0.267981	-1.16524	1.20327	9	AMBRA1	0.782747	A	G	-0.175447
442	-0.0673975	0.863218	-0.178588	0.178723	9	AMD1	0.9686	B	G	0.0862115
443	0.0765062	0.844901	0.202813	0.203011	9	AMDHD1	0.963459	X	G	-0.189264
444	0.0592994	0.87955	0.157076	0.157168	9	AMDHD2	0.972846	A	G	0.177344
445	0.30475	0.425231	0.832744	0.846562	9	AMER1	0.860036	A	G	-0.294071
446	0.110428	0.777312	0.293361	0.293962	9	AMER2	0.946578	A	G	-0.00137503
447	0.243826	0.527238	0.658362	0.665177	9	AMER3	0.873825	C	G	-0.061767
448	-0.369313	0.327992	-1.02557	1.05144	9	AMFR	0.809896	A	G	-0.249115
449	-0.365998	0.33269	-1.01542	1.04054	9	AMH	0.813703	A	G	-0.268269
450	0.446379	0.228427	1.27041	1.31979	9	AMHR2	0.758559	A	G	-0.253406
451	0.243716	0.527429	0.658054	0.66486	9	AMIGO1	0.873825	D	G	0.0266371
452	-0.722031	0.0280506	-2.41259	2.76112	9	AMIGO2	0.436152	A	G	-0.292983
453	-0.066537	0.864951	-0.176301	0.176431	9	AMIGO3	0.969054	A	G	-0.174817
454	0.132827	0.733354	0.353516	0.354569	9	AMMECR1	0.934351	F	G	-0.102768
455	0.0629688	0.872144	0.166821	0.166931	9	AMMECR1L	0.970382	X	G	0.00510473
456	0.237625	0.538119	0.640947	0.647235	9	AMN	0.876415	X	G	0.0593909
457	0.161622	0.677831	0.431393	0.433307	9	AMN1	0.918449	E	G	0.148445
458	0.777509	0.0136539	2.74904	3.27108	9	AMOT	0.33937	B	G	0.179788
459	-0.575784	0.104714	-1.73596	1.86323	9	AMOTL1	0.651277	B	G	0.0599504
460	0.43227	0.245242	1.22415	1.2683	9	AMOTL2	0.770902	X	G	0.209612
461	-0.0778486	0.842207	-0.206386	0.206595	9	AMPD1	0.962556	X	G	0.0555957
462	-0.240597	0.532892	-0.649288	0.655825	9	AMPD2	0.875219	B	G	0.0178279
463	0.0558443	0.88653	0.147904	0.147981	9	AMPD3	0.974976	F	G	-0.0965993
464	0.330438	0.385119	0.908339	0.926288	9	AMPH	0.841679	B	G	0.261144
465	0.51055	0.160185	1.49081	1.57096	9	AMT	0.699613	A	G	0.0543169
466	-0.145451	0.708863	-0.387577	0.388965	9	AMZ1	0.927794	C	G	-0.0759347
467	0.364931	0.334208	1.01217	1.03704	9	ANAPC1	0.815034	A	G	-0.0741598
468	0.0537555	0.890754	0.142361	0.14243	9	ANAPC10	0.97594	A	G	0.141371
469	-0.126916	0.744893	-0.33761	0.338527	9	ANAPC11	0.93707	D	G	0.0850861
470	0.0810454	0.835797	0.214897	0.215134	9	ANAPC13	0.960836	A	G	-0.113855
471	-0.226195	0.558397	-0.608986	0.614378	9	ANAPC15	0.880099	B	G	0.112442
472	0.0496599	0.899041	0.131496	0.13155	9	ANAPC16	0.978749	E	G	0.307024
473	0.162991	0.675222	0.435113	0.437077	9	ANAPC2	0.918449	A	G	0.210333
474	0.155858	0.688846	0.41575	0.417463	9	ANAPC4	0.922395	D	G	0.0780471
475	-0.228848	0.553665	-0.61639	0.621981	9	ANAPC5	0.879946	B	G	-0.0558628
476	0.415699	0.265811	1.1707	1.20927	9	ANAPC7	0.781754	D	G	0.225671
477	-0.0489237	0.900532	-0.129543	0.129595	9	ANGEL1	0.979096	A	G	-0.13343
478	-0.310113	0.416707	-0.848414	0.863029	9	ANGEL2	0.857267	B	G	-0.123925
479	0.736081	0.0237498	2.49196	2.8771	9	ANGPT1	0.413427	C	G	-0.16543
480	0.460242	0.212537	1.31657	1.37159	9	ANGPT2	0.744549	F	G	-0.0980586
481	0.539509	0.133841	1.59661	1.6953	9	ANGPT4	0.694086	X	G	0.0288831
482	0.417379	0.263687	1.17607	1.21519	9	ANGPTL1	0.780559	X	G	0.0820057
483	0.700805	0.0354659	2.29884	2.59921	9	ANGPTL2	0.469858	X	G	0.000474755
484	-0.00181697	0.996299	-0.00480725	0.00480725	9	ANGPTL3	0.999544	A	G	-0.283983
485	0.168597	0.66457	0.450365	0.452543	9	ANGPTL4	0.916153	C	G	-0.0106565
486	0.365724	0.333079	1.01459	1.03964	9	ANGPTL5	0.814302	A	G	0.00152679
487	0.0351509	0.928465	0.0930388	0.0930579	9	ANGPTL7	0.985137	C	G	-0.113452
488	-0.171283	0.659483	-0.457685	0.459971	9	ANHX	0.914519	B	G	0.193164
489	0.248951	0.518309	0.672799	0.680074	9	ANK1	0.871191	B	G	-0.166834
490	0.587374	0.0963018	1.7823	1.9202	9	ANK2	0.636258	C	G	0.0644426
491	0.341703	0.368112	0.941938	0.961963	9	ANK3	0.833207	A	G	-0.338128
492	-0.662657	0.0517689	-2.11008	2.341	9	ANKDD1A	0.526599	A	G	-0.154315
493	0.326444	0.391235	0.896495	0.913749	9	ANKDD1B	0.846283	E	G	0.220191
494	-0.185145	0.633434	-0.495563	0.498465	9	ANKEF1	0.90606	A	G	0.160592
495	-0.738832	0.0229622	-2.50792	2.90072	9	ANKFN1	0.408915	A	G	-0.211095
496	0.631131	0.0683383	1.96657	2.15272	9	ANKFY1	0.572835	B	G	0.280712
497	-0.341386	0.368586	-0.940988	0.960953	9	ANKH	0.833551	A	G	-0.257568
498	0.474	0.19739	1.36314	1.42425	9	ANKHD1	0.731185	H	G	0.121932
499	0.657296	0.0543831	2.08495	2.30755	9	ANKIB1	0.531931	A	G	-0.156815
500	-0.25	0.51649	-0.675759	0.68313	9	ANKK1	0.870586	A	G	-0.183335
501	0.71131	0.0316542	2.35427	2.67749	9	ANKLE2	0.456879	C	G	-0.100175
502	-0.239269	0.535225	-0.645559	0.651984	9	ANKMY2	0.876128	B	G	-0.0775107
503	-0.23782	0.537775	-0.641494	0.647798	9	ANKRA2	0.876415	E	G	0.214221
504	0.406443	0.277682	1.14123	1.17695	9	ANKRD1	0.788977	X	G	-0.107163
505	0.391967	0.296789	1.09566	1.12725	9	ANKRD10	0.797217	A	G	-0.100919
506	0.457019	0.216175	1.30578	1.35943	9	ANKRD11	0.745388	B	G	0.173533
507	-0.347796	0.359065	-0.960235	0.981455	9	ANKRD12	0.829114	X	G	0.00977067
508	0.00173294	0.99647	0.00458492	0.00458492	9	ANKRD13A	0.999553	A	G	-0.321616
509	0.134579	0.729942	0.358236	0.359332	9	ANKRD13B	0.933689	A	G	0.173558
510	-0.352207	0.352583	-0.973535	0.995653	9	ANKRD13C	0.825017	D	G	-0.0894806
511	-0.359173	0.342465	-0.994633	1.01823	9	ANKRD13D	0.818258	D	G	-0.131661
512	-0.0965172	0.804897	-0.256158	0.256558	9	ANKRD16	0.953304	J	G	-0.127451
513	0.516928	0.154145	1.51374	1.59768	9	ANKRD17	0.699613	A	G	-0.346068
514	0.0226141	0.953951	0.0598415	0.0598466	9	ANKRD2	0.989633	X	G	-0.0491571
515	-0.0462083	0.906033	-0.122343	0.122386	9	ANKRD22	0.980346	X	G	-0.306442
516	0.289492	0.449902	0.788464	0.800186	9	ANKRD24	0.869243	B	G	-0.0371616
517	0.0242243	0.950675	0.0641041	0.0641104	9	ANKRD26	0.989145	A	G	-0.141787
518	-0.106247	0.78558	-0.282169	0.282704	9	ANKRD27	0.947732	F	G	-0.178772
519	0.333996	0.379709	0.918919	0.937506	9	ANKRD28	0.837812	A	G	-0.208552
520	0.151927	0.696387	0.405099	0.406683	9	ANKRD29	0.924775	C	G	0.265369
521	0.17782	0.647158	0.475522	0.478086	9	ANKRD31	0.909532	E	G	0.412124
522	0.228035	0.555113	0.61412	0.619649	9	ANKRD33	0.879946	X	G	0.0418225
523	-0.652347	0.0568693	-2.06203	2.27721	9	ANKRD33B	0.540346	B	G	-0.0580982
524	-0.292591	0.444841	-0.797423	0.809551	9	ANKRD34A	0.867699	D	G	0.161557
525	0.364554	0.334746	1.01102	1.0358	9	ANKRD34B	0.815034	E	G	-0.0349965
526	-0.812395	0.00779656	-3.00037	3.68611	9	ANKRD34C	0.270888	D	G	0.0824765
527	-0.318829	0.403021	-0.874005	0.889989	9	ANKRD35	0.850494	B	G	-0.10319
528	-0.212249	0.583516	-0.570225	0.57465	9	ANKRD37	0.889919	A	G	-0.157113
529	-0.278886	0.467406	-0.757938	0.768347	9	ANKRD39	0.870586	X	G	0.245297
530	0.315993	0.407452	0.86566	0.881188	9	ANKRD40	0.852753	A	G	-0.23596
531	0.297299	0.437201	0.811066	0.82383	9	ANKRD42	0.864525	X	G	0.0950691
532	-0.671013	0.0478568	-2.14989	2.39442	9	ANKRD44	0.514607	B	G	0.265837
533	0.195894	0.613471	0.525073	0.528526	9	ANKRD46	0.899528	B	G	0.18532
534	-0.743467	0.0216747	-2.53512	2.94125	9	ANKRD49	0.398049	B	G	0.137135
535	0.0556277	0.886968	0.147329	0.147405	9	ANKRD50	0.975055	A	G	-0.0498795
536	0.282505	0.4614	0.768332	0.779177	9	ANKRD52	0.870586	D	G	0.140645
537	0.137729	0.723819	0.366726	0.367902	9	ANKRD54	0.93202	B	G	-0.0264806
538	0.306796	0.42197	0.838716	0.852834	9	ANKRD55	0.85979	E	G	0.4049
539	0.0258799	0.947307	0.068487	0.0684947	9	ANKRD6	0.989026	B	G	0.00490124
540	0.22493	0.560659	0.605461	0.610759	9	ANKRD66	0.880524	C	G	0.165459
541	0.443241	0.232111	1.26006	1.30824	9	ANKRD9	0.761004	B	G	0.0315487
542	0.901069	0.000909224	3.91009	5.49721	9	ANKS1A	0.124026	A	G	0.174154
543	0.206398	0.594171	0.554038	0.558096	9	ANKS1B	0.893295	B	G	0.234965
544	-0.15141	0.697383	-0.403696	0.405264	9	ANKS3	0.925352	D	G	-0.0959984
545	0.0281831	0.942624	0.0745853	0.0745952	9	ANKS4B	0.987996	F	G	0.160614
546	0.0915727	0.814748	0.242959	0.243301	9	ANKS6	0.956376	X	G	-0.0446961
547	-0.255305	0.507326	-0.690751	0.698625	9	ANKZF1	0.870586	D	G	-0.0965362
548	-0.0957707	0.806383	-0.254164	0.254555	9	ANLN	0.953958	I	G	-0.342493
549	-0.0422395	0.914078	-0.111822	0.111855	9	ANO1	0.982076	C	G	-0.226015
550	0.588563	0.0954629	1.78711	1.92614	9	ANO10	0.634772	B	G	0.401941
551	-0.0924307	0.813037	-0.245249	0.2456	9	ANO3	0.955896	A	G	-0.277984
552	0.41718	0.263937	1.17544	1.21449	9	ANO4	0.780559	A	G	-0.227747
553	0.706725	0.033283	2.32988	2.6429	9	ANO5	0.462127	A	G	0.574346
554	0.689838	0.0397504	2.24266	2.52103	9	ANO6	0.486025	E	G	0.22031
555	-0.2688	0.484314	-0.729089	0.738352	9	ANO8	0.870586	D	G	-0.16445
556	-0.187066	0.62985	-0.500829	0.503825	9	ANO9	0.904516	X	G	0.117053
557	-0.0462966	0.905854	-0.122577	0.122621	9	ANOS1	0.980273	C	G	-0.135271
558	0.3825	0.309638	1.0662	1.09529	9	ANP32A	0.805144	A	G	-0.137269
559	-0.100733	0.796515	-0.267423	0.267878	9	ANP32E	0.949545	B	G	0.04018
560	0.584483	0.0983599	1.77066	1.90582	9	ANPEP	0.642447	X	G	0.0365221
561	0.159248	0.68236	0.424949	0.426778	9	ANTKMT	0.9192	X	G	0.045677
562	0.717276	0.0296136	2.3865	2.72354	9	ANTXR1	0.447135	X	G	0.28727
563	0.370655	0.326101	1.02968	1.05587	9	ANTXR2	0.809079	B	G	0.391649
564	0.824832	0.00621227	3.10016	3.8599	9	ANTXRL	0.250641	C	G	-0.0146042
565	0.376638	0.317732	1.04808	1.0757	9	ANXA1	0.806129	X	G	0.239777
566	-0.00486256	0.990094	-0.0128652	0.0128653	9	ANXA10	0.99774	F	G	0.0544506
567	0.28781	0.452658	0.78361	0.795117	9	ANXA11	0.86964	A	G	-0.174616
568	0.415864	0.265602	1.17122	1.20985	9	ANXA13	0.781754	X	G	0.0857577
569	0.912666	0.000594591	4.08307	5.90812	9	ANXA2	0.105343	C	G	0.181952
570	0.00640286	0.986957	0.0169406	0.0169407	9	ANXA4	0.99705	A	G	0.138755
571	0.908294	0.00070235	4.01543	5.74453	9	ANXA5	0.111774	X	G	-0.153191
572	0.347017	0.360216	0.957889	0.978953	9	ANXA6	0.829569	D	G	-0.0643486
573	-0.0997341	0.7985	-0.264752	0.265194	9	ANXA7	0.950295	A	G	0.103991
574	-0.43471	0.242289	-1.2321	1.27712	9	AOAH	0.767758	X	G	0.0356963
575	-0.51632	0.154715	-1.51154	1.59512	9	AOC1	0.699613	D	G	-0.0675668
576	-0.268965	0.484035	-0.729561	0.738842	9	AOPEP	0.870586	E	G	0.0312595
577	0.212323	0.583381	0.570432	0.574861	9	AOX1	0.889781	X	G	-0.0269103
578	-0.25511	0.507662	-0.690198	0.698053	9	AP1AR	0.870586	B	G	-0.0395792
579	-0.181227	0.640764	-0.484835	0.487554	9	AP1B1	0.907758	D	G	0.0318295
580	0.310105	0.41672	0.848391	0.863005	9	AP1G1	0.857267	B	G	0.097605
581	-0.318688	0.403241	-0.873591	0.889551	9	AP1M1	0.850494	B	G	0.0931621
582	-0.085465	0.826948	-0.226672	0.22695	9	AP1M2	0.96014	A	G	-0.170423
583	-0.183274	0.636931	-0.490438	0.493251	9	AP1S1	0.906601	X	G	-0.118675
584	0.270137	0.482057	0.732905	0.742314	9	AP1S2	0.870586	I	G	-0.364969
585	0.472021	0.199531	1.35639	1.41659	9	AP1S3	0.733232	C	G	-0.102672
586	0.298767	0.434832	0.815328	0.828294	9	AP2A2	0.862541	A	G	0.525704
587	0.603418	0.0853596	1.84807	2.00206	9	AP2B1	0.615916	A	G	0.56128
588	-0.199094	0.607569	-0.533883	0.537513	9	AP2S1	0.89755	A	G	0.276799
589	0.757071	0.0181731	2.61749	3.06586	9	AP3B1	0.37373	E	G	0.0569214
590	0.242201	0.53008	0.653794	0.660468	9	AP3B2	0.874231	B	G	0.256278
591	-0.166163	0.669188	-0.44374	0.445823	9	AP3D1	0.916692	A	G	0.0296076
592	0.283846	0.459183	0.77219	0.7832	9	AP3M1	0.870586	X	G	0.20461
593	-0.328216	0.388517	-0.901744	0.919304	9	AP3M2	0.844556	A	G	-0.0350612
594	0.0110285	0.977535	0.0291798	0.0291804	9	AP3S1	0.994307	A	G	0.323585
595	-0.410628	0.272281	-1.15452	1.19151	9	AP3S2	0.785596	D	G	-0.0362045
596	0.0527681	0.892751	0.139741	0.139806	9	AP4B1	0.9763	X	G	-0.128918
597	0.593915	0.0917431	1.80888	1.95313	9	AP4E1	0.628653	A	G	0.255525
598	0.13251	0.733971	0.352663	0.353708	9	AP4S1	0.934351	X	G	0.0127944
599	0.300788	0.431578	0.821204	0.834454	9	AP5M1	0.862114	X	G	0.157215
600	-0.326513	0.391129	-0.896699	0.913965	9	AP5S1	0.846237	A	G	0.0541639
601	-0.315064	0.408907	-0.862933	0.878314	9	AP5Z1	0.853571	B	G	0.329018
602	0.711045	0.0317469	2.35285	2.67547	9	APAF1	0.456992	A	G	0.0729332
603	0.109638	0.778873	0.291245	0.291834	9	APBA1	0.946698	B	G	0.156549
604	0.727777	0.0262347	2.44463	2.80764	9	APBA2	0.426649	A	G	0.296195
605	0.267739	0.486108	0.726064	0.735212	9	APBA3	0.870586	X	G	0.147995
606	-0.288356	0.451762	-0.785185	0.796762	9	APBB1	0.86964	B	G	-0.0627596
607	0.423289	0.256281	1.19507	1.23612	9	APBB1IP	0.777117	A	G	-0.121228
608	-0.12824	0.742305	-0.34117	0.342116	9	APBB2	0.936322	B	G	0.201667
609	0.191828	0.620997	0.513896	0.517134	9	APBB3	0.901547	A	G	0.408165
610	0.29269	0.44468	0.797708	0.809849	9	APC	0.867648	D	G	-0.103788
611	-0.258108	0.502509	-0.698692	0.706841	9	APC2	0.870586	B	G	-0.1014
612	0.440219	0.23569	1.25012	1.29716	9	APCDD1	0.762389	C	G	-0.110155
613	0.928416	0.000301141	4.357	6.61126	9	APCDD1L	0.0845775	X	G	0.247912
614	0.125365	0.74793	0.333439	0.334322	9	APELA	0.938185	F	G	-0.0778662
615	-0.0461209	0.90621	-0.122111	0.122155	9	APH1A	0.980431	D	G	0.119082
616	-0.223218	0.563724	-0.600693	0.605867	9	API5	0.880524	B	G	0.0920443
617	-0.517889	0.153247	-1.51721	1.60174	9	APIP	0.699613	A	G	0.0302766
618	0.180107	0.642863	0.481774	0.484441	9	APLF	0.90846	H	G	0.113937
619	-0.358583	0.343316	-0.992841	1.01631	9	APLN	0.81894	X	G	-0.134548
620	0.0834494	0.830982	0.221301	0.221559	9	APLNR	0.960674	X	G	-0.0114724
621	0.116852	0.764642	0.310581	0.311295	9	APLP2	0.942891	A	G	0.0865359
622	0.567489	0.110998	1.70336	1.8235	9	APMAP	0.662675	B	G	0.112843
623	0.363352	0.336463	1.00735	1.03187	9	APOA1	0.815415	C	G	-0.056216
624	-0.119923	0.758604	-0.318821	0.319593	9	APOA4	0.941064	X	G	-0.0836587
625	0.629999	0.0689881	1.9616	2.14631	9	APOB	0.574056	C	G	0.241802
626	0.0936692	0.810568	0.248554	0.24892	9	APOBEC2	0.955722	L	G	-0.0603063
627	0.890491	0.00128363	3.76833	5.17806	9	APOC3	0.14058	X	G	-0.0528408
628	0.331814	0.383022	0.912428	0.930622	9	APOD	0.840429	A	G	-0.293728
629	0.885361	0.00149891	3.70417	5.03856	9	APOF	0.146465	C	G	0.0652943
630	0.0775147	0.842877	0.205497	0.205704	9	APOH	0.962705	I	G	-0.410815
631	0.186911	0.630139	0.500404	0.503393	9	APOLD1	0.904552	A	G	-0.133071
632	-0.236891	0.539412	-0.638889	0.645116	9	APOO	0.876987	B	G	-0.38442
633	0.460859	0.211845	1.31865	1.37392	9	APOOL	0.743802	A	G	-0.239927
634	0.304589	0.425488	0.832274	0.846069	9	APP	0.860077	A	G	0.152332
635	0.0156573	0.96811	0.0414288	0.0414305	9	APPBP2	0.992267	B	G	-0.0668169
636	0.0316513	0.935574	0.0837693	0.0837833	9	APPL1	0.986234	D	G	-0.122845
637	0.438118	0.238194	1.24324	1.2895	9	APPL2	0.764325	C	G	0.0281869
638	-0.152832	0.694649	-0.407549	0.409163	9	APRT	0.924294	A	G	0.103362
639	0.21388	0.580556	0.574747	0.579279	9	APTX	0.888192	E	G	0.267373
640	-0.671685	0.0475507	-2.15313	2.39879	9	AQP1	0.514607	B	G	-0.00694215
641	0.0805592	0.836771	0.213602	0.213835	9	AQP10	0.960836	X	G	-0.0192319
642	0.396554	0.290664	1.11003	1.14289	9	AQP11	0.795522	A	G	0.343195
643	NA	NA	NA	NA	9	AQP2	NA	X	G	-0.0575728
644	-0.434922	0.242032	-1.23279	1.27789	9	AQP3	0.767625	A	G	-0.206797
645	0.834359	0.00515863	3.18102	4.00475	9	AQP4	0.232451	X	G	0.103146
646	-0.25	0.51649	-0.675759	0.68313	9	AQP5	0.870586	X	G	0.0135579
647	-0.25	0.51649	-0.675759	0.68313	9	AQP8	0.870586	X	G	-0.0859848
648	0.895352	0.00110044	3.83178	5.31902	9	AQP9	0.131346	F	G	-0.0360129
649	0.323837	0.395252	0.888781	0.905592	9	AQR	0.848327	A	G	-0.319334
650	0.802193	0.00928474	2.92285	3.55473	9	AR	0.29039	G	G	0.666925
651	0.395716	0.291777	1.1074	1.14002	9	ARAP1	0.795522	X	G	0.0191128
652	0.231562	0.548839	0.623973	0.629773	9	ARAP2	0.879767	X	G	0.185245
653	0.121216	0.756064	0.322293	0.32309	9	ARAP3	0.940775	D	G	-0.0468813
654	-0.385513	0.305518	-1.07555	1.10542	9	ARC	0.801413	X	G	-0.162909
655	-0.292151	0.445559	-0.796148	0.808218	9	ARCN1	0.867821	B	G	-0.0762948
656	-0.115016	0.768259	-0.305656	0.306336	9	AREG	0.944036	A	G	-0.19213
657	-0.651477	0.0573138	-2.05802	2.27193	9	AREL1	0.541509	A	G	-0.309373
658	-0.0810513	0.835785	-0.214913	0.215149	9	ARF1	0.960836	B	G	0.110804
659	-0.638622	0.064137	-1.99977	2.1957	9	ARF3	0.562341	D	G	0.0174933
660	-0.104238	0.789561	-0.276793	0.277299	9	ARF4	0.948296	A	G	0.418315
661	-0.172152	0.657841	-0.460052	0.462374	9	ARF6	0.913708	D	G	-0.0167284
662	-0.38258	0.309527	-1.06645	1.09556	9	ARFGAP1	0.805144	B	G	0.0556551
663	-0.579739	0.101795	-1.75167	1.88247	9	ARFGAP2	0.645335	B	G	-0.123495
664	-0.143339	0.712946	-0.381869	0.383197	9	ARFGAP3	0.927794	A	G	-0.0940889
665	0.336061	0.376584	0.925075	0.944039	9	ARFGEF1	0.83652	F	G	-0.00763554
666	0.0256326	0.94781	0.0678322	0.0678397	9	ARFGEF2	0.989112	A	G	-0.235014
667	0.321499	0.39887	0.881877	0.898297	9	ARFGEF3	0.850334	F	G	0.165853
668	0.613585	0.0788417	1.89079	2.05589	9	ARFIP1	0.601344	A	G	0.0597525
669	-0.47521	0.196088	-1.36727	1.42894	9	ARFIP2	0.730634	D	G	-0.0298951
670	-0.236861	0.539465	-0.638805	0.64503	9	ARFRP1	0.876987	B	G	0.0100712
671	-0.237331	0.538635	-0.640124	0.646388	9	ARG2	0.876415	C	G	0.0810042
672	0.250097	0.516322	0.676031	0.683412	9	ARGLU1	0.870586	A	G	0.0664298
673	0.12123	0.756038	0.322329	0.323127	9	ARHGAP1	0.940775	X	G	0.037781
674	0.432414	0.245068	1.22462	1.26881	9	ARHGAP10	0.770597	A	G	-0.110912
675	0.746478	0.0208642	2.55303	2.96809	9	ARHGAP12	0.391318	A	G	-0.000598139
676	0.337406	0.374556	0.929089	0.948302	9	ARHGAP15	0.836502	B	G	0.0573993
677	0.419446	0.261083	1.1827	1.22249	9	ARHGAP17	0.77885	X	G	-0.11464
678	0.377122	0.317059	1.04957	1.07732	9	ARHGAP18	0.806129	B	G	0.56257
679	0.813471	0.00764982	3.00876	3.70051	9	ARHGAP19	0.27033	B	G	0.0555131
680	-0.0124825	0.974574	-0.0330274	0.0330282	9	ARHGAP20	0.993422	A	G	-0.20356
681	0.186908	0.630146	0.500393	0.503382	9	ARHGAP21	0.904552	A	G	0.224541
682	-0.209571	0.588384	-0.562811	0.567065	9	ARHGAP22	0.891936	F	G	-0.0458535
683	0.327444	0.3897	0.899456	0.916882	9	ARHGAP23	0.845305	B	G	0.1075
684	0.84319	0.00429747	3.25985	4.14956	9	ARHGAP24	0.215914	G	G	0.638721
685	0.348877	0.357471	0.96349	0.984927	9	ARHGAP25	0.828993	C	G	0.155456
686	-0.0381622	0.922351	-0.101017	0.101041	9	ARHGAP26	0.982916	D	G	0.250671
687	0.0750334	0.847859	0.198894	0.199081	9	ARHGAP27	0.964009	B	G	-0.0145967
688	0.496727	0.173736	1.44181	1.51424	9	ARHGAP28	0.703752	X	G	-0.0262141
689	0.803883	0.00902604	2.93544	3.57585	9	ARHGAP29	0.288515	A	G	-0.147075
690	0.183122	0.637216	0.490022	0.492828	9	ARHGAP30	0.906601	X	G	0.0730081
691	-0.0864597	0.824959	-0.229323	0.229611	9	ARHGAP31	0.959573	A	G	-0.300732
692	-0.291075	0.447313	-0.793038	0.804966	9	ARHGAP32	0.868047	A	G	-0.168492
693	-0.406334	0.277824	-1.14088	1.17657	9	ARHGAP35	0.789082	D	G	-0.0629769
694	0.262473	0.495049	0.711078	0.719669	9	ARHGAP36	0.870586	B	G	0.656014
695	-0.392922	0.295508	-1.09865	1.1305	9	ARHGAP39	0.795856	X	G	-0.213494
696	0.823988	0.00631219	3.09319	3.84758	9	ARHGAP40	0.251371	A	G	-0.117526
697	0.838558	0.0047357	3.21802	4.07226	9	ARHGAP42	0.22625	A	G	0.333685
698	-0.0560165	0.886182	-0.148361	0.148439	9	ARHGAP44	0.974752	B	G	0.106275
699	0.143329	0.712966	0.381842	0.383168	9	ARHGAP45	0.927794	X	G	-0.0453204
700	0.646408	0.0599462	2.03486	2.24149	9	ARHGAP5	0.550638	B	G	-0.29792
701	0.602542	0.0859364	1.84443	1.99749	9	ARHGAP6	0.61719	A	G	-0.163525
702	0.258955	0.501059	0.701092	0.709326	9	ARHGDIA	0.870586	X	G	0.110344
703	-0.402093	0.283354	-1.12747	1.1619	9	ARHGDIB	0.792685	B	G	-0.233018
704	0.507248	0.163364	1.47902	1.55727	9	ARHGDIG	0.699613	C	G	0.0992653
705	0.601609	0.086553	1.84056	1.99265	9	ARHGEF10	0.61962	A	G	-0.191816
706	-0.11175	0.774701	-0.296902	0.297525	9	ARHGEF10L	0.946388	B	G	-0.103062
707	-0.0293483	0.940255	-0.0776707	0.0776819	9	ARHGEF11	0.987598	B	G	-0.15748
708	0.567861	0.110712	1.70482	1.82526	9	ARHGEF12	0.662675	X	G	0.256396
709	0.105043	0.787966	0.278947	0.279464	9	ARHGEF16	0.948226	X	G	-0.0916865
710	-0.902599	0.00086229	-3.93177	5.54738	9	ARHGEF17	0.122225	D	G	-0.0190964
711	0.250431	0.515743	0.676975	0.684386	9	ARHGEF18	0.870586	B	G	0.319492
712	-0.457175	0.215998	-1.3063	1.36002	9	ARHGEF2	0.745388	D	G	-0.149417
713	0.259983	0.499299	0.704009	0.712346	9	ARHGEF26	0.870586	C	G	-0.00514239
714	-0.036485	0.925756	-0.0965731	0.0965945	9	ARHGEF28	0.984161	E	G	-0.20357
715	-0.340178	0.370393	-0.937374	0.957108	9	ARHGEF3	0.834239	F	G	-0.317203
716	0.405891	0.278399	1.13948	1.17503	9	ARHGEF33	0.789389	X	G	-0.054637
717	-0.37203	0.324168	-1.0339	1.06041	9	ARHGEF37	0.809024	X	G	-0.126478
718	-0.342746	0.366556	-0.945063	0.965289	9	ARHGEF38	0.832371	A	G	-0.132677
719	0.791272	0.0110787	2.84372	3.42376	9	ARHGEF39	0.314301	E	G	0.14914
720	-0.639324	0.0637516	-2.00291	2.19978	9	ARHGEF4	0.56191	B	G	-0.146402
721	-0.103216	0.791588	-0.274059	0.27455	9	ARHGEF5	0.948317	A	G	-0.33865
722	0.0815334	0.834819	0.216197	0.216438	9	ARHGEF6	0.960756	B	G	0.357338
723	-0.278185	0.468571	-0.755929	0.766256	9	ARHGEF7	0.870586	B	G	-0.191758
724	-0.742665	0.0218941	-2.53038	2.93417	9	ARHGEF9	0.398568	A	G	-0.317701
725	0.157414	0.685867	0.419971	0.421737	9	ARID1A	0.920364	B	G	-0.202194
726	0.33981	0.370944	0.936273	0.955937	9	ARID1B	0.834249	A	G	-0.00793562
727	0.590227	0.0942968	1.79386	1.93449	9	ARID2	0.633336	A	G	0.0279773
728	-0.186022	0.631798	-0.497965	0.50091	9	ARID3A	0.905449	A	G	-0.189413
729	0.223044	0.564036	0.600208	0.60537	9	ARID3B	0.880524	A	G	-0.0449859
730	-0.49981	0.17066	-1.45266	1.52675	9	ARID3C	0.699613	X	G	-0.00114994
731	-0.264102	0.492275	-0.71571	0.724471	9	ARID4A	0.870586	A	G	-0.129741
732	0.247278	0.521216	0.668083	0.675206	9	ARID4B	0.87194	A	G	0.120103
733	-0.0413451	0.915892	-0.109451	0.109482	9	ARID5A	0.982076	A	G	0.0491222
734	0.338528	0.372869	0.932439	0.951861	9	ARID5B	0.835751	X	G	0.0651423
735	-0.144961	0.70981	-0.386252	0.387626	9	ARIH1	0.927794	D	G	0.080905
736	-0.178049	0.646727	-0.476149	0.478724	9	ARIH2	0.909532	B	G	-0.219553
737	0.266751	0.48778	0.723249	0.73229	9	ARL1	0.870586	C	G	0.173913
738	-0.0105477	0.978514	-0.0279076	0.0279082	9	ARL11	0.994526	F	G	-0.0703526
739	-0.204564	0.597525	-0.548971	0.552918	9	ARL13A	0.894273	X	G	-0.149531
740	0.516579	0.154472	1.51248	1.59621	9	ARL13B	0.699613	A	G	-0.197819
741	-0.0870575	0.823764	-0.230917	0.23121	9	ARL14	0.958869	C	G	0.127912
742	0.144814	0.710095	0.385854	0.387223	9	ARL14EP	0.927794	A	G	0.0105079
743	0.423678	0.255797	1.19632	1.2375	9	ARL14EPL	0.777117	A	G	0.374186
744	0.544398	0.129665	1.61493	1.71709	9	ARL15	0.690259	E	G	0.194723
745	0.288262	0.451916	0.784915	0.79648	9	ARL16	0.86964	B	G	0.0701616
746	0.0871899	0.8235	0.23127	0.231565	9	ARL2BP	0.958869	A	G	-0.116494
747	-0.388164	0.301917	-1.0838	1.11436	9	ARL3	0.799509	D	G	-0.116886
748	-0.158334	0.684107	-0.422467	0.424264	9	ARL4A	0.919665	A	G	-0.196984
749	-0.508474	0.16218	-1.48339	1.56234	9	ARL4C	0.699613	C	G	-0.118855
750	-0.22108	0.567562	-0.594743	0.599765	9	ARL5A	0.882133	B	G	0.11541
751	-0.44109	0.234654	-1.25299	1.30035	9	ARL5B	0.761004	B	G	-0.0227254
752	-0.67958	0.0440477	-2.19156	2.45092	9	ARL6	0.507176	I	G	0.241211
753	0.381702	0.310733	1.06373	1.09262	9	ARL6IP1	0.805518	F	G	0.0501835
754	0.364098	0.335397	1.00962	1.03431	9	ARL6IP4	0.815034	B	G	-0.047825
755	-0.0762802	0.845355	-0.202211	0.202408	9	ARL6IP5	0.963514	A	G	-0.21404
756	-0.312067	0.413621	-0.854138	0.869052	9	ARL8A	0.855938	D	G	-0.00750715
757	0.0850259	0.827827	0.225502	0.225775	9	ARL8B	0.960396	A	G	0.348693
758	0.229747	0.552065	0.6189	0.62456	9	ARL9	0.879946	X	G	0.259758
759	-0.152938	0.694447	-0.407835	0.409452	9	ARMC1	0.924148	B	G	0.0614023
760	0.442155	0.233393	1.25649	1.30425	9	ARMC10	0.761004	K	G	-0.201253
761	0.216195	0.576367	0.581168	0.585853	9	ARMC2	0.885574	X	G	0.502646
762	0.576139	0.10445	1.73737	1.86495	9	ARMC3	0.650925	A	G	0.408685
763	0.367033	0.331219	1.01859	1.04394	9	ARMC4	0.812739	C	G	0.155497
764	0.0363207	0.926089	0.0961379	0.0961591	9	ARMC6	0.984307	A	G	0.408904
765	0.380102	0.312936	1.05877	1.08726	9	ARMC7	0.805518	X	G	0.110098
766	0.292715	0.444639	0.797782	0.809926	9	ARMC8	0.867648	A	G	-0.0419555
767	-0.219338	0.570696	-0.589899	0.594799	9	ARMC9	0.883969	X	G	0.122642
768	0.168258	0.665212	0.449442	0.451606	9	ARMH3	0.916404	B	G	0.072781
769	-0.336951	0.375242	-0.92773	0.946858	9	ARMH4	0.836502	F	G	-0.378557
770	0.48969	0.180878	1.4172	1.48595	9	ARMT1	0.712577	B	G	0.482231
771	0.348297	0.358326	0.961744	0.983064	9	ARNT	0.829114	A	G	-0.0456223
772	0.919478	0.000450548	4.19521	6.18787	9	ARNT2	0.093138	A	G	0.0586025
773	0.0388522	0.92095	0.102845	0.102871	9	ARNTL	0.982857	B	G	-0.0226635
774	0.462654	0.209837	1.32468	1.38072	9	ARNTL2	0.743375	X	G	0.485469
775	-0.84777	0.00389219	-3.30235	4.22916	9	ARPC1A	0.210299	A	G	-0.288987
776	0.165394	0.67065	0.441647	0.443701	9	ARPC1B	0.916692	C	G	-0.0974155
777	-0.35674	0.345982	-0.987251	1.01032	9	ARPC2	0.820547	A	G	-0.280419
778	-0.398477	0.288116	-1.11607	1.14947	9	ARPC3	0.795045	D	G	0.0363339
779	-0.104117	0.789801	-0.276471	0.276974	9	ARPC4	0.948317	H	G	0.287184
780	-0.216487	0.57584	-0.581979	0.586684	9	ARPC5	0.885507	B	G	0.0347263
781	-0.541126	0.132451	-1.60265	1.70248	9	ARPC5L	0.692362	A	G	0.121348
782	-0.725909	0.0268163	-2.43416	2.79238	9	ARPP19	0.429978	A	G	-0.309735
783	-0.182963	0.637513	-0.489587	0.492386	9	ARPP21	0.906882	B	G	0.124604
784	0.190978	0.622575	0.51156	0.514754	9	ARR3	0.901657	X	G	0.235927
785	-0.612983	0.0792187	-1.88823	2.05266	9	ARRB1	0.601481	D	G	0.0478762
786	-0.357055	0.345526	-0.988206	1.01134	9	ARRDC1	0.820132	A	G	-0.342114
787	-0.579186	0.1022	-1.74947	1.87977	9	ARRDC2	0.64688	B	G	-0.0550682
788	0.0556192	0.886985	0.147307	0.147383	9	ARRDC3	0.975055	E	G	0.262967
789	0.558346	0.118182	1.66795	1.78065	9	ARRDC4	0.675086	A	G	-0.12013
790	0.273049	0.47716	0.741221	0.750955	9	ARSA	0.870586	B	G	-0.236271
791	0.923771	0.000373525	4.27064	6.3823	9	ARSB	0.088713	E	G	0.487465
792	0.70336	0.0345128	2.31217	2.61793	9	ARSG	0.467725	C	G	0.0360334
793	0.0727625	0.852422	0.192852	0.193023	9	ARSI	0.965988	F	G	-0.110976
794	0.266241	0.488643	0.721798	0.730785	9	ARSJ	0.870586	X	G	-0.0456524
795	-0.378297	0.31543	-1.0532	1.08123	9	ARSK	0.806039	E	G	0.0051386
796	0.0145043	0.970457	0.0383776	0.0383789	9	ARTN	0.992677	X	G	-0.0418439
797	0.194682	0.615711	0.521739	0.525127	9	ARV1	0.899846	B	G	0.185206
798	0.00467046	0.990486	0.012357	0.012357	9	ARVCF	0.997838	A	G	-0.225805
799	0.90287	0.000854159	3.93564	5.55638	9	ARX	0.122225	A	G	-0.13273
800	0.213646	0.580981	0.574098	0.578613	9	AS3MT	0.88828	X	G	0.0443631
801	0.890087	0.00129974	3.76318	5.16675	9	ASAH1	0.140878	A	G	0.435822
802	-0.200201	0.605531	-0.536934	0.540628	9	ASAP1	0.897372	A	G	-0.189675
803	0.790126	0.0112794	2.83563	3.41055	9	ASAP2	0.315828	A	G	-0.0275451
804	0.225425	0.559773	0.606841	0.612176	9	ASAP3	0.880099	C	G	-0.0872388
805	0.189253	0.62578	0.506826	0.509931	9	ASB1	0.902809	B	G	-0.0404637
806	0.00893166	0.981806	0.0236316	0.0236319	9	ASB10	0.995458	G	G	0.523671
807	-0.00482903	0.990163	-0.0127765	0.0127766	9	ASB11	0.99774	X	G	-0.0291417
808	0.00532121	0.98916	0.0140787	0.0140788	9	ASB12	0.997454	X	G	-0.110146
809	0.13186	0.735238	0.350913	0.351942	9	ASB13	0.934772	X	G	0.0657979
810	0.679944	0.0438902	2.19336	2.45337	9	ASB14	0.506378	X	G	0.176843
811	0.708862	0.0325174	2.3412	2.65893	9	ASB15	0.460516	G	G	0.612338
812	0.0301039	0.938719	0.0796715	0.0796836	9	ASB16	0.987524	X	G	-0.0997356
813	0.257713	0.503187	0.697571	0.705681	9	ASB2	0.870586	F	G	-0.0775013
814	0.20228	0.601712	0.542667	0.54648	9	ASB3	0.895999	X	G	0.060349
815	-0.243422	0.527944	-0.657226	0.664006	9	ASB4	0.873825	X	G	0.126411
816	-0.182884	0.637661	-0.489371	0.492166	9	ASB5	0.906964	A	G	0.235371
817	-0.124654	0.749323	-0.331527	0.332395	9	ASB6	0.93877	X	G	0.254273
818	0.740225	0.0225701	2.51605	2.91281	9	ASB7	0.404295	D	G	-0.36348
819	-0.301202	0.430914	-0.822407	0.835714	9	ASB8	0.861852	D	G	0.0169498
820	0.0967517	0.80443	0.256784	0.257188	9	ASCC1	0.953116	E	G	0.106493
821	-0.492223	0.178289	-1.42603	1.49609	9	ASCC2	0.708739	B	G	0.0746583
822	0.430362	0.247565	1.21795	1.26142	9	ASCC3	0.771551	A	G	-0.159909
823	0.637011	0.0650264	1.99259	2.18637	9	ASCL1	0.565933	C	G	0.141508
824	-0.12581	0.747059	-0.334634	0.335527	9	ASCL2	0.937984	X	G	0.015103
825	-0.546405	0.127973	-1.62249	1.72611	9	ASCL3	0.690259	X	G	-0.144381
826	0.227641	0.555816	0.61302	0.61852	9	ASCL4	0.879946	X	G	0.134953
827	0.452808	0.22098	1.29173	1.34366	9	ASDURF	0.751797	E	G	0.155603
828	0.556807	0.119418	1.66204	1.77353	9	ASF1A	0.676204	X	G	0.0795503
829	0.139048	0.721258	0.370285	0.371495	9	ASH1L	0.931312	A	G	-0.130067
830	-0.293583	0.443227	-0.800294	0.812554	9	ASH2L	0.866574	D	G	0.0742885
831	-0.341329	0.36867	-0.940819	0.960772	9	ASIC1	0.833555	D	G	-0.128975
832	-0.745532	0.0211167	-2.54738	2.95961	9	ASIC3	0.392067	A	G	0.0764027
833	-0.576663	0.10406	-1.73945	1.86749	9	ASIC4	0.650343	A	G	-0.32065
834	-0.211005	0.585776	-0.56678	0.571125	9	ASIC5	0.891009	X	G	-0.0292006
835	0.326135	0.391711	0.895578	0.912779	9	ASIP	0.846588	J	G	-0.121705
836	0.33131	0.38379	0.91093	0.929034	9	ASMT	0.840677	C	G	-0.0705274
837	-0.178709	0.645488	-0.477951	0.480555	9	ASMTL	0.909532	A	G	-0.124373
838	0.763819	0.0165854	2.65982	3.13105	9	ASNS	0.358373	D	G	0.1177
839	0.8748	0.00201868	3.58016	4.77725	9	ASPA	0.165567	X	G	0.16042
840	-0.121102	0.756289	-0.321985	0.32278	9	ASPDH	0.940862	X	G	-0.0790706
841	0.34814	0.358558	0.96127	0.982559	9	ASPG	0.829114	B	G	-0.00803808
842	0.112343	0.773531	0.29849	0.299124	9	ASPH	0.94621	C	G	0.2993
843	-0.469644	0.202119	-1.34831	1.40743	9	ASPHD2	0.735551	X	G	-0.185225
844	0.197501	0.610504	0.529497	0.533039	9	ASPM	0.898148	X	G	0.283242
845	0.183288	0.636904	0.490478	0.493292	9	ASPN	0.906601	X	G	-0.0983597
846	0.309326	0.417953	0.846112	0.860609	9	ASPSCR1	0.858028	A	G	-0.103945
847	0.223442	0.563323	0.601316	0.606506	9	ASRGL1	0.880524	B	G	0.124946
848	0.752379	0.0193349	2.58864	3.02188	9	ASS1	0.379729	A	G	0.100276
849	0.497107	0.173356	1.44314	1.51577	9	ASTE1	0.702959	A	G	-0.0402135
850	-0.131184	0.736558	-0.349091	0.350105	9	ASTN1	0.935077	A	G	-0.0704755
851	0.296297	0.438823	0.808157	0.820783	9	ASTN2	0.864883	B	G	-0.201117
852	-0.170554	0.660863	-0.455696	0.457952	9	ASXL1	0.91458	B	G	0.225483
853	0.228959	0.553466	0.616701	0.6223	9	ASXL2	0.879946	X	G	-0.036752
854	0.235403	0.542038	0.63472	0.640826	9	ASXL3	0.877506	C	G	0.271606
855	0.634008	0.0667047	1.97926	2.16911	9	ASZ1	0.568933	K	G	0.276904
856	0.360196	0.34099	0.997744	1.02156	9	ATAD1	0.817867	A	G	0.50516
857	0.609599	0.0813589	1.87394	2.0346	9	ATAD2	0.606541	A	G	0.0306517
858	0.623463	0.0728135	1.93312	2.10977	9	ATAD2B	0.586067	A	G	0.0112457
859	-0.142213	0.715124	-0.378828	0.380124	9	ATAD3A	0.92891	D	G	-0.059082
860	0.749444	0.0200858	2.57084	2.99493	9	ATAD5	0.386869	A	G	0.268
861	0.16625	0.669023	0.443976	0.446063	9	ATAT1	0.916692	D	G	0.181677
862	0.223622	0.563	0.601818	0.607022	9	ATCAY	0.880524	A	G	0.154045
863	0.622648	0.0732995	1.92959	2.10526	9	ATE1	0.587044	F	G	0.112684
864	-0.584093	0.0986399	-1.76909	1.90389	9	ATF1	0.642923	B	G	-0.138769
865	-0.300764	0.431616	-0.821135	0.834381	9	ATF2	0.862114	B	G	0.188987
866	0.616814	0.0768383	1.90453	2.07333	9	ATF3	0.595381	F	G	0.134694
867	-0.235358	0.542118	-0.634594	0.640696	9	ATF4	0.877506	D	G	0.0421686
868	-0.196181	0.612941	-0.525862	0.529332	9	ATF6	0.899441	D	G	0.0252192
869	0.813367	0.00766392	3.00795	3.69912	9	ATF7IP	0.27033	A	G	0.109351
870	-0.189328	0.62564	-0.507032	0.510141	9	ATG10	0.902809	F	G	-0.128539
871	0.150263	0.699588	0.400592	0.402125	9	ATG101	0.925644	D	G	0.117954
872	-0.172134	0.657875	-0.460003	0.462325	9	ATG12	0.913708	E	G	0.285767
873	0.0819593	0.833966	0.217332	0.217576	9	ATG13	0.960756	D	G	-0.0483071
874	-0.204332	0.59795	-0.54833	0.552264	9	ATG14	0.894316	C	G	-0.367259
875	-0.051908	0.894491	-0.137459	0.137521	9	ATG16L1	0.976945	X	G	-0.0980984
876	0.511145	0.159616	1.49294	1.57344	9	ATG2B	0.699613	A	G	-0.140726
877	0.445772	0.229137	1.2684	1.31755	9	ATG3	0.758947	G	G	0.512079
878	0.0216192	0.955975	0.057208	0.0572124	9	ATG4A	0.990452	B	G	-0.181374
879	-0.0134283	0.972648	-0.0355301	0.0355312	9	ATG4B	0.993103	X	G	-0.0226738
880	-0.396497	0.290739	-1.10985	1.14269	9	ATG4C	0.795522	B	G	-0.248175
881	-0.405345	0.279109	-1.13775	1.17314	9	ATG4D	0.789438	D	G	-0.0918816
882	0.6294	0.0693331	1.95897	2.14294	9	ATG5	0.574535	B	G	0.510243
883	-0.20674	0.593546	-0.554982	0.559061	9	ATG7	0.893234	B	G	-0.118327
884	0.143806	0.712043	0.38313	0.38447	9	ATG9A	0.927794	F	G	-0.0529147
885	0.0506572	0.897022	0.134141	0.134199	9	ATG9B	0.977695	X	G	-0.218633
886	0.822447	0.0064973	3.08054	3.82531	9	ATIC	0.253663	X	G	-0.0467263
887	-0.692867	0.0385352	-2.25801	2.54229	9	ATL1	0.482146	A	G	0.00593477
888	-0.0778611	0.842182	-0.206419	0.206628	9	ATL2	0.962556	A	G	-0.096529
889	0.45456	0.218974	1.29756	1.35021	9	ATM	0.74904	D	G	-0.0427831
890	0.565326	0.112673	1.69494	1.81328	9	ATMIN	0.663529	B	G	0.190622
891	0.323565	0.395672	0.887978	0.904743	9	ATN1	0.848467	B	G	0.0627781
892	NA	NA	NA	NA	9	ATOH1	NA	X	G	-0.0108399
893	0.550064	0.124924	1.63633	1.74266	9	ATOH7	0.686128	X	G	0.121514
894	0.83532	0.00505965	3.18941	4.01999	9	ATOH8	0.231541	X	G	0.212137
895	-0.0426178	0.913311	-0.112824	0.112859	9	ATOX1	0.982008	H	G	-0.0553546
896	0.880848	0.00170797	3.64992	4.92291	9	ATP10A	0.151541	C	G	-0.0789414
897	-0.018016	0.963308	-0.047671	0.0476736	9	ATP10B	0.991532	X	G	-0.0944767
898	0.569301	0.109606	1.71045	1.83211	9	ATP10D	0.660548	A	G	-0.0328521
899	0.527686	0.144262	1.55288	1.64359	9	ATP11A	0.699613	A	G	-0.0454216
900	0.84896	0.00379144	3.31358	4.25036	9	ATP11B	0.209639	G	G	0.616121
901	0.722815	0.0277981	2.41693	2.7674	9	ATP11C	0.434795	A	G	0.080786
902	-0.675603	0.0457909	-2.17211	2.42447	9	ATP12A	0.512896	B	G	-0.150104
903	-0.176283	0.650049	-0.471325	0.473822	9	ATP13A1	0.910371	B	G	-0.0344149
904	-0.195685	0.613857	-0.524498	0.52794	9	ATP13A2	0.899528	X	G	-0.131821
905	0.502955	0.167552	1.46377	1.5396	9	ATP13A3	0.699613	D	G	-0.149599
906	-0.0270353	0.944958	-0.071546	0.0715547	9	ATP13A4	0.988796	B	G	0.190124
907	-0.496232	0.174233	-1.44007	1.51224	9	ATP1A1	0.703949	B	G	0.172798
908	0.240121	0.533727	0.647952	0.654449	9	ATP1B1	0.875372	B	G	-0.0574643
909	0.297546	0.436803	0.811782	0.824579	9	ATP1B3	0.864381	A	G	0.381417
910	-0.319617	0.401793	-0.876328	0.892439	9	ATP1B4	0.850494	X	G	-0.154203
911	-0.0395978	0.919437	-0.104821	0.104848	9	ATP23	0.982486	X	G	-0.113275
912	0.330248	0.38541	0.907773	0.925689	9	ATP2A1	0.841946	C	G	0.115143
913	-0.297272	0.437245	-0.810988	0.823748	9	ATP2A2	0.864525	A	G	-0.433411
914	0.578427	0.102758	1.74645	1.87607	9	ATP2A3	0.648567	B	G	0.712146
915	0.414809	0.266941	1.16785	1.20615	9	ATP2B1	0.78223	F	G	0.183769
916	-0.0142623	0.97095	-0.0377371	0.0377383	9	ATP2B2	0.992772	A	G	-0.384785
917	-0.665485	0.0504232	-2.12346	2.3589	9	ATP2B4	0.522204	A	G	0.169185
918	0.0709187	0.85613	0.187949	0.188107	9	ATP2C1	0.966886	A	G	-0.176455
919	0.410885	0.271951	1.15534	1.1924	9	ATP2C2	0.785596	X	G	0.0462172
920	0.508345	0.162304	1.48293	1.56181	9	ATP4A	0.699613	D	G	-0.0785747
921	-0.212614	0.582853	-0.571237	0.575686	9	ATP4B	0.889449	E	G	0.0123699
922	-0.00608695	0.9876	-0.0161048	0.0161049	9	ATP5F1A	0.997299	E	G	0.151522
923	-0.571962	0.107582	-1.72089	1.84482	9	ATP5F1B	0.655892	D	G	-0.207079
924	-0.285137	0.457054	-0.775905	0.787074	9	ATP5F1C	0.870586	D	G	-0.229743
925	-0.370145	0.326819	-1.02812	1.05419	9	ATP5F1D	0.809158	D	G	-0.103633
926	-0.410623	0.272288	-1.1545	1.19149	9	ATP5F1E	0.785596	H	G	-0.0316251
927	-0.460748	0.211969	-1.31827	1.3735	9	ATP5IF1	0.743858	D	G	-0.00189352
928	-0.426894	0.251818	-1.20671	1.24898	9	ATP5MC1	0.774101	D	G	-0.227822
929	0.0158475	0.967722	0.0419322	0.0419339	9	ATP5MC3	0.992267	B	G	-0.12253
930	-0.313847	0.410818	-0.85936	0.87455	9	ATP5MD	0.854249	H	G	-0.112881
931	-0.309776	0.41724	-0.847429	0.861994	9	ATP5ME	0.857729	E	G	0.014199
932	-0.849034	0.00378522	-3.31428	4.25169	9	ATP5MF	0.209639	H	G	-0.386818
933	-0.478329	0.192753	-1.37795	1.44109	9	ATP5MG	0.725551	H	G	-0.146612
934	-0.310501	0.416094	-0.849549	0.864223	9	ATP5MPL	0.856814	H	G	-0.014344
935	-0.218178	0.572787	-0.586675	0.591494	9	ATP5PB	0.884266	D	G	-0.204026
936	-0.192122	0.620451	-0.514704	0.517957	9	ATP5PD	0.901281	B	G	-0.312354
937	0.0392139	0.920216	0.103803	0.10383	9	ATP5PF	0.982572	H	G	0.0130123
938	-0.146785	0.706288	-0.391184	0.39261	9	ATP5PO	0.927273	B	G	-0.249231
939	0.703772	0.0343606	2.31433	2.62097	9	ATP6AP1	0.467725	X	G	0.385232
940	-0.401553	0.284062	-1.12577	1.16004	9	ATP6AP1L	0.792913	E	G	-0.0433633
941	-0.588456	0.0955382	-1.78668	1.92561	9	ATP6AP2	0.634979	A	G	-0.0424125
942	-0.396436	0.290821	-1.10966	1.14248	9	ATP6V0A1	0.795522	B	G	0.0178475
943	0.22159	0.566646	0.596162	0.601219	9	ATP6V0A2	0.881844	B	G	0.00616317
944	0.306822	0.421928	0.838792	0.852914	9	ATP6V0A4	0.85979	X	G	-0.00588363
945	-0.802031	0.00930989	-2.92165	3.55271	9	ATP6V0B	0.29039	A	G	-0.157657
946	-0.337691	0.374127	-0.92994	0.949206	9	ATP6V0C	0.836502	A	G	0.25848
947	-0.123564	0.751459	-0.328598	0.329443	9	ATP6V0D1	0.939417	A	G	0.207735
948	0.172167	0.657813	0.460093	0.462415	9	ATP6V0D2	0.913708	X	G	-0.0350839
949	0.230986	0.549862	0.622363	0.628118	9	ATP6V0E1	0.879946	I	G	-0.0566395
950	-0.0414558	0.915668	-0.109745	0.109776	9	ATP6V1A	0.982076	A	G	0.0920445
951	-0.0195855	0.960114	-0.0518249	0.0518282	9	ATP6V1B1	0.991035	X	G	-0.0194654
952	-0.203232	0.599966	-0.545293	0.549162	9	ATP6V1B2	0.895184	A	G	0.168904
953	-0.494588	0.17589	-1.4343	1.5056	9	ATP6V1C1	0.70524	A	G	-0.000374687
954	-0.415666	0.265853	-1.17059	1.20916	9	ATP6V1C2	0.781754	X	G	-0.215638
955	-0.196986	0.611454	-0.528079	0.531592	9	ATP6V1D	0.89863	A	G	0.343937
956	-0.0121909	0.975168	-0.0322558	0.0322566	9	ATP6V1E1	0.993508	A	G	0.236407
957	-0.419051	0.261579	-1.18144	1.22109	9	ATP6V1F	0.778911	D	G	0.0200893
958	-0.441793	0.233822	-1.25529	1.30292	9	ATP6V1G1	0.761004	A	G	-0.000183916
959	0.313808	0.41088	0.859243	0.874427	9	ATP6V1G3	0.854249	X	G	0.0235367
960	-0.437824	0.238546	-1.24227	1.28843	9	ATP6V1H	0.764602	B	G	0.0464613
961	0.195928	0.613408	0.525166	0.528621	9	ATP7A	0.899528	A	G	-0.135703
962	0.395361	0.29225	1.10629	1.13881	9	ATP7B	0.795522	A	G	-0.184392
963	-0.209791	0.587983	-0.56342	0.567688	9	ATP8A1	0.891833	B	G	0.444658
964	0.703221	0.0345641	2.31145	2.61691	9	ATP8A2	0.467725	F	G	0.271872
965	0.0693915	0.859203	0.183888	0.184036	9	ATP8B2	0.967269	D	G	-0.0328009
966	0.841045	0.00449675	3.24034	4.11339	9	ATP8B3	0.219924	X	G	0.0100805
967	0.20223	0.601803	0.54253	0.54634	9	ATP9A	0.896069	X	G	0.20117
968	0.554266	0.121475	1.65232	1.76184	9	ATP9B	0.680397	D	G	-0.0464985
969	-0.519286	0.151946	-1.52226	1.60765	9	ATPAF1	0.699613	X	G	-0.223403
970	-0.320846	0.399884	-0.87995	0.896263	9	ATPAF2	0.850494	A	G	0.195234
971	0.376563	0.317835	1.04785	1.07546	9	ATPSCKMT	0.806129	A	G	0.641517
972	0.405947	0.278326	1.13965	1.17523	9	ATR	0.789389	A	G	0.0153211
973	-0.194	0.616973	-0.519863	0.523215	9	ATRAID	0.899846	D	G	-0.0656958
974	0.629888	0.0690516	1.96111	2.14569	9	ATRIP	0.574056	A	G	0.0873102
975	0.0188875	0.961534	0.0499775	0.0499805	9	ATRN	0.99136	X	G	-0.0833385
976	-0.286829	0.45427	-0.78078	0.792162	9	ATRNL1	0.869927	B	G	0.406656
977	0.447714	0.226869	1.27482	1.32473	9	ATRX	0.758046	A	G	-0.0896493
978	-0.219352	0.570671	-0.589937	0.594838	9	ATXN1	0.883969	A	G	-0.40733
979	0.387685	0.302566	1.0823	1.11274	9	ATXN10	0.799577	X	G	0.150306
980	-0.462109	0.210445	-1.32285	1.37866	9	ATXN1L	0.743375	B	G	-0.131659
981	0.526908	0.144964	1.55003	1.64023	9	ATXN2	0.699613	B	G	0.0316072
982	0.497855	0.172607	1.44577	1.51881	9	ATXN3	0.701481	D	G	0.202283
983	0.535017	0.137746	1.57991	1.67549	9	ATXN7	0.699613	A	G	0.0172257
984	0.765466	0.0162124	2.67032	3.14733	9	ATXN7L1	0.354432	A	G	-0.0861345
985	-0.202077	0.602085	-0.542106	0.545907	9	ATXN7L2	0.896223	X	G	-0.0777636
986	-0.0928075	0.812286	-0.246254	0.24661	9	ATXN7L3	0.955896	A	G	-0.0232692
987	0.111116	0.775953	0.295203	0.295816	9	AUH	0.946388	B	G	-0.126476
988	-0.31189	0.4139	-0.85362	0.868507	9	AUP1	0.855938	D	G	-0.00688466
989	-0.138267	0.722774	-0.368178	0.369368	9	AURKA	0.93197	X	G	0.238585
990	-0.306904	0.421798	-0.839031	0.853165	9	AURKAIP1	0.85979	X	G	0.13552
991	0.262482	0.495032	0.711106	0.719698	9	AUTS2	0.870586	A	G	-0.169682
992	0.647308	0.0594734	2.03895	2.24686	9	AVEN	0.549654	A	G	0.689649
993	0.342742	0.366562	0.945051	0.965276	9	AVL9	0.832371	B	G	0.294852
994	0.269251	0.483552	0.730376	0.739688	9	AVPI1	0.870586	A	G	0.297931
995	0.145375	0.709011	0.387371	0.388756	9	AVPR1A	0.927794	X	G	-0.10469
996	NA	NA	NA	NA	9	AVPR1B	NA	X	G	-0.0557091
997	0.168811	0.664163	0.45095	0.453136	9	AXIN1	0.916004	C	G	-0.141229
998	0.328072	0.388736	0.901319	0.918854	9	AXIN2	0.844556	X	G	0.165255
999	0.0247569	0.949591	0.0655141	0.0655208	9	AZI2	0.989145	B	G	-0.010789
1000	0.59778	0.0891128	1.82473	1.97287	9	AZIN1	0.623914	G	G	0.554197
1001	-0.674253	0.0463922	-2.16555	2.41558	9	AZIN2	0.513387	B	G	-0.245664
1002	0.815158	0.00742332	3.02201	3.72335	9	B2M	0.27033	C	G	0.0514909
1003	0.535006	0.137756	1.57986	1.67544	9	B3GALNT1	0.699613	B	G	-0.136994
1004	0.466554	0.205511	1.33784	1.39558	9	B3GALNT2	0.740001	A	G	0.205912
1005	0.509161	0.161518	1.48585	1.56519	9	B3GALT1	0.699613	C	G	-0.0687078
1006	0.161499	0.678064	0.431061	0.432971	9	B3GALT2	0.918449	B	G	0.313697
1007	0.761727	0.0170673	2.64659	3.11058	9	B3GALT5	0.361909	A	G	-0.163222
1008	-0.221673	0.566498	-0.596391	0.601454	9	B3GALT6	0.881844	X	G	0.353825
1009	0.425717	0.25327	1.2029	1.24477	9	B3GAT1	0.774486	X	G	-0.151064
1010	-0.817069	0.00717249	-3.03715	3.74954	9	B3GAT2	0.267141	X	G	-0.0902157
1011	0.649258	0.0584567	2.04785	2.25854	9	B3GLCT	0.54715	A	G	0.219766
1012	-0.45922	0.213687	-1.31315	1.36773	9	B3GNT2	0.744861	B	G	-0.277199
1013	0.151805	0.696622	0.404768	0.406349	9	B3GNT4	0.924775	X	G	0.0507351
1014	0.698296	0.036418	2.28584	2.58102	9	B3GNT5	0.47574	A	G	0.0865192
1015	-0.498108	0.172354	-1.44666	1.51983	9	B3GNT7	0.700898	C	G	-0.217372
1016	0.168479	0.664793	0.450044	0.452217	9	B3GNT9	0.91637	C	G	-0.119235
1017	0.451262	0.222758	1.28659	1.3379	9	B3GNTL1	0.753755	A	G	-0.0688434
1018	-0.353274	0.351024	-0.976759	0.999099	9	B4GALNT3	0.823464	A	G	-0.279764
1019	-0.141953	0.715628	-0.378125	0.379414	9	B4GALNT4	0.929029	D	G	-0.0349579
1020	0.60789	0.082453	1.86676	2.02555	9	B4GALT1	0.610461	C	G	0.176552
1021	-0.635544	0.0658429	-1.98607	2.17792	9	B4GALT2	0.567043	D	G	0.0255199
1022	-0.604939	0.0843639	-1.85441	2.01001	9	B4GALT3	0.615099	D	G	-0.00261965
1023	-0.420279	0.260038	-1.18538	1.22544	9	B4GALT4	0.77885	A	G	-0.346104
1024	0.726261	0.0267061	2.43613	2.79525	9	B4GALT5	0.429978	C	G	0.234254
1025	-0.281401	0.463228	-0.76516	0.775871	9	B4GALT6	0.870586	A	G	-0.246346
1026	0.119406	0.759619	0.317434	0.318196	9	B4GALT7	0.941064	A	G	-0.000942491
1027	-0.0937808	0.810346	-0.248852	0.249219	9	B4GAT1	0.955722	D	G	-0.0022047
1028	-0.17802	0.646781	-0.47607	0.478643	9	B9D1	0.909532	X	G	0.0785375
1029	-0.813315	0.00767096	-3.00754	3.69842	9	BAALC	0.27033	B	G	-0.0268383
1030	-0.425779	0.253194	-1.2031	1.245	9	BABAM1	0.774486	D	G	0.19277
1031	0.364138	0.335341	1.00975	1.03444	9	BABAM2	0.815034	B	G	0.408297
1032	-0.567103	0.111296	-1.70186	1.82167	9	BACE1	0.662675	D	G	0.268591
1033	0.823293	0.00639531	3.08746	3.83749	9	BACE2	0.251371	B	G	0.345993
1034	0.308374	0.419463	0.843325	0.857678	9	BACH1	0.858536	A	G	-0.258958
1035	0.499534	0.170933	1.45169	1.52563	9	BACH2	0.699613	C	G	0.218378
1036	0.419222	0.261364	1.18198	1.2217	9	BAG1	0.77885	X	G	0.217468
1037	0.582322	0.0999159	1.76199	1.89515	9	BAG2	0.643296	C	G	0.20349
1038	-0.229597	0.552332	-0.618481	0.62413	9	BAG3	0.879946	C	G	-0.148498
1039	-0.322091	0.397953	-0.883623	0.900142	9	BAG4	0.849583	B	G	-0.12404
1040	0.37811	0.31569	1.05262	1.08061	9	BAG5	0.806039	F	G	0.432715
1041	0.425504	0.253534	1.20221	1.24401	9	BAHCC1	0.774518	B	G	-0.0275116
1042	-0.354697	0.34895	-0.981062	1.0037	9	BAHD1	0.822574	C	G	0.0580436
1043	-0.528874	0.143194	-1.55724	1.64872	9	BAIAP2	0.699613	B	G	-0.135738
1044	0.511153	0.159608	1.49297	1.57347	9	BAIAP2L1	0.699613	X	G	-0.135908
1045	0.652183	0.0569529	2.06127	2.27622	9	BAIAP2L2	0.540473	X	G	-0.0334975
1046	-0.309152	0.41823	-0.845601	0.86007	9	BAK1	0.858028	X	G	0.00506356
1047	-0.379848	0.313287	-1.05799	1.08641	9	BAMBI	0.805566	A	G	-0.0165114
1048	0.0495028	0.899359	0.131079	0.131133	9	BANK1	0.978883	B	G	0.492345
1049	-0.296006	0.439293	-0.807316	0.819902	9	BANP	0.865466	X	G	-0.131714
1050	-0.570583	0.108628	-1.71547	1.83822	9	BAP1	0.657673	B	G	-0.11428
1051	0.259404	0.500289	0.702366	0.710645	9	BARD1	0.870586	B	G	0.428571
1052	0.110945	0.77629	0.294746	0.295356	9	BARHL1	0.946388	X	G	-0.0023912
1053	0.723747	0.0274999	2.4221	2.77489	9	BARHL2	0.433934	X	G	-0.00738466
1054	0.73184	0.0249987	2.46763	2.84128	9	BARX1	0.418426	G	G	0.805189
1055	-0.438817	0.23736	-1.24553	1.29204	9	BARX2	0.763691	B	G	0.401989
1056	-0.0962122	0.805504	-0.255343	0.25574	9	BASP1	0.953613	F	G	0.0770028
1057	-0.104651	0.788742	-0.277899	0.27841	9	BATF	0.948261	A	G	-0.00814347
1058	0.578857	0.102442	1.74816	1.87817	9	BATF3	0.647439	C	G	0.107401
1059	-0.623936	0.0725322	-1.93517	2.11239	9	BAZ1A	0.585592	A	G	-0.310353
1060	0.471365	0.200243	1.35416	1.41406	9	BAZ1B	0.733232	A	G	-0.108713
1061	-0.0387743	0.921108	-0.102639	0.102664	9	BAZ2A	0.982869	B	G	-0.115997
1062	0.454147	0.219446	1.29619	1.34866	9	BAZ2B	0.749835	A	G	-0.0801203
1063	0.0968797	0.804175	0.257126	0.257531	9	BBIP1	0.952977	A	G	-0.0298457
1064	-0.0989274	0.800103	-0.262596	0.263028	9	BBOX1	0.950949	X	G	-0.0415754
1065	-0.61037	0.080868	-1.87719	2.0387	9	BBS10	0.605584	A	G	-0.258165
1066	-0.295344	0.440367	-0.805396	0.817892	9	BBS12	0.865879	E	G	-0.0238683
1067	-0.0334976	0.931823	-0.0886595	0.0886761	9	BBS2	0.986016	A	G	-0.183826
1068	-0.318261	0.403907	-0.872332	0.888223	9	BBS4	0.850923	B	G	0.185825
1069	0.563337	0.114227	1.68722	1.80392	9	BBS5	0.666793	G	G	0.561525
1070	0.617309	0.076534	1.90665	2.07602	9	BBS7	0.594085	A	G	-0.161442
1071	0.843085	0.00430708	3.25889	4.14777	9	BBS9	0.215914	A	G	0.272644
1072	-0.0683996	0.8612	-0.181251	0.181393	9	BBX	0.968001	B	G	-0.478346
1073	0.201059	0.603954	0.5393	0.543042	9	BCAN	0.896587	X	G	-0.153876
1074	0.917787	0.000483713	4.16655	6.11535	9	BCAP29	0.096014	G	G	0.796346
1075	-0.270753	0.48102	-0.734662	0.744139	9	BCAR1	0.870586	H	G	-0.204166
1076	0.771896	0.0148098	2.7119	3.21234	9	BCAR3	0.346862	X	G	0.258001
1077	0.398692	0.287831	1.11675	1.15021	9	BCAS1	0.795045	I	G	-0.209616
1078	-0.0242722	0.950577	-0.0642308	0.0642371	9	BCAS2	0.989145	X	G	0.335657
1079	0.177604	0.647563	0.474934	0.477488	9	BCAS3	0.90961	B	G	0.175164
1080	0.60536	0.0840897	1.85617	2.01222	9	BCAT1	0.614585	C	G	0.198415
1081	0.0647374	0.868578	0.171519	0.171639	9	BCCIP	0.970129	A	G	-0.0642385
1082	0.12214	0.754251	0.324773	0.325589	9	BCDIN3D	0.940738	D	G	0.17138
1083	-0.332614	0.381806	-0.914806	0.933143	9	BCHE	0.839471	A	G	-0.381961
1084	0.691686	0.0390059	2.25202	2.53397	9	BCKDHB	0.484322	X	G	-0.0183863
1085	-0.123509	0.751567	-0.32845	0.329294	9	BCKDK	0.939494	X	G	-0.00807263
1086	-0.105092	0.787869	-0.279077	0.279595	9	BCL10	0.948226	B	G	0.0714061
1087	0.0440529	0.910401	0.116628	0.116666	9	BCL11A	0.98123	A	G	-0.270478
1088	0.385521	0.305507	1.07557	1.10544	9	BCL11B	0.801413	A	G	-0.207411
1089	0.0287288	0.941514	0.0760301	0.0760406	9	BCL2	0.987804	A	G	-0.380935
1090	0.511937	0.15886	1.49578	1.57674	9	BCL2A1	0.699613	C	G	0.0526091
1091	-0.660659	0.0527337	-2.10068	2.32845	9	BCL2L1	0.529605	D	G	0.124998
1092	0.218182	0.57278	0.586686	0.591506	9	BCL2L10	0.884266	B	G	0.44818
1093	0.699497	0.0359603	2.29205	2.5897	9	BCL2L11	0.472418	A	G	0.146833
1094	0.218884	0.571515	0.588635	0.593503	9	BCL2L13	0.884266	X	G	-0.187009
1095	-0.167253	0.667119	-0.446706	0.448831	9	BCL2L14	0.916692	X	G	0.070545
1096	0.111194	0.775799	0.295412	0.296026	9	BCL6	0.946388	X	G	0.108909
1097	0.131452	0.736034	0.349814	0.350834	9	BCL7A	0.935002	D	G	0.094414
1098	-0.463875	0.208477	-1.32879	1.38537	9	BCL7B	0.742256	D	G	-0.181277
1099	0.794758	0.0104828	2.86857	3.46455	9	BCL9	0.305487	C	G	0.366687
1100	0.23244	0.547283	0.626426	0.632295	9	BCL9L	0.878953	X	G	0.328936
1101	0.428455	0.249899	1.21176	1.25457	9	BCLAF1	0.772924	A	G	0.121238
1102	0.666668	0.0498666	2.12909	2.36644	9	BCLAF3	0.521294	A	G	0.300405
1103	0.70166	0.0351451	2.30329	2.60545	9	BCO1	0.469506	C	G	0.0691873
1104	0.161393	0.678266	0.430773	0.432679	9	BCO2	0.918449	X	G	-0.149534
1105	-0.162353	0.676437	-0.43338	0.435321	9	BCOR	0.918449	X	G	-0.0810065
1106	0.705308	0.0337974	2.3224	2.63234	9	BCORL1	0.465238	D	G	0.155984
1107	-0.414968	0.26674	-1.16836	1.2067	9	BCR	0.78223	A	G	-0.289971
1108	-0.647509	0.0593682	-2.03987	2.24805	9	BDH1	0.549654	B	G	-0.274717
1109	0.509643	0.161055	1.48757	1.56719	9	BDH2	0.699613	X	G	0.297076
1110	0.109957	0.778242	0.2921	0.292694	9	BDKRB1	0.946635	A	G	-0.0344358
1111	-0.238166	0.537165	-0.642466	0.648799	9	BDKRB2	0.876415	X	G	-0.0891366
1112	-0.512472	0.15835	-1.4977	1.57898	9	BDNF	0.699613	B	G	0.156386
1113	0.356472	0.346371	0.986438	1.00945	9	BDP1	0.820682	E	G	0.132001
1114	-0.22073	0.568192	-0.593769	0.598766	9	BEAN1	0.882247	A	G	-0.228595
1115	-0.397322	0.289645	-1.11244	1.14551	9	BECN1	0.795522	A	G	-0.0607406
1116	0.327632	0.389411	0.900014	0.917472	9	BEGAIN	0.845074	A	G	-0.0249661
1117	-0.321996	0.398099	-0.883345	0.899848	9	BEND2	0.849583	A	G	-0.0721152
1118	0.248749	0.518659	0.672231	0.679487	9	BEND3	0.871191	A	G	-0.106989
1119	0.296514	0.438471	0.808788	0.821444	9	BEND4	0.864883	C	G	-0.190885
1120	-0.241826	0.530737	-0.652741	0.659382	9	BEND5	0.87447	X	G	-0.123465
1121	0.0238439	0.951449	0.063097	0.0631029	9	BEND6	0.989145	B	G	-0.323078
1122	0.727302	0.0263818	2.44196	2.80375	9	BEND7	0.427395	B	G	-0.315899
1123	-0.344843	0.363437	-0.951355	0.971989	9	BEST3	0.830252	B	G	-0.128982
1124	-0.2656	0.48973	-0.719973	0.728892	9	BET1	0.870586	X	G	-0.0248405
1125	-0.0824084	0.833066	-0.218528	0.218776	9	BET1L	0.960756	D	G	0.0523959
1126	-0.167385	0.666867	-0.447067	0.449198	9	BFAR	0.916692	A	G	-0.302807
1127	0.403768	0.281163	1.13276	1.16769	9	BFSP1	0.791752	A	G	0.072393
1128	-0.57351	0.106414	-1.72698	1.85226	9	BFSP2	0.654143	X	G	-0.117834
1129	0.127637	0.743484	0.339549	0.340481	9	BGLAP	0.936758	X	G	0.0564953
1130	0.722557	0.0278808	2.41551	2.76534	9	BHLHA15	0.435033	G	G	0.355145
1131	NA	NA	NA	NA	9	BHLHA9	NA	X	G	0.045493
1132	-0.72731	0.0263793	-2.44201	2.80381	9	BHLHE22	0.427395	B	G	-0.00305736
1133	-0.483006	0.187813	-1.39404	1.45944	9	BHLHE23	0.718843	A	G	0.136414
1134	-0.224151	0.562052	-0.603291	0.608533	9	BHLHE40	0.880524	A	G	0.149063
1135	-0.0826954	0.832491	-0.219292	0.219543	9	BHLHE41	0.960756	A	G	0.386219
1136	0.464507	0.207775	1.33093	1.38777	9	BICC1	0.741878	X	G	-0.047577
1137	0.921395	0.000414911	4.2284	6.27278	9	BICD1	0.0909682	A	G	0.536756
1138	0.523259	0.148283	1.5367	1.62456	9	BICD2	0.699613	A	G	-0.200218
1139	0.00946754	0.980714	0.0250495	0.0250499	9	BICDL1	0.995213	X	G	-0.127689
1140	0.34628	0.361305	0.955675	0.976593	9	BICRAL	0.830044	A	G	-0.0268322
1141	0.224878	0.560752	0.605315	0.61061	9	BID	0.880524	A	G	0.0702948
1142	-0.415659	0.265862	-1.17057	1.20913	9	BIN1	0.781754	A	G	0.0529902
1143	0.503068	0.167441	1.46417	1.54006	9	BIN2	0.699613	C	G	0.122884
1144	-0.120798	0.756884	-0.321171	0.32196	9	BIN3	0.940929	B	G	-0.0864734
1145	0.0556928	0.886836	0.147502	0.147578	9	BIRC2	0.975055	B	G	-0.169064
1146	0.296242	0.438911	0.808	0.820619	9	BIRC5	0.864883	X	G	0.526488
1147	0.357838	0.344392	0.990582	1.01389	9	BIRC6	0.819576	A	G	-0.0136583
1148	0.555959	0.120102	1.6588	1.76963	9	BIRC7	0.676578	F	G	0.258036
1149	0.318495	0.403542	0.873021	0.88895	9	BIVM	0.850563	X	G	0.173833
1150	-0.10582	0.786427	-0.281025	0.281554	9	BLCAP	0.947732	D	G	-0.102969
1151	-0.256418	0.505411	-0.693903	0.701886	9	BLK	0.870586	F	G	-0.0794349
1152	-0.131578	0.735789	-0.350152	0.351175	9	BLM	0.934886	A	G	-0.165404
1153	0.521176	0.150197	1.52912	1.61568	9	BLMH	0.699613	A	G	0.229237
1154	-0.235725	0.541469	-0.635622	0.641754	9	BLNK	0.877258	X	G	-0.026881
1155	-0.0191103	0.961081	-0.0505673	0.0505703	9	BLOC1S2	0.991337	B	G	0.210162
1156	-0.211683	0.584544	-0.568657	0.573046	9	BLOC1S3	0.890625	X	G	-0.0392926
1157	-0.0393502	0.91994	-0.104165	0.104192	9	BLOC1S4	0.982486	B	G	0.110467
1158	0.183743	0.636053	0.491724	0.49456	9	BLOC1S5	0.906532	B	G	-0.00617638
1159	-0.290994	0.447446	-0.792804	0.804721	9	BLOC1S6	0.868052	B	G	0.11899
1160	0.131056	0.736807	0.348747	0.349758	9	BLVRA	0.935077	X	G	-0.202008
1161	-0.217468	0.574068	-0.584702	0.589473	9	BLZF1	0.88439	B	G	0.446378
1162	0.8056	0.00876809	2.94834	3.59758	9	BMERB1	0.286348	A	G	0.183055
1163	0.209322	0.588838	0.562121	0.566359	9	BMF	0.892044	X	G	0.0518598
1164	0.398655	0.287879	1.11664	1.15008	9	BMI1	0.795045	A	G	-0.100925
1165	0.539162	0.13414	1.59532	1.69376	9	BMP1	0.694653	X	G	-0.163818
1166	0.331573	0.383389	0.911711	0.929863	9	BMP10	0.840463	X	G	0.253762
1167	-0.604256	0.0848101	-1.85156	2.00644	9	BMP15	0.615492	B	G	0.251569
1168	0.940277	0.000161635	4.60476	7.30808	9	BMP2	0.0623288	G	G	0.886469
1169	0.0583474	0.881472	0.154548	0.154636	9	BMP2K	0.973632	X	G	-0.24182
1170	0.372587	0.323387	1.03561	1.06226	9	BMP3	0.808104	X	G	0.0691518
1171	-0.0806683	0.836552	-0.213893	0.214126	9	BMP4	0.960836	X	G	-0.201057
1172	0.0638195	0.870428	0.16908	0.169195	9	BMP5	0.970382	X	G	0.0787956
1173	0.0405082	0.91759	0.107233	0.107263	9	BMP6	0.98244	X	G	-0.0635424
1174	0.0683667	0.861266	0.181164	0.181305	9	BMP7	0.968001	X	G	-0.0788339
1175	0.692845	0.0385438	2.2579	2.54213	9	BMPER	0.482146	I	G	-0.188656
1176	0.434109	0.243014	1.23014	1.27494	9	BMPR1A	0.768476	B	G	0.504309
1177	0.546161	0.128179	1.62156	1.72501	9	BMPR1B	0.690259	X	G	-0.0317713
1178	-0.431992	0.24558	-1.22324	1.26729	9	BMPR2	0.771096	C	G	-0.160394
1179	0.127136	0.744463	0.338202	0.339123	9	BMS1	0.937063	X	G	-0.0429661
1180	0.44695	0.22776	1.2723	1.3219	9	BMT2	0.758559	A	G	0.283544
1181	0.240883	0.53239	0.650091	0.656652	9	BNC1	0.875136	X	G	-0.00202956
1182	0.479423	0.191591	1.3817	1.44537	9	BNC2	0.723416	X	G	0.0352394
1183	0.495594	0.174875	1.43783	1.50966	9	BNIP1	0.703949	A	G	-0.0615559
1184	0.702761	0.0347347	2.30904	2.61353	9	BNIP2	0.468733	X	G	-0.137534
1185	-0.502307	0.16819	-1.46148	1.53694	9	BNIP3	0.699613	X	G	-0.44591
1186	0.353284	0.35101	0.976787	0.999128	9	BNIP3L	0.823464	B	G	0.321676
1187	0.689442	0.0399109	2.24066	2.51828	9	BOC	0.486797	A	G	0.273517
1188	-0.255896	0.506309	-0.692424	0.700355	9	BOD1	0.870586	A	G	-0.0683018
1189	0.25024	0.516073	0.676437	0.68383	9	BOD1L1	0.870586	A	G	-0.0985422
1190	-0.236679	0.539785	-0.638296	0.644506	9	BOK	0.876987	B	G	0.12462
1191	0.0232586	0.952639	0.0615477	0.0615532	9	BOLA1	0.989258	E	G	-0.130235
1192	-0.327032	0.390333	-0.898234	0.915589	9	BOLA3	0.84583	X	G	-0.176253
1193	0.108754	0.780621	0.288878	0.289452	9	BOLL	0.946945	X	G	-0.133818
1194	-0.076777	0.844358	-0.203533	0.203734	9	BOP1	0.963186	D	G	0.0538223
1195	0.0891873	0.819509	0.236596	0.236912	9	BORA	0.958107	A	G	-0.0900715
1196	-0.0221762	0.954842	-0.0586822	0.058687	9	BORCS5	0.989943	B	G	0.428842
1197	-0.114532	0.769214	-0.304357	0.305029	9	BORCS6	0.944305	B	G	0.0182907
1198	-0.197259	0.610951	-0.52883	0.532358	9	BORCS7	0.898283	X	G	0.176635
1199	-0.366689	0.331707	-1.01754	1.04281	9	BORCS8	0.812739	B	G	-0.186544
1200	-0.382299	0.309913	-1.06558	1.09462	9	BPGM	0.805288	B	G	-0.100438
1201	0.588972	0.0951755	1.78877	1.92819	9	BPHL	0.634461	X	G	-0.0228571
1202	-0.383081	0.30884	-1.068	1.09724	9	BPIFB2	0.805144	X	G	0.0158249
1203	-0.0491775	0.900018	-0.130216	0.130269	9	BPIFC	0.97896	X	G	0.196735
1204	0.267848	0.485922	0.726376	0.735536	9	BPNT1	0.870586	A	G	-0.0606373
1205	-0.112625	0.772974	-0.299247	0.299886	9	BPNT2	0.946025	A	G	-0.233656
1206	0.234673	0.543328	0.632676	0.638723	9	BPTF	0.877573	A	G	-0.0992578
1207	-0.174569	0.65328	-0.466644	0.469068	9	BRAF	0.91223	A	G	-0.226374
1208	0.110946	0.776288	0.294749	0.295359	9	BRAP	0.946388	D	G	0.163157
1209	-0.332252	0.382356	-0.913729	0.932001	9	BRAT1	0.840049	A	G	-0.182105
1210	0.446035	0.228829	1.26927	1.31852	9	BRCA1	0.758559	G	G	0.447336
1211	0.315822	0.40772	0.865158	0.880659	9	BRCA2	0.853078	A	G	-0.0434666
1212	-0.0496675	0.899026	-0.131516	0.13157	9	BRCC3	0.978749	X	G	0.268492
1213	0.605815	0.083794	1.85807	2.01461	9	BRD1	0.614039	A	G	0.115047
1214	0.593736	0.0918658	1.80815	1.95223	9	BRD3	0.628653	A	G	0.0833
1215	-0.430486	0.247414	-1.21835	1.26187	9	BRD3OS	0.771551	B	G	0.12231
1216	-0.0264946	0.946057	-0.0701145	0.0701227	9	BRD7	0.988829	A	G	-0.102431
1217	-0.0382298	0.922214	-0.101196	0.101221	9	BRD8	0.982916	D	G	-0.11094
1218	0.286145	0.455393	0.778811	0.790107	9	BRD9	0.870543	A	G	-0.0968793
1219	-0.364187	0.33527	-1.0099	1.0346	9	BRDT	0.815034	F	G	-0.0375599
1220	0.208172	0.590934	0.55894	0.563106	9	BRF1	0.892066	X	G	0.172246
1221	-0.106693	0.784698	-0.283361	0.283903	9	BRF2	0.947732	X	G	-0.0911563
1222	-0.466765	0.205278	-1.33856	1.39639	9	BRI3	0.740001	D	G	0.309853
1223	0.0391742	0.920297	0.103698	0.103725	9	BRI3BP	0.982572	X	G	0.332871
1224	-0.268306	0.485148	-0.727682	0.736891	9	BRICD5	0.870586	X	G	-0.0884987
1225	0.833334	0.0052656	3.17212	3.98863	9	BRINP1	0.235158	C	G	-0.0757859
1226	-0.560737	0.116278	-1.67716	1.79176	9	BRINP2	0.669807	A	G	-0.209208
1227	0.107002	0.784086	0.284189	0.284735	9	BRIP1	0.947732	A	G	0.0671658
1228	-0.257603	0.503376	-0.697259	0.705358	9	BRIX1	0.870586	E	G	0.144663
1229	-0.383467	0.308312	-1.0692	1.09854	9	BRK1	0.805089	X	G	-0.0560613
1230	-0.24098	0.532219	-0.650365	0.656934	9	BRMS1L	0.875136	B	G	0.0332427
1231	0.711132	0.0317163	2.35332	2.67614	9	BROX	0.456879	B	G	0.602752
1232	0.0305799	0.937752	0.080932	0.0809446	9	BRPF1	0.987149	D	G	-0.0466624
1233	-0.427528	0.251038	-1.20876	1.25125	9	BRPF3	0.7736	B	G	0.0794398
1234	0.590288	0.0942539	1.79411	1.9348	9	BRS3	0.633336	B	G	0.564749
1235	0.248814	0.518547	0.672413	0.679675	9	BRSK2	0.871191	D	G	-0.242323
1236	0.36714	0.331069	1.01891	1.04429	9	BRWD1	0.812739	C	G	-0.110961
1237	0.255877	0.506341	0.692371	0.7003	9	BRWD3	0.870586	X	G	-0.0263706
1238	0.562612	0.114796	1.68441	1.80053	9	BSCL2	0.666796	B	G	0.088029
1239	-0.271866	0.479148	-0.73784	0.747441	9	BSDC1	0.870586	B	G	0.0223016
1240	0.108313	0.781492	0.287699	0.288266	9	BSG	0.947314	D	G	-0.145789
1241	-0.148603	0.702785	-0.396099	0.397581	9	BSN	0.926999	D	G	0.258827
1242	0.146293	0.707238	0.389852	0.391264	9	BSND	0.927519	X	G	-0.0892705
1243	0.716001	0.0300423	2.37956	2.7136	9	BSPRY	0.448888	X	G	0.527217
1244	0.457667	0.215441	1.30794	1.36187	9	BST1	0.745388	A	G	-0.118359
1245	-0.376533	0.317877	-1.04775	1.07536	9	BSX	0.806129	X	G	0.0110774
1246	0.643288	0.0616045	2.02072	2.22299	9	BTAF1	0.555964	A	G	-0.160684
1247	-0.670374	0.0481492	-2.14682	2.39028	9	BTBD1	0.514653	B	G	0.00967413
1248	-0.651801	0.0571478	-2.05952	2.2739	9	BTBD10	0.541509	A	G	-0.15278
1249	-0.0127419	0.974046	-0.0337136	0.0337145	9	BTBD11	0.993316	F	G	-0.10237
1250	0.0770378	0.843834	0.204228	0.20443	9	BTBD17	0.962982	A	G	-0.238618
1251	0.418085	0.262795	1.17834	1.21768	9	BTBD18	0.780559	F	G	0.145037
1252	0.619614	0.0751267	1.91653	2.08859	9	BTBD19	0.591921	C	G	0.236301
1253	-0.212471	0.583112	-0.570842	0.575281	9	BTBD2	0.889699	D	G	-0.0135561
1254	0.463363	0.209047	1.32707	1.38342	9	BTBD3	0.743125	B	G	0.418509
1255	0.639474	0.0636697	2.00358	2.20065	9	BTBD6	0.56191	A	G	-0.0144406
1256	0.461396	0.211242	1.32045	1.37596	9	BTBD7	0.74369	A	G	-0.0535919
1257	-0.0265227	0.946	-0.070189	0.0701973	9	BTBD8	0.988829	F	G	0.103658
1258	0.521966	0.149469	1.53199	1.61905	9	BTBD9	0.699613	A	G	-0.208648
1259	0.142562	0.714448	0.379772	0.381077	9	BTC	0.928639	F	G	-0.0240324
1260	0.620142	0.0748067	1.91879	2.09148	9	BTD	0.590483	C	G	-0.11115
1261	-0.0553923	0.887444	-0.146704	0.14678	9	BTF3	0.975055	E	G	0.190368
1262	-0.221263	0.567234	-0.595251	0.600285	9	BTF3L4	0.882129	B	G	0.0222805
1263	-0.289821	0.449363	-0.789414	0.801179	9	BTG1	0.869179	A	G	-0.211815
1264	0.0745139	0.848902	0.197511	0.197695	9	BTG4	0.964456	C	G	-0.112758
1265	0.318251	0.403923	0.872302	0.888192	9	BTK	0.850923	E	G	0.217576
1266	0.102221	0.793561	0.2714	0.271876	9	BTRC	0.948591	A	G	-0.129097
1267	0.426281	0.252574	1.20472	1.24679	9	BUB1	0.774197	X	G	0.128367
1268	0.176715	0.649236	0.472504	0.47502	9	BUB1B	0.910371	A	G	-0.172557
1269	-0.00231987	0.995274	-0.00613781	0.00613781	9	BUB3	0.999276	B	G	0.193637
1270	-0.40012	0.285947	-1.12125	1.15511	9	BUD13	0.794525	A	G	-0.188846
1271	-0.262091	0.4957	-0.709992	0.718545	9	BUD23	0.870586	D	G	-0.0316852
1272	-0.395655	0.291859	-1.10721	1.13981	9	BUD31	0.795522	H	G	-0.127891
1273	0.289391	0.450066	0.788173	0.799883	9	BVES	0.869243	A	G	-0.14327
1274	-0.297087	0.437544	-0.810451	0.823185	9	BYSL	0.864532	D	G	0.159644
1275	-0.411189	0.271562	-1.1563	1.19346	9	BZW1	0.785085	B	G	0.0334464
1276	-0.522046	0.149396	-1.53228	1.61939	9	BZW2	0.699613	A	G	-0.171175
1277	-0.376896	0.317373	-1.04887	1.07656	9	C10H15orf40	0.806129	A	G	0.0366831
1278	0.37107	0.325516	1.03095	1.05724	9	C10H15orf48	0.809079	A	G	0.0585811
1279	-0.417961	0.262952	-1.17794	1.21724	9	C10H15orf61	0.780559	A	G	-0.313439
1280	0.0793886	0.839118	0.210485	0.210707	9	C11H16orf70	0.9615	B	G	0.0187639
1281	-0.106379	0.785319	-0.282522	0.283059	9	C11H16orf87	0.947732	B	G	0.1426
1282	-0.0451549	0.908167	-0.11955	0.119591	9	C12H3orf14	0.980567	B	G	0.123719
1283	0.0249224	0.949255	0.0659521	0.0659589	9	C12H3orf18	0.989145	A	G	-0.184768
1284	-0.212113	0.583761	-0.569851	0.574267	9	C13H5orf15	0.890091	B	G	0.023118
1285	0.612933	0.0792496	1.88803	2.0524	9	C13H5orf24	0.601481	B	G	0.311018
1286	-0.121028	0.756433	-0.321788	0.322582	9	C13H5orf47	0.940862	C	G	-0.0217539
1287	0.230435	0.550841	0.620823	0.626536	9	C14H16orf71	0.879946	X	G	0.0926468
1288	0.100623	0.796734	0.267127	0.267581	9	C14H16orf72	0.949565	X	G	-0.166457
1289	0.621187	0.0741756	1.92329	2.09721	9	C14H16orf91	0.589718	X	G	-0.0790291
1290	-0.244786	0.525561	-0.661064	0.667963	9	C14H7orf26	0.873612	D	G	0.0898423
1291	0.397374	0.289576	1.11261	1.14569	9	C14H7orf50	0.795522	X	G	0.29978
1292	0.247681	0.520516	0.669218	0.676377	9	C15H12orf43	0.871743	A	G	-0.0486167
1293	-0.296255	0.438891	-0.808037	0.820657	9	C15H12orf49	0.864883	X	G	-0.0232095
1294	-0.206425	0.594122	-0.554111	0.558171	9	C15H12orf65	0.893295	X	G	-0.00167093
1295	0.530046	0.142146	1.56154	1.6538	9	C15H22orf15	0.699613	C	G	0.149048
1296	0.289422	0.450015	0.788264	0.799977	9	C15H22orf39	0.869243	X	G	0.057448
1297	0.527169	0.144728	1.55098	1.64135	9	C17H9orf116	0.699613	X	G	0.142815
1298	-0.204397	0.597832	-0.548509	0.552446	9	C17H9orf16	0.894273	X	G	-0.00236137
1299	-0.485788	0.184908	-1.40366	1.47044	9	C17H9orf78	0.716555	B	G	0.00861979
1300	0.32496	0.39352	0.8921	0.909101	9	C18H17orf58	0.847569	B	G	0.541669
1301	-0.704616	0.0340502	-2.31876	2.62721	9	C18H17orf67	0.466356	B	G	0.0154008
1302	0.343286	0.365752	0.946682	0.967013	9	C18H17orf75	0.83162	A	G	-0.32922
1303	0.130877	0.737156	0.348266	0.349272	9	C18H17orf80	0.935077	B	G	-0.0551597
1304	0.677686	0.0448724	2.18227	2.43828	9	C1AH12orf29	0.511167	A	G	0.284324
1305	0.194315	0.616389	0.520731	0.5241	9	C1AH12orf4	0.899846	A	G	0.125845
1306	-0.0277282	0.943549	-0.0733807	0.0733901	9	C1AH12orf40	0.988198	X	G	0.123235
1307	0.283982	0.458959	0.772581	0.783607	9	C1AH12orf45	0.870586	C	G	0.199666
1308	0.374523	0.320677	1.04156	1.06868	9	C1AH12orf50	0.806331	X	G	0.135519
1309	0.0614237	0.875261	0.162717	0.162819	9	C1AH12orf66	0.971372	B	G	0.0225362
1310	-0.162059	0.676997	-0.432581	0.434511	9	C1AH12orf73	0.918449	B	G	0.0164478
1311	0.654173	0.0559437	2.07046	2.28835	9	C1AH12orf75	0.536481	C	G	0.382155
1312	0.336579	0.375803	0.92662	0.94568	9	C1AH22orf23	0.836502	A	G	-0.0878915
1313	0.427659	0.250877	1.20918	1.25172	9	C1D	0.773342	X	G	0.070038
1314	-0.456847	0.21637	-1.3052	1.35879	9	C1GALT1	0.74554	A	G	-0.0949374
1315	0.100574	0.796832	0.266996	0.267449	9	C1GALT1C1	0.949607	X	G	0.0484153
1316	0.43962	0.236402	1.24816	1.29498	9	C1H11orf54	0.763022	X	G	0.301686
1317	-0.703209	0.0345685	-2.31138	2.61682	9	C1H11orf87	0.467725	X	G	-0.365243
1318	0.0772745	0.843359	0.204857	0.205062	9	C1H11orf97	0.962912	X	G	0.0212391
1319	-0.221487	0.56683	-0.595875	0.600926	9	C1H12orf57	0.881844	X	G	-0.0779579
1320	0.430878	0.246936	1.21962	1.26328	9	C1H13orf42	0.771096	X	G	0.178134
1321	0.141434	0.716632	0.376726	0.378	9	C1H21orf91	0.929306	C	G	0.229628
1322	-0.402821	0.282401	-1.12977	1.16441	9	C1H2orf49	0.792209	A	G	-0.261505
1323	0.223198	0.563761	0.600636	0.605809	9	C1H3orf38	0.880524	B	G	0.0436301
1324	-0.16104	0.678939	-0.429814	0.431708	9	C1H3orf52	0.918449	C	G	0.314944
1325	0.0528405	0.892604	0.139933	0.139998	9	C1H3orf85	0.976252	F	G	-0.0346749
1326	0.734047	0.0243435	2.48025	2.85983	9	C1HXorf21	0.41622	A	G	0.0803821
1327	0.713042	0.0310527	2.36357	2.69073	9	C1QB	0.455167	C	G	0.105881
1328	0.776499	0.0138571	2.7423	3.26038	9	C1QC	0.339951	C	G	0.131182
1329	0.0908082	0.816273	0.24092	0.241253	9	C1QL1	0.956852	B	G	-0.0614182
1330	-0.751545	0.0195463	-2.58356	3.01418	9	C1QL2	0.382383	C	G	-0.23337
1331	-0.243376	0.528024	-0.657096	0.663872	9	C1QL3	0.873825	C	G	-0.087337
1332	0.348843	0.357521	0.963388	0.984818	9	C1QTNF1	0.828993	X	G	-0.0143502
1333	-0.40188	0.283634	-1.1268	1.16117	9	C1QTNF12	0.792685	B	G	0.0041081
1334	-0.123783	0.751029	-0.329187	0.330037	9	C1QTNF2	0.939417	F	G	-0.0394675
1335	0.402655	0.282618	1.12924	1.16384	9	C1QTNF3	0.792227	A	G	-0.192626
1336	-0.428675	0.24963	-1.21247	1.25536	9	C1QTNF4	0.772704	C	G	-0.270993
1337	0.761948	0.017016	2.64798	3.11273	9	C1QTNF5	0.361909	X	G	-0.0616135
1338	-0.0184967	0.96233	-0.0489433	0.0489461	9	C1QTNF6	0.991532	X	G	-0.175001
1339	-0.312977	0.412187	-0.856806	0.871861	9	C1QTNF7	0.855007	B	G	0.018763
1340	-0.446279	0.228544	-1.27008	1.31942	9	C1QTNF8	0.758559	X	G	-0.0817676
1341	0.571513	0.107922	1.71912	1.84267	9	C1R	0.656145	C	G	0.148418
1342	0.633111	0.0672118	1.97529	2.16398	9	C1S	0.570476	C	G	0.264618
1343	0.178627	0.645642	0.477726	0.480327	9	C20H20orf204	0.909532	X	G	0.0259608
1344	0.201425	0.603282	0.540308	0.544071	9	C20H20orf85	0.896377	X	G	-0.0969775
1345	0.484606	0.186139	1.39957	1.46576	9	C21H1orf159	0.717024	X	G	0.331036
1346	-0.0789972	0.839903	-0.209443	0.209662	9	C21H1orf167	0.96156	X	G	0.0851373
1347	-0.460997	0.211689	-1.31911	1.37444	9	C21H1orf174	0.74369	B	G	-0.0858064
1348	0.340095	0.370517	0.937125	0.956843	9	C21H1orf50	0.834239	X	G	0.0774716
1349	-0.353167	0.351181	-0.976434	0.998751	9	C22H2orf42	0.823464	D	G	-0.133911
1350	-0.449167	0.225181	-1.27963	1.33011	9	C22H2orf68	0.756488	B	G	-0.116824
1351	-0.204716	0.597248	-0.54939	0.553346	9	C22H8orf58	0.894199	X	G	-0.0885422
1352	-0.209126	0.589195	-0.561579	0.565805	9	C23H1orf109	0.892044	X	G	0.0153037
1353	-0.328743	0.387709	-0.903309	0.920961	9	C23H1orf216	0.843847	D	G	0.0668114
1354	0.669493	0.048554	2.14259	2.38458	9	C23H1orf232	0.516227	X	G	0.184118
1355	0.430407	0.24751	1.21809	1.26158	9	C24H11orf52	0.771551	C	G	0.0746929
1356	NA	NA	NA	NA	9	C24H11orf53	NA	X	G	-0.035565
1357	-0.367026	0.331229	-1.01857	1.04392	9	C25H1orf189	0.812739	X	G	-0.0977673
1358	-0.495977	0.17449	-1.43917	1.5112	9	C25H1orf43	0.703949	D	G	-0.303207
1359	0.808332	0.00836828	2.96905	3.63266	9	C26H1orf116	0.279668	X	G	0.241152
1360	0.0283852	0.942213	0.0751203	0.0751304	9	C26H1orf162	0.987988	A	G	-0.243714
1361	-0.087021	0.823837	-0.23082	0.231113	9	C26H1orf74	0.958869	B	G	0.165786
1362	-0.262359	0.495242	-0.710755	0.719335	9	C26H6orf132	0.870586	X	G	-0.0518374
1363	0.613701	0.0787687	1.89128	2.05652	9	C26H6orf89	0.601016	C	G	-0.139295
1364	0.402303	0.28308	1.12813	1.16263	9	C27H17orf113	0.792559	A	G	0.161431
1365	-0.281816	0.462541	-0.766351	0.777112	9	C28H19orf25	0.870586	D	G	-0.0593222
1366	-0.359699	0.341706	-0.996231	1.01994	9	C28H19orf44	0.817911	X	G	0.0341625
1367	0.443025	0.232366	1.25935	1.30744	9	C2CD2	0.761004	X	G	-0.110123
1368	-0.224983	0.560564	-0.605608	0.61091	9	C2CD2L	0.880524	B	G	0.0518626
1369	0.441708	0.233922	1.25502	1.30261	9	C2CD3	0.761004	A	G	-0.133009
1370	-0.563292	0.114262	-1.68704	1.80371	9	C2CD4C	0.666793	B	G	0.115959
1371	0.197466	0.610569	0.5294	0.53294	9	C2CD5	0.898148	X	G	0.0208835
1372	-0.0300685	0.938791	-0.0795777	0.0795897	9	C2H18orf21	0.987527	X	G	0.118766
1373	-0.146891	0.706085	-0.391468	0.392898	9	C2H18orf63	0.927273	X	G	0.0340131
1374	0.214789	0.578911	0.577266	0.581857	9	C2H1orf35	0.887419	D	G	0.0803362
1375	0.0183276	0.962674	0.0484956	0.0484983	9	C2H5orf22	0.991532	A	G	0.23905
1376	-0.204148	0.598288	-0.547821	0.551744	9	C2H5orf49	0.894499	A	G	0.277177
1377	0.390526	0.298727	1.09116	1.12236	9	C2H6orf62	0.798573	X	G	0.099704
1378	0.2137	0.580884	0.574246	0.578766	9	C2H7orf25	0.88828	X	G	0.317365
1379	0.00745188	0.98482	0.0197162	0.0197164	9	C2H7orf31	0.996405	X	G	0.305154
1380	0.254308	0.509043	0.68793	0.695707	9	C2H8orf34	0.870586	F	G	0.467918
1381	-0.0939844	0.80994	-0.249395	0.249765	9	C2H8orf37	0.955624	A	G	-0.124975
1382	0.578328	0.102831	1.74605	1.87559	9	C2H8orf76	0.648582	A	G	-0.106843
1383	-0.250176	0.516184	-0.676256	0.683643	9	C2H8orf88	0.870586	X	G	0.0655698
1384	-0.227047	0.556876	-0.611363	0.616818	9	C2H9orf152	0.879996	X	G	0.0812555
1385	0.720665	0.0284937	2.40506	2.75025	9	C3	0.439559	X	G	0.111876
1386	0.343036	0.366123	0.945935	0.966217	9	C3AR1	0.832275	X	G	-0.0211974
1387	-0.32406	0.394908	-0.889439	0.906287	9	C3H1orf115	0.848327	C	G	-0.245004
1388	-0.0862373	0.825404	-0.228731	0.229016	9	C3H1orf131	0.959765	X	G	0.196441
1389	0.675157	0.0459892	2.16994	2.42152	9	C3H1orf198	0.512896	B	G	0.17443
1390	0.44912	0.225236	1.27948	1.32994	9	C3H2orf50	0.756488	X	G	-0.102711
1391	0.121312	0.755876	0.32255	0.323349	9	C3H6orf120	0.940775	A	G	-0.078415
1392	-0.472638	0.198862	-1.35849	1.41898	9	C3H6orf58	0.73207	X	G	0.135158
1393	0.00279923	0.994297	0.00740609	0.0074061	9	C4AH8orf48	0.999008	A	G	-0.281155
1394	-0.213103	0.581966	-0.572592	0.577072	9	C4AHXorf56	0.888637	X	G	0.0884966
1395	0.199367	0.607066	0.534635	0.538281	9	C4H20orf194	0.89755	A	G	-0.167904
1396	-0.471305	0.200308	-1.35395	1.41383	9	C4H20orf27	0.733232	D	G	-0.051974
1397	0.290308	0.448566	0.790823	0.802651	9	C4H4orf19	0.868628	B	G	0.400938
1398	0.0298346	0.939267	0.0789584	0.0789701	9	C4H4orf46	0.987549	X	G	0.0478536
1399	-0.0189698	0.961367	-0.0501954	0.0501984	9	C4H4orf50	0.991348	K	G	-0.07345
1400	-0.356824	0.345861	-0.987505	1.01059	9	C4H4orf54	0.820547	X	G	-0.00849386
1401	0.311289	0.414848	0.851858	0.866653	9	C5	0.856169	X	G	0.122927
1402	0.31958	0.401852	0.876217	0.892322	9	C5H11orf16	0.850494	C	G	0.069171
1403	-0.223459	0.563292	-0.601364	0.606556	9	C5H11orf24	0.880524	X	G	-0.120151
1404	-0.741651	0.0221733	-2.52441	2.92526	9	C5H11orf49	0.400197	X	G	-0.397588
1405	-0.301003	0.431232	-0.821829	0.835109	9	C5H11orf58	0.861852	A	G	0.0412416
1406	0.251331	0.514185	0.679516	0.687011	9	C5H11orf91	0.870586	X	G	0.196254
1407	0.227484	0.556095	0.612584	0.618071	9	C5H11orf94	0.879946	X	G	-0.0472936
1408	-0.442838	0.232587	-1.25873	1.30675	9	C5H11orf96	0.761004	F	G	-0.204744
1409	-0.737265	0.0234087	-2.49881	2.88723	9	C5H14orf132	0.411386	A	G	-0.300816
1410	-0.107613	0.782876	-0.285825	0.286382	9	C5H14orf180	0.94768	X	G	-0.00806381
1411	0.250825	0.515061	0.678087	0.685535	9	C5H14orf39	0.870586	C	G	0.255493
1412	0.379695	0.313498	1.05751	1.0859	9	C5H15orf41	0.805566	D	G	0.270198
1413	-0.347402	0.359648	-0.959047	0.980188	9	C5H15orf62	0.829114	B	G	0.369466
1414	-0.0640781	0.869907	-0.169767	0.169884	9	C6	0.970382	A	G	-0.0251381
1415	NA	NA	NA	NA	9	C6H10orf105	NA	X	G	-0.04046
1416	0.0608911	0.876336	0.161302	0.161402	9	C6H10orf143	0.971787	X	G	-0.121341
1417	0.506423	0.164165	1.47608	1.55386	9	C6H10orf71	0.699613	F	G	0.280154
1418	-0.201058	0.603955	-0.539297	0.54304	9	C6H10orf88	0.896587	B	G	0.0369722
1419	0.19612	0.613053	0.525695	0.529161	9	C6H10orf90	0.899441	I	G	-0.325716
1420	-0.332542	0.381915	-0.914592	0.932916	9	C6H10orf95	0.839619	A	G	-0.187482
1421	-0.451865	0.222064	-1.28859	1.34014	9	C7	0.753233	X	G	0.0677119
1422	0.466623	0.205434	1.33807	1.39585	9	C7H21orf58	0.740001	A	G	0.0764656
1423	0.38604	0.304801	1.07719	1.10719	9	C7H2orf66	0.801373	X	G	-0.010475
1424	-0.140841	0.717781	-0.375125	0.376383	9	C7H2orf69	0.929597	F	G	0.0973029
1425	-0.0511512	0.896023	-0.135451	0.135511	9	C7H2orf76	0.977353	X	G	0.034402
1426	-0.0850252	0.827828	-0.2255	0.225773	9	C7H2orf88	0.960396	C	G	-0.167496
1427	-0.251142	0.514512	-0.678982	0.686459	9	C8A	0.870586	X	G	-0.0871486
1428	-0.000515041	0.998951	-0.00136267	0.00136267	9	C8B	0.999801	A	G	0.0850334
1429	0.819156	0.00690509	3.05385	3.77858	9	C8G	0.26099	A	G	0.180504
1430	0.174665	0.653097	0.466908	0.469335	9	C8H1orf112	0.912098	A	G	0.272211
1431	0.410341	0.27265	1.1536	1.19051	9	C8H1orf146	0.785814	E	G	-0.0242366
1432	-0.313799	0.410893	-0.859219	0.874402	9	C8H1orf21	0.854249	A	G	-0.0073069
1433	-0.25	0.51649	-0.675759	0.68313	9	C8H1orf210	0.870586	X	G	-0.0989979
1434	-0.59147	0.0934309	-1.79891	1.94076	9	C8H1orf52	0.63319	A	G	-0.104082
1435	0.549161	0.125673	1.6329	1.73856	9	C9	0.686128	X	G	0.0546166
1436	-0.375491	0.319328	-1.04454	1.07189	9	C9H17orf50	0.806331	X	G	0.0203806
1437	0.385601	0.305398	1.07582	1.10572	9	C9H2orf72	0.801413	X	G	0.196153
1438	-0.27188	0.479123	-0.737882	0.747485	9	C9H3orf33	0.870586	B	G	0.0121323
1439	-0.35526	0.348131	-0.982765	1.00552	9	C9H3orf70	0.822058	B	G	0.23936
1440	0.267112	0.487169	0.724277	0.733357	9	C9orf72	0.870586	E	G	0.175783
1441	-0.883611	0.00157772	-3.6829	4.99297	9	CA10	0.146465	B	G	0.0940318
1442	-0.042182	0.914195	-0.111669	0.111703	9	CA12	0.982076	E	G	0.10384
1443	-0.162143	0.676836	-0.43281	0.434743	9	CA14	0.918449	C	G	-0.106164
1444	0.373593	0.321977	1.0387	1.06559	9	CA4	0.807557	X	G	-0.0388852
1445	0.546483	0.127908	1.62278	1.72646	9	CA5A	0.690259	C	G	-0.10288
1446	0.630015	0.0689784	1.96167	2.14641	9	CA6	0.574056	B	G	-0.0662203
1447	0.233167	0.545994	0.628461	0.634387	9	CA7	0.878936	C	G	0.269098
1448	-0.530444	0.14179	-1.56301	1.65553	9	CA8	0.699613	B	G	-0.0500417
1449	0.342422	0.367039	0.944093	0.964256	9	CAAP1	0.832752	E	G	0.280781
1450	0.152257	0.695755	0.405991	0.407586	9	CAB39	0.924649	A	G	-0.0913864
1451	0.110475	0.777219	0.293486	0.294088	9	CAB39L	0.946578	B	G	0.455053
1452	-0.0602336	0.877663	-0.159556	0.159653	9	CABCOCO1	0.972265	A	G	-0.284569
1453	-0.271984	0.478948	-0.738179	0.747794	9	CABIN1	0.870586	B	G	0.23844
1454	-0.729695	0.0256462	-2.45546	2.82344	9	CABLES1	0.422562	B	G	-0.28544
1455	0.676632	0.0453357	2.17712	2.43127	9	CABLES2	0.51193	F	G	0.310301
1456	0.702235	0.0349304	2.30629	2.60966	9	CABP1	0.468751	G	G	0.798413
1457	-0.379331	0.314	-1.05639	1.08468	9	CABP2	0.805981	A	G	0.110733
1458	-0.456612	0.216637	-1.30442	1.35791	9	CABP7	0.74554	X	G	-0.123959
1459	0.54224	0.131498	1.60683	1.70744	9	CACFD1	0.692042	A	G	-0.0320547
1460	-0.426024	0.252892	-1.20389	1.24587	9	CACHD1	0.774197	A	G	-0.370165
1461	-0.0286727	0.941629	-0.0758816	0.075892	9	CACNA1B	0.987804	X	G	0.305796
1462	0.548163	0.126503	1.62913	1.73404	9	CACNA1C	0.68856	A	G	-0.140429
1463	0.236106	0.540796	0.636691	0.642854	9	CACNA1D	0.877003	B	G	0.0948878
1464	-0.362672	0.337436	-1.00528	1.02964	9	CACNA1E	0.815902	B	G	0.0352821
1465	-0.2907	0.447925	-0.791956	0.803836	9	CACNA1G	0.868323	A	G	-0.247183
1466	-0.551163	0.124016	-1.6405	1.74766	9	CACNA1H	0.68412	C	G	-0.205943
1467	-0.0119571	0.975644	-0.0316371	0.0316379	9	CACNA1I	0.993652	C	G	0.0229337
1468	0.0867214	0.824436	0.230021	0.230311	9	CACNA1S	0.959299	X	G	-0.204095
1469	-0.79381	0.0106427	-2.86177	3.45337	9	CACNA2D1	0.307771	B	G	-0.024671
1470	0.546397	0.12798	1.62245	1.72607	9	CACNA2D2	0.690259	C	G	0.121258
1471	0.0294833	0.939981	0.078028	0.0780393	9	CACNA2D3	0.987556	A	G	-0.219988
1472	-0.370152	0.326809	-1.02814	1.05421	9	CACNA2D4	0.809158	X	G	-0.118127
1473	-0.410814	0.272042	-1.15511	1.19216	9	CACNB1	0.785596	A	G	-0.277886
1474	-0.406142	0.278073	-1.14027	1.1759	9	CACNB2	0.789389	B	G	0.0574222
1475	-0.540536	0.132957	-1.60045	1.69986	9	CACNB3	0.69302	D	G	0.14921
1476	-0.363979	0.335566	-1.00926	1.03392	9	CACNB4	0.815034	C	G	-0.241853
1477	-0.201541	0.603069	-0.540628	0.544398	9	CACNG1	0.89634	B	G	0.0400849
1478	-0.375158	0.319792	-1.04352	1.07078	9	CACNG2	0.806331	F	G	-0.0954345
1479	-0.755696	0.0185088	-2.60898	3.05285	9	CACNG3	0.374887	B	G	-0.0242553
1480	-0.1802	0.642688	-0.482028	0.4847	9	CACNG4	0.90838	B	G	0.240207
1481	-0.359679	0.341734	-0.996172	1.01988	9	CACNG5	0.817911	C	G	-0.270458
1482	-0.254503	0.508707	-0.688482	0.696278	9	CACTIN	0.870586	D	G	-0.0366138
1483	0.0894741	0.818937	0.237361	0.237679	9	CACUL1	0.957735	C	G	-0.00814843
1484	-0.275592	0.4729	-0.748497	0.758521	9	CACYBP	0.870586	A	G	-0.0794887
1485	0.0143164	0.97084	0.0378803	0.0378816	9	CAD	0.992772	A	G	-0.00333627
1486	0.130425	0.738038	0.347048	0.348044	9	CADM1	0.935116	F	G	-0.0476416
1487	0.576197	0.104407	1.7376	1.86523	9	CADM2	0.650925	A	G	-0.208351
1488	-0.08545	0.826978	-0.226632	0.226909	9	CADM3	0.96014	A	G	0.237014
1489	-0.0966087	0.804715	-0.256402	0.256804	9	CADPS	0.953165	B	G	0.134195
1490	0.952936	7.11081e-05	4.92847	8.31615	9	CADPS2	0.0403245	B	G	0.485282
1491	-0.478437	0.192638	-1.37832	1.44151	9	CALB1	0.7255	X	G	0.0936899
1492	-0.778284	0.0134991	-2.75424	3.27935	9	CALB2	0.33937	A	G	-0.447122
1493	0.399983	0.286127	1.12082	1.15464	9	CALCB	0.794568	F	G	0.00998074
1494	0.863788	0.00268123	3.46084	4.53576	9	CALCR	0.182822	B	G	0.146349
1495	0.428405	0.249961	1.2116	1.25439	9	CALCRL	0.772924	X	G	-0.141344
1496	0.238475	0.536621	0.643332	0.649691	9	CALD1	0.876415	X	G	-0.167615
1497	NA	NA	NA	NA	9	CALHM1	NA	X	G	0.197868
1498	0.47305	0.198416	1.3599	1.42057	9	CALHM2	0.731927	X	G	-0.0360673
1499	-0.10409	0.789854	-0.276398	0.276901	9	CALHM3	0.948317	X	G	0.0186628
1500	-0.461986	0.210583	-1.32243	1.37819	9	CALHM4	0.743375	X	G	-0.107008
1501	0.566933	0.111427	1.7012	1.82087	9	CALHM5	0.662986	A	G	-0.12572
1502	0.0486247	0.901138	0.12875	0.128801	9	CALHM6	0.979276	X	G	0.473376
1503	-0.492025	0.17849	-1.42534	1.4953	9	CALM1	0.709278	F	G	-0.0823292
1504	-0.269373	0.483346	-0.730725	0.74005	9	CALM2	0.870586	B	G	-0.0705048
1505	-0.217828	0.573418	-0.585703	0.590498	9	CALML4	0.884266	X	G	0.0325482
1506	-0.191194	0.622174	-0.512154	0.515359	9	CALN1	0.901657	A	G	-0.420289
1507	-0.347071	0.360136	-0.958053	0.979128	9	CALR	0.829569	X	G	-0.0309036
1508	-0.539821	0.133572	-1.59778	1.69668	9	CALU	0.69398	D	G	0.114312
1509	0.824065	0.00630304	3.09382	3.8487	9	CAMK1	0.251371	A	G	0.490414
1510	0.0732198	0.851503	0.194069	0.194243	9	CAMK1D	0.965347	B	G	0.424663
1511	0.0199915	0.959287	0.0528996	0.0529031	9	CAMK1G	0.990849	C	G	-0.134173
1512	-0.715408	0.0302431	-2.37635	2.70899	9	CAMK2A	0.450214	B	G	-0.197978
1513	-0.607698	0.0825765	-1.86595	2.02453	9	CAMK2B	0.61078	D	G	-0.122408
1514	-0.227936	0.55529	-0.613844	0.619366	9	CAMK2D	0.879946	B	G	0.358156
1515	-0.0829873	0.831907	-0.22007	0.220324	9	CAMK2G	0.960674	X	G	-0.111479
1516	-0.865008	0.00260132	-3.47362	4.56116	9	CAMK2N1	0.180784	B	G	0.0514086
1517	-0.666174	0.0500985	-2.12674	2.36329	9	CAMK2N2	0.521486	A	G	0.0709329
1518	-0.284098	0.458767	-0.772916	0.783957	9	CAMK4	0.870586	C	G	-0.0979742
1519	-0.225966	0.558805	-0.60835	0.613725	9	CAMKK1	0.880099	B	G	0.14858
1520	-0.102038	0.793925	-0.27091	0.271383	9	CAMKK2	0.948591	A	G	-0.287732
1521	0.158014	0.684719	0.421599	0.423385	9	CAMKMT	0.919932	H	G	0.105415
1522	-0.398504	0.28808	-1.11616	1.14956	9	CAMKV	0.795045	B	G	-0.418707
1523	-0.129321	0.740194	-0.344077	0.345047	9	CAMLG	0.93569	B	G	0.239371
1524	0.350095	0.355679	0.967161	0.988845	9	CAMP	0.827627	X	G	-0.026626
1525	-0.619173	0.0753949	-1.91463	2.08617	9	CAMSAP1	0.592876	A	G	-0.252509
1526	0.508723	0.16194	1.48428	1.56337	9	CAMSAP2	0.699613	X	G	0.268836
1527	0.725715	0.026877	2.43307	2.79081	9	CAMTA1	0.429978	F	G	0.202959
1528	0.642063	0.0622628	2.01521	2.21579	9	CAND1	0.558111	X	G	0.413487
1529	-0.657493	0.0542856	-2.08587	2.30876	9	CANT1	0.531931	D	G	-0.00399464
1530	0.655816	0.0551191	2.07807	2.29842	9	CANX	0.533475	E	G	0.202692
1531	-0.752983	0.0191824	-2.59233	3.02749	9	CAP1	0.378589	D	G	-0.297988
1532	-0.758951	0.0177211	-2.62918	3.08378	9	CAP2	0.368996	C	G	-0.371413
1533	-0.082849	0.832184	-0.219701	0.219954	9	CAPN10	0.960732	B	G	-0.13739
1534	0.312518	0.41291	0.85546	0.870444	9	CAPN11	0.855338	C	G	0.0278284
1535	0.0486824	0.901021	0.128903	0.128954	9	CAPN14	0.979256	X	G	0.139011
1536	-0.409951	0.273151	-1.15236	1.18914	9	CAPN15	0.786129	A	G	-0.182161
1537	0.816042	0.00730657	3.029	3.73542	9	CAPN3	0.269818	X	G	0.303183
1538	-0.361303	0.339399	-1.00111	1.02517	9	CAPN5	0.817592	A	G	-0.122657
1539	0.19713	0.611188	0.528476	0.531997	9	CAPN6	0.898434	L	G	-0.0229895
1540	-0.0470039	0.904421	-0.124452	0.124498	9	CAPN7	0.980016	C	G	-0.135571
1541	-0.227199	0.556604	-0.611787	0.617254	9	CAPN8	0.879996	A	G	-0.205079
1542	0.883615	0.00157753	3.68295	4.99308	9	CAPN9	0.146465	X	G	0.213913
1543	-0.216107	0.576526	-0.580925	0.585604	9	CAPNS2	0.885585	E	G	0.164355
1544	0.784071	0.0123809	2.79352	3.34229	9	CAPRIN1	0.327954	B	G	0.169985
1545	0.583066	0.0993782	1.76497	1.89882	9	CAPRIN2	0.643296	B	G	-0.0801403
1546	0.304313	0.425929	0.83147	0.845224	9	CAPS2	0.860163	K	G	0.0457241
1547	0.950908	8.22542e-05	4.8713	8.12951	9	CAPSL	0.0403245	C	G	0.127212
1548	-0.113803	0.770649	-0.302405	0.303064	9	CAPZA1	0.944733	B	G	0.132321
1549	-0.208255	0.590781	-0.559171	0.563343	9	CAPZA2	0.892044	B	G	0.0300939
1550	-0.0141031	0.971274	-0.0373158	0.037317	9	CAPZB	0.992772	D	G	0.125771
1551	-0.108809	0.780512	-0.289026	0.289601	9	CARD10	0.946928	A	G	-0.12893
1552	0.681274	0.0433184	2.19991	2.46231	9	CARD11	0.502779	C	G	0.0215077
1553	0.883406	0.00158715	3.68042	4.98769	9	CARD19	0.146662	A	G	0.0820181
1554	-0.354868	0.348701	-0.981579	1.00425	9	CARD8	0.82251	X	G	-0.0742458
1555	0.218362	0.572455	0.587186	0.592018	9	CARD9	0.884266	A	G	-0.1967
1556	0.0582412	0.881687	0.154266	0.154354	9	CARF	0.973632	X	G	0.33584
1557	0.510458	0.160273	1.49048	1.57058	9	CARHSP1	0.699613	A	G	-0.230161
1558	-0.0845345	0.82881	-0.224192	0.224461	9	CARM1	0.960406	D	G	0.0242517
1559	0.0632687	0.871539	0.167617	0.167729	9	CARMIL1	0.970382	B	G	0.245437
1560	0.277341	0.469978	0.753509	0.763737	9	CARMIL2	0.870586	A	G	0.439937
1561	-0.07714	0.843629	-0.2045	0.204703	9	CARNMT1	0.962912	E	G	0.0652872
1562	0.387701	0.302544	1.08236	1.1128	9	CARNS1	0.799577	I	G	-0.178597
1563	-0.316538	0.406599	-0.867263	0.882877	9	CARS1	0.851882	X	G	-0.174037
1564	0.486075	0.184611	1.40465	1.47157	9	CARS2	0.716555	X	G	0.0840963
1565	-0.0582372	0.881695	-0.154256	0.154343	9	CARTPT	0.973632	X	G	-0.0736
1566	0.751022	0.0196796	2.58039	3.00937	9	CASC1	0.383494	C	G	0.0532582
1567	-0.233499	0.545405	-0.629391	0.635344	9	CASC3	0.878919	D	G	-0.0250432
1568	0.233492	0.545417	0.629371	0.635324	9	CASD1	0.878919	D	G	-0.1541
1569	0.310421	0.416221	0.849315	0.863977	9	CASK	0.856964	A	G	0.0982647
1570	0.136549	0.726112	0.363544	0.364689	9	CASKIN1	0.932435	D	G	0.327179
1571	0.717681	0.0294784	2.38871	2.72671	9	CASKIN2	0.446451	X	G	-0.112272
1572	0.568663	0.110095	1.70795	1.82907	9	CASP2	0.66136	A	G	0.184618
1573	0.59938	0.0880376	1.83133	1.98111	9	CASP3	0.622383	B	G	0.276222
1574	0.756789	0.0182415	2.61574	3.06318	9	CASP6	0.374007	X	G	-0.0467813
1575	0.789938	0.0113126	2.8343	3.40839	9	CASP7	0.315828	X	G	-0.0399799
1576	0.45452	0.219019	1.29743	1.35006	9	CASP8AP2	0.749066	A	G	-0.0474122
1577	-0.441437	0.234243	-1.25412	1.30162	9	CASP9	0.761004	X	G	0.00413988
1578	-0.0954983	0.806925	-0.253437	0.253825	9	CASQ2	0.95437	X	G	-0.0482695
1579	0.679492	0.0440858	2.19113	2.45033	9	CASR	0.507176	X	G	0.204523
1580	0.244102	0.526754	0.65914	0.66598	9	CASS4	0.873825	C	G	-0.0853042
1581	0.504908	0.165639	1.4707	1.54762	9	CAST	0.699613	E	G	-0.075287
1582	0.168844	0.664102	0.451037	0.453225	9	CASTOR1	0.916004	D	G	0.158321
1583	-0.69505	0.0376745	-2.26916	2.55776	9	CASTOR2	0.478738	A	G	-0.389835
1584	0.199139	0.607485	0.534008	0.537642	9	CASZ1	0.89755	A	G	-0.179161
1585	0.444653	0.230449	1.26471	1.31343	9	CAT	0.760515	A	G	-0.132537
1586	0.0430568	0.912421	0.113988	0.114023	9	CATIP	0.982008	C	G	0.00834635
1587	0.508452	0.162201	1.48331	1.56225	9	CAV1	0.699613	C	G	0.0632905
1588	0.640458	0.0631329	2.00799	2.20639	9	CAV2	0.560655	C	G	0.0993687
1589	-0.240206	0.533579	-0.648189	0.654692	9	CAV3	0.875288	X	G	-0.213859
1590	0.812841	0.00773548	3.00384	3.69207	9	CAVIN1	0.270649	X	G	0.334589
1591	0.350109	0.35566	0.967202	0.988889	9	CAVIN2	0.827627	X	G	-0.0154404
1592	0.446216	0.228618	1.26987	1.31919	9	CAVIN4	0.758559	B	G	0.0433315
1593	-0.763234	0.0167193	-2.65611	3.1253	9	CBARP	0.360102	D	G	-0.249934
1594	-0.139977	0.719456	-0.372792	0.374027	9	CBFA2T2	0.930444	F	G	-0.17035
1595	0.86767	0.00243276	3.50185	4.61769	9	CBFA2T3	0.178645	F	G	0.499284
1596	0.753763	0.0189873	2.5971	3.03474	9	CBFB	0.378589	A	G	-0.0124052
1597	-0.339154	0.371929	-0.934309	0.95385	9	CBL	0.835434	A	G	0.156053
1598	0.300851	0.431476	0.821388	0.834646	9	CBLB	0.862007	C	G	-0.100399
1599	0.538751	0.134495	1.59379	1.69194	9	CBLL1	0.695451	A	G	-0.0781506
1600	-0.0877329	0.822414	-0.232718	0.233018	9	CBLN1	0.958799	X	G	-0.00530918
1601	0.0395207	0.919594	0.104616	0.104644	9	CBLN2	0.982486	F	G	-0.154579
1602	0.323923	0.39512	0.889034	0.905859	9	CBLN4	0.848327	X	G	-0.00385304
1603	-0.535144	0.137635	-1.58037	1.67604	9	CBR4	0.699613	A	G	-0.356288
1604	0.544272	0.129772	1.61445	1.71652	9	CBWD1	0.690259	E	G	0.0329172
1605	0.164233	0.672857	0.438491	0.440501	9	CBX1	0.917966	B	G	0.141497
1606	0.493705	0.176783	1.43121	1.50204	9	CBX2	0.706268	X	G	0.180596
1607	-0.10914	0.779858	-0.289911	0.290492	9	CBX3	0.9469	B	G	0.297835
1608	-0.31939	0.402147	-0.875659	0.891733	9	CBX4	0.850494	D	G	0.149463
1609	0.125492	0.747682	0.333779	0.334665	9	CBX5	0.93811	D	G	0.078997
1610	0.680941	0.0434609	2.19827	2.46007	9	CBX6	0.503735	G	G	0.767318
1611	0.0255939	0.947889	0.0677299	0.0677373	9	CBX7	0.989112	B	G	0.382031
1612	-0.314745	0.409408	-0.861995	0.877326	9	CBX8	0.853796	A	G	0.0319866
1613	-0.0521966	0.893907	-0.138225	0.138288	9	CBY1	0.976677	B	G	0.30923
1614	0.801666	0.00936638	2.91895	3.54819	9	CBY2	0.291186	X	G	-0.00244553
1615	-0.416884	0.264311	-1.17449	1.21344	9	CC2D1A	0.7809	B	G	0.0831719
1616	0.381301	0.311284	1.06248	1.09127	9	CC2D1B	0.805518	B	G	0.414343
1617	0.177515	0.647732	0.474689	0.47724	9	CC2D2A	0.90961	X	G	0.0622886
1618	0.0702987	0.857377	0.1863	0.186454	9	CCAR1	0.966902	A	G	-0.215416
1619	0.695963	0.0373183	2.27383	2.56427	9	CCBE1	0.477498	G	G	0.684044
1620	-0.29723	0.437313	-0.810867	0.823621	9	CCDC102A	0.864525	D	G	0.0907676
1621	0.128776	0.741259	0.342611	0.343569	9	CCDC103	0.936051	A	G	0.0591279
1622	-0.578846	0.10245	-1.74811	1.87811	9	CCDC107	0.647439	X	G	0.00111302
1623	-0.143668	0.71231	-0.382758	0.384094	9	CCDC112	0.927794	E	G	0.0582842
1624	-0.0541377	0.889981	-0.143375	0.143445	9	CCDC115	0.97594	E	G	-0.144294
1625	-0.202443	0.601412	-0.543117	0.54694	9	CCDC117	0.895902	B	G	0.0137734
1626	-0.0860639	0.825751	-0.228268	0.228552	9	CCDC12	0.959779	E	G	-0.0030134
1627	0.5	0.170471	1.45333	1.52753	9	CCDC122	0.699613	X	G	0.279538
1628	-0.41924	0.261342	-1.18204	1.22176	9	CCDC124	0.77885	D	G	-0.062741
1629	0.25509	0.507695	0.690144	0.697998	9	CCDC125	0.870586	E	G	0.0274279
1630	-0.352012	0.352869	-0.972944	0.995022	9	CCDC126	0.825017	B	G	-0.0945128
1631	0.393772	0.294371	1.10131	1.13339	9	CCDC127	0.795578	B	G	0.0124978
1632	0.467389	0.204591	1.34067	1.39878	9	CCDC13	0.739336	X	G	-0.144023
1633	0.458758	0.214208	1.3116	1.36598	9	CCDC134	0.745112	B	G	0.454192
1634	-0.180775	0.641611	-0.4836	0.486297	9	CCDC137	0.908076	X	G	-0.0860181
1635	0.490999	0.179537	1.42176	1.49119	9	CCDC138	0.710495	X	G	0.0793846
1636	-0.0539757	0.890308	-0.142945	0.143015	9	CCDC14	0.97594	A	G	-0.0509574
1637	0.455005	0.218466	1.29905	1.35188	9	CCDC141	0.748622	F	G	0.484036
1638	-0.390963	0.298139	-1.09253	1.12384	9	CCDC142	0.798133	D	G	-0.139852
1639	0.610968	0.0804886	1.87971	2.04189	9	CCDC146	0.605337	G	G	0.686547
1640	0.130706	0.737489	0.347806	0.348809	9	CCDC148	0.935086	A	G	-0.0774588
1641	0.114006	0.77025	0.302948	0.303611	9	CCDC149	0.944733	A	G	-0.0283187
1642	0.3875	0.302817	1.08173	1.11212	9	CCDC15	0.799786	C	G	-0.0277524
1643	0.0294435	0.940062	0.0779227	0.077934	9	CCDC152	0.987589	X	G	0.0812174
1644	0.426114	0.252781	1.20418	1.24619	9	CCDC158	0.774197	X	G	0.0926796
1645	0.680885	0.0434852	2.19799	2.45969	9	CCDC166	0.503735	C	G	0.152503
1646	0.00321757	0.993445	0.00851293	0.00851294	9	CCDC167	0.998875	B	G	0.0914645
1647	0.688692	0.0402163	2.23689	2.51306	9	CCDC17	0.489034	C	G	0.157724
1648	0.344789	0.363516	0.951195	0.971819	9	CCDC170	0.830252	C	G	0.179234
1649	0.605555	0.0839626	1.85698	2.01325	9	CCDC171	0.614039	E	G	0.177433
1650	-0.25	0.51649	-0.675759	0.68313	9	CCDC172	0.870586	X	G	-0.0352141
1651	0.713933	0.030746	2.36837	2.69759	9	CCDC174	0.45299	A	G	-0.109635
1652	-0.301703	0.430109	-0.823866	0.837245	9	CCDC177	0.861566	B	G	0.228428
1653	0.0165875	0.966216	0.0438904	0.0438924	9	CCDC178	0.991832	X	G	0.107618
1654	0.614611	0.0782015	1.89515	2.06142	9	CCDC18	0.599655	X	G	0.226916
1655	0.333722	0.380124	0.918104	0.936641	9	CCDC181	0.83807	A	G	0.335527
1656	-0.20679	0.593456	-0.55512	0.559201	9	CCDC183	0.89319	X	G	-0.142085
1657	0.255681	0.506679	0.691815	0.699725	9	CCDC186	0.870586	D	G	-0.142492
1658	0.765528	0.0161984	2.67071	3.14795	9	CCDC187	0.354432	X	G	0.135499
1659	0.15487	0.69074	0.41307	0.41475	9	CCDC191	0.923187	X	G	-0.0608811
1660	0.117479	0.76341	0.312261	0.312987	9	CCDC198	0.942546	X	G	0.103935
1661	0.0905024	0.816884	0.240104	0.240434	9	CCDC25	0.956989	X	G	0.0580815
1662	0.406589	0.277493	1.14169	1.17745	9	CCDC27	0.788977	L	G	0.0740634
1663	-0.170055	0.661807	-0.454338	0.456574	9	CCDC28A	0.915055	A	G	0.366857
1664	-0.463724	0.208645	-1.32829	1.38479	9	CCDC3	0.742456	A	G	-0.169844
1665	-0.256687	0.504948	-0.694665	0.702674	9	CCDC30	0.870586	A	G	-0.019049
1666	-0.0716206	0.854718	-0.189815	0.189978	9	CCDC32	0.966623	D	G	0.173994
1667	-0.159861	0.68119	-0.426611	0.428462	9	CCDC34	0.918823	C	G	0.15381
1668	0.624921	0.0719486	1.93944	2.11786	9	CCDC39	0.584435	X	G	0.105145
1669	0.353806	0.350249	0.978365	1.00082	9	CCDC40	0.822892	X	G	-0.204606
1670	NA	NA	NA	NA	9	CCDC42	NA	A	G	-0.15821
1671	-0.237185	0.538894	-0.639714	0.645965	9	CCDC43	0.876415	D	G	-0.109793
1672	-0.237792	0.537823	-0.641417	0.647718	9	CCDC47	0.876415	A	G	-0.123358
1673	0.388062	0.302056	1.08348	1.11402	9	CCDC50	0.799509	A	G	-0.0405864
1674	-0.280224	0.465181	-0.761778	0.772347	9	CCDC51	0.870586	A	G	-0.161655
1675	0.712635	0.0311933	2.36138	2.68761	9	CCDC57	0.455896	A	G	0.42016
1676	0.130273	0.738335	0.346639	0.347632	9	CCDC58	0.935216	H	G	0.098573
1677	0.071089	0.855787	0.188402	0.188561	9	CCDC59	0.966886	X	G	0.224149
1678	0.499481	0.170986	1.4515	1.52541	9	CCDC6	0.699613	A	G	0.526609
1679	-0.25	0.51649	-0.675759	0.68313	9	CCDC60	0.870586	X	G	0.0663833
1680	0.103162	0.791695	0.273916	0.274405	9	CCDC61	0.948354	X	G	0.090256
1681	0.195368	0.614443	0.523625	0.52705	9	CCDC62	0.899528	X	G	0.132526
1682	-0.25	0.51649	-0.675759	0.68313	9	CCDC63	0.870586	X	G	0.0767015
1683	0.0675845	0.862841	0.179085	0.179222	9	CCDC65	0.9686	C	G	0.0648765
1684	0.181476	0.640296	0.485519	0.488248	9	CCDC66	0.907758	X	G	0.0109293
1685	0.224943	0.560636	0.605497	0.610796	9	CCDC69	0.880524	X	G	0.0572261
1686	0.197443	0.610611	0.529337	0.532876	9	CCDC71	0.898148	A	G	-0.0982067
1687	0.624131	0.0724162	1.93601	2.11347	9	CCDC71L	0.585592	X	G	0.074826
1688	0.252083	0.512883	0.681642	0.689208	9	CCDC73	0.870586	B	G	0.0910859
1689	-0.324331	0.39449	-0.890241	0.907135	9	CCDC77	0.848233	A	G	-0.0992775
1690	0.458948	0.213994	1.31223	1.3667	9	CCDC78	0.745082	A	G	-0.11917
1691	-0.029629	0.939684	-0.0784139	0.0784254	9	CCDC80	0.987549	C	G	0.45578
1692	0.925867	0.000339508	4.30897	6.48305	9	CCDC82	0.088713	G	G	0.690049
1693	0.824397	0.00626364	3.09656	3.85354	9	CCDC83	0.250845	A	G	-0.196634
1694	0.237269	0.538745	0.63995	0.646208	9	CCDC84	0.876415	X	G	0.0982217
1695	-0.422585	0.257157	-1.1928	1.23362	9	CCDC85A	0.77766	B	G	-0.242729
1696	0.0847344	0.82841	0.224725	0.224995	9	CCDC85C	0.960396	C	G	-0.26872
1697	-0.452142	0.221745	-1.28951	1.34118	9	CCDC86	0.752867	A	G	0.0615364
1698	0.827203	0.00593749	3.11991	3.89494	9	CCDC88A	0.245989	B	G	-0.170831
1699	0.147293	0.705309	0.392556	0.393998	9	CCDC88C	0.927273	F	G	-0.236829
1700	0.559621	0.117164	1.67286	1.78657	9	CCDC89	0.672402	C	G	0.112272
1701	0.252195	0.512689	0.681958	0.689534	9	CCDC90B	0.870586	B	G	0.160449
1702	0.228821	0.553713	0.616315	0.621904	9	CCDC91	0.879946	D	G	-0.106184
1703	0.275099	0.473724	0.747087	0.757055	9	CCDC92	0.870586	A	G	0.264086
1704	0.186815	0.63032	0.500138	0.503122	9	CCDC93	0.904566	A	G	-0.168283
1705	0.857949	0.00308699	3.40117	4.41847	9	CCDC9B	0.195375	C	G	0.417577
1706	0.105249	0.787558	0.279497	0.280018	9	CCK	0.948226	B	G	0.245264
1707	0.499594	0.170874	1.4519	1.52587	9	CCKAR	0.699613	X	G	-0.00280021
1708	-0.055259	0.887713	-0.146351	0.146425	9	CCKBR	0.975152	A	G	0.212142
1709	-0.13099	0.736936	-0.348569	0.349578	9	CCL17	0.935077	C	G	0.0493398
1710	0.276627	0.47117	0.751462	0.761606	9	CCL19	0.870586	C	G	-0.0862578
1711	-0.135002	0.729119	-0.359376	0.360482	9	CCL20	0.933429	A	G	-0.233767
1712	-0.316588	0.406521	-0.867409	0.883032	9	CCL28	0.851882	X	G	-0.121409
1713	-0.389904	0.299565	-1.08922	1.12025	9	CCM2	0.798998	D	G	-0.116287
1714	-0.0807702	0.836348	-0.214165	0.214398	9	CCM2L	0.960836	L	G	0.00398764
1715	-0.103853	0.790324	-0.275764	0.276264	9	CCN1	0.948317	C	G	0.055206
1716	0.731523	0.0250936	2.46583	2.83864	9	CCN2	0.419314	C	G	-0.0831138
1717	0.495292	0.17518	1.43677	1.50844	9	CCN3	0.703949	X	G	0.0152519
1718	0.129581	0.739685	0.344778	0.345755	9	CCN4	0.935493	C	G	-0.133027
1719	-0.49952	0.170947	-1.45164	1.52557	9	CCN5	0.699613	B	G	0.00963088
1720	0.697139	0.0368627	2.27988	2.5727	9	CCN6	0.476927	X	G	-0.0442227
1721	0.488477	0.182126	1.41298	1.48112	9	CCNA1	0.714247	G	G	0.75582
1722	0.304461	0.425692	0.831902	0.845678	9	CCNA2	0.860109	X	G	0.0224609
1723	0.014891	0.96967	0.0394009	0.0394024	9	CCNB2	0.992601	X	G	0.200875
1724	-0.360103	0.341124	-0.99746	1.02126	9	CCNB3	0.817867	B	G	0.264019
1725	0.187276	0.629459	0.501405	0.504411	9	CCNC	0.904474	X	G	0.109607
1726	0.854416	0.00335203	3.36615	4.35069	9	CCND1	0.197691	C	G	-0.0266057
1727	0.0453798	0.907712	0.120146	0.120188	9	CCND2	0.980567	C	G	-0.162264
1728	-0.335251	0.377808	-0.92266	0.941475	9	CCND3	0.836766	X	G	0.0535173
1729	-0.217632	0.573772	-0.585158	0.589941	9	CCNDBP1	0.884266	J	G	-0.0176969
1730	0.292478	0.445025	0.797097	0.80921	9	CCNE1	0.867773	B	G	0.132107
1731	-0.149637	0.700793	-0.398897	0.40041	9	CCNE2	0.926299	X	G	0.0967722
1732	-0.228794	0.553761	-0.616239	0.621826	9	CCNF	0.879946	A	G	-0.0186294
1733	-0.322388	0.397493	-0.8845	0.901068	9	CCNG1	0.849511	B	G	0.465764
1734	-0.484748	0.185991	-1.40006	1.46632	9	CCNG2	0.717024	A	G	-0.207577
1735	-0.151964	0.696316	-0.405199	0.406785	9	CCNH	0.924775	E	G	0.13556
1736	0.260663	0.498137	0.705937	0.714343	9	CCNI	0.870586	B	G	-0.167515
1737	-0.193681	0.617563	-0.518988	0.522323	9	CCNJ	0.900168	A	G	-0.143792
1738	0.0224403	0.954304	0.0593813	0.0593863	9	CCNK	0.989795	B	G	-0.133283
1739	0.0921734	0.81355	0.244562	0.24491	9	CCNL1	0.955896	A	G	-0.0300251
1740	-0.105164	0.787727	-0.27927	0.279789	9	CCNL2	0.948226	A	G	-0.117071
1741	-0.073891	0.850154	-0.195854	0.196033	9	CCNO	0.964759	A	G	0.158739
1742	-0.316911	0.406015	-0.868361	0.884035	9	CCNT1	0.851644	D	G	-0.0759616
1743	0.822172	0.00653077	3.07829	3.82135	9	CCNT2	0.254281	A	G	0.230989
1744	0.0488669	0.900647	0.129393	0.129444	9	CCNY	0.979118	A	G	-0.201606
1745	-0.528166	0.14383	-1.55464	1.64566	9	CCNYL1	0.699613	B	G	-0.190185
1746	0.48732	0.18332	1.40897	1.47652	9	CCP110	0.715201	A	G	0.330706
1747	0.174347	0.653697	0.466041	0.468455	9	CCPG1	0.912431	A	G	-0.246445
1748	0.583123	0.0993376	1.7652	1.8991	9	CCR10	0.643296	X	G	0.0181921
1749	-0.344187	0.364411	-0.949386	0.969892	9	CCR4	0.8314	X	G	-0.108249
1750	0.389135	0.300604	1.08682	1.11765	9	CCR5	0.799509	X	G	0.141316
1751	-0.00052764	0.998925	-0.001396	0.001396	9	CCR6	0.999801	L	G	-0.13457
1752	-0.140753	0.717952	-0.374887	0.376142	9	CCR7	0.929702	X	G	-0.104394
1753	-0.25	0.51649	-0.675759	0.68313	9	CCR9	0.870586	F	G	-0.10817
1754	-0.327655	0.389377	-0.900081	0.917543	9	CCSAP	0.845074	F	G	-0.0151041
1755	0.554454	0.121323	1.65304	1.7627	9	CCSER1	0.679934	A	G	-0.0436673
1756	0.744571	0.0213753	2.54166	2.95104	9	CCSER2	0.396134	A	G	-0.117135
1757	-0.147702	0.704522	-0.393661	0.395115	9	CCT2	0.927225	A	G	0.0434838
1758	-0.273111	0.477056	-0.741398	0.751139	9	CCT3	0.870586	A	G	0.042083
1759	-0.48634	0.184335	-1.40557	1.47262	9	CCT4	0.716029	A	G	0.0908105
1760	0.644104	0.0611679	2.02441	2.22781	9	CCT5	0.554846	A	G	0.458311
1761	-0.390264	0.29908	-1.09034	1.12147	9	CCT7	0.798573	D	G	0.113811
1762	-0.634689	0.0663217	-1.98228	2.17301	9	CCT8	0.568079	B	G	-0.212679
1763	0.178497	0.645887	0.477371	0.479966	9	CCZ1	0.909532	A	G	0.089425
1764	0.583441	0.0991083	1.76647	1.90067	9	CD101	0.643296	X	G	-0.0974643
1765	0.305346	0.42428	0.834484	0.848388	9	CD109	0.860036	A	G	0.496796
1766	0.280017	0.465525	0.761185	0.771729	9	CD14	0.870586	C	G	0.0518456
1767	0.763887	0.0165699	2.66026	3.13172	9	CD151	0.358373	I	G	-0.159022
1768	0.0503746	0.897594	0.133392	0.133448	9	CD164	0.97797	A	G	0.43139
1769	-0.803061	0.00915125	-2.9293	3.56555	9	CD164L2	0.290349	B	G	-0.00245253
1770	-0.363724	0.335932	-1.00848	1.03308	9	CD180	0.815034	X	G	0.0100372
1771	0.817584	0.00710582	3.04126	3.75667	9	CD2	0.265337	C	G	0.156167
1772	0.205143	0.596467	0.550569	0.554551	9	CD24	0.893764	B	G	0.514706
1773	-0.581543	0.100481	-1.75887	1.89132	9	CD247	0.644956	E	G	0.055713
1774	0.702545	0.0348149	2.30791	2.61194	9	CD274	0.468751	E	G	-0.0247572
1775	0.14865	0.702694	0.396226	0.397709	9	CD28	0.92694	X	G	0.105863
1776	0.480092	0.190882	1.384	1.44799	9	CD2AP	0.722683	A	G	-0.0090549
1777	0.157905	0.684928	0.421302	0.423084	9	CD320	0.920048	X	G	-0.0270517
1778	0.502827	0.167678	1.46332	1.53907	9	CD34	0.699613	J	G	-0.169375
1779	0.60534	0.0841025	1.85608	2.01212	9	CD36	0.614585	X	G	0.0129114
1780	0.589765	0.0946197	1.79198	1.93217	9	CD38	0.63369	C	G	0.0911132
1781	-0.299641	0.433424	-0.817867	0.830955	9	CD3E	0.862432	X	G	-0.053307
1782	0.479898	0.191088	1.38334	1.44723	9	CD4	0.722824	A	G	-0.0993337
1783	-0.208733	0.589911	-0.560491	0.564693	9	CD40	0.892044	B	G	0.0924463
1784	0.220992	0.56772	0.594498	0.599513	9	CD40LG	0.882133	X	G	-0.107012
1785	0.306312	0.42274	0.837303	0.85135	9	CD44	0.860036	C	G	-0.0711907
1786	-0.490772	0.179769	-1.42097	1.49028	9	CD47	0.710993	B	G	-0.330826
1787	0.425036	0.254113	1.2007	1.24234	9	CD5	0.775448	X	G	0.11022
1788	0.757498	0.0180698	2.62014	3.06991	9	CD58	0.373114	A	G	0.0228629
1789	0.693287	0.0383688	2.26015	2.54525	9	CD59	0.482146	A	G	-0.256767
1790	-0.43726	0.239222	-1.24043	1.28637	9	CD6	0.764747	X	G	-0.146081
1791	0.541132	0.132445	1.60268	1.70251	9	CD7	0.692362	X	G	-0.0223908
1792	0.625567	0.0715675	1.94225	2.12146	9	CD74	0.583363	C	G	0.0562392
1793	0.484108	0.18666	1.39784	1.46379	9	CD79B	0.71703	X	G	0.138835
1794	0.217045	0.574832	0.583528	0.588271	9	CD80	0.884818	C	G	-0.0303759
1795	-0.711419	0.0316162	-2.35485	2.67832	9	CD81	0.456879	B	G	-0.0931116
1796	0.627923	0.0701889	1.95251	2.13463	9	CD82	0.576919	F	G	0.602342
1797	0.490267	0.180286	1.41921	1.48826	9	CD83	0.711634	G	G	0.531994
1798	-0.28605	0.45555	-0.778536	0.78982	9	CD84	0.870543	D	G	-0.0485622
1799	0.406033	0.278215	1.13993	1.17552	9	CD86	0.789389	C	G	0.123442
1800	0.290655	0.448	0.791823	0.803697	9	CD8B	0.868323	A	G	-0.106611
1801	0.549151	0.125681	1.63287	1.73851	9	CD9	0.686128	I	G	-0.105322
1802	0.0595659	0.879011	0.157783	0.157877	9	CD93	0.972841	X	G	-0.118387
1803	-0.5069	0.163702	-1.47778	1.55583	9	CD96	0.699613	A	G	-0.132952
1804	0.637691	0.0646503	1.99562	2.1903	9	CD99	0.56462	C	G	0.017461
1805	0.926012	0.000337243	4.31165	6.49015	9	CD99L2	0.088713	F	G	0.0115977
1806	-0.181826	0.63964	-0.486477	0.489222	9	CDA	0.907736	X	G	0.00226799
1807	0.497397	0.173065	1.44416	1.51695	9	CDADC1	0.702554	G	G	0.531368
1808	0.247832	0.520253	0.669645	0.676818	9	CDAN1	0.871667	A	G	0.102789
1809	-0.448886	0.225507	-1.2787	1.32907	9	CDC123	0.756774	B	G	0.0330652
1810	-0.667172	0.0496307	-2.13149	2.36966	9	CDC14A	0.519928	A	G	-0.291436
1811	0.499359	0.171108	1.45107	1.52491	9	CDC14B	0.699613	E	G	0.31767
1812	-0.345588	0.362331	-0.953594	0.974375	9	CDC16	0.830252	D	G	-0.229443
1813	0.5	0.170471	1.45333	1.52753	9	CDC20B	0.699613	X	G	0.057861
1814	0.455514	0.217886	1.30075	1.35378	9	CDC23	0.748126	A	G	0.0120128
1815	0.112838	0.772554	0.299818	0.30046	9	CDC25A	0.945626	X	G	-0.0645521
1816	-0.43417	0.24294	-1.23034	1.27516	9	CDC26	0.768476	B	G	0.0492909
1817	0.471276	0.20034	1.35386	1.41372	9	CDC27	0.733232	A	G	0.142671
1818	-0.165005	0.671388	-0.44059	0.442629	9	CDC34	0.917201	I	G	-0.218694
1819	-0.0989544	0.800049	-0.262668	0.2631	9	CDC37L1	0.950949	E	G	0.151409
1820	-0.497702	0.17276	-1.44523	1.51819	9	CDC40	0.701962	A	G	-0.208643
1821	0.263463	0.493361	0.713894	0.722588	9	CDC42	0.870586	A	G	0.239132
1822	0.539183	0.134122	1.5954	1.69385	9	CDC42BPA	0.694653	X	G	0.123086
1823	0.601514	0.0866156	1.84016	1.99215	9	CDC42BPB	0.61962	I	G	0.186239
1824	-0.0894989	0.818887	-0.237427	0.237746	9	CDC42EP1	0.957735	X	G	-0.119974
1825	-0.417468	0.263573	-1.17636	1.2155	9	CDC42EP3	0.780559	A	G	0.155098
1826	0.398415	0.288198	1.11588	1.14926	9	CDC42EP4	0.795045	C	G	0.00649271
1827	-0.512282	0.158531	-1.49702	1.57818	9	CDC42SE1	0.699613	D	G	-0.0713669
1828	-0.215957	0.576798	-0.580507	0.585176	9	CDC42SE2	0.885585	B	G	0.164417
1829	0.404872	0.279724	1.13625	1.1715	9	CDC45	0.789946	X	G	0.313419
1830	-0.224099	0.562146	-0.603145	0.608383	9	CDC5L	0.880524	X	G	0.0813654
1831	0.536898	0.136103	1.58689	1.68376	9	CDC6	0.697988	X	G	0.00327025
1832	-0.0401039	0.91841	-0.106162	0.10619	9	CDC7	0.982486	X	G	0.308738
1833	0.125159	0.748334	0.332884	0.333763	9	CDC73	0.938319	B	G	0.0596687
1834	-0.126785	0.745151	-0.337256	0.33817	9	CDCA2	0.93707	X	G	0.0257413
1835	0.454297	0.219274	1.29669	1.34923	9	CDCA3	0.749571	X	G	0.309979
1836	0.0456909	0.907081	0.120971	0.121013	9	CDCA7	0.980567	B	G	0.147056
1837	0.863193	0.00272075	3.45466	4.5235	9	CDCA7L	0.182822	C	G	0.230723
1838	-0.152294	0.695684	-0.40609	0.407687	9	CDCA8	0.924649	X	G	0.127451
1839	0.386665	0.303951	1.07913	1.1093	9	CDCP1	0.801073	X	G	-0.0694832
1840	-0.167464	0.666718	-0.44728	0.449414	9	CDCP2	0.916692	G	G	0.628744
1841	0.445712	0.229208	1.2682	1.31733	9	CDH10	0.759056	C	G	0.134867
1842	0.572349	0.107289	1.72241	1.84667	9	CDH11	0.655106	C	G	-0.0103224
1843	0.710511	0.0319341	2.35	2.67141	9	CDH12	0.458042	C	G	0.167474
1844	0.348001	0.358763	0.96085	0.982111	9	CDH13	0.829114	B	G	0.448111
1845	-0.283082	0.460446	-0.769991	0.780906	9	CDH15	0.870586	X	G	-0.19408
1846	-0.366746	0.331627	-1.01771	1.04299	9	CDH17	0.812739	A	G	-0.165605
1847	0.190677	0.623134	0.510733	0.513911	9	CDH19	0.90185	I	G	-0.310205
1848	-0.133529	0.731987	-0.355406	0.356476	9	CDH2	0.933821	B	G	0.322297
1849	0.317015	0.405853	0.868666	0.884357	9	CDH20	0.851644	A	G	-0.240148
1850	-0.586743	0.0967485	-1.77976	1.91705	9	CDH22	0.637111	B	G	0.090332
1851	0.542835	0.130992	1.60906	1.7101	9	CDH23	0.691404	C	G	-0.071451
1852	-0.526872	0.144997	-1.54989	1.64007	9	CDH4	0.699613	B	G	-0.183933
1853	0.316665	0.406399	0.867638	0.883273	9	CDH5	0.851794	A	G	-0.0537033
1854	0.142168	0.715212	0.378706	0.38	9	CDH8	0.92891	C	G	-0.27916
1855	0.58835	0.095613	1.78625	1.92507	9	CDH9	0.635055	C	G	0.512211
1856	0.492443	0.178064	1.4268	1.49697	9	CDHR1	0.708702	C	G	-0.0814842
1857	0.142863	0.713867	0.380582	0.381896	9	CDHR2	0.928245	X	G	0.0615581
1858	0.234426	0.543765	0.631984	0.638011	9	CDHR3	0.877586	X	G	0.100949
1859	0.74253	0.0219309	2.52959	2.93299	9	CDHR4	0.398568	C	G	0.138578
1860	0.73126	0.0251727	2.46433	2.83644	9	CDHR5	0.419587	A	G	-0.152061
1861	0.11181	0.774583	0.297062	0.297687	9	CDIP1	0.946388	D	G	-0.0475426
1862	0.358247	0.343802	0.991821	1.01521	9	CDK1	0.819144	X	G	0.291871
1863	-0.356268	0.346667	-0.985819	1.00879	9	CDK10	0.820859	A	G	-0.00138895
1864	0.368909	0.328563	1.02433	1.05011	9	CDK12	0.810604	B	G	-0.0992904
1865	0.170042	0.661831	0.454302	0.456538	9	CDK13	0.915055	A	G	-0.14502
1866	-0.315087	0.408871	-0.863	0.878384	9	CDK14	0.853571	B	G	0.235135
1867	-0.322155	0.397853	-0.883813	0.900343	9	CDK15	0.849511	X	G	-0.0862977
1868	-0.560077	0.116801	-1.67462	1.78869	9	CDK17	0.671278	B	G	-0.124125
1869	-0.424753	0.254463	-1.19979	1.24133	9	CDK18	0.776046	A	G	-0.214146
1870	0.369775	0.327341	1.02698	1.05297	9	CDK19	0.809158	X	G	0.225723
1871	0.523197	0.14834	1.53647	1.6243	9	CDK2	0.699613	B	G	0.254238
1872	-0.608602	0.0819963	-1.86974	2.02931	9	CDK20	0.608508	X	G	-0.0230393
1873	0.637317	0.064857	1.99395	2.18814	9	CDK2AP1	0.565482	A	G	0.260846
1874	-0.48577	0.184928	-1.40359	1.47036	9	CDK2AP2	0.716555	D	G	-0.148255
1875	0.101677	0.794641	0.269945	0.270414	9	CDK3	0.948695	J	G	-0.108079
1876	-0.401384	0.284284	-1.12523	1.15946	9	CDK5	0.79301	X	G	-0.131985
1877	-0.523696	0.147884	-1.53829	1.62643	9	CDK5R1	0.699613	A	G	-0.0889602
1878	-0.0152322	0.968975	-0.0403038	0.0403054	9	CDK5R2	0.992278	D	G	-0.0163989
1879	0.0567531	0.884693	0.150316	0.150397	9	CDK5RAP1	0.974432	B	G	-0.130476
1880	-0.240354	0.533319	-0.648605	0.655121	9	CDK5RAP2	0.875272	A	G	-0.333214
1881	0.0264063	0.946237	0.0698808	0.0698889	9	CDK5RAP3	0.988829	D	G	-0.074459
1882	0.59638	0.0900595	1.81898	1.9657	9	CDK6	0.627399	A	G	-0.0961725
1883	0.211375	0.585102	0.567806	0.572175	9	CDK7	0.890695	E	G	-0.0123527
1884	-0.536649	0.13632	-1.58596	1.68266	9	CDK8	0.698563	B	G	-0.0951544
1885	-0.73247	0.0248104	-2.47123	2.84656	9	CDK9	0.417715	A	G	-0.262156
1886	0.310497	0.416101	0.849537	0.864211	9	CDKAL1	0.856814	D	G	-0.075776
1887	0.655826	0.0551139	2.07812	2.29849	9	CDKL1	0.533475	C	G	0.00771483
1888	-0.449906	0.224325	-1.28208	1.33285	9	CDKL2	0.755105	X	G	-0.020799
1889	-0.800345	0.00957338	-2.90919	3.5319	9	CDKL5	0.293525	A	G	-0.273488
1890	0.596157	0.0902116	1.81806	1.96456	9	CDKN1A	0.627399	F	G	0.450491
1891	-0.194813	0.615468	-0.522101	0.525496	9	CDKN1B	0.899779	X	G	-0.339986
1892	-0.127162	0.744413	-0.33827	0.339193	9	CDKN1C	0.937063	X	G	0.106111
1893	0.0978498	0.802246	0.259717	0.260135	9	CDKN2AIP	0.952113	B	G	0.169419
1894	0.776262	0.0139052	2.74072	3.25787	9	CDKN2C	0.339951	X	G	0.158357
1895	0.00533261	0.989137	0.0141089	0.014109	9	CDKN3	0.997454	X	G	0.105686
1896	0.900405	0.000930137	3.90078	5.47577	9	CDO1	0.125252	C	G	0.61186
1897	-0.30325	0.42763	-0.82837	0.84197	9	CDON	0.861014	C	G	-0.147486
1898	0.459437	0.213443	1.31387	1.36854	9	CDR2	0.744861	A	G	0.359278
1899	0.187107	0.629774	0.500941	0.50394	9	CDR2L	0.904516	A	G	0.0341683
1900	0.60345	0.0853382	1.8482	2.00223	9	CDS1	0.615916	C	G	-0.0923519
1901	-0.250207	0.51613	-0.676344	0.683734	9	CDS2	0.870586	X	G	-0.230019
1902	0.08494	0.827999	0.225273	0.225545	9	CDT1	0.960396	G	G	0.43233
1903	-0.512542	0.158284	-1.49795	1.57927	9	CDV3	0.699613	B	G	-0.246522
1904	0.407824	0.275894	1.1456	1.18174	9	CDX2	0.78818	X	G	0.0803827
1905	0.419913	0.260497	1.1842	1.22414	9	CDYL	0.77885	G	G	0.472101
1906	0.209938	0.587717	0.563826	0.568103	9	CDYL2	0.891833	X	G	-0.0462267
1907	0.70308	0.0346164	2.31071	2.61587	9	CEBPA	0.467741	C	G	0.202294
1908	0.553022	0.12249	1.64758	1.75614	9	CEBPB	0.681615	A	G	-0.132746
1909	0.55247	0.122943	1.64547	1.75362	9	CEBPD	0.681615	C	G	-0.00795115
1910	0.30571	0.4237	0.835545	0.849503	9	CEBPG	0.860036	A	G	-0.0241662
1911	0.631216	0.0682897	1.96694	2.1532	9	CEBPZ	0.572784	H	G	0.23465
1912	0.0881398	0.821601	0.233803	0.234107	9	CEL	0.958799	X	G	0.00261379
1913	-0.525296	0.146425	-1.54413	1.63329	9	CELF1	0.699613	B	G	-0.108862
1914	-0.216455	0.575898	-0.58189	0.586592	9	CELF2	0.885507	A	G	-0.219204
1915	-0.164425	0.672491	-0.439014	0.441031	9	CELF3	0.917707	A	G	-0.171324
1916	-0.829611	0.00566705	-3.14021	3.93119	9	CELF4	0.242293	B	G	-0.0492965
1917	-0.28104	0.463827	-0.764122	0.774789	9	CELF5	0.870586	B	G	0.122546
1918	-0.275814	0.472529	-0.749132	0.759182	9	CELF6	0.870586	B	G	0.277971
1919	0.530853	0.141426	1.56452	1.6573	9	CELSR1	0.699613	C	G	-0.102871
1920	0.208285	0.590727	0.559253	0.563427	9	CELSR2	0.892044	D	G	0.0954707
1921	-0.00621368	0.987342	-0.0164401	0.0164402	9	CELSR3	0.997218	B	G	0.337048
1922	-0.383374	0.308439	-1.06891	1.09823	9	CEMIP	0.805144	X	G	-0.412456
1923	0.475855	0.195395	1.36947	1.43145	9	CEMIP2	0.729488	E	G	0.15382
1924	-0.272558	0.477984	-0.739818	0.749497	9	CEND1	0.870586	D	G	-0.0610686
1925	0.513436	0.157435	1.50116	1.58301	9	CENPC	0.699613	A	G	0.106255
1926	0.854468	0.00334801	3.36666	4.35167	9	CENPE	0.197691	G	G	0.889999
1927	0.806668	0.00861031	2.9564	3.61121	9	CENPF	0.283606	X	G	0.246275
1928	-0.121853	0.754815	-0.324002	0.324812	9	CENPH	0.940775	E	G	0.163713
1929	0.0874659	0.822948	0.232006	0.232303	9	CENPI	0.958799	C	G	0.141251
1930	0.541701	0.131959	1.60481	1.70504	9	CENPJ	0.692328	A	G	0.219769
1931	0.736318	0.0236815	2.49332	2.87912	9	CENPK	0.413393	E	G	0.237903
1932	0.0804329	0.837024	0.213266	0.213497	9	CENPL	0.960836	X	G	0.40272
1933	0.7705	0.0151071	2.70279	3.19803	9	CENPM	0.349128	C	G	0.398992
1934	0.00788974	0.983928	0.0208747	0.0208749	9	CENPN	0.996331	X	G	0.208547
1935	0.439902	0.236067	1.24908	1.296	9	CENPP	0.762565	X	G	0.290128
1936	0.502957	0.167551	1.46378	1.5396	9	CENPQ	0.699613	X	G	0.0911315
1937	0.082081	0.833722	0.217656	0.217901	9	CENPS	0.960756	X	G	0.144162
1938	0.110261	0.777642	0.292914	0.293512	9	CENPT	0.946578	A	G	-0.0246962
1939	0.429949	0.24807	1.21661	1.25994	9	CENPU	0.771687	C	G	0.282739
1940	-0.127633	0.743492	-0.339537	0.34047	9	CENPV	0.936758	X	G	-0.0195541
1941	0.227443	0.556169	0.612468	0.617953	9	CENPW	0.879946	F	G	-0.00538679
1942	0.112071	0.774066	0.297763	0.298392	9	CENPX	0.946386	X	G	-0.0672289
1943	0.268435	0.484931	0.728048	0.737271	9	CEP104	0.870586	X	G	-0.118266
1944	0.181097	0.641007	0.484481	0.487193	9	CEP112	0.907758	A	G	-0.449452
1945	0.188906	0.626425	0.505874	0.508962	9	CEP120	0.903014	E	G	0.068575
1946	0.0339122	0.930981	0.0897576	0.0897748	9	CEP126	0.986016	A	G	-0.0162985
1947	0.708177	0.0327614	2.33757	2.65378	9	CEP128	0.460751	A	G	0.0665305
1948	0.171299	0.659454	0.457726	0.460013	9	CEP131	0.914519	D	G	0.0263979
1949	0.695788	0.0373864	2.27294	2.56302	9	CEP135	0.477498	A	G	-0.13333
1950	0.355771	0.347388	0.984315	1.00718	9	CEP152	0.821414	A	G	0.0617956
1951	0.406743	0.277293	1.14218	1.17799	9	CEP162	0.788977	A	G	-0.145652
1952	0.4002	0.285842	1.1215	1.15539	9	CEP164	0.794525	X	G	0.113206
1953	0.636442	0.0653424	1.99006	2.18309	9	CEP170	0.56696	X	G	0.31495
1954	0.80998	0.00813309	2.98168	3.65415	9	CEP170B	0.27743	C	G	0.283299
1955	0.0599402	0.878256	0.158777	0.158872	9	CEP19	0.972504	X	G	0.143051
1956	0.529334	0.142782	1.55893	1.65071	9	CEP192	0.699613	A	G	0.0263671
1957	0.318697	0.403226	0.873617	0.889579	9	CEP20	0.850494	A	G	-0.0717355
1958	0.20031	0.605331	0.537234	0.540933	9	CEP250	0.897372	A	G	0.00438752
1959	0.502203	0.168292	1.46111	1.53652	9	CEP290	0.699613	A	G	0.0102235
1960	0.636025	0.0655748	1.9882	2.18068	9	CEP295	0.567043	X	G	-0.0514233
1961	-0.115422	0.76746	-0.306744	0.307432	9	CEP350	0.943936	A	G	-0.356144
1962	0.185606	0.632574	0.496825	0.49975	9	CEP41	0.905704	E	G	0.258101
1963	0.462122	0.21043	1.32289	1.37871	9	CEP43	0.743375	C	G	0.0547397
1964	0.544721	0.129392	1.61614	1.71854	9	CEP44	0.690259	X	G	0.107992
1965	0.370991	0.325627	1.03071	1.05698	9	CEP55	0.809079	X	G	0.230523
1966	-0.393075	0.295303	-1.09913	1.13102	9	CEP57	0.795856	B	G	0.0455533
1967	-0.11933	0.75977	-0.317228	0.317989	9	CEP57L1	0.941064	A	G	-0.208362
1968	0.282747	0.460999	0.769029	0.779904	9	CEP63	0.870586	X	G	-0.0277376
1969	0.597042	0.0896113	1.8217	1.96909	9	CEP68	0.62631	B	G	0.223987
1970	0.674148	0.0464393	2.16504	2.41489	9	CEP76	0.513492	A	G	0.0276446
1971	0.325117	0.393278	0.892565	0.909592	9	CEP78	0.847529	E	G	0.0560574
1972	0.444896	0.230164	1.26551	1.31432	9	CEP83	0.760515	A	G	-0.303114
1973	-0.184215	0.635172	-0.493014	0.495873	9	CEP85	0.906326	D	G	0.0991059
1974	-0.0258259	0.947417	-0.068344	0.0683516	9	CEP85L	0.989026	A	G	-0.308606
1975	0.660392	0.0528634	2.09943	2.32679	9	CEP89	0.529744	A	G	-0.00523471
1976	0.305656	0.423786	0.835386	0.849336	9	CEP95	0.860036	A	G	0.0392644
1977	0.303365	0.427445	0.828707	0.842324	9	CEP97	0.860787	B	G	-0.0116469
1978	0.082185	0.833514	0.217933	0.218179	9	CEPT1	0.960756	B	G	-0.187728
1979	0.407392	0.276453	1.14423	1.18024	9	CER1	0.788871	E	G	-0.155268
1980	-0.176073	0.650445	-0.470751	0.473239	9	CERCAM	0.910371	I	G	-0.271425
1981	0.13203	0.734908	0.351369	0.352403	9	CERK	0.934727	X	G	0.0926323
1982	0.17069	0.660605	0.456069	0.45833	9	CERKL	0.91458	A	G	0.0121783
1983	-0.514632	0.156304	-1.50546	1.58802	9	CERS1	0.699613	B	G	-0.308876
1984	-0.0125519	0.974433	-0.0332109	0.0332118	9	CERS2	0.993407	I	G	-0.240336
1985	-0.206987	0.593095	-0.555665	0.559759	9	CERS3	0.89313	X	G	-0.253514
1986	0.571318	0.10807	1.71835	1.84173	9	CERS4	0.656145	X	G	-0.0230011
1987	0.400199	0.285843	1.1215	1.15538	9	CERS5	0.794525	A	G	-0.0362657
1988	0.679243	0.0441938	2.18991	2.44866	9	CERS6	0.507612	B	G	0.571646
1989	-0.100136	0.797701	-0.265826	0.266274	9	CERT1	0.949943	A	G	-0.143953
1990	0.61254	0.0794969	1.88636	2.05028	9	CES2	0.602446	A	G	0.328969
1991	-0.516775	0.154289	-1.51318	1.59704	9	CETN2	0.699613	X	G	0.00684495
1992	0.849156	0.003775	3.31544	4.25388	9	CETN3	0.209639	E	G	0.474989
1993	-0.26939	0.483318	-0.730772	0.740099	9	CETP	0.870586	X	G	0.120639
1994	0.350305	0.355372	0.967792	0.989519	9	CFAP100	0.827627	X	G	0.0384108
1995	-0.18035	0.642407	-0.482439	0.485117	9	CFAP161	0.908282	A	G	-0.0225357
1996	0.571433	0.107982	1.71881	1.84229	9	CFAP20	0.656145	F	G	0.513282
1997	0.482134	0.188728	1.39103	1.45601	9	CFAP206	0.719463	X	G	0.0406746
1998	0.672809	0.0470414	2.15856	2.40612	9	CFAP20DC	0.514326	F	G	-0.139861
1999	0.825221	0.00616665	3.10338	3.8656	9	CFAP221	0.250641	C	G	0.0836769
[truncated: 18,791 more rows]

## Sheet: sex_difference_suppl
	cor	p	Z	t	nObs	gene_id	q	me_assigned	module	membership
1	-0.876898	0.0508795	-2.35937	3.15979	5	A1CF	0.638382	X	G	0.128427
2	0.839814	0.0750847	2.11404	2.67944	5	A2M	0.686682	X	G	-0.0520214
3	0.612372	0.272228	1.23445	1.34164	5	A4GNT	0.767629	J	G	0.10048
4	-0.000723033	0.999079	-0.00125233	0.00125233	5	AAAS	0.999537	D	G	-0.0767147
5	-0.13967	0.822746	-0.243508	0.244311	5	AACS	0.935216	A	G	0.274721
6	-0.218841	0.723603	-0.385275	0.38846	5	AADAC	0.894337	X	G	0.108282
7	-0.00302242	0.996152	-0.00523501	0.00523502	5	AADAT	0.998631	A	G	0.0191371
8	-0.80619	0.0993917	-1.93305	2.36009	5	AAGAB	0.720034	C	G	-0.286006
9	0.897595	0.0387281	2.52828	3.52679	5	AAK1	0.587606	A	G	0.541977
10	-0.668319	0.217536	-1.39898	1.55612	5	AAMDC	0.767629	B	G	-0.119138
11	0.265793	0.66561	0.471692	0.477544	5	AAMP	0.872335	A	G	-0.22531
12	0.404936	0.498879	0.743983	0.767073	5	AANAT	0.807021	X	G	0.0804673
13	-0.248651	0.686701	-0.439897	0.444642	5	AAR2	0.88117	A	G	0.312057
14	0.818577	0.0901953	1.99617	2.46836	5	AARS1	0.70554	A	G	0.00344072
15	-0.386878	0.519992	-0.706889	0.726677	5	AARS2	0.81455	X	G	-0.0906305
16	0.266868	0.664291	0.473695	0.479623	5	AASDH	0.872335	A	G	-0.148327
17	-0.523958	0.3648	-1.00767	1.06549	5	AASDHPPT	0.799726	D	G	-0.109198
18	-0.342341	0.572788	-0.617895	0.631085	5	AASS	0.832624	X	G	0.0502014
19	0.0392111	0.950088	0.0679505	0.0679679	5	AATF	0.985145	A	G	-0.271955
20	0.122375	0.844577	0.213027	0.213565	5	AATK	0.945265	B	G	-0.0907826
21	-0.399433	0.505293	-0.732613	0.754654	5	ABAT	0.809039	A	G	-0.287355
22	-0.652096	0.233049	-1.34916	1.48979	5	ABCA1	0.767629	A	G	-0.100629
23	-0.171405	0.782834	-0.299842	0.301342	5	ABCA12	0.922157	X	G	-0.0949454
24	0.747408	0.146481	1.67499	1.94855	5	ABCA13	0.758163	F	G	-0.0375708
25	0.993716	0.000597462	4.98805	15.3767	5	ABCA2	0.267997	D	G	0.0129349
26	-0.0262687	0.966557	-0.0455092	0.0455145	5	ABCA3	0.990516	A	G	-0.140886
27	-0.584349	0.300814	-1.15881	1.24722	5	ABCA4	0.779073	A	G	-0.0121087
28	0.928285	0.0228044	2.85069	4.32367	5	ABCA5	0.538908	B	G	0.099596
29	0.777302	0.121855	1.79876	2.13999	5	ABCA7	0.741039	B	G	-0.00474567
30	-0.0291721	0.962862	-0.0505419	0.0505491	5	ABCB1	0.989	X	G	-0.230712
31	-0.240575	0.696671	-0.425018	0.429296	5	ABCB10	0.884151	D	G	0.15171
32	0.794381	0.108407	1.87615	2.26517	5	ABCB11	0.729709	F	G	0.511437
33	-0.813904	0.0936329	-1.97192	2.42638	5	ABCB5	0.711595	X	G	0.0951411
34	0.912852	0.0304761	2.67493	3.8725	5	ABCB6	0.559859	D	G	0.0983547
35	-0.990948	0.0010325	-4.67076	12.7849	5	ABCB7	0.315101	A	G	-0.234906
36	-0.0978365	0.87563	-0.170002	0.170275	5	ABCB8	0.956534	D	G	-0.0082112
37	0.00383808	0.995113	0.00664778	0.0066478	5	ABCB9	0.998446	A	G	-0.0698881
38	-0.481425	0.411609	-0.909045	0.951357	5	ABCC10	0.805779	A	G	-0.211093
39	-0.598839	0.28594	-1.19743	1.29512	5	ABCC2	0.774822	A	G	-0.0788967
40	-0.952127	0.0124831	-3.21133	5.39458	5	ABCC3	0.472359	C	G	-0.16822
41	-0.14491	0.816142	-0.252771	0.253669	5	ABCC4	0.932921	C	G	0.341055
42	0.502068	0.388724	0.956208	1.00553	5	ABCC5	0.805779	D	G	0.0545772
43	0.498421	0.392744	0.947783	0.995795	5	ABCC8	0.805779	C	G	0.0703036
44	-0.488939	0.403243	-0.926068	0.970825	5	ABCC9	0.805779	C	G	-0.101405
45	0.404176	0.499764	0.742408	0.765351	5	ABCD2	0.807021	X	G	0.0539976
46	-0.705624	0.183027	-1.52146	1.72481	5	ABCD3	0.767629	B	G	-0.122601
47	-0.145965	0.814814	-0.254638	0.255556	5	ABCD4	0.93258	A	G	0.0405186
48	-0.213372	0.730403	-0.375337	0.378282	5	ABCE1	0.896881	X	G	0.401898
49	0.520966	0.368048	1.00054	1.05713	5	ABCF1	0.80153	B	G	-0.0404871
50	0.196849	0.750992	0.345461	0.347756	5	ABCF2	0.906899	I	G	-0.157804
51	0.490375	0.401649	0.929339	0.974576	5	ABCG1	0.805779	A	G	-0.16337
52	0.716208	0.17355	1.55852	1.77752	5	ABCG2	0.767629	A	G	0.034274
53	0.255653	0.678074	0.452848	0.458024	5	ABCG4	0.87825	D	G	-0.295046
54	-0.195073	0.75321	-0.342263	0.344494	5	ABCG5	0.907846	A	G	-0.0262509
55	0.889286	0.04348	2.45692	3.36785	5	ABCG8	0.60773	A	G	0.114304
56	-0.492791	0.39897	-0.934856	0.980912	5	ABHD10	0.805779	B	G	-0.135572
57	0.919466	0.0271008	2.74628	4.05058	5	ABHD11	0.550938	B	G	0.24342
58	-0.189311	0.760409	-0.3319	0.333935	5	ABHD12	0.911067	B	G	-0.180517
59	-0.583102	0.302103	-1.15554	1.24319	5	ABHD12B	0.779604	A	G	0.0531173
60	0.7508	0.14362	1.68838	1.96876	5	ABHD13	0.758088	D	G	0.0531348
61	0.38435	0.522961	0.701747	0.721103	5	ABHD14A	0.81455	X	G	-0.0154077
62	0.146992	0.813521	0.256455	0.257393	5	ABHD14B	0.93258	X	G	-0.0200421
63	-0.683456	0.203332	-1.44725	1.62164	5	ABHD15	0.767629	X	G	0.00739078
64	0.138203	0.824597	0.240916	0.241693	5	ABHD17A	0.936145	D	G	0.0127765
65	0.927544	0.0231564	2.84144	4.29887	5	ABHD17B	0.541574	E	G	0.249788
66	-0.543295	0.343979	-1.05451	1.12087	5	ABHD17C	0.790646	A	G	-0.304179
67	-0.34625	0.568116	-0.625576	0.639266	5	ABHD18	0.832375	D	G	-0.082994
68	-0.583209	0.301993	-1.15582	1.24353	5	ABHD2	0.779604	A	G	-0.194455
69	-0.375252	0.533677	-0.683332	0.701197	5	ABHD5	0.818573	B	G	0.154167
70	-0.726685	0.164312	-1.59637	1.83218	5	ABHD6	0.767629	B	G	-0.211972
71	0.145481	0.815424	0.25378	0.254689	5	ABHD8	0.932795	D	G	0.0843732
72	-0.0709728	0.90971	-0.123136	0.123239	5	ABI1	0.969785	B	G	0.168435
73	-0.293891	0.631265	-0.524499	0.532552	5	ABI2	0.855847	B	G	0.0832245
74	-0.396732	0.508449	-0.727053	0.748593	5	ABI3	0.810641	X	G	0.0393666
75	-0.854336	0.0652586	-2.20315	2.84721	5	ABI3BP	0.670862	I	G	-0.127943
76	0.111938	0.857774	0.194699	0.195109	5	ABITRAM	0.94966	A	G	-0.165405
77	-0.693646	0.193923	-1.48082	1.66792	5	ABL1	0.767629	X	G	-0.0359171
78	-0.694488	0.193151	-1.48363	1.67183	5	ABL2	0.767629	C	G	-0.0907756
79	-0.69961	0.188475	-1.50088	1.69589	5	ABLIM1	0.767629	A	G	-0.152278
80	-0.518537	0.370691	-0.99478	1.05038	5	ABLIM2	0.802782	B	G	0.537537
81	0.879507	0.0492912	2.37912	3.20108	5	ABLIM3	0.631279	D	G	0.245956
82	0.74039	0.152453	1.64777	1.90782	5	ABR	0.763044	A	G	0.265228
83	0.601533	0.283197	1.20472	1.30423	5	ABRA	0.773532	X	G	0.27139
84	-0.0189353	0.975892	-0.0328008	0.0328027	5	ABRACL	0.99416	A	G	-0.0223059
85	-0.935964	0.0192642	-2.95221	4.60426	5	ABRAXAS1	0.51541	A	G	-0.00259427
86	0.395073	0.510387	0.723647	0.744884	5	ABRAXAS2	0.811249	A	G	-0.0423865
87	0.732047	0.159642	1.61622	1.86119	5	ABT1	0.767452	B	G	0.18594
88	-0.212604	0.731358	-0.373944	0.376856	5	ABTB1	0.89709	B	G	-0.233834
89	0.488121	0.404152	0.924206	0.968691	5	ABTB2	0.805779	A	G	-0.230669
90	-0.615746	0.268838	-1.24383	1.35352	5	ACAA1	0.767629	X	G	0.103562
91	0.848473	0.069174	2.16623	2.77682	5	ACAA2	0.67888	E	G	0.084749
92	0.400055	0.504568	0.733894	0.756052	5	ACACA	0.808828	A	G	-0.292758
93	0.503497	0.387151	0.959521	1.00936	5	ACACB	0.805779	X	G	0.0411979
94	0.329656	0.588	0.593127	0.604788	5	ACAD10	0.840098	X	G	-0.136266
95	0.0678792	0.91364	0.117751	0.117842	5	ACAD11	0.971101	L	G	0.0851409
96	0.372881	0.536477	0.678557	0.696049	5	ACAD8	0.820061	X	G	0.172735
97	0.238156	0.699662	0.420573	0.424718	5	ACAD9	0.885593	X	G	0.0366082
98	-0.512139	0.377672	-0.979691	1.03277	5	ACADL	0.804372	X	G	-0.121478
99	-0.471592	0.422616	-0.88701	0.926293	5	ACADM	0.805779	A	G	-0.244502
100	0.295613	0.62917	0.527766	0.535971	5	ACADS	0.854919	X	G	0.0881301
101	-0.813641	0.0938272	-1.97057	2.42406	5	ACADSB	0.712521	X	G	-0.155616
102	0.896089	0.0395764	2.51495	3.49665	5	ACAN	0.590871	X	G	0.376322
103	-0.346821	0.567433	-0.626701	0.640465	5	ACAP2	0.832122	C	G	0.0400078
104	-0.435764	0.463265	-0.808851	0.838572	5	ACAP3	0.805779	B	G	0.089248
105	-0.319853	0.599805	-0.574147	0.584719	5	ACAT1	0.844805	E	G	0.0949666
106	0.928815	0.0225541	2.85734	4.3416	5	ACAT2	0.538297	D	G	0.224769
107	0.0955564	0.878519	0.166015	0.166269	5	ACBD3	0.95818	A	G	-0.291861
108	0.326486	0.591814	0.586974	0.598274	5	ACBD4	0.841882	D	G	-0.00431032
109	-0.968967	0.00653195	-3.59418	6.78948	5	ACBD5	0.403379	A	G	-0.261246
110	0.482408	0.410513	0.911262	0.953887	5	ACBD6	0.805779	X	G	-0.173212
111	0.710816	0.17836	1.5395	1.75036	5	ACBD7	0.767629	B	G	-0.111234
112	-0.835526	0.0780665	-2.08914	2.63385	5	ACCS	0.690566	A	G	0.0463492
113	0.994009	0.000556093	5.02963	15.7526	5	ACE	0.266262	X	G	0.606508
114	0.642025	0.242825	1.31915	1.45043	5	ACE2	0.767629	C	G	-0.0809607
115	NA	NA	NA	NA	5	ACER1	NA	X	G	-0.0870259
116	0.380292	0.527736	0.693515	0.712195	5	ACER2	0.816347	E	G	0.00793554
117	-0.388336	0.51828	-0.709863	0.729903	5	ACER3	0.814173	X	G	-0.0277634
118	-0.321658	0.597628	-0.577632	0.588399	5	ACKR2	0.844545	X	G	-0.0148469
119	0.977567	0.00401985	3.87899	8.03885	5	ACKR3	0.358826	G	G	0.547773
120	-0.178778	0.773592	-0.313015	0.314722	5	ACKR4	0.917639	A	G	0.0927895
121	0.383386	0.524095	0.699788	0.718982	5	ACLY	0.81498	A	G	-0.000570149
122	-0.773706	0.124745	-1.78314	2.11524	5	ACMSD	0.742571	A	G	0.0943829
123	0.795176	0.107793	1.87989	2.27132	5	ACO1	0.729573	E	G	0.0579142
124	-0.28836	0.638002	-0.514033	0.521612	5	ACO2	0.860058	D	G	-0.229028
125	-0.486268	0.406212	-0.919998	0.963873	5	ACOD1	0.805779	A	G	-0.174641
126	-0.45058	0.446355	-0.840785	0.874197	5	ACOT11	0.805779	G	G	0.361692
127	0.988375	0.00150206	4.453	11.2598	5	ACOT12	0.330056	E	G	0.00421618
128	-0.751665	0.142894	-1.69182	1.97397	5	ACOT13	0.757456	X	G	0.0652142
129	0.994853	0.000442955	5.16139	17.005	5	ACOT7	0.242284	A	G	0.114354
130	0.516649	0.372747	0.990314	1.04516	5	ACOT8	0.803691	X	G	0.0442504
131	-0.703342	0.185088	-1.51361	1.71375	5	ACOT9	0.767629	D	G	0.283906
132	-0.478473	0.414906	-0.902402	0.943785	5	ACOX1	0.805779	A	G	-0.20122
133	-0.230703	0.708886	-0.406915	0.410668	5	ACOX2	0.889286	X	G	0.1242
134	-0.524057	0.364693	-1.00791	1.06576	5	ACOX3	0.799633	A	G	-0.0397452
135	-0.708802	0.180165	-1.53247	1.74039	5	ACP1	0.767629	B	G	0.00190066
136	-0.334176	0.582571	-0.601926	0.614115	5	ACP2	0.838302	A	G	-0.0167031
137	-0.154855	0.803624	-0.270392	0.271491	5	ACP5	0.929533	X	G	-0.0685701
138	0.46469	0.430382	0.8717	0.908967	5	ACP6	0.805779	A	G	0.407371
139	-0.597255	0.287556	-1.19316	1.28979	5	ACRBP	0.776267	E	G	-0.0871341
140	-0.10187	0.87052	-0.177058	0.177367	5	ACSBG1	0.954492	X	G	-0.0833171
141	-0.022328	0.971573	-0.0386796	0.0386829	5	ACSBG2	0.992462	A	G	0.169076
142	0.695797	0.191953	1.48801	1.67793	5	ACSF2	0.767629	G	G	0.497086
143	0.775328	0.123438	1.79016	2.12634	5	ACSF3	0.741763	X	G	0.136625
144	0.401938	0.502372	0.73778	0.760294	5	ACSL1	0.807936	G	G	0.706277
145	-0.447645	0.449694	-0.834417	0.86707	5	ACSL3	0.805779	D	G	0.123574
146	-0.343304	0.571636	-0.619786	0.633098	5	ACSL4	0.832375	B	G	0.12579
147	-0.655151	0.230105	-1.3584	1.502	5	ACSL5	0.767629	X	G	-0.0750479
148	0.297697	0.626636	0.531724	0.540115	5	ACSL6	0.853566	B	G	0.12521
149	-0.674256	0.211933	-1.41769	1.58138	5	ACSS1	0.767629	A	G	-0.120752
150	-0.416006	0.486026	-0.767042	0.792361	5	ACSS2	0.805779	B	G	-0.139485
151	-0.848538	0.0691305	-2.16663	2.77757	5	ACSS3	0.67888	X	G	0.248413
152	-0.303694	0.619354	-0.543142	0.552088	5	ACTA1	0.851939	X	G	-0.0752382
153	-0.512082	0.377734	-0.979557	1.03262	5	ACTA2	0.804372	X	G	-0.136568
154	0.496469	0.394901	0.94329	0.990616	5	ACTB	0.805779	D	G	0.431596
155	-0.363028	0.548142	-0.658818	0.67482	5	ACTC1	0.825398	X	G	-0.0672488
156	0.916629	0.0285334	2.715	3.9717	5	ACTG1	0.554554	D	G	0.132206
157	0.574403	0.311136	1.13288	1.2154	5	ACTG2	0.781883	X	G	-0.090501
158	0.866869	0.0571328	2.2869	3.01174	5	ACTL10	0.65057	A	G	0.109265
159	-0.486374	0.406094	-0.920239	0.964148	5	ACTL6A	0.805779	A	G	-0.0127594
160	-0.0670588	0.914682	-0.116324	0.116411	5	ACTL6B	0.971315	X	G	-0.0335255
161	-0.0545589	0.930568	-0.0945928	0.0946398	5	ACTN1	0.977821	B	G	0.0316416
162	-0.561725	0.32442	-1.10046	1.176	5	ACTN2	0.784698	X	G	-0.10745
163	0.114677	0.854309	0.199504	0.199946	5	ACTR10	0.94886	X	G	-0.0621853
164	0.11049	0.859607	0.192159	0.192553	5	ACTR1A	0.950108	A	G	0.159201
165	-0.655367	0.229897	-1.35905	1.50286	5	ACTR2	0.767629	B	G	0.0564766
166	-0.416791	0.485118	-0.768687	0.79417	5	ACTR3	0.805779	A	G	-0.216615
167	-0.581882	0.303366	-1.15234	1.23925	5	ACTR3B	0.779796	A	G	-0.277153
168	-0.24632	0.689577	-0.435595	0.440201	5	ACTR5	0.882103	A	G	-0.113491
169	-0.707912	0.180966	-1.52938	1.736	5	ACTR6	0.767629	B	G	-0.125982
170	-0.348909	0.564941	-0.630814	0.644853	5	ACTR8	0.830786	B	G	-0.0633977
171	-0.623932	0.260659	-1.26685	1.38287	5	ACVR1	0.767629	B	G	0.134251
172	0.378042	0.530387	0.688963	0.707276	5	ACVR1B	0.816862	D	G	0.100244
173	-0.169011	0.785838	-0.295571	0.297008	5	ACVR1C	0.923009	X	G	-0.0884239
174	0.703361	0.185071	1.51368	1.71385	5	ACVR2A	0.767629	A	G	-0.225947
175	-0.473377	0.420613	-0.89099	0.930809	5	ACVR2B	0.805779	C	G	-0.0771887
176	0.733162	0.158675	1.62039	1.86732	5	ACVRL1	0.765324	D	G	-0.130916
177	0.33789	0.578117	0.609178	0.621815	5	ACYP1	0.836014	A	G	0.0555848
178	-0.335534	0.580943	-0.604574	0.616925	5	ACYP2	0.837448	A	G	-0.232302
179	-0.27405	0.655487	-0.487118	0.493564	5	ADA	0.868821	X	G	-0.0435261
180	0.0673403	0.914325	0.116814	0.116902	5	ADA2	0.971315	A	G	-0.098288
181	-0.199985	0.747079	-0.351116	0.353526	5	ADAD1	0.90511	X	G	-0.0745403
182	-0.147636	0.81271	-0.257595	0.258545	5	ADAL	0.93258	X	G	0.14372
183	0.110536	0.859549	0.192239	0.192634	5	ADAM10	0.950108	A	G	0.194834
184	0.791817	0.110396	1.86418	2.24551	5	ADAM12	0.732418	X	G	0.0899182
185	0.349156	0.564647	0.631301	0.645372	5	ADAM15	0.830726	D	G	-0.140464
186	-0.390597	0.515629	-0.714479	0.734914	5	ADAM17	0.813356	A	G	-0.200446
187	0.874588	0.0522997	2.3422	3.12422	5	ADAM19	0.642911	C	G	0.261662
188	-0.592451	0.292473	-1.18028	1.27377	5	ADAM22	0.777903	A	G	-0.356337
189	0.717802	0.172135	1.56421	1.78567	5	ADAM23	0.767629	F	G	0.387806
190	-0.19923	0.74802	-0.349755	0.352137	5	ADAM28	0.905182	X	G	0.00951405
191	-0.330588	0.58688	-0.594939	0.606707	5	ADAM8	0.839599	A	G	-0.0690709
192	0.555384	0.331118	1.08449	1.15676	5	ADAM9	0.787262	B	G	-0.117922
193	0.375816	0.533012	0.684468	0.702423	5	ADAMTS1	0.818486	I	G	-0.154807
194	-0.399944	0.504697	-0.733666	0.755802	5	ADAMTS10	0.808828	X	G	-0.17108
195	-0.485757	0.406781	-0.918839	0.962546	5	ADAMTS12	0.805779	A	G	-0.0126333
196	-0.626491	0.258117	-1.27413	1.39219	5	ADAMTS13	0.767629	X	G	0.0524884
197	-0.824322	0.0860245	-2.02677	2.52201	5	ADAMTS14	0.698078	C	G	0.125278
198	0.337224	0.578916	0.607875	0.620431	5	ADAMTS15	0.836382	B	G	0.431263
199	-0.655126	0.230129	-1.35832	1.5019	5	ADAMTS17	0.767629	C	G	-0.193632
200	-0.531213	0.356953	-1.02509	1.08599	5	ADAMTS18	0.795977	C	G	-0.0442543
201	0.420187	0.48119	0.775818	0.802022	5	ADAMTS19	0.805779	X	G	-0.0341385
202	-0.79809	0.10555	-1.8937	2.29418	5	ADAMTS2	0.726279	C	G	0.0143791
203	-0.956961	0.0106488	-3.30566	5.71127	5	ADAMTS20	0.456598	C	G	-0.215067
204	0.408789	0.494397	0.75198	0.775827	5	ADAMTS3	0.805779	F	G	-0.156898
205	-0.929922	0.0220338	-2.87141	4.37971	5	ADAMTS5	0.534197	A	G	-0.273751
206	0.762177	0.134147	1.73446	2.03922	5	ADAMTS6	0.750193	A	G	-0.0832448
207	0.346638	0.567652	0.626339	0.64008	5	ADAMTS7	0.832162	C	G	-0.134474
208	-0.960342	0.00942381	-3.37801	5.96563	5	ADAMTS8	0.445939	B	G	0.0714093
209	-0.987529	0.00166873	-4.3918	10.8642	5	ADAMTS9	0.330056	C	G	-0.06657
210	0.884429	0.0463374	2.41751	3.28253	5	ADAMTSL1	0.62327	C	G	0.164429
211	-0.585095	0.300044	-1.16078	1.24964	5	ADAMTSL2	0.779073	A	G	0.00137297
212	-0.748824	0.145285	-1.68056	1.95694	5	ADAMTSL3	0.758163	C	G	0.0728465
213	-0.246089	0.689862	-0.43517	0.439763	5	ADAMTSL5	0.882103	X	G	-0.0938217
214	0.541316	0.346095	1.04965	1.11509	5	ADAP1	0.791194	A	G	0.280127
215	-0.447347	0.450032	-0.833773	0.866349	5	ADAP2	0.805779	C	G	0.121152
216	-0.0786797	0.899925	-0.136559	0.136701	5	ADAR	0.965853	A	G	0.13743
217	0.887609	0.0444599	2.44313	3.33781	5	ADARB1	0.612662	F	G	0.0741258
218	-0.963719	0.00825036	-3.45657	6.25363	5	ADARB2	0.43556	F	G	-0.150762
219	-0.860694	0.0610939	-2.24477	2.92811	5	ADAT1	0.658739	A	G	0.120347
220	-0.703087	0.185319	-1.51274	1.71252	5	ADAT2	0.767629	A	G	0.0315466
221	-0.609543	0.27508	-1.22663	1.33176	5	ADCK1	0.768448	A	G	-0.184335
222	-0.169278	0.785502	-0.296048	0.297492	5	ADCK2	0.923009	A	G	-0.157764
223	-0.543233	0.344045	-1.05435	1.12069	5	ADCY1	0.790646	C	G	-0.0699683
224	0.0686463	0.912666	0.119086	0.11918	5	ADCY2	0.970853	A	G	0.31119
225	-0.0374325	0.952351	-0.0648654	0.0648805	5	ADCY5	0.986041	A	G	-0.268971
226	-0.0349158	0.955553	-0.0605006	0.0605129	5	ADCY6	0.987239	D	G	0.135205
227	-0.284236	0.643033	-0.506252	0.513491	5	ADCY7	0.862316	A	G	-0.0993156
228	-0.791562	0.110594	-1.863	2.24358	5	ADCY8	0.7328	B	G	0.149436
229	0.598389	0.286399	1.19621	1.2936	5	ADCY9	0.775036	A	G	0.465518
230	-0.516031	0.373421	-0.988854	1.04345	5	ADCYAP1	0.804029	C	G	-0.231546
231	-0.81186	0.0951489	-1.96148	2.40845	5	ADCYAP1R1	0.715779	A	G	0.000145626
232	0.420153	0.48123	0.775746	0.801942	5	ADD1	0.805779	X	G	-0.0037984
233	0.665436	0.220271	1.38998	1.54406	5	ADD2	0.767629	D	G	0.00234426
234	-0.671404	0.214619	-1.40867	1.56918	5	ADD3	0.767629	F	G	0.159044
235	-0.56964	0.31611	-1.12062	1.20045	5	ADGB	0.782722	A	G	-0.102938
236	-0.736027	0.1562	-1.63117	1.8832	5	ADGRA1	0.764381	D	G	-0.149505
237	-0.0119053	0.984842	-0.0206216	0.020622	5	ADGRA2	0.995353	X	G	-0.0768177
238	-0.791934	0.110305	-1.86472	2.24641	5	ADGRA3	0.732307	A	G	-0.0699392
239	0.0196327	0.975004	0.0340093	0.0340115	5	ADGRB1	0.994125	X	G	-0.0271025
240	0.24505	0.691144	0.433254	0.437787	5	ADGRB2	0.882662	D	G	-0.236465
241	-0.904356	0.0349936	-2.59051	3.67027	5	ADGRB3	0.574585	B	G	-0.046049
242	-0.625821	0.258781	-1.27222	1.38974	5	ADGRD1	0.767629	X	G	-0.102706
243	-0.422622	0.478378	-0.780947	0.807678	5	ADGRD2	0.805779	X	G	-0.124066
244	-0.411575	0.491162	-0.757783	0.78219	5	ADGRF4	0.805779	X	G	-0.0359428
245	0.539725	0.3478	1.04576	1.11046	5	ADGRF5	0.791981	A	G	-0.220655
246	0.0981668	0.875211	0.170579	0.170855	5	ADGRG1	0.956343	X	G	0.269909
247	0.386088	0.520919	0.705281	0.724934	5	ADGRG2	0.81455	G	G	0.846
248	-0.191568	0.757588	-0.335956	0.338067	5	ADGRG3	0.909662	L	G	-0.0030488
249	-0.977306	0.00409004	-3.86886	7.99088	5	ADGRG6	0.360181	A	G	0.104516
250	-0.321118	0.59828	-0.576588	0.587296	5	ADGRL2	0.844585	A	G	-0.300791
251	-0.37656	0.532134	-0.68597	0.704044	5	ADGRL3	0.818117	B	G	0.139382
252	-0.490648	0.401346	-0.929961	0.975291	5	ADGRL4	0.805779	A	G	-0.208673
253	-0.163489	0.792771	-0.285735	0.287033	5	ADGRV1	0.926251	B	G	0.0499537
254	0.338335	0.577585	0.610047	0.622738	5	ADHFE1	0.835636	A	G	-0.022409
255	-0.505857	0.384557	-0.965005	1.01571	5	ADI1	0.805779	A	G	-0.1073
256	NA	NA	NA	NA	5	ADIG	NA	X	G	-0.110075
257	-0.949507	0.0135163	-3.16403	5.24183	5	ADIPOQ	0.479572	X	G	-0.0787104
258	0.955163	0.0113198	3.26942	5.58767	5	ADIPOR1	0.469267	D	G	0.0802412
259	-0.423351	0.477538	-0.782484	0.809374	5	ADIPOR2	0.805779	I	G	-0.262345
260	-0.254123	0.679958	-0.450013	0.455093	5	ADK	0.878732	A	G	-0.0251377
261	0.682075	0.204616	1.44277	1.6155	5	ADM	0.767629	X	G	0.0110811
262	0.488673	0.403539	0.925462	0.97013	5	ADM2	0.805779	X	G	-0.092201
263	-0.0814884	0.896361	-0.141456	0.141613	5	ADNP	0.964345	A	G	-0.0563102
264	-0.409705	0.493332	-0.753887	0.777918	5	ADNP2	0.805779	A	G	-0.16665
265	0.251337	0.683389	0.44486	0.449767	5	ADO	0.87968	D	G	0.195271
266	-0.510472	0.379496	-0.975781	1.02822	5	ADORA2A	0.804767	A	G	-0.248203
267	0.251946	0.682639	0.445986	0.45093	5	ADORA2B	0.879608	B	G	-0.0468016
268	0.901481	0.0365672	2.56355	3.60753	5	ADORA3	0.583083	A	G	0.224338
269	0.0822484	0.895396	0.142781	0.142943	5	ADPGK	0.964259	A	G	0.344575
270	0.176541	0.776394	0.309015	0.310657	5	ADPRH	0.919	I	G	0.0882956
271	-0.959745	0.00963673	-3.36479	5.91841	5	ADPRHL1	0.448476	A	G	-0.170533
272	0.664821	0.220855	1.38807	1.5415	5	ADPRM	0.767629	X	G	0.160393
273	0.0110417	0.985942	0.0191255	0.0191259	5	ADPRS	0.995463	X	G	0.0263407
274	0.653639	0.231561	1.35382	1.49594	5	ADRA1A	0.767629	C	G	-0.0131523
275	-0.223785	0.717464	-0.394279	0.397693	5	ADRA1B	0.892881	X	G	-0.123549
276	0.494601	0.396966	0.939001	0.985679	5	ADRA1D	0.805779	F	G	-0.141658
277	0.136335	0.826953	0.237618	0.238364	5	ADRA2A	0.937464	F	G	-0.171443
278	0.216802	0.726137	0.381568	0.384662	5	ADRA2C	0.89499	A	G	-0.273057
279	-0.692121	0.195323	-1.47573	1.66087	5	ADRB1	0.767629	A	G	-0.209415
280	0.606311	0.278348	1.21775	1.32058	5	ADRB2	0.77006	D	G	0.0179358
281	-0.578579	0.306792	-1.14371	1.22866	5	ADRB3	0.781447	X	G	0.0153017
282	0.356595	0.555784	0.64602	0.661103	5	ADRM1	0.828019	X	G	0.0662211
283	-0.0221915	0.971747	-0.0384431	0.0384462	5	ADSL	0.992533	A	G	-0.179363
284	0.989601	0.0012709	4.55012	11.9166	5	ADSS1	0.328232	G	G	0.73233
285	0.258127	0.675029	0.457436	0.462772	5	ADSS2	0.876665	C	G	0.140557
286	-0.639986	0.244818	-1.31315	1.44262	5	ADTRP	0.767629	B	G	0.248004
287	-0.413042	0.48946	-0.760843	0.785549	5	AEBP1	0.805779	X	G	-0.141002
288	-0.96994	0.0062281	-3.6222	6.90371	5	AEBP2	0.395052	B	G	0.0892106
289	0.216968	0.72593	0.38187	0.384971	5	AEN	0.89499	A	G	0.0323535
290	-0.84802	0.0694794	-2.16344	2.77153	5	AFAP1	0.680178	X	G	0.134083
291	0.803409	0.101494	1.91938	2.33705	5	AFAP1L1	0.724135	I	G	-0.0554779
292	-0.450308	0.446664	-0.840195	0.873535	5	AFAP1L2	0.805779	C	G	-0.176834
293	-0.221193	0.720682	-0.389555	0.392848	5	AFDN	0.893618	C	G	0.0362046
294	0.0413487	0.947368	0.0716589	0.0716794	5	AFF1	0.984137	A	G	-0.0703773
295	-0.236405	0.701828	-0.41736	0.42141	5	AFF2	0.886619	A	G	0.629066
296	0.800132	0.103987	1.90349	2.31046	5	AFF3	0.724404	A	G	-0.00602419
297	0.394975	0.510502	0.723446	0.744665	5	AFF4	0.811366	A	G	-0.162686
298	-0.501032	0.389864	-0.953812	1.00276	5	AFG1L	0.805779	A	G	-0.0764691
299	-0.781904	0.118185	-1.81909	2.17244	5	AFG3L2	0.7386	B	G	-0.27689
300	0.504787	0.385733	0.962516	1.01283	5	AFMID	0.805779	A	G	0.124417
301	-0.726632	0.164358	-1.59618	1.8319	5	AFTPH	0.767629	A	G	-0.185749
302	-0.53527	0.352584	-1.0349	1.09759	5	AGA	0.793231	A	G	-0.0566947
303	-0.0163295	0.97921	-0.0282861	0.0282873	5	AGAP1	0.994328	A	G	-0.208627
304	-0.255293	0.678517	-0.452181	0.457334	5	AGAP2	0.878418	A	G	-0.294936
305	0.744159	0.149237	1.66231	1.92952	5	AGAP3	0.761601	H	G	0.193845
306	-0.406533	0.49702	-0.747294	0.770696	5	AGBL1	0.806287	B	G	-0.149407
307	-0.427536	0.472715	-0.791336	0.819155	5	AGBL2	0.805779	C	G	0.107156
308	0.513418	0.376274	0.982696	1.03627	5	AGBL5	0.804372	D	G	0.134081
309	0.476724	0.416863	0.898478	0.939318	5	AGFG1	0.805779	A	G	-0.119044
310	0.975511	0.00458345	3.80216	7.68186	5	AGGF1	0.377783	E	G	0.097515
311	-0.107704	0.863132	-0.187276	0.187641	5	AGK	0.951439	D	G	0.139145
312	-0.540541	0.346925	-1.04775	1.11283	5	AGL	0.791648	X	G	0.103401
313	-0.505728	0.384698	-0.964705	1.01536	5	AGMAT	0.805779	X	G	-0.0253546
314	-0.179042	0.773261	-0.313488	0.315203	5	AGMO	0.917518	A	G	-0.217252
315	-0.914061	0.0298499	-2.68757	3.90357	5	AGO2	0.559751	X	G	-0.212832
316	-0.801065	0.103275	-1.90799	2.31797	5	AGO3	0.724404	C	G	-0.327374
317	-0.764291	0.132407	-1.74323	2.0528	5	AGPAT2	0.748264	B	G	0.276005
318	0.508652	0.38149	0.971523	1.02327	5	AGPAT3	0.805473	A	G	0.084537
319	-0.803587	0.101359	-1.92025	2.33851	5	AGPAT4	0.724135	B	G	0.0491105
320	0.735506	0.156649	1.6292	1.88029	5	AGPAT5	0.764627	B	G	-0.107424
321	0.716236	0.173524	1.55863	1.77766	5	AGPS	0.767629	B	G	0.0287291
322	-0.224875	0.716112	-0.396267	0.399733	5	AGR2	0.89204	X	G	0.387654
323	0.217398	0.725397	0.38265	0.38577	5	AGR3	0.894864	C	G	-0.10755
324	-0.887133	0.0447398	-2.43925	3.32938	5	AGRN	0.614114	A	G	-0.173703
325	0.223873	0.717355	0.394439	0.397858	5	AGRP	0.892881	E	G	-0.180337
326	-0.379749	0.528375	-0.692415	0.711006	5	AGT	0.816576	B	G	0.0581662
327	0.837587	0.0766288	2.10103	2.65556	5	AGTPBP1	0.687465	E	G	0.0956706
328	-0.498598	0.392549	-0.948192	0.996267	5	AGTR1	0.805779	X	G	-0.231942
329	0.788539	0.112954	1.84906	2.22085	5	AGTR2	0.7328	X	G	-0.0946015
330	-0.5948	0.290067	-1.18656	1.28157	5	AGTRAP	0.776808	F	G	-0.017989
331	-0.408248	0.495025	-0.750857	0.774597	5	AGXT	0.805779	X	G	-0.0643373
332	-0.132783	0.831434	-0.231353	0.232042	5	AHCTF1	0.938508	D	G	0.143691
333	-0.346921	0.567314	-0.626898	0.640675	5	AHCY	0.832122	A	G	0.465757
334	-0.0257578	0.967208	-0.0446237	0.0446287	5	AHCYL1	0.991027	D	G	-0.265979
335	0.966546	0.0073083	3.52807	6.52689	5	AHCYL2	0.423484	A	G	-0.222536
336	0.0152839	0.980541	0.0264745	0.0264756	5	AHDC1	0.994328	D	G	0.0963977
337	-0.54101	0.346423	-1.0489	1.1142	5	AHI1	0.791194	A	G	0.10052
338	-0.46625	0.428623	-0.87515	0.912865	5	AHNAK	0.805779	X	G	-0.0261953
339	0.695135	0.192559	1.4858	1.67484	5	AHNAK2	0.767629	F	G	-0.0820824
340	-0.420852	0.480421	-0.777219	0.803565	5	AHR	0.805779	A	G	0.00922375
341	-0.252434	0.682038	-0.446888	0.451863	5	AHRR	0.879608	X	G	0.190195
342	-0.623486	0.261103	-1.26559	1.38125	5	AHSA1	0.767629	X	G	-0.162382
343	-0.424856	0.475801	-0.785664	0.812885	5	AHSA2P	0.805779	X	G	-0.104345
344	-0.895152	0.0401075	-2.50674	3.4782	5	AHSG	0.590871	I	G	-0.339755
345	-0.664364	0.221291	-1.38665	1.5396	5	AICDA	0.767629	F	G	0.0657344
346	-0.339197	0.576551	-0.611735	0.624533	5	AIDA	0.835071	B	G	0.395505
347	0.00847632	0.989208	0.0146818	0.014682	5	AIF1L	0.996419	B	G	-0.272637
348	-0.00677688	0.991371	-0.0117381	0.0117382	5	AIFM1	0.997211	D	G	-0.0502042
349	-0.476938	0.416623	-0.898957	0.939864	5	AIFM2	0.805779	X	G	-0.0257126
350	-0.398132	0.506812	-0.729934	0.751732	5	AIFM3	0.810088	F	G	-0.186692
351	0.155993	0.802192	0.272413	0.273537	5	AIG1	0.929462	A	G	0.038906
352	-0.375263	0.533664	-0.683354	0.701221	5	AIMP1	0.818573	H	G	-0.0352289
353	-0.542166	0.345186	-1.05173	1.11757	5	AIMP2	0.791144	A	G	0.0577228
354	0.918065	0.0278053	2.7307	4.01114	5	AIP	0.554554	D	G	0.0295193
355	-0.432849	0.466608	-0.802628	0.831664	5	AJAP1	0.805779	F	G	-0.222792
356	0.865731	0.0578565	2.279	2.99593	5	AK1	0.65057	D	G	-0.148495
357	-0.443403	0.454528	-0.825252	0.856832	5	AK2	0.805779	X	G	0.0034426
358	0.622708	0.261878	1.26339	1.37844	5	AK3	0.767629	E	G	-0.0166927
359	0.998794	5.02953e-05	6.4195	35.2286	5	AK4	0.164617	B	G	0.363716
360	-0.221635	0.720133	-0.390362	0.393675	5	AK5	0.893618	A	G	-0.191899
361	0.384243	0.523087	0.701529	0.720868	5	AK6	0.81455	E	G	0.0964903
362	-0.53481	0.353079	-1.03379	1.09627	5	AK7	0.793231	C	G	-0.112761
363	-0.63974	0.245059	-1.31243	1.44168	5	AK8	0.767629	B	G	0.151423
364	-0.300275	0.623504	-0.536627	0.545254	5	AK9	0.852747	A	G	-0.140446
365	0.460973	0.434577	0.863507	0.899724	5	AKAIN1	0.805779	C	G	0.122237
366	-0.875509	0.0517324	-2.34901	3.13828	5	AKAP1	0.639748	B	G	-0.240612
367	-0.321893	0.597345	-0.578085	0.588877	5	AKAP10	0.844502	B	G	-0.169584
368	-0.78888	0.112686	-1.85063	2.2234	5	AKAP11	0.7328	A	G	-0.231102
369	-0.573924	0.311635	-1.13164	1.21389	5	AKAP12	0.781883	F	G	-0.165445
370	-0.409442	0.493638	-0.75334	0.777317	5	AKAP13	0.805779	A	G	-0.218634
371	-0.705453	0.183181	-1.52087	1.72398	5	AKAP14	0.767629	E	G	-0.0264453
372	-0.322149	0.597037	-0.578579	0.589399	5	AKAP17A	0.844502	A	G	-0.138028
373	-0.145936	0.81485	-0.254587	0.255505	5	AKAP5	0.93258	C	G	-0.0457582
374	-0.303788	0.61924	-0.543323	0.552277	5	AKAP6	0.851939	F	G	0.107851
375	-0.316782	0.603512	-0.568228	0.578475	5	AKAP7	0.84589	C	G	-0.0601078
376	0.0883119	0.887704	0.15336	0.153561	5	AKAP8L	0.96117	X	G	0.223509
377	-0.564207	0.321808	-1.10675	1.18362	5	AKAP9	0.783702	A	G	-0.142764
378	-0.519708	0.369416	-0.997557	1.05363	5	AKIP1	0.802047	K	G	0.0288058
379	0.395943	0.50937	0.725432	0.746828	5	AKIRIN2	0.811179	D	G	0.144554
380	-0.536559	0.351197	-1.03804	1.1013	5	AKNA	0.793231	X	G	0.0311357
381	-0.103468	0.868496	-0.179855	0.180179	5	AKNAD1	0.953782	X	G	0.154777
382	-0.752959	0.141808	-1.69698	1.98181	5	AKR1A1	0.756811	B	G	0.266905
383	-0.699814	0.18829	-1.50158	1.69686	5	AKR1D1	0.767629	B	G	-0.0140538
384	0.435956	0.463045	0.809261	0.839028	5	AKR7A2	0.805779	E	G	0.191297
385	-0.604574	0.280108	-1.213	1.31461	5	AKT1	0.77117	B	G	0.142915
386	-0.345718	0.568752	-0.624529	0.63815	5	AKT3	0.832375	A	G	0.308116
387	-0.170222	0.784318	-0.297731	0.299199	5	AKTIP	0.922799	A	G	0.0298224
388	-0.380263	0.52777	-0.693456	0.712131	5	ALAD	0.816347	B	G	-0.111968
389	0.656952	0.228374	1.36387	1.50925	5	ALAS1	0.767629	D	G	0.0580581
390	-0.555334	0.33117	-1.08437	1.15661	5	ALB	0.787262	X	G	-0.0974972
391	0.962915	0.00852505	3.43724	6.18159	5	ALCAM	0.438259	A	G	-0.0786973
392	-0.102753	0.869402	-0.178603	0.17892	5	ALDH18A1	0.954242	C	G	0.102455
393	0.959163	0.00984561	3.3521	5.87339	5	ALDH1A1	0.451047	X	G	0.283478
394	0.792731	0.109686	1.86843	2.25248	5	ALDH1A2	0.731474	F	G	-0.0026713
395	-0.590018	0.294971	-1.1738	1.26574	5	ALDH1A3	0.777903	X	G	0.0130476
396	-0.265957	0.665409	-0.471997	0.477861	5	ALDH1L2	0.872335	A	G	0.249536
397	-0.234074	0.704712	-0.413086	0.417014	5	ALDH2	0.888194	C	G	-0.0181831
398	0.196791	0.751064	0.345358	0.347651	5	ALDH3A2	0.90693	X	G	-0.158088
399	-0.0104567	0.986686	-0.0181122	0.0181126	5	ALDH4A1	0.995651	B	G	0.123024
400	-0.295556	0.629239	-0.527658	0.535858	5	ALDH5A1	0.854919	B	G	-0.133517
401	-0.535037	0.352834	-1.03434	1.09692	5	ALDH6A1	0.793231	B	G	-0.0237259
402	-0.38425	0.523079	-0.701543	0.720883	5	ALDH7A1	0.81455	X	G	0.191386
403	-0.722892	0.167639	-1.58254	1.8121	5	ALDH8A1	0.767629	A	G	-0.176659
404	-0.285273	0.641768	-0.508206	0.515529	5	ALDH9A1	0.861686	C	G	0.196046
405	0.846502	0.0705058	2.15412	2.754	5	ALDOB	0.682001	A	G	0.284219
406	0.945985	0.0149472	3.10405	5.05378	5	ALDOC	0.492506	A	G	0.0182386
407	0.228142	0.71206	0.402232	0.405857	5	ALG1	0.890438	X	G	0.179081
408	-0.751361	0.143149	-1.69061	1.97213	5	ALG11	0.757521	A	G	-0.255449
409	-0.686413	0.200589	-1.4569	1.63488	5	ALG12	0.767629	B	G	0.267099
410	-0.873601	0.0529101	-2.33496	3.10931	5	ALG14	0.644971	E	G	-0.0860124
411	-0.110169	0.860013	-0.191596	0.191987	5	ALG2	0.950159	X	G	-0.0420407
412	0.373773	0.535424	0.680352	0.697983	5	ALG3	0.819345	D	G	-0.0440964
413	0.0131094	0.983309	0.0227075	0.0227082	5	ALG5	0.994872	B	G	0.392141
414	0.0307648	0.960835	0.0533029	0.0533114	5	ALG6	0.988589	C	G	0.14558
415	-0.62686	0.257751	-1.27518	1.39354	5	ALG8	0.767629	B	G	0.2108
416	-0.377053	0.531553	-0.686965	0.705118	5	ALG9	0.817818	A	G	-0.0382967
417	-0.967619	0.00696076	-3.55676	6.63967	5	ALK	0.410451	X	G	-0.250516
418	0.211579	0.732633	0.372085	0.374954	5	ALKAL1	0.897463	A	G	-0.0622717
419	-0.611257	0.273352	-1.23136	1.33774	5	ALKAL2	0.767629	A	G	-0.0059506
420	-0.757055	0.138388	-1.71348	2.00697	5	ALKBH1	0.753413	A	G	0.131294
421	-0.636259	0.248472	-1.30227	1.42848	5	ALKBH2	0.767629	X	G	0.0782996
422	-0.236564	0.701631	-0.417651	0.42171	5	ALKBH3	0.886485	L	G	0.00901958
423	0.161334	0.795478	0.281902	0.283148	5	ALKBH4	0.927703	A	G	0.303196
424	0.280891	0.647119	0.499955	0.506927	5	ALKBH5	0.864204	A	G	-0.376612
425	0.28932	0.636832	0.515847	0.523507	5	ALKBH7	0.859289	D	G	-0.120989
426	-0.620641	0.263939	-1.25755	1.37099	5	ALKBH8	0.767629	A	G	-0.0181378
427	-0.714028	0.175489	-1.5508	1.76647	5	ALMS1	0.767629	A	G	-0.128026
428	0.780997	0.118905	1.81505	2.16598	5	ALOX5	0.739455	C	G	-0.108644
429	-0.476565	0.417041	-0.898121	0.938912	5	ALOX5AP	0.805779	C	G	0.291372
430	-0.55366	0.332944	-1.08018	1.15158	5	ALPK1	0.787262	F	G	0.106035
431	-0.880404	0.0487487	-2.386	3.21557	5	ALPK3	0.629406	X	G	0.0945413
432	0.94894	0.0137438	3.15409	5.21024	5	ALPL	0.48456	X	G	-0.233861
433	-0.550409	0.336395	-1.07208	1.14186	5	ALS2	0.788152	F	G	0.269128
434	-0.177979	0.774592	-0.311587	0.313271	5	ALS2CL	0.918066	X	G	0.0250515
435	0.0100364	0.987221	0.0173841	0.0173844	5	ALX1	0.995893	X	G	-0.00357215
436	-0.00510901	0.993495	-0.00884914	0.00884918	5	ALX3	0.998165	X	G	0.064826
437	0.892495	0.0416243	2.48386	3.42716	5	ALX4	0.600892	X	G	0.36499
438	0.530837	0.357358	1.02418	1.08492	5	ALYREF	0.79603	D	G	0.123473
439	0.945272	0.0152422	3.09239	5.01791	5	AMACR	0.492818	E	G	0.0654383
440	-0.0311993	0.960282	-0.0540564	0.0540652	5	AMBP	0.988415	A	G	-0.049927
441	-0.365818	0.544834	-0.664391	0.680804	5	AMBRA1	0.823834	A	G	-0.175447
442	0.500261	0.390714	0.95203	1.0007	5	AMD1	0.805779	B	G	0.0862115
443	0.38141	0.526419	0.69578	0.714645	5	AMDHD1	0.816252	X	G	-0.189264
444	-0.300537	0.623185	-0.537127	0.545777	5	AMDHD2	0.852678	A	G	0.177344
445	-0.955206	0.0113039	-3.27026	5.5905	5	AMER1	0.469267	A	G	-0.294071
446	-0.397481	0.507573	-0.728594	0.750272	5	AMER2	0.810207	A	G	-0.00137503
447	-0.796234	0.106977	-1.88488	2.27958	5	AMER3	0.727429	C	G	-0.061767
448	-0.214382	0.729146	-0.377171	0.380159	5	AMFR	0.896336	A	G	-0.249115
449	-0.666725	0.219047	-1.39399	1.54944	5	AMH	0.767629	A	G	-0.268269
450	-0.36342	0.547677	-0.659601	0.67566	5	AMHR2	0.824917	A	G	-0.253406
451	0.960841	0.00924728	3.38919	6.00586	5	AMIGO1	0.445939	D	G	0.0266371
452	-0.959743	0.00963728	-3.36476	5.91828	5	AMIGO2	0.448476	A	G	-0.292983
453	0.42645	0.473966	0.789034	0.81661	5	AMIGO3	0.805779	A	G	-0.174817
454	-0.635229	0.249484	-1.29927	1.4246	5	AMMECR1	0.767629	F	G	-0.102768
455	0.706682	0.182073	1.52511	1.72997	5	AMMECR1L	0.767629	X	G	0.00510473
456	0.184629	0.766266	0.323497	0.325381	5	AMN	0.914656	X	G	0.0593909
457	-0.176956	0.775874	-0.309757	0.311411	5	AMN1	0.918867	E	G	0.148445
458	0.651238	0.233878	1.34657	1.48638	5	AMOT	0.767629	B	G	0.179788
459	-0.201917	0.744669	-0.354603	0.357086	5	AMOTL1	0.904044	B	G	0.0599504
460	0.435579	0.463477	0.808455	0.838132	5	AMOTL2	0.805779	X	G	0.209612
461	-0.663748	0.221877	-1.38475	1.53705	5	AMPD1	0.767629	X	G	0.0555957
462	0.218479	0.724053	0.384616	0.387784	5	AMPD2	0.894507	B	G	0.0178279
463	-0.415569	0.486532	-0.766127	0.791355	5	AMPD3	0.805779	F	G	-0.0965993
464	0.543762	0.343479	1.05565	1.12224	5	AMPH	0.790646	B	G	0.261144
465	0.36882	0.541279	0.670401	0.687266	5	AMT	0.822053	A	G	0.0543169
466	-0.691196	0.196174	-1.47266	1.65662	5	AMZ1	0.767629	C	G	-0.0759347
467	-0.085763	0.890937	-0.148912	0.149095	5	ANAPC1	0.962472	A	G	-0.0741598
468	0.119896	0.84771	0.20867	0.209175	5	ANAPC10	0.946789	A	G	0.141371
469	-0.580309	0.304996	-1.14823	1.2342	5	ANAPC11	0.780844	D	G	0.0850861
470	-0.222276	0.719337	-0.391529	0.394872	5	ANAPC13	0.893618	A	G	-0.113855
471	0.27306	0.656699	0.485265	0.491638	5	ANAPC15	0.869294	B	G	0.112442
472	-0.299024	0.625023	-0.534246	0.542758	5	ANAPC16	0.853166	E	G	0.307024
473	0.688958	0.198236	1.46526	1.6464	5	ANAPC2	0.767629	A	G	0.210333
474	-0.269097	0.661556	-0.477855	0.48394	5	ANAPC4	0.871046	D	G	0.0780471
475	0.147545	0.812823	0.257435	0.258384	5	ANAPC5	0.93258	B	G	-0.0558628
476	0.784246	0.11633	1.82958	2.1893	5	ANAPC7	0.735036	D	G	0.225671
477	-0.748416	0.145629	-1.67896	1.95452	5	ANGEL1	0.758163	A	G	-0.13343
478	-0.481703	0.411298	-0.909673	0.952073	5	ANGEL2	0.805779	B	G	-0.123925
479	0.479429	0.413838	0.904551	0.946232	5	ANGPT1	0.805779	C	G	-0.16543
480	-0.0713577	0.909222	-0.123806	0.123911	5	ANGPT2	0.969606	F	G	-0.0980586
481	0.772723	0.125538	1.77891	2.10856	5	ANGPT4	0.743678	X	G	0.0288831
482	-0.63399	0.250704	-1.29568	1.41994	5	ANGPTL1	0.767629	X	G	0.0820057
483	-0.214872	0.728537	-0.37806	0.38107	5	ANGPTL2	0.896144	X	G	0.000474755
484	-0.201003	0.745809	-0.352954	0.355402	5	ANGPTL3	0.904588	A	G	-0.283983
485	-0.376084	0.532696	-0.685009	0.703007	5	ANGPTL4	0.81848	C	G	-0.0106565
486	0.204664	0.741245	0.359566	0.362154	5	ANGPTL5	0.902177	A	G	0.00152679
487	-0.269314	0.66129	-0.478261	0.484362	5	ANGPTL7	0.870917	C	G	-0.113452
488	-0.304403	0.618494	-0.544496	0.553508	5	ANHX	0.851482	B	G	0.193164
489	0.774621	0.124007	1.7871	2.12149	5	ANK1	0.74189	B	G	-0.166834
490	0.0789795	0.899545	0.137082	0.137225	5	ANK2	0.965823	C	G	0.0644426
491	-0.610897	0.273715	-1.23036	1.33648	5	ANK3	0.767629	A	G	-0.338128
492	-0.932686	0.0207519	-2.90751	4.47881	5	ANKDD1A	0.523812	A	G	-0.154315
493	0.35278	0.560325	0.638461	0.653019	5	ANKDD1B	0.82907	E	G	0.220191
494	-0.498985	0.392121	-0.949085	0.997297	5	ANKEF1	0.805779	A	G	0.160592
495	-0.60385	0.280842	-1.21102	1.31213	5	ANKFN1	0.772002	A	G	-0.211095
496	-0.70345	0.184991	-1.51398	1.71427	5	ANKFY1	0.767629	B	G	0.280712
497	-0.242163	0.694709	-0.427939	0.432306	5	ANKH	0.88348	A	G	-0.257568
498	-0.233222	0.705767	-0.411525	0.415408	5	ANKHD1	0.88835	H	G	0.121932
499	-0.704908	0.183672	-1.51899	1.72133	5	ANKIB1	0.767629	A	G	-0.156815
500	-0.408248	0.495025	-0.750857	0.774597	5	ANKK1	0.805779	A	G	-0.183335
501	-0.184816	0.766031	-0.323832	0.325722	5	ANKLE2	0.914543	C	G	-0.100175
502	-0.829193	0.0825353	-2.05343	2.56941	5	ANKMY2	0.696548	B	G	-0.0775107
503	0.772749	0.125517	1.77902	2.10874	5	ANKRA2	0.743678	E	G	0.214221
504	-0.0637599	0.918873	-0.110585	0.110661	5	ANKRD1	0.973555	X	G	-0.107163
505	-0.812746	0.0944911	-1.96599	2.41619	5	ANKRD10	0.714798	A	G	-0.100919
506	0.418579	0.483049	0.772439	0.7983	5	ANKRD11	0.805779	B	G	0.173533
507	-0.701322	0.18692	-1.50671	1.70405	5	ANKRD12	0.767629	X	G	0.00977067
508	-0.895211	0.0400739	-2.50726	3.47936	5	ANKRD13A	0.590871	A	G	-0.321616
509	0.168187	0.786872	0.294102	0.295517	5	ANKRD13B	0.923339	A	G	0.173558
510	-0.469024	0.425501	-0.881299	0.919822	5	ANKRD13C	0.805779	D	G	-0.0894806
511	0.29835	0.625842	0.532965	0.541416	5	ANKRD13D	0.853255	D	G	-0.131661
512	-0.366303	0.544259	-0.665362	0.681848	5	ANKRD16	0.823813	J	G	-0.127451
513	-0.182498	0.768932	-0.319678	0.321496	5	ANKRD17	0.91578	A	G	-0.346068
514	-0.039143	0.950174	-0.0678324	0.0678497	5	ANKRD2	0.985145	X	G	-0.0491571
515	-0.971268	0.00582098	-3.66193	7.0688	5	ANKRD22	0.395052	X	G	-0.306442
516	0.762677	0.133735	1.73653	2.04242	5	ANKRD24	0.749608	B	G	-0.0371616
517	-0.318521	0.601412	-0.571577	0.582008	5	ANKRD26	0.845058	A	G	-0.141787
518	-0.565857	0.320076	-1.11095	1.18871	5	ANKRD27	0.78326	F	G	-0.178772
519	-0.852294	0.066614	-2.19014	2.82226	5	ANKRD28	0.674097	A	G	-0.208552
520	0.627851	0.256768	1.27801	1.39718	5	ANKRD29	0.767629	C	G	0.265369
521	0.784148	0.116407	1.82914	2.18859	5	ANKRD31	0.735245	E	G	0.412124
522	0.706735	0.182025	1.5253	1.73023	5	ANKRD33	0.767629	X	G	0.0418225
523	0.151095	0.808355	0.263723	0.264743	5	ANKRD33B	0.931382	B	G	-0.0580982
524	0.701329	0.186913	1.50673	1.70409	5	ANKRD34A	0.767629	D	G	0.161557
525	-0.384934	0.522275	-0.702933	0.722389	5	ANKRD34B	0.81455	E	G	-0.0349965
526	0.397703	0.507314	0.72905	0.750769	5	ANKRD34C	0.810092	D	G	0.0824765
527	-0.910332	0.031795	-2.6491	3.80968	5	ANKRD35	0.562799	B	G	-0.10319
528	0.148388	0.811762	0.258927	0.259893	5	ANKRD37	0.932534	A	G	-0.157113
529	0.854123	0.0653996	2.20179	2.84458	5	ANKRD39	0.671236	X	G	0.245297
530	-0.231921	0.707378	-0.409143	0.412958	5	ANKRD40	0.888774	A	G	-0.23596
531	-0.64587	0.23908	-1.33053	1.4653	5	ANKRD42	0.767629	X	G	0.0950691
532	-0.513069	0.376655	-0.981877	1.03532	5	ANKRD44	0.804372	B	G	0.265837
533	-0.357611	0.554576	-0.648036	0.663261	5	ANKRD46	0.828019	B	G	0.18532
534	-0.19794	0.749631	-0.347427	0.349762	5	ANKRD49	0.906258	B	G	0.137135
535	-0.786822	0.114301	-1.84123	2.20813	5	ANKRD50	0.733445	A	G	-0.0498795
536	0.696356	0.191442	1.48989	1.68055	5	ANKRD52	0.767629	D	G	0.140645
537	-0.418306	0.483364	-0.771866	0.797668	5	ANKRD54	0.805779	B	G	-0.0264806
538	0.753835	0.141074	1.70049	1.98715	5	ANKRD55	0.756325	E	G	0.4049
539	-0.816654	0.0916052	-1.98612	2.45091	5	ANKRD6	0.706846	B	G	0.00490124
540	-0.62465	0.259946	-1.26889	1.38548	5	ANKRD66	0.767629	C	G	0.165459
541	0.56346	0.322594	1.10486	1.18132	5	ANKRD9	0.783702	B	G	0.0315487
542	-0.0741548	0.90567	-0.128676	0.128795	5	ANKS1A	0.9683	A	G	0.174154
543	-0.843682	0.0724255	-2.13703	2.72203	5	ANKS1B	0.684744	B	G	0.234965
544	-0.591218	0.293739	-1.17699	1.26969	5	ANKS3	0.777903	D	G	-0.0959984
545	-0.350462	0.563088	-0.63388	0.648124	5	ANKS4B	0.829887	F	G	0.160614
546	-0.576614	0.308833	-1.13861	1.22241	5	ANKS6	0.781478	X	G	-0.0446961
547	-0.953276	0.0120387	-3.23287	5.46545	5	ANKZF1	0.470121	D	G	-0.0965362
548	-0.355398	0.557208	-0.643646	0.658563	5	ANLN	0.82835	I	G	-0.342493
549	0.176529	0.776409	0.308994	0.310636	5	ANO1	0.919	C	G	-0.226015
550	0.475291	0.418468	0.895268	0.935668	5	ANO10	0.805779	B	G	0.401941
551	-0.594674	0.290195	-1.18622	1.28115	5	ANO3	0.776835	A	G	-0.277984
552	-0.653649	0.231551	-1.35385	1.49598	5	ANO4	0.767629	A	G	-0.227747
553	0.391999	0.513986	0.717346	0.738031	5	ANO5	0.812912	A	G	0.574346
554	-0.395079	0.510381	-0.723658	0.744896	5	ANO6	0.811249	E	G	0.22031
555	0.392994	0.512821	0.719382	0.740244	5	ANO8	0.812356	D	G	-0.16445
556	-0.0746367	0.905058	-0.129515	0.129636	5	ANO9	0.9683	X	G	0.117053
557	-0.493337	0.398366	-0.936105	0.982348	5	ANOS1	0.805779	C	G	-0.135271
558	0.851364	0.0672345	2.18427	2.81105	5	ANP32A	0.674097	A	G	-0.137269
559	-0.568358	0.317452	-1.11734	1.19646	5	ANP32E	0.783242	B	G	0.04018
560	0.968146	0.00679198	3.57121	6.69715	5	ANPEP	0.409618	X	G	0.0365221
561	-0.803447	0.101464	-1.91957	2.33737	5	ANTKMT	0.724135	X	G	0.045677
562	0.605369	0.279302	1.21517	1.31734	5	ANTXR1	0.770138	X	G	0.28727
563	-0.49856	0.392591	-0.948104	0.996166	5	ANTXR2	0.805779	B	G	0.391649
564	-0.426926	0.473417	-0.790043	0.817725	5	ANTXRL	0.805779	C	G	-0.0146042
565	0.98317	0.00261435	4.13032	9.32107	5	ANXA1	0.330056	X	G	0.239777
566	0.604397	0.280288	1.21251	1.314	5	ANXA10	0.771403	F	G	0.0544506
567	-0.607953	0.276687	-1.22225	1.32625	5	ANXA11	0.76941	A	G	-0.174616
568	-0.831698	0.0807586	-2.06741	2.5945	5	ANXA13	0.695346	X	G	0.0857577
569	-0.509333	0.380743	-0.973117	1.02513	5	ANXA2	0.805075	C	G	0.181952
570	0.192865	0.755968	0.338289	0.340443	5	ANXA4	0.909225	A	G	0.138755
571	-0.496312	0.395074	-0.94293	0.990202	5	ANXA5	0.805779	X	G	-0.153191
572	0.93909	0.0178796	2.99695	4.73287	5	ANXA6	0.508687	D	G	-0.0643486
573	-0.820637	0.0886932	-2.00704	2.48733	5	ANXA7	0.703333	A	G	0.103991
574	0.642979	0.241894	1.32196	1.4541	5	AOAH	0.767629	X	G	0.0356963
575	-0.0271309	0.96546	-0.0470036	0.0470094	5	AOC1	0.989885	D	G	-0.0675668
576	0.746277	0.147439	1.67056	1.94189	5	AOPEP	0.758523	E	G	0.0312595
577	0.0340515	0.956653	0.0590017	0.0590131	5	AOX1	0.987239	X	G	-0.0269103
578	-0.528276	0.360124	-1.01802	1.07765	5	AP1AR	0.797075	B	G	-0.0395792
579	0.839864	0.0750498	2.11434	2.67999	5	AP1B1	0.686682	D	G	0.0318295
580	-0.763091	0.133394	-1.73824	2.04508	5	AP1G1	0.749608	B	G	0.097605
581	-0.17966	0.772486	-0.314595	0.316328	5	AP1M1	0.917322	B	G	0.0931621
582	-0.257989	0.675199	-0.45718	0.462507	5	AP1M2	0.876665	A	G	-0.170423
583	-0.309104	0.612797	-0.553485	0.562953	5	AP1S1	0.849981	X	G	-0.118675
584	-0.648682	0.236351	-1.33891	1.4763	5	AP1S2	0.767629	I	G	-0.364969
585	-0.730934	0.160608	-1.61207	1.85511	5	AP1S3	0.767629	C	G	-0.102672
586	0.58834	0.296699	1.16935	1.26022	5	AP2A2	0.777932	A	G	0.525704
587	0.438308	0.460351	0.814298	0.844628	5	AP2B1	0.805779	A	G	0.56128
588	0.726225	0.164715	1.59469	1.82973	5	AP2S1	0.767629	A	G	0.276799
589	0.963492	0.00832751	3.45108	6.23308	5	AP3B1	0.436095	E	G	0.0569214
590	0.912643	0.0305847	2.67276	3.8672	5	AP3B2	0.560135	B	G	0.256278
591	0.504552	0.385991	0.961971	1.01219	5	AP3D1	0.805779	A	G	0.0296076
592	0.15556	0.802736	0.271644	0.272759	5	AP3M1	0.929462	X	G	0.20461
593	-0.570083	0.315647	-1.12176	1.20184	5	AP3M2	0.78266	A	G	-0.0350612
594	0.926206	0.0237959	2.825	4.25505	5	AP3S1	0.542577	A	G	0.323585
595	0.12297	0.843825	0.214074	0.214619	5	AP3S2	0.944865	D	G	-0.0362045
596	0.0280489	0.964292	0.0485949	0.0486013	5	AP4B1	0.989562	X	G	-0.128918
597	-0.652702	0.232465	-1.35098	1.4922	5	AP4E1	0.767629	A	G	0.255525
598	-0.880482	0.0487013	-2.38661	3.21684	5	AP4S1	0.629371	X	G	0.0127944
599	0.785003	0.115732	1.83299	2.19481	5	AP5M1	0.734237	X	G	0.157215
600	0.444918	0.4528	0.82852	0.86048	5	AP5S1	0.805779	A	G	0.0541639
601	-0.64375	0.241143	-1.32424	1.45708	5	AP5Z1	0.767629	B	G	0.329018
602	-0.518165	0.371095	-0.9939	1.04935	5	APAF1	0.802807	A	G	0.0729332
603	0.698451	0.18953	1.49696	1.69041	5	APBA1	0.767629	B	G	0.156549
604	0.579904	0.305416	1.14717	1.2329	5	APBA2	0.781365	A	G	0.296195
605	-0.139791	0.822594	-0.243721	0.244526	5	APBA3	0.935181	X	G	0.147995
606	0.687805	0.199301	1.46147	1.64116	5	APBB1	0.767629	B	G	-0.0627596
607	-0.536865	0.350869	-1.03878	1.10218	5	APBB1IP	0.793231	A	G	-0.121228
608	-0.428343	0.471787	-0.793046	0.821047	5	APBB2	0.805779	B	G	0.201667
609	0.926616	0.0235991	2.83001	4.26838	5	APBB3	0.542577	A	G	0.408165
610	-0.447842	0.44947	-0.834844	0.867547	5	APC	0.805779	D	G	-0.103788
611	0.554503	0.33205	1.08229	1.15411	5	APC2	0.787262	B	G	-0.1014
612	-0.686657	0.200363	-1.4577	1.63598	5	APCDD1	0.767629	C	G	-0.110155
613	0.840702	0.0744713	2.11927	2.68909	5	APCDD1L	0.685961	X	G	0.247912
614	-0.216565	0.726432	-0.381137	0.38422	5	APELA	0.895241	F	G	-0.0778662
615	0.314766	0.605948	0.564348	0.574387	5	APH1A	0.846872	D	G	0.119082
616	0.00663737	0.991549	0.0114964	0.0114965	5	API5	0.997248	B	G	0.0920443
617	-0.556302	0.330146	-1.0868	1.15953	5	APIP	0.787202	A	G	0.0302766
618	0.390664	0.51555	0.714616	0.735064	5	APLF	0.813356	H	G	0.113937
619	0.503172	0.387508	0.958767	1.00849	5	APLN	0.805779	X	G	-0.134548
620	0.821861	0.0878039	2.01355	2.49874	5	APLNR	0.70236	X	G	-0.0114724
621	-0.426581	0.473814	-0.789313	0.816917	5	APLP2	0.805779	A	G	0.0865359
622	0.741886	0.151174	1.65352	1.91638	5	APMAP	0.76293	B	G	0.112843
623	-0.906998	0.0335673	-2.61598	3.73032	5	APOA1	0.570792	C	G	-0.056216
624	-0.25608	0.677548	-0.453639	0.458843	5	APOA4	0.8778	X	G	-0.0836587
625	-0.408371	0.494883	-0.751111	0.774875	5	APOB	0.805779	C	G	0.241802
626	-0.218189	0.724413	-0.384089	0.387245	5	APOBEC2	0.894524	L	G	-0.0603063
627	-0.757762	0.137801	-1.71635	2.01137	5	APOC3	0.753413	X	G	-0.0528408
628	0.7	0.18812	1.50221	1.69775	5	APOD	0.767629	A	G	-0.293728
629	-0.83452	0.078771	-2.08339	2.6234	5	APOF	0.69073	C	G	0.0652943
630	-0.0115595	0.985282	-0.0200226	0.020023	5	APOH	0.995463	I	G	-0.410815
631	-0.110429	0.859683	-0.192052	0.192446	5	APOLD1	0.950108	A	G	-0.133071
632	-0.146094	0.814651	-0.254866	0.255786	5	APOO	0.93258	B	G	-0.38442
633	-0.704702	0.183859	-1.51828	1.72033	5	APOOL	0.767629	A	G	-0.239927
634	-0.372965	0.536378	-0.678726	0.69623	5	APP	0.819974	A	G	0.152332
635	-0.385367	0.521766	-0.703814	0.723343	5	APPBP2	0.81455	B	G	-0.0668169
636	-0.334281	0.582445	-0.60213	0.614332	5	APPL1	0.838199	D	G	-0.122845
637	0.0351676	0.955232	0.0609373	0.0609498	5	APPL2	0.9872	C	G	0.0281869
638	0.148537	0.811574	0.259192	0.26016	5	APRT	0.932534	A	G	0.103362
639	0.927216	0.0233124	2.83739	4.28804	5	APTX	0.542251	E	G	0.267373
640	-0.615976	0.268608	-1.24447	1.35434	5	AQP1	0.767629	B	G	-0.00694215
641	-0.366981	0.543456	-0.666717	0.683304	5	AQP10	0.823233	X	G	-0.0192319
642	0.645632	0.239311	1.32982	1.46438	5	AQP11	0.767629	A	G	0.343195
643	NA	NA	NA	NA	5	AQP2	NA	X	G	-0.0575728
644	-0.704152	0.184356	-1.51639	1.71766	5	AQP3	0.767629	A	G	-0.206797
645	-0.18808	0.761949	-0.329688	0.331683	5	AQP4	0.911829	X	G	0.103146
646	-0.408248	0.495025	-0.750857	0.774597	5	AQP5	0.805779	X	G	0.0135579
647	NA	NA	NA	NA	5	AQP8	NA	X	G	-0.0859848
648	0.363506	0.547575	0.659772	0.675843	5	AQP9	0.824891	F	G	-0.0360129
649	-0.926886	0.0234702	-2.83332	4.27718	5	AQR	0.542577	A	G	-0.319334
650	0.961469	0.00902667	3.40346	6.05757	5	AR	0.445939	G	G	0.666925
651	0.345195	0.569375	0.623502	0.637055	5	ARAP1	0.832375	X	G	0.0191128
652	-0.712102	0.177209	-1.54401	1.75679	5	ARAP2	0.767629	X	G	0.185245
653	0.858594	0.0624598	2.23083	2.90084	5	ARAP3	0.662783	D	G	-0.0468813
654	-0.458914	0.436904	-0.858984	0.894631	5	ARC	0.805779	X	G	-0.162909
655	-0.844806	0.0716589	-2.1438	2.73467	5	ARCN1	0.684744	B	G	-0.0762948
656	-0.225773	0.714998	-0.397906	0.401415	5	AREG	0.89149	A	G	-0.19213
657	-0.871704	0.0540899	-2.32117	3.08108	5	AREL1	0.646834	A	G	-0.309373
658	-0.0812007	0.896726	-0.140954	0.14111	5	ARF1	0.964345	B	G	0.110804
659	0.327005	0.591188	0.587981	0.59934	5	ARF3	0.84138	D	G	0.0174933
660	0.783597	0.116843	1.82666	2.18461	5	ARF4	0.735674	A	G	0.418315
661	0.715049	0.17458	1.55441	1.77163	5	ARF6	0.767629	D	G	-0.0167284
662	-0.853022	0.0661302	-2.19476	2.83109	5	ARFGAP1	0.67295	B	G	0.0556551
663	-0.965724	0.00757845	-3.50668	6.44399	5	ARFGAP2	0.428306	B	G	-0.123495
664	-0.677542	0.208849	-1.42817	1.5956	5	ARFGAP3	0.767629	A	G	-0.0940889
665	-0.221891	0.719816	-0.390827	0.394152	5	ARFGEF1	0.893618	F	G	-0.00763554
666	-0.421761	0.479372	-0.779132	0.805675	5	ARFGEF2	0.805779	A	G	-0.235014
667	0.0688295	0.912433	0.119405	0.1195	5	ARFGEF3	0.970773	F	G	0.165853
668	-0.417287	0.484543	-0.769728	0.795315	5	ARFIP1	0.805779	A	G	0.0597525
669	0.0511668	0.934881	0.088701	0.0887397	5	ARFIP2	0.979888	D	G	-0.0298951
670	-0.686006	0.200966	-1.45557	1.63304	5	ARFRP1	0.767629	B	G	0.0100712
671	-0.132166	0.832213	-0.230265	0.230944	5	ARG2	0.939036	C	G	0.0810042
672	-0.492154	0.399676	-0.933401	0.97924	5	ARGLU1	0.805779	A	G	0.0664298
673	-0.452977	0.443632	-0.846003	0.880045	5	ARHGAP1	0.805779	X	G	0.037781
674	-0.708996	0.179991	-1.53315	1.74134	5	ARHGAP10	0.767629	A	G	-0.110912
675	-0.141048	0.821009	-0.245943	0.24677	5	ARHGAP12	0.934348	A	G	-0.000598139
676	-0.394767	0.510746	-0.723018	0.744199	5	ARHGAP15	0.811388	B	G	0.0573993
677	-0.453731	0.442777	-0.847645	0.881888	5	ARHGAP17	0.805779	X	G	-0.11464
678	0.290089	0.635894	0.517301	0.525026	5	ARHGAP18	0.85891	B	G	0.56257
679	0.529694	0.358593	1.02142	1.08167	5	ARHGAP19	0.796399	B	G	0.0555131
680	-0.270714	0.659574	-0.480876	0.487078	5	ARHGAP20	0.869952	A	G	-0.20356
681	-0.476376	0.417252	-0.897697	0.93843	5	ARHGAP21	0.805779	A	G	0.224541
682	-0.702932	0.185459	-1.51221	1.71178	5	ARHGAP22	0.767629	F	G	-0.0458535
683	0.648262	0.236758	1.33765	1.47465	5	ARHGAP23	0.767629	B	G	0.1075
684	0.484359	0.408338	0.915672	0.958925	5	ARHGAP24	0.805779	G	G	0.638721
685	-0.396873	0.508283	-0.727344	0.74891	5	ARHGAP25	0.81061	C	G	0.155456
686	0.471218	0.423036	0.886178	0.925349	5	ARHGAP26	0.805779	D	G	0.250671
687	0.574884	0.310635	1.13413	1.21692	5	ARHGAP27	0.781883	B	G	-0.0145967
688	-0.554486	0.332069	-1.08225	1.15406	5	ARHGAP28	0.787262	X	G	-0.0262141
689	-0.4717	0.422494	-0.887251	0.926567	5	ARHGAP29	0.805779	A	G	-0.147075
690	-0.0708324	0.909889	-0.122891	0.122994	5	ARHGAP30	0.969841	X	G	0.0730081
691	0.186911	0.763411	0.32759	0.329547	5	ARHGAP31	0.912746	A	G	-0.300732
692	-0.336769	0.579462	-0.606986	0.619486	5	ARHGAP32	0.836442	A	G	-0.168492
693	0.276911	0.651986	0.492479	0.499142	5	ARHGAP35	0.866813	D	G	-0.0629769
694	0.76261	0.13379	1.73625	2.04199	5	ARHGAP36	0.749608	B	G	0.656014
695	-0.0546447	0.930459	-0.0947418	0.0947891	5	ARHGAP39	0.977811	X	G	-0.213494
696	0.250934	0.683887	0.444113	0.448996	5	ARHGAP40	0.879859	A	G	-0.117526
697	-0.109424	0.860955	-0.19029	0.190673	5	ARHGAP42	0.950624	A	G	0.333685
698	0.851067	0.0674328	2.1824	2.80749	5	ARHGAP44	0.674097	B	G	0.106275
699	-0.555379	0.331122	-1.08448	1.15674	5	ARHGAP45	0.787262	X	G	-0.0453204
700	-0.00253984	0.996766	-0.00439913	0.00439914	5	ARHGAP5	0.998852	B	G	-0.29792
701	0.606089	0.278572	1.21714	1.31982	5	ARHGAP6	0.77006	A	G	-0.163525
702	0.888691	0.0438272	2.452	3.35711	5	ARHGDIA	0.61041	X	G	0.110344
703	-0.903894	0.0352451	-2.58613	3.66	5	ARHGDIB	0.576665	B	G	-0.233018
704	0.896846	0.0391495	2.52163	3.51172	5	ARHGDIG	0.590193	C	G	0.0992653
705	-0.220048	0.722104	-0.387471	0.390711	5	ARHGEF10	0.893778	A	G	-0.191816
706	0.605677	0.27899	1.21601	1.3184	5	ARHGEF10L	0.770138	B	G	-0.103062
707	0.4156	0.486496	0.766192	0.791426	5	ARHGEF11	0.805779	B	G	-0.15748
708	-0.760194	0.135784	-1.72629	2.02663	5	ARHGEF12	0.751289	X	G	0.256396
709	-0.162987	0.793401	-0.284842	0.286128	5	ARHGEF16	0.926572	X	G	-0.0916865
710	0.146724	0.813857	0.255982	0.256914	5	ARHGEF17	0.93258	D	G	-0.0190964
711	-0.920411	0.0266295	-2.75692	4.07772	5	ARHGEF18	0.549317	B	G	0.319492
712	0.13644	0.82682	0.237803	0.238551	5	ARHGEF2	0.937423	D	G	-0.149417
713	-0.272227	0.65772	-0.483705	0.490017	5	ARHGEF26	0.869704	C	G	-0.00514239
714	0.917694	0.0279929	2.72662	4.00085	5	ARHGEF28	0.554554	E	G	-0.20357
715	-0.313972	0.606907	-0.562823	0.57278	5	ARHGEF3	0.847286	F	G	-0.317203
716	0.253625	0.680571	0.449092	0.454141	5	ARHGEF33	0.879048	X	G	-0.054637
717	-0.077308	0.901667	-0.134169	0.134303	5	ARHGEF37	0.966958	X	G	-0.126478
718	-0.0127666	0.983746	-0.0221136	0.0221142	5	ARHGEF38	0.994872	A	G	-0.132677
719	-0.035594	0.95469	-0.0616766	0.0616896	5	ARHGEF39	0.987111	E	G	0.14914
720	-0.819627	0.0894289	-2.0017	2.47799	5	ARHGEF4	0.70554	B	G	-0.146402
721	-0.760717	0.135352	-1.72844	2.02994	5	ARHGEF5	0.750945	A	G	-0.33865
722	-0.506318	0.38405	-0.96608	1.01696	5	ARHGEF6	0.805779	B	G	0.357338
723	-0.837821	0.0764657	-2.1024	2.65805	5	ARHGEF7	0.687465	B	G	-0.191758
724	-0.639628	0.245169	-1.3121	1.44125	5	ARHGEF9	0.767629	A	G	-0.317701
725	0.42529	0.475302	0.78658	0.813897	5	ARID1A	0.805779	B	G	-0.202194
726	-0.38593	0.521105	-0.70496	0.724586	5	ARID1B	0.81455	A	G	-0.00793562
727	-0.573918	0.311642	-1.13163	1.21387	5	ARID2	0.781883	A	G	0.0279773
728	0.498608	0.392538	0.948214	0.996293	5	ARID3A	0.805779	A	G	-0.189413
729	0.472085	0.422062	0.888108	0.927539	5	ARID3B	0.805779	A	G	-0.0449859
730	0.45788	0.438074	0.856717	0.89208	5	ARID3C	0.805779	X	G	-0.00114994
731	-0.841609	0.073847	-2.12464	2.69902	5	ARID4A	0.685961	A	G	-0.129741
732	-0.327088	0.591089	-0.588141	0.599509	5	ARID4B	0.84138	A	G	0.120103
733	0.2525	0.681956	0.44701	0.451989	5	ARID5A	0.879608	A	G	0.0491222
734	-0.749639	0.144597	-1.68378	1.9618	5	ARID5B	0.758163	X	G	0.0651423
735	0.455845	0.440379	0.852262	0.887071	5	ARIH1	0.805779	D	G	0.080905
736	-0.722549	0.167941	-1.58129	1.8103	5	ARIH2	0.767629	B	G	-0.219553
737	0.797256	0.106191	1.88973	2.28759	5	ARL1	0.726508	C	G	0.173913
738	-0.612566	0.272034	-1.23498	1.34232	5	ARL11	0.767629	F	G	-0.0703526
739	-0.232569	0.706576	-0.410329	0.414178	5	ARL13A	0.888559	X	G	-0.149531
740	-0.504973	0.385528	-0.96295	1.01333	5	ARL13B	0.805779	A	G	-0.197819
741	-0.320074	0.599539	-0.574572	0.585169	5	ARL14	0.844805	C	G	0.127912
742	-0.572772	0.312837	-1.12867	1.21026	5	ARL14EP	0.781883	A	G	0.0105079
743	0.445255	0.452416	0.829248	0.861293	5	ARL14EPL	0.805779	A	G	0.374186
744	-0.221979	0.719706	-0.390988	0.394317	5	ARL15	0.893618	E	G	0.194723
745	0.344401	0.570325	0.62194	0.635392	5	ARL16	0.832375	B	G	0.0701616
746	-0.969394	0.00639788	-3.60638	6.839	5	ARL2BP	0.40225	A	G	-0.116494
747	-0.553143	0.333492	-1.07889	1.15003	5	ARL3	0.787262	D	G	-0.116886
748	-0.856676	0.0637162	-2.21827	2.8764	5	ARL4A	0.667694	A	G	-0.196984
749	0.019199	0.975557	0.0332577	0.0332597	5	ARL4C	0.99416	C	G	-0.118855
750	-0.64291	0.241962	-1.32176	1.45384	5	ARL5A	0.767629	B	G	0.11541
751	-0.787298	0.113927	-1.84339	2.21165	5	ARL5B	0.733297	B	G	-0.0227254
752	-0.193163	0.755596	-0.338825	0.34099	5	ARL6	0.909111	I	G	0.241211
753	-0.639732	0.245067	-1.31241	1.44165	5	ARL6IP1	0.767629	F	G	0.0501835
754	-0.0615208	0.921719	-0.106692	0.106759	5	ARL6IP4	0.974466	B	G	-0.047825
755	-0.307973	0.614166	-0.55132	0.560677	5	ARL6IP5	0.850114	A	G	-0.21404
756	0.835072	0.0783845	2.08654	2.62912	5	ARL8A	0.690566	D	G	-0.00750715
757	0.869371	0.0555514	2.30449	3.04718	5	ARL8B	0.647988	A	G	0.348693
758	-0.316135	0.604294	-0.566981	0.577162	5	ARL9	0.846321	X	G	0.259758
759	-0.260975	0.671527	-0.462726	0.46825	5	ARMC1	0.875312	B	G	0.0614023
760	0.358693	0.553289	0.650186	0.665564	5	ARMC10	0.827767	K	G	-0.201253
761	0.455743	0.440495	0.852039	0.886822	5	ARMC2	0.805779	X	G	0.502646
762	0.15342	0.805428	0.267846	0.268915	5	ARMC3	0.930138	A	G	0.408685
763	-0.516109	0.373336	-0.989038	1.04367	5	ARMC4	0.804029	C	G	0.155497
764	0.703963	0.184527	1.51574	1.71675	5	ARMC6	0.767629	A	G	0.408904
765	0.665622	0.220094	1.39056	1.54483	5	ARMC7	0.767629	X	G	0.110098
766	0.496151	0.395252	0.942559	0.989775	5	ARMC8	0.805779	A	G	-0.0419555
767	-0.75675	0.138642	-1.71225	2.00508	5	ARMC9	0.753413	X	G	0.122642
768	-0.00264099	0.996637	-0.00457435	0.00457435	5	ARMH3	0.998824	B	G	0.072781
769	-0.97342	0.00518127	-3.73027	7.36157	5	ARMH4	0.395052	F	G	-0.378557
770	-0.300649	0.62305	-0.537339	0.546	5	ARMT1	0.852645	B	G	0.482231
771	-0.273655	0.65597	-0.486379	0.492796	5	ARNT	0.868953	A	G	-0.0456223
772	0.166408	0.789105	0.290932	0.292302	5	ARNT2	0.924532	A	G	0.0586025
773	0.0633336	0.919415	0.109844	0.109918	5	ARNTL	0.973715	B	G	-0.0226635
774	-0.498089	0.393111	-0.947018	0.994913	5	ARNTL2	0.805779	X	G	0.485469
775	-0.0346691	0.955867	-0.0600728	0.0600848	5	ARPC1A	0.987239	A	G	-0.288987
776	-0.312315	0.608911	-0.55964	0.569429	5	ARPC1B	0.848233	C	G	-0.0974155
777	-0.500882	0.39003	-0.953463	1.00235	5	ARPC2	0.805779	A	G	-0.280419
778	0.564016	0.322009	1.10627	1.18303	5	ARPC3	0.783702	D	G	0.0363339
779	-0.298408	0.625771	-0.533076	0.541532	5	ARPC4	0.853255	H	G	0.287184
780	-0.639626	0.245171	-1.3121	1.44124	5	ARPC5	0.767629	B	G	0.0347263
781	-0.359577	0.552239	-0.651943	0.667447	5	ARPC5L	0.826964	A	G	0.121348
782	-0.626004	0.258599	-1.27274	1.39041	5	ARPP19	0.767629	A	G	-0.309735
783	0.0169776	0.978384	0.0294089	0.0294103	5	ARPP21	0.994328	B	G	0.124604
784	0.567005	0.318871	1.11388	1.19226	5	ARR3	0.783242	X	G	0.235927
785	-0.0841752	0.892952	-0.146141	0.146315	5	ARRB1	0.963133	D	G	0.0478762
786	0.0174347	0.977803	0.0302009	0.0302024	5	ARRDC1	0.994328	A	G	-0.342114
787	-0.868244	0.056262	-2.29653	3.0311	5	ARRDC2	0.647988	B	G	-0.0550682
788	0.831769	0.0807082	2.06781	2.59523	5	ARRDC3	0.695346	E	G	0.262967
789	-0.0452346	0.942425	-0.0784022	0.0784289	5	ARRDC4	0.982838	A	G	-0.12013
790	-0.0017932	0.997717	-0.00310593	0.00310593	5	ARSA	0.999309	B	G	-0.236271
791	0.647942	0.237068	1.3367	1.47339	5	ARSB	0.767629	E	G	0.487465
792	0.362234	0.549084	0.657235	0.673121	5	ARSG	0.826151	C	G	0.0360334
793	-0.443601	0.454303	-0.825678	0.857308	5	ARSI	0.805779	F	G	-0.110976
794	-0.322839	0.596205	-0.579914	0.590809	5	ARSJ	0.844139	X	G	-0.0456524
795	0.927041	0.0233959	2.83523	4.28228	5	ARSK	0.542577	E	G	0.0051386
796	-0.191496	0.757678	-0.335828	0.337936	5	ARTN	0.909713	X	G	-0.0418439
797	-0.459942	0.435742	-0.86124	0.897171	5	ARV1	0.805779	B	G	0.185206
798	-0.887455	0.0445504	-2.44187	3.33508	5	ARVCF	0.612662	A	G	-0.225805
799	0.0574315	0.926916	0.0995838	0.0996387	5	ARX	0.976208	A	G	-0.13273
800	-0.342006	0.573188	-0.617239	0.630386	5	AS3MT	0.832873	X	G	0.0443631
801	0.291979	0.633592	0.520878	0.528764	5	ASAH1	0.857586	A	G	0.435822
802	-0.33939	0.576321	-0.612111	0.624932	5	ASAP1	0.834918	A	G	-0.189675
803	0.105895	0.865423	0.184106	0.184453	5	ASAP2	0.952324	A	G	-0.0275451
804	0.157139	0.800751	0.274447	0.275597	5	ASAP3	0.929462	C	G	-0.0872388
805	-0.0524449	0.933256	-0.0909206	0.0909624	5	ASB1	0.979335	B	G	-0.0404637
806	0.778132	0.12119	1.8024	2.14578	5	ASB10	0.741039	G	G	0.523671
807	0.788539	0.112954	1.84906	2.22085	5	ASB11	0.7328	X	G	-0.0291417
808	0.981958	0.00290133	4.06955	8.99412	5	ASB12	0.330056	X	G	-0.110146
809	0.591256	0.2937	1.17709	1.26982	5	ASB13	0.777903	X	G	0.0657979
810	-0.450378	0.446584	-0.840347	0.873706	5	ASB14	0.805779	X	G	0.176843
811	0.856425	0.0638812	2.21663	2.87323	5	ASB15	0.667808	G	G	0.612338
812	-0.243782	0.69271	-0.430919	0.435378	5	ASB16	0.882991	X	G	-0.0997356
813	-0.807669	0.0982794	-1.9404	2.37252	5	ASB2	0.718957	F	G	-0.0775013
814	-0.256675	0.676816	-0.454743	0.459985	5	ASB3	0.877647	X	G	0.060349
815	-0.0455808	0.941985	-0.079003	0.0790304	5	ASB4	0.982682	X	G	0.126411
816	0.523459	0.365341	1.00648	1.06409	5	ASB5	0.800376	A	G	0.235371
817	0.457084	0.438975	0.854973	0.890119	5	ASB6	0.805779	X	G	0.254273
818	-0.823026	0.0869597	-2.01979	2.50971	5	ASB7	0.700811	D	G	-0.36348
819	0.525661	0.362955	1.01174	1.07027	5	ASB8	0.798533	D	G	0.0169498
820	-0.346109	0.568283	-0.6253	0.638971	5	ASCC1	0.832375	E	G	0.106493
821	-0.473401	0.420586	-0.891043	0.930869	5	ASCC2	0.805779	B	G	0.0746583
822	-0.591899	0.293039	-1.17881	1.27194	5	ASCC3	0.777903	A	G	-0.159909
823	-0.384205	0.523132	-0.701452	0.720784	5	ASCL1	0.81455	C	G	0.141508
824	-0.666176	0.219568	-1.39229	1.54714	5	ASCL2	0.767629	X	G	0.015103
825	-0.613974	0.270618	-1.23889	1.34727	5	ASCL3	0.767629	X	G	-0.144381
826	-0.0971637	0.876482	-0.168825	0.169093	5	ASCL4	0.957199	X	G	0.134953
827	0.0627829	0.920115	0.108886	0.108958	5	ASDURF	0.973852	E	G	0.155603
828	-0.182706	0.768672	-0.32005	0.321874	5	ASF1A	0.915636	X	G	0.0795503
829	0.06381	0.91881	0.110672	0.110748	5	ASH1L	0.97354	A	G	-0.130067
830	0.202981	0.743342	0.356525	0.359048	5	ASH2L	0.903648	D	G	0.0742885
831	0.00405907	0.994832	0.00703055	0.00703057	5	ASIC1	0.998446	D	G	-0.128975
832	-0.0856626	0.891065	-0.148736	0.148919	5	ASIC3	0.962472	A	G	0.0764027
833	-0.651798	0.233337	-1.34826	1.4886	5	ASIC4	0.767629	A	G	-0.32065
834	0.604228	0.280459	1.21205	1.31343	5	ASIC5	0.771578	X	G	-0.0292006
835	-0.504834	0.385681	-0.962626	1.01295	5	ASIP	0.805779	J	G	-0.121705
836	0.588816	0.296208	1.17061	1.26178	5	ASMT	0.777903	C	G	-0.0705274
837	-0.64253	0.242333	-1.32064	1.45237	5	ASMTL	0.767629	A	G	-0.124373
838	0.121821	0.845277	0.212053	0.212583	5	ASNS	0.94561	D	G	0.1177
839	0.211537	0.732685	0.372009	0.374876	5	ASPA	0.897463	X	G	0.16042
840	-0.429525	0.470427	-0.795555	0.823824	5	ASPDH	0.805779	X	G	-0.0790706
841	0.297593	0.626763	0.531525	0.539907	5	ASPG	0.853566	B	G	-0.00803808
842	-0.747442	0.146453	-1.67512	1.94875	5	ASPH	0.758163	C	G	0.2993
843	-0.252825	0.681557	-0.44761	0.452609	5	ASPHD2	0.879518	X	G	-0.185225
844	0.213453	0.730301	0.375485	0.378433	5	ASPM	0.896858	X	G	0.283242
845	0.780282	0.119474	1.81188	2.1609	5	ASPN	0.740076	X	G	-0.0983597
846	-0.448064	0.449217	-0.835325	0.868085	5	ASPSCR1	0.805779	A	G	-0.103945
847	-0.645362	0.239575	-1.32902	1.46332	5	ASRGL1	0.767629	B	G	0.124946
848	0.565275	0.320687	1.10947	1.18691	5	ASS1	0.783289	A	G	0.100276
849	0.184028	0.767018	0.322418	0.324284	5	ASTE1	0.915122	A	G	-0.0402135
850	-0.236413	0.701817	-0.417375	0.421426	5	ASTN1	0.886619	A	G	-0.0704755
851	0.839331	0.0754186	2.11121	2.67422	5	ASTN2	0.686682	B	G	-0.201117
852	-0.40472	0.49913	-0.743535	0.766583	5	ASXL1	0.807021	B	G	0.225483
853	0.839272	0.0754595	2.11086	2.67359	5	ASXL2	0.686682	X	G	-0.036752
854	-0.650706	0.234392	-1.34498	1.48428	5	ASXL3	0.767629	C	G	0.271606
855	0.0457469	0.941774	0.0792914	0.0793191	5	ASZ1	0.982643	K	G	0.276904
856	0.893775	0.0408912	2.49482	3.45153	5	ATAD1	0.596155	A	G	0.50516
857	0.611075	0.273535	1.23086	1.3371	5	ATAD2	0.767629	A	G	0.0306517
858	-0.79054	0.11139	-1.85827	2.23585	5	ATAD2B	0.7328	A	G	0.0112457
859	0.489658	0.402445	0.927704	0.972701	5	ATAD3A	0.805779	D	G	-0.059082
860	0.0720267	0.908372	0.12497	0.125079	5	ATAD5	0.969433	A	G	0.268
861	0.279142	0.649256	0.496668	0.503503	5	ATAT1	0.865483	D	G	0.181677
862	0.0486345	0.938101	0.084304	0.0843373	5	ATCAY	0.981105	A	G	0.154045
863	0.341669	0.573593	0.616576	0.629681	5	ATE1	0.833275	F	G	0.112684
864	-0.75154	0.142998	-1.69132	1.97322	5	ATF1	0.757456	B	G	-0.138769
865	-0.80802	0.098016	-1.94215	2.37549	5	ATF2	0.718145	B	G	0.188987
866	-0.470671	0.42365	-0.884959	0.923968	5	ATF3	0.805779	F	G	0.134694
867	-0.389959	0.516376	-0.713175	0.733499	5	ATF4	0.813502	D	G	0.0421686
868	0.746948	0.146871	1.67319	1.94583	5	ATF6	0.758523	D	G	0.0252192
869	-0.428669	0.471412	-0.793738	0.821813	5	ATF7IP	0.805779	A	G	0.109351
870	0.933295	0.0204729	2.91565	4.50143	5	ATG10	0.523102	F	G	-0.128539
871	-0.126604	0.839235	-0.220467	0.221063	5	ATG101	0.942358	D	G	0.117954
872	0.944112	0.0157268	3.0737	4.96093	5	ATG12	0.492818	E	G	0.285767
873	-0.840618	0.0745292	-2.11878	2.68818	5	ATG13	0.686008	D	G	-0.0483071
874	-0.30519	0.617539	-0.545999	0.555087	5	ATG14	0.851	C	G	-0.367259
875	-0.834335	0.0789012	-2.08233	2.62148	5	ATG16L1	0.691415	X	G	-0.0980984
876	-0.409791	0.493233	-0.754066	0.778114	5	ATG2B	0.805779	A	G	-0.140726
877	0.560322	0.3259	1.09691	1.17172	5	ATG3	0.785715	G	G	0.512079
878	-0.708807	0.180161	-1.53249	1.74041	5	ATG4A	0.767629	B	G	-0.181374
879	-0.117011	0.851357	-0.203602	0.204072	5	ATG4B	0.947923	X	G	-0.0226738
880	-0.486039	0.406468	-0.919477	0.963277	5	ATG4C	0.805779	B	G	-0.248175
881	0.114633	0.854365	0.199427	0.199868	5	ATG4D	0.94886	D	G	-0.0918816
882	-0.134618	0.829118	-0.234589	0.235307	5	ATG5	0.938258	B	G	0.510243
883	-0.547059	0.339962	-1.06378	1.13193	5	ATG7	0.788594	B	G	-0.118327
884	0.811001	0.095788	1.95712	2.401	5	ATG9A	0.715779	F	G	-0.0529147
885	-0.150849	0.808664	-0.263287	0.264302	5	ATG9B	0.931481	X	G	-0.218633
886	-0.375611	0.533253	-0.684057	0.701979	5	ATIC	0.818573	X	G	-0.0467263
887	0.663558	0.222058	1.38416	1.53626	5	ATL1	0.767629	A	G	0.00593477
888	0.980835	0.00317577	4.01678	8.7192	5	ATL2	0.334657	A	G	-0.096529
889	-0.246807	0.688975	-0.436494	0.441129	5	ATM	0.882103	D	G	-0.0427831
890	-0.506251	0.384124	-0.965923	1.01677	5	ATMIN	0.805779	B	G	0.190622
891	0.401927	0.502384	0.737759	0.76027	5	ATN1	0.807936	B	G	0.0627781
892	NA	NA	NA	NA	5	ATOH1	NA	X	G	-0.0108399
893	-0.00390184	0.995032	-0.00675822	0.00675823	5	ATOH7	0.998446	X	G	0.121514
894	0.341362	0.57396	0.615975	0.629041	5	ATOH8	0.833414	X	G	0.212137
895	-0.361144	0.550378	-0.655062	0.670791	5	ATOX1	0.826574	H	G	-0.0553546
896	-0.640902	0.243923	-1.31584	1.44612	5	ATP10A	0.767629	C	G	-0.0789414
897	-0.728588	0.16265	-1.60338	1.84239	5	ATP10B	0.767629	X	G	-0.0944767
898	-0.48958	0.402531	-0.927527	0.972498	5	ATP10D	0.805779	A	G	-0.0328521
899	-0.771751	0.126325	-1.77474	2.102	5	ATP11A	0.745151	A	G	-0.0454216
900	0.552928	0.33372	1.07836	1.14938	5	ATP11B	0.787262	G	G	0.616121
901	0.753324	0.141502	1.69844	1.98403	5	ATP11C	0.756811	A	G	0.080786
902	-0.556336	0.33011	-1.08688	1.15963	5	ATP12A	0.787202	B	G	-0.150104
903	-0.713483	0.175975	-1.54887	1.76372	5	ATP13A1	0.767629	B	G	-0.0344149
904	0.288223	0.63817	0.513773	0.52134	5	ATP13A2	0.860149	X	G	-0.131821
905	-0.719591	0.170551	-1.57062	1.79489	5	ATP13A3	0.767629	D	G	-0.149599
906	-0.0740505	0.905802	-0.128494	0.128612	5	ATP13A4	0.9683	B	G	0.190124
907	-0.768346	0.129091	-1.76024	2.07928	5	ATP1A1	0.745582	B	G	0.172798
908	0.818444	0.0902933	1.99547	2.46714	5	ATP1B1	0.705603	B	G	-0.0574643
909	0.929771	0.0221047	2.86948	4.37446	5	ATP1B3	0.535255	A	G	0.381417
910	-0.95054	0.0131059	-3.18238	5.30062	5	ATP1B4	0.474897	X	G	-0.154203
911	-0.685734	0.201217	-1.45468	1.63182	5	ATP23	0.767629	X	G	-0.113275
912	0.484469	0.408215	0.915922	0.959211	5	ATP2A1	0.805779	C	G	0.115143
913	-0.834764	0.0786002	-2.08478	2.62592	5	ATP2A2	0.690566	A	G	-0.433411
914	0.713823	0.175672	1.55007	1.76543	5	ATP2A3	0.767629	B	G	0.712146
915	-0.40671	0.496814	-0.747663	0.771099	5	ATP2B1	0.806116	F	G	0.183769
916	-0.573394	0.312188	-1.13028	1.21222	5	ATP2B2	0.781883	A	G	-0.384785
917	0.0636775	0.918978	0.110442	0.110517	5	ATP2B4	0.973579	A	G	0.169185
918	-0.302352	0.620982	-0.540585	0.549404	5	ATP2C1	0.852214	A	G	-0.176455
919	-0.391248	0.514866	-0.71581	0.73636	5	ATP2C2	0.813356	X	G	0.0462172
920	0.930357	0.0218306	2.877	4.39492	5	ATP4A	0.533321	D	G	-0.0785747
921	-0.865802	0.0578113	-2.27949	2.99691	5	ATP4B	0.65057	E	G	0.0123699
922	0.994988	0.000425624	5.18451	17.2346	5	ATP5F1A	0.242284	E	G	0.151522
923	0.621195	0.263386	1.25911	1.37298	5	ATP5F1B	0.767629	D	G	-0.207079
924	-0.278713	0.649781	-0.495862	0.502664	5	ATP5F1C	0.865894	D	G	-0.229743
925	0.695613	0.192122	1.4874	1.67707	5	ATP5F1D	0.767629	D	G	-0.103633
926	0.677164	0.209203	1.42696	1.59395	5	ATP5F1E	0.767629	H	G	-0.0316251
927	0.725815	0.165074	1.59318	1.82754	5	ATP5IF1	0.767629	D	G	-0.00189352
928	0.750853	0.143576	1.68859	1.96908	5	ATP5MC1	0.758088	D	G	-0.227822
929	0.801462	0.102973	1.90991	2.32118	5	ATP5MC3	0.724404	B	G	-0.12253
930	-0.0884788	0.887492	-0.153652	0.153853	5	ATP5MD	0.96107	H	G	-0.112881
931	0.970812	0.00595972	3.64809	7.01088	5	ATP5ME	0.395052	E	G	0.014199
932	-0.779457	0.120132	-1.80823	2.15507	5	ATP5MF	0.741039	H	G	-0.386818
933	-0.277787	0.650914	-0.494123	0.500853	5	ATP5MG	0.866466	H	G	-0.146612
934	-0.149978	0.80976	-0.261745	0.262742	5	ATP5MPL	0.932113	H	G	-0.014344
935	0.80913	0.0971845	1.9477	2.38493	5	ATP5PB	0.716078	D	G	-0.204026
936	0.719752	0.170408	1.5712	1.79572	5	ATP5PD	0.767629	B	G	-0.312354
937	0.558086	0.328259	1.09128	1.16492	5	ATP5PF	0.786236	H	G	0.0130123
938	0.505565	0.384878	0.964325	1.01492	5	ATP5PO	0.805779	B	G	-0.249231
939	0.589529	0.295475	1.1725	1.26412	5	ATP6AP1	0.777903	X	G	0.385232
940	0.258233	0.6749	0.457632	0.462975	5	ATP6AP1L	0.876665	E	G	-0.0433633
941	-0.0561027	0.928605	-0.0972748	0.097326	5	ATP6AP2	0.977108	A	G	-0.0424125
942	-0.771245	0.126735	-1.77257	2.09859	5	ATP6V0A1	0.745544	B	G	0.0178475
943	-0.572609	0.313007	-1.12825	1.20975	5	ATP6V0A2	0.781883	B	G	0.00616317
944	-0.629275	0.255357	-1.28209	1.40242	5	ATP6V0A4	0.767629	X	G	-0.00588363
945	0.118621	0.849322	0.20643	0.206919	5	ATP6V0B	0.947247	A	G	-0.157657
946	0.875696	0.051617	2.3504	3.14116	5	ATP6V0C	0.639306	A	G	0.25848
947	0.0474289	0.939634	0.0822109	0.0822418	5	ATP6V0D1	0.981692	A	G	0.207735
948	-0.422958	0.477991	-0.781655	0.808459	5	ATP6V0D2	0.805779	X	G	-0.0350839
949	0.484225	0.408486	0.91537	0.95858	5	ATP6V0E1	0.805779	I	G	-0.0566395
950	-0.219671	0.722573	-0.386784	0.390007	5	ATP6V1A	0.893795	A	G	0.0920445
951	0.719797	0.170369	1.57136	1.79595	5	ATP6V1B1	0.767629	X	G	-0.0194654
952	0.722302	0.168159	1.58039	1.809	5	ATP6V1B2	0.767629	A	G	0.168904
953	-0.614674	0.269914	-1.24084	1.34974	5	ATP6V1C1	0.767629	A	G	-0.000374687
954	-0.75878	0.136956	-1.7205	2.01773	5	ATP6V1C2	0.752685	X	G	-0.215638
955	0.301945	0.621476	0.539808	0.548589	5	ATP6V1D	0.852214	A	G	0.343937
956	0.101291	0.871253	0.176046	0.176349	5	ATP6V1E1	0.95474	A	G	0.236407
957	0.738947	0.153689	1.64225	1.89962	5	ATP6V1F	0.76348	D	G	0.0200893
958	-0.674232	0.211955	-1.41762	1.58128	5	ATP6V1G1	0.767629	A	G	-0.000183916
959	0.83777	0.0765015	2.1021	2.65751	5	ATP6V1G3	0.687465	X	G	0.0235367
960	-0.692977	0.194536	-1.47858	1.66483	5	ATP6V1H	0.767629	B	G	0.0464613
961	-0.596479	0.28835	-1.19107	1.28718	5	ATP7A	0.776365	A	G	-0.135703
962	0.8109	0.0958629	1.95662	2.40013	5	ATP7B	0.715779	A	G	-0.184392
963	-0.342818	0.572218	-0.61883	0.63208	5	ATP8A1	0.83251	B	G	0.444658
964	0.663964	0.221671	1.38542	1.53794	5	ATP8A2	0.767629	F	G	0.271872
965	0.550483	0.336317	1.07227	1.14208	5	ATP8B2	0.788152	D	G	-0.0328009
966	0.526868	0.361648	1.01463	1.07367	5	ATP8B3	0.797688	X	G	0.0100805
967	0.745399	0.148183	1.66714	1.93674	5	ATP9A	0.7596	X	G	0.20117
968	-0.794574	0.108258	-1.87705	2.26666	5	ATP9B	0.729573	D	G	-0.0464985
969	-0.359822	0.551948	-0.652431	0.66797	5	ATPAF1	0.826785	X	G	-0.223403
970	0.708553	0.18039	1.5316	1.73916	5	ATPAF2	0.767629	A	G	0.195234
971	0.940628	0.0172108	3.01978	4.79972	5	ATPSCKMT	0.502956	A	G	0.641517
972	-0.479607	0.413639	-0.904951	0.946688	5	ATR	0.805779	A	G	0.0153211
973	-0.131573	0.832961	-0.22922	0.22989	5	ATRAID	0.939611	D	G	-0.0656958
974	-0.100621	0.872102	-0.174873	0.17517	5	ATRIP	0.955177	A	G	0.0873102
975	-0.626359	0.258248	-1.27375	1.39171	5	ATRN	0.767629	X	G	-0.0833385
976	-0.850312	0.0679384	-2.17767	2.79848	5	ATRNL1	0.674097	B	G	0.406656
977	-0.708972	0.180013	-1.53306	1.74123	5	ATRX	0.767629	A	G	-0.0896493
978	-0.475783	0.417916	-0.89637	0.936922	5	ATXN1	0.805779	A	G	-0.40733
979	-0.588606	0.296425	-1.17005	1.2611	5	ATXN10	0.777903	X	G	0.150306
980	-0.604869	0.279809	-1.2138	1.31562	5	ATXN1L	0.770887	B	G	-0.131659
981	0.692954	0.194558	1.47851	1.66472	5	ATXN2	0.767629	B	G	0.0316072
982	-0.429447	0.470517	-0.795389	0.823641	5	ATXN3	0.805779	D	G	0.202283
983	-0.630283	0.25436	-1.28498	1.40615	5	ATXN7	0.767629	A	G	0.0172257
984	-0.541394	0.346012	-1.04984	1.11531	5	ATXN7L1	0.791194	A	G	-0.0861345
985	-0.269692	0.660826	-0.478967	0.485095	5	ATXN7L2	0.870668	X	G	-0.0777636
986	0.670882	0.215112	1.40702	1.56696	5	ATXN7L3	0.767629	A	G	-0.0232692
987	0.803307	0.101571	1.91888	2.33621	5	AUH	0.724135	B	G	-0.126476
988	0.135688	0.827768	0.236477	0.237213	5	AUP1	0.937631	D	G	-0.00688466
989	0.131159	0.833483	0.22849	0.229153	5	AURKA	0.939879	X	G	0.238585
990	-0.69496	0.192719	-1.48521	1.67403	5	AURKAIP1	0.767629	X	G	0.13552
991	-0.955267	0.0112807	-3.27148	5.59461	5	AUTS2	0.469267	A	G	-0.169682
992	0.607189	0.277459	1.22016	1.32361	5	AVEN	0.77006	A	G	0.689649
993	0.143547	0.81786	0.250359	0.251232	5	AVL9	0.933008	B	G	0.294852
994	0.424168	0.476595	0.78421	0.811279	5	AVPI1	0.805779	A	G	0.297931
995	-0.598147	0.286647	-1.19556	1.29278	5	AVPR1A	0.775036	X	G	-0.10469
996	NA	NA	NA	NA	5	AVPR1B	NA	X	G	-0.0557091
997	-0.220277	0.72182	-0.387888	0.391138	5	AXIN1	0.893668	C	G	-0.141229
998	0.122558	0.844346	0.213349	0.213889	5	AXIN2	0.945265	X	G	0.165255
999	-0.831412	0.0809606	-2.06581	2.59162	5	AZI2	0.695346	B	G	-0.010789
1000	0.0757116	0.903693	0.131388	0.131514	5	AZIN1	0.968032	G	G	0.554197
1001	-0.614457	0.270133	-1.24024	1.34897	5	AZIN2	0.767629	B	G	-0.245664
1002	-0.559361	0.326913	-1.09449	1.16879	5	B2M	0.785887	C	G	0.0514909
1003	-0.490033	0.402029	-0.928558	0.973681	5	B3GALNT1	0.805779	B	G	-0.136994
1004	-0.787906	0.113449	-1.84617	2.21615	5	B3GALNT2	0.733019	A	G	0.205912
1005	-0.709039	0.179953	-1.5333	1.74156	5	B3GALT1	0.767629	C	G	-0.0687078
1006	-0.67088	0.215114	-1.40702	1.56695	5	B3GALT2	0.767629	B	G	0.313697
1007	0.480597	0.412533	0.90718	0.949229	5	B3GALT5	0.805779	A	G	-0.163222
1008	0.365875	0.544766	0.664506	0.680927	5	B3GALT6	0.823834	X	G	0.353825
1009	0.531064	0.357114	1.02473	1.08556	5	B3GAT1	0.795977	X	G	-0.151064
1010	-0.389449	0.516975	-0.712133	0.732367	5	B3GAT2	0.813502	X	G	-0.0902157
1011	-0.0426189	0.945752	-0.0738628	0.0738851	5	B3GLCT	0.984028	A	G	0.219766
1012	-0.644256	0.24065	-1.32574	1.45904	5	B3GNT2	0.767629	B	G	-0.277199
1013	0.32256	0.596541	0.579374	0.590239	5	B3GNT4	0.84425	X	G	0.0507351
1014	0.717625	0.172292	1.56357	1.78476	5	B3GNT5	0.767629	A	G	0.0865192
1015	-0.846906	0.0702327	-2.15659	2.75863	5	B3GNT7	0.681775	C	G	-0.217372
1016	-0.753025	0.141753	-1.69725	1.98221	5	B3GNT9	0.756811	C	G	-0.119235
1017	0.0886119	0.887324	0.153884	0.154086	5	B3GNTL1	0.961023	A	G	-0.0688434
1018	-0.789723	0.112027	-1.8545	2.2297	5	B4GALNT3	0.7328	A	G	-0.279764
1019	0.266048	0.665297	0.472167	0.478037	5	B4GALNT4	0.872335	D	G	-0.0349579
1020	0.565921	0.320008	1.11111	1.18891	5	B4GALT1	0.78326	C	G	0.176552
1021	-0.168913	0.78596	-0.295397	0.296831	5	B4GALT2	0.923009	D	G	0.0255199
1022	0.4163	0.485686	0.767658	0.793038	5	B4GALT3	0.805779	D	G	-0.00261965
1023	-0.416839	0.485062	-0.768788	0.794281	5	B4GALT4	0.805779	A	G	-0.346104
1024	0.882991	0.0471943	2.40614	3.25824	5	B4GALT5	0.627891	C	G	0.234254
1025	0.661653	0.223875	1.37828	1.52841	5	B4GALT6	0.767629	A	G	-0.246346
1026	0.348465	0.56547	0.62994	0.643919	5	B4GALT7	0.831191	A	G	-0.000942491
1027	0.183724	0.767399	0.321873	0.323729	5	B4GAT1	0.915122	D	G	-0.0022047
1028	0.19256	0.756349	0.33774	0.339885	5	B9D1	0.90933	X	G	0.0785375
1029	-0.585428	0.2997	-1.16165	1.25072	5	BAALC	0.779073	B	G	-0.0268383
1030	0.520379	0.368687	0.999149	1.05549	5	BABAM1	0.80198	D	G	0.19277
1031	-0.00022385	0.999715	-0.00038772	0.00038772	5	BABAM2	0.999868	B	G	0.408297
1032	0.632919	0.251759	1.29258	1.41594	5	BACE1	0.767629	D	G	0.268591
1033	0.397877	0.507111	0.729407	0.751159	5	BACE2	0.810088	B	G	0.345993
1034	-0.318202	0.601797	-0.570963	0.58136	5	BACH1	0.845199	A	G	-0.258958
1035	-0.908142	0.0329558	-2.62721	3.75708	5	BACH2	0.568206	C	G	0.218378
1036	-0.71129	0.177935	-1.54116	1.75273	5	BAG1	0.767629	X	G	0.217468
1037	0.330718	0.586724	0.595192	0.606975	5	BAG2	0.839599	C	G	0.20349
1038	-0.440415	0.457942	-0.818818	0.84966	5	BAG3	0.805779	C	G	-0.148498
1039	-0.63069	0.253958	-1.28615	1.40765	5	BAG4	0.767629	B	G	-0.12404
1040	0.909789	0.0320816	2.64363	3.79646	5	BAG5	0.563255	F	G	0.432715
1041	0.503524	0.387121	0.959583	1.00943	5	BAHCC1	0.805779	B	G	-0.0275116
1042	0.22704	0.713427	0.400219	0.40379	5	BAHD1	0.890955	C	G	0.0580436
1043	-0.647157	0.23783	-1.33436	1.47032	5	BAIAP2	0.767629	B	G	-0.135738
1044	0.586682	0.298407	1.16496	1.2548	5	BAIAP2L1	0.778133	X	G	-0.135908
1045	-0.162087	0.794532	-0.28324	0.284505	5	BAIAP2L2	0.927296	X	G	-0.0334975
1046	0.474299	0.419579	0.893049	0.933147	5	BAK1	0.805779	X	G	0.00506356
1047	-0.438223	0.460448	-0.814116	0.844425	5	BAMBI	0.805779	A	G	-0.0165114
1048	0.0711969	0.909426	0.123526	0.12363	5	BANK1	0.969719	B	G	0.492345
1049	-0.377916	0.530535	-0.688709	0.707001	5	BANP	0.816862	X	G	-0.131714
1050	-0.717296	0.172583	-1.5624	1.78308	5	BAP1	0.767629	B	G	-0.11428
1051	-0.331297	0.586028	-0.596319	0.608169	5	BARD1	0.839364	B	G	0.428571
1052	0.477131	0.416407	0.89939	0.940356	5	BARHL1	0.805779	X	G	-0.0023912
1053	-0.0629869	0.919856	-0.109241	0.109314	5	BARHL2	0.973801	X	G	-0.00738466
1054	0.944272	0.0156596	3.07626	4.96869	5	BARX1	0.492818	G	G	0.805189
1055	0.48509	0.407523	0.917328	0.960818	5	BARX2	0.805779	B	G	0.401989
1056	-0.49836	0.392811	-0.947643	0.995634	5	BASP1	0.805779	F	G	0.0770028
1057	0.422644	0.478352	0.780994	0.80773	5	BATF	0.805779	A	G	-0.00814347
1058	-0.427585	0.472658	-0.79144	0.81927	5	BATF3	0.805779	C	G	0.107401
1059	-0.998965	3.99553e-05	-6.55247	38.0428	5	BAZ1A	0.156928	A	G	-0.310353
1060	-0.487015	0.405382	-0.921692	0.965812	5	BAZ1B	0.805779	A	G	-0.108713
1061	0.651269	0.233848	1.34667	1.48651	5	BAZ2A	0.767629	B	G	-0.115997
1062	-0.671375	0.214647	-1.40858	1.56905	5	BAZ2B	0.767629	A	G	-0.0801203
1063	-0.587643	0.297416	-1.1675	1.25794	5	BBIP1	0.777942	A	G	-0.0298457
1064	-0.230596	0.709019	-0.406718	0.410466	5	BBOX1	0.889286	X	G	-0.0415754
1065	-0.438448	0.460192	-0.814596	0.84496	5	BBS10	0.805779	A	G	-0.258165
1066	-0.940778	0.0171461	-3.02204	4.80638	5	BBS12	0.502956	E	G	-0.0238683
1067	0.0360435	0.954118	0.0624563	0.0624698	5	BBS2	0.98677	A	G	-0.183826
1068	-0.765649	0.131294	-1.7489	2.0616	5	BBS4	0.747509	B	G	0.185825
1069	-0.0685082	0.912841	-0.118846	0.118939	5	BBS5	0.97087	G	G	0.561525
1070	-0.559781	0.32647	-1.09555	1.17007	5	BBS7	0.785728	A	G	-0.161442
1071	0.383929	0.523456	0.700892	0.720178	5	BBS9	0.81455	A	G	0.272644
1072	-0.88514	0.0459153	-2.42318	3.29471	5	BBX	0.619933	B	G	-0.478346
1073	0.877132	0.0507367	2.36112	3.16343	5	BCAN	0.638382	X	G	-0.153876
1074	0.746036	0.147643	1.66962	1.94047	5	BCAP29	0.758523	G	G	0.796346
1075	0.146129	0.814607	0.254929	0.25585	5	BCAR1	0.93258	H	G	-0.204166
1076	0.0125072	0.984076	0.0216643	0.0216648	5	BCAR3	0.994872	X	G	0.258001
1077	-0.468854	0.425692	-0.880922	0.919395	5	BCAS1	0.805779	I	G	-0.209616
1078	0.685995	0.200976	1.45553	1.633	5	BCAS2	0.767629	X	G	0.335657
1079	0.0442538	0.943673	0.0767	0.0767251	5	BCAS3	0.983305	B	G	0.175164
1080	-0.53695	0.350778	-1.03899	1.10243	5	BCAT1	0.793231	C	G	0.198415
1081	-0.000112119	0.999857	-0.000194196	0.000194196	5	BCCIP	0.999908	A	G	-0.0642385
1082	0.901734	0.0364279	2.56589	3.61295	5	BCDIN3D	0.582483	D	G	0.17138
1083	-0.583267	0.301933	-1.15597	1.24372	5	BCHE	0.779604	A	G	-0.381961
1084	-0.475573	0.418151	-0.895899	0.936386	5	BCKDHB	0.805779	X	G	-0.0183863
1085	0.53896	0.34862	1.04389	1.10824	5	BCKDK	0.791981	X	G	-0.00807263
1086	-0.621466	0.263116	-1.25988	1.37395	5	BCL10	0.767629	B	G	0.0714061
1087	-0.868401	0.0561629	-2.29763	3.03333	5	BCL11A	0.647988	A	G	-0.270478
1088	0.406773	0.496741	0.747792	0.771241	5	BCL11B	0.806096	A	G	-0.207411
1089	-0.838078	0.0762871	-2.10389	2.66079	5	BCL2	0.687465	A	G	-0.380935
1090	-0.562116	0.324009	-1.10145	1.1772	5	BCL2A1	0.784476	C	G	0.0526091
1091	0.812224	0.0948784	1.96333	2.41163	5	BCL2L1	0.71489	D	G	0.124998
1092	0.0899204	0.885664	0.156169	0.15638	5	BCL2L10	0.960633	B	G	0.44818
1093	-0.252067	0.682491	-0.446208	0.45116	5	BCL2L11	0.879608	A	G	0.146833
1094	-0.205483	0.740224	-0.361047	0.363667	5	BCL2L13	0.901769	X	G	-0.187009
1095	0.199396	0.747814	0.350053	0.352441	5	BCL2L14	0.905182	X	G	0.070545
1096	0.134924	0.828732	0.23513	0.235853	5	BCL6	0.938258	X	G	0.108909
1097	-0.821662	0.0879484	-2.01249	2.49688	5	BCL7A	0.702866	D	G	0.094414
1098	0.238792	0.698875	0.421742	0.425922	5	BCL7B	0.885034	D	G	-0.181277
1099	-0.261048	0.671438	-0.46286	0.468389	5	BCL9	0.875281	C	G	0.366687
1100	0.689614	0.19763	1.46743	1.64939	5	BCL9L	0.767629	X	G	0.328936
1101	-0.514874	0.374684	-0.986125	1.04027	5	BCLAF1	0.804369	A	G	0.121238
1102	-0.414073	0.488265	-0.762997	0.787915	5	BCLAF3	0.805779	A	G	0.300405
1103	-0.467178	0.427578	-0.877205	0.915189	5	BCO1	0.805779	C	G	0.0691873
1104	-0.456624	0.439496	-0.853967	0.888988	5	BCO2	0.805779	X	G	-0.149534
1105	-0.0725427	0.907717	-0.125869	0.12598	5	BCOR	0.969106	X	G	-0.0810065
1106	0.429956	0.469932	0.79647	0.824838	5	BCORL1	0.805779	D	G	0.155984
1107	-0.783362	0.117029	-1.82561	2.18291	5	BCR	0.736609	A	G	-0.289971
1108	-0.588326	0.296712	-1.16931	1.26018	5	BDH1	0.777932	B	G	-0.274717
1109	0.211265	0.733024	0.371516	0.374372	5	BDH2	0.897731	X	G	0.297076
1110	-0.266005	0.66535	-0.472086	0.477953	5	BDKRB1	0.872335	A	G	-0.0344358
1111	-0.408248	0.495025	-0.750857	0.774597	5	BDKRB2	0.805779	X	G	-0.0891366
1112	0.041321	0.947403	0.0716108	0.0716312	5	BDNF	0.984137	B	G	0.156386
1113	0.952957	0.0121614	3.22685	5.44555	5	BDP1	0.470121	E	G	0.132001
1114	0.0125921	0.983968	0.0218113	0.0218119	5	BEAN1	0.994872	A	G	-0.228595
1115	-0.225595	0.715219	-0.39758	0.401081	5	BECN1	0.89159	A	G	-0.0607406
1116	0.436867	0.462002	0.811209	0.841193	5	BEGAIN	0.805779	A	G	-0.0249661
1117	-0.749961	0.144327	-1.68505	1.96373	5	BEND2	0.758163	A	G	-0.0721152
1118	-0.614778	0.26981	-1.24113	1.3501	5	BEND3	0.767629	A	G	-0.106989
1119	-0.145801	0.81502	-0.254348	0.255263	5	BEND4	0.93258	C	G	-0.190885
1120	-0.936649	0.0189579	-2.96183	4.63166	5	BEND5	0.513511	X	G	-0.123465
1121	0.196131	0.751889	0.344168	0.346437	5	BEND6	0.906998	B	G	-0.323078
1122	-0.846027	0.0708281	-2.15122	2.74855	5	BEND7	0.683835	B	G	-0.315899
1123	-0.525816	0.362787	-1.01211	1.07071	5	BEST3	0.798305	B	G	-0.128982
1124	-0.520132	0.368955	-0.998563	1.05481	5	BET1	0.80198	X	G	-0.0248405
1125	-0.198209	0.749294	-0.347914	0.350258	5	BET1L	0.90624	D	G	0.0523959
1126	-0.278462	0.650088	-0.49539	0.502172	5	BFAR	0.865991	A	G	-0.302807
1127	0.780979	0.11892	1.81497	2.16584	5	BFSP1	0.739455	A	G	0.072393
1128	-0.350341	0.563233	-0.633641	0.647869	5	BFSP2	0.829887	X	G	-0.117834
1129	0.698431	0.189549	1.49689	1.69031	5	BGLAP	0.767629	X	G	0.0564953
1130	0.506567	0.383777	0.96666	1.01763	5	BHLHA15	0.805779	G	G	0.355145
1131	NA	NA	NA	NA	5	BHLHA9	NA	X	G	0.045493
1132	-0.494957	0.396572	-0.939818	0.986619	5	BHLHE22	0.805779	B	G	-0.00305736
1133	-0.194883	0.753447	-0.341921	0.344146	5	BHLHE23	0.907846	A	G	0.136414
1134	-0.200513	0.746421	-0.352068	0.354498	5	BHLHE40	0.90494	A	G	0.149063
1135	0.338059	0.577915	0.609507	0.622165	5	BHLHE41	0.835906	A	G	0.386219
1136	-0.301437	0.622093	-0.53884	0.547574	5	BICC1	0.852505	X	G	-0.047577
1137	0.802567	0.102133	1.91527	2.33016	5	BICD1	0.724335	A	G	0.536756
1138	-0.0398637	0.949257	-0.0690826	0.0691009	5	BICD2	0.985067	A	G	-0.200218
1139	-0.810892	0.0958693	-1.95657	2.40006	5	BICDL1	0.715779	X	G	-0.127689
1140	-0.622598	0.261987	-1.26308	1.37804	5	BICRAL	0.767629	A	G	-0.0268322
1141	-0.581837	0.303412	-1.15222	1.23911	5	BID	0.779796	A	G	0.0702948
1142	0.233346	0.705613	0.411753	0.415642	5	BIN1	0.88835	A	G	0.0529902
1143	0.452491	0.444184	0.844943	0.878857	5	BIN2	0.805779	C	G	0.122884
1144	-0.228876	0.711151	-0.403573	0.407234	5	BIN3	0.890298	B	G	-0.0864734
1145	-0.199749	0.747373	-0.350691	0.353092	5	BIRC2	0.905182	B	G	-0.169064
1146	0.38819	0.518451	0.709565	0.729579	5	BIRC5	0.814247	X	G	0.526488
1147	-0.6253	0.259299	-1.27074	1.38784	5	BIRC6	0.767629	A	G	-0.0136583
1148	0.0988136	0.874392	0.171711	0.171992	5	BIRC7	0.955779	F	G	0.258036
1149	-0.760625	0.135428	-1.72806	2.02936	5	BIVM	0.750945	X	G	0.173833
1150	-0.0342141	0.956446	-0.0592838	0.0592953	5	BLCAP	0.987239	D	G	-0.102969
1151	0.559067	0.327224	1.09375	1.1679	5	BLK	0.786042	F	G	-0.0794349
1152	-0.449716	0.447337	-0.83891	0.872096	5	BLM	0.805779	A	G	-0.165404
1153	0.77857	0.12084	1.80433	2.14884	5	BLMH	0.741039	A	G	0.229237
1154	-0.808058	0.0979881	-1.94233	2.37581	5	BLNK	0.718145	X	G	-0.026881
1155	-0.421561	0.479603	-0.778711	0.805211	5	BLOC1S2	0.805779	B	G	0.210162
1156	0.251823	0.682791	0.445758	0.450695	5	BLOC1S3	0.879608	X	G	-0.0392926
1157	-0.313418	0.607577	-0.561759	0.571659	5	BLOC1S4	0.847359	B	G	0.110467
1158	-0.310328	0.611315	-0.55583	0.565419	5	BLOC1S5	0.84925	B	G	-0.00617638
1159	-0.621752	0.262831	-1.26068	1.37498	5	BLOC1S6	0.767629	B	G	0.11899
1160	-0.387487	0.519277	-0.708131	0.728024	5	BLVRA	0.81455	X	G	-0.202008
1161	-0.480296	0.412869	-0.906503	0.948457	5	BLZF1	0.805779	B	G	0.446378
1162	0.738294	0.15425	1.63977	1.89593	5	BMERB1	0.76348	A	G	0.183055
1163	-0.706736	0.182024	-1.5253	1.73024	5	BMF	0.767629	X	G	0.0518598
1164	-0.819311	0.0896591	-2.00003	2.47509	5	BMI1	0.70554	A	G	-0.100925
1165	-0.170879	0.783494	-0.298903	0.300389	5	BMP1	0.922321	X	G	-0.163818
1166	0.612372	0.272228	1.23445	1.34164	5	BMP10	0.767629	X	G	0.253762
1167	0.408227	0.49505	0.750813	0.774548	5	BMP15	0.805779	B	G	0.251569
1168	0.822868	0.0870743	2.01894	2.50821	5	BMP2	0.700811	G	G	0.886469
1169	-0.86052	0.0612067	-2.2436	2.92583	5	BMP2K	0.658739	X	G	-0.24182
1170	-0.414206	0.488111	-0.763275	0.788221	5	BMP3	0.805779	X	G	0.0691518
1171	-0.637631	0.247125	-1.30626	1.43366	5	BMP4	0.767629	X	G	-0.201057
1172	0.815553	0.0924154	1.98041	2.44103	5	BMP5	0.706884	X	G	0.0787956
1173	-0.67088	0.215114	-1.40702	1.56695	5	BMP6	0.767629	X	G	-0.0635424
1174	-0.424968	0.475673	-0.7859	0.813146	5	BMP7	0.805779	X	G	-0.0788339
1175	-0.364779	0.546066	-0.662314	0.678573	5	BMPER	0.824415	I	G	-0.188656
1176	0.0818478	0.895905	0.142082	0.142242	5	BMPR1A	0.96427	B	G	0.504309
1177	0.709138	0.179864	1.53364	1.74205	5	BMPR1B	0.767629	X	G	-0.0317713
1178	-0.701986	0.186317	-1.50897	1.70723	5	BMPR2	0.767629	C	G	-0.160394
1179	0.232418	0.706763	0.410053	0.413894	5	BMS1	0.8886	X	G	-0.0429661
1180	0.0741565	0.905668	0.128679	0.128797	5	BMT2	0.9683	A	G	0.283544
1181	-0.758283	0.137368	-1.71848	2.01462	5	BNC1	0.753178	X	G	-0.00202956
1182	0.874468	0.0523737	2.34132	3.1224	5	BNC2	0.643223	X	G	0.0352394
1183	-0.692162	0.195285	-1.47587	1.66106	5	BNIP1	0.767629	A	G	-0.0615559
1184	-0.308817	0.613144	-0.552935	0.562375	5	BNIP2	0.849981	X	G	-0.137534
1185	-0.132916	0.831266	-0.231587	0.232277	5	BNIP3	0.938508	X	G	-0.44591
1186	-0.20732	0.737935	-0.364371	0.367065	5	BNIP3L	0.90022	B	G	0.321676
1187	0.599424	0.285344	1.19901	1.29709	5	BOC	0.774822	A	G	0.273517
1188	0.492373	0.399434	0.9339	0.979814	5	BOD1	0.805779	A	G	-0.0683018
1189	-0.425013	0.475621	-0.785995	0.813251	5	BOD1L1	0.805779	A	G	-0.0985422
1190	-0.779745	0.119902	-1.80951	2.1571	5	BOK	0.740982	B	G	0.12462
1191	-0.227239	0.713181	-0.400581	0.404162	5	BOLA1	0.890761	E	G	-0.130235
1192	0.171471	0.782751	0.29996	0.301462	5	BOLA3	0.922128	X	G	-0.176253
1193	0.397306	0.507777	0.728234	0.749879	5	BOLL	0.810249	X	G	-0.133818
1194	0.482088	0.410869	0.910541	0.953065	5	BOP1	0.805779	D	G	0.0538223
1195	-0.161975	0.794672	-0.283043	0.284304	5	BORA	0.927296	A	G	-0.0900715
1196	-0.140534	0.821658	-0.245033	0.245851	5	BORCS5	0.934773	B	G	0.428842
1197	0.421576	0.479585	0.778743	0.805247	5	BORCS6	0.805779	B	G	0.0182907
1198	-0.109147	0.861306	-0.189804	0.190184	5	BORCS7	0.950737	X	G	0.176635
1199	0.4929	0.39885	0.935106	0.981199	5	BORCS8	0.805779	B	G	-0.186544
1200	-0.799195	0.104703	-1.89899	2.30296	5	BPGM	0.725791	B	G	-0.100438
1201	0.42237	0.478669	0.780416	0.807092	5	BPHL	0.805779	X	G	-0.0228571
1202	-0.26862	0.662141	-0.476966	0.483017	5	BPIFB2	0.871374	X	G	0.0158249
1203	0.278656	0.649851	0.495754	0.502551	5	BPIFC	0.86591	X	G	0.196735
1204	0.213746	0.729937	0.376016	0.378976	5	BPNT1	0.896636	A	G	-0.0606373
1205	-0.0520298	0.933784	-0.0901997	0.0902404	5	BPNT2	0.979523	A	G	-0.233656
1206	-0.488355	0.403892	-0.924737	0.9693	5	BPTF	0.805779	A	G	-0.0992578
1207	-0.512586	0.377183	-0.98074	1.03399	5	BRAF	0.804372	A	G	-0.226374
1208	0.276021	0.653074	0.490811	0.497406	5	BRAP	0.867556	D	G	0.163157
1209	-0.408555	0.494668	-0.751495	0.775296	5	BRAT1	0.805779	A	G	-0.182105
1210	-0.174488	0.778967	-0.305347	0.306931	5	BRCA1	0.920529	G	G	0.447336
1211	-0.585921	0.299191	-1.16295	1.25233	5	BRCA2	0.779073	A	G	-0.0434666
1212	-0.0176549	0.977522	-0.0305824	0.030584	5	BRCC3	0.994328	X	G	0.268492
1213	-0.698931	0.189093	-1.49858	1.69268	5	BRD1	0.767629	A	G	0.115047
1214	-0.817708	0.090832	-1.99162	2.46044	5	BRD3	0.706159	A	G	0.0833
1215	-0.352973	0.560095	-0.638843	0.653426	5	BRD3OS	0.82907	B	G	0.12231
1216	-0.804437	0.100715	-1.92441	2.34551	5	BRD7	0.722634	A	G	-0.102431
1217	-0.437328	0.461474	-0.812196	0.84229	5	BRD8	0.805779	D	G	-0.11094
1218	-0.608987	0.275642	-1.2251	1.32983	5	BRD9	0.768627	A	G	-0.0968793
1219	-0.68977	0.197487	-1.46794	1.6501	5	BRDT	0.767629	F	G	-0.0375599
1220	0.172183	0.781858	0.30123	0.302751	5	BRF1	0.921809	X	G	0.172246
1221	-0.295162	0.629718	-0.52691	0.535075	5	BRF2	0.855156	X	G	-0.0911563
1222	0.662465	0.2231	1.38078	1.53175	5	BRI3	0.767629	D	G	0.309853
1223	0.15739	0.800435	0.274892	0.276048	5	BRI3BP	0.929394	X	G	0.332871
1224	-0.295724	0.629035	-0.527976	0.536191	5	BRICD5	0.854919	X	G	-0.0884987
1225	0.937461	0.0185973	2.97336	4.66466	5	BRINP1	0.511312	C	G	-0.0757859
1226	-0.890929	0.0425268	-2.47062	3.3979	5	BRINP2	0.603808	A	G	-0.209208
1227	-0.610998	0.273613	-1.23064	1.33683	5	BRIP1	0.767629	A	G	0.0671658
1228	0.865551	0.057971	2.27776	2.99345	5	BRIX1	0.65057	E	G	0.144663
1229	0.663285	0.222318	1.38331	1.53513	5	BRK1	0.767629	X	G	-0.0560613
1230	0.170136	0.784425	0.297579	0.299045	5	BRMS1L	0.922814	B	G	0.0332427
1231	-0.0705077	0.910301	-0.122326	0.122428	5	BROX	0.97002	B	G	0.602752
1232	0.759298	0.136526	1.72262	2.02099	5	BRPF1	0.751728	D	G	-0.0466624
1233	-0.382101	0.525606	-0.697182	0.716161	5	BRPF3	0.815951	B	G	0.0794398
1234	0.398082	0.506871	0.729829	0.751619	5	BRS3	0.810088	B	G	0.564749
1235	-0.775618	0.123206	-1.79142	2.12833	5	BRSK2	0.741763	D	G	-0.242323
1236	-0.319258	0.600523	-0.572999	0.583508	5	BRWD1	0.844805	C	G	-0.110961
1237	-0.176024	0.777042	-0.308091	0.309719	5	BRWD3	0.919163	X	G	-0.0263706
1238	0.70894	0.180042	1.53295	1.74107	5	BSCL2	0.767629	B	G	0.088029
1239	0.30778	0.6144	0.55095	0.560288	5	BSDC1	0.850203	B	G	0.0223016
1240	-0.666325	0.219426	-1.39275	1.54777	5	BSG	0.767629	D	G	-0.145789
1241	0.656499	0.22881	1.36249	1.50742	5	BSN	0.767629	D	G	0.258827
1242	-0.289776	0.636276	-0.516708	0.524407	5	BSND	0.859041	X	G	-0.0892705
1243	0.12912	0.836058	0.224897	0.22553	5	BSPRY	0.940996	X	G	0.527217
1244	-0.252045	0.682517	-0.446169	0.451119	5	BST1	0.879608	A	G	-0.118359
1245	0.267148	0.663947	0.474219	0.480166	5	BSX	0.872335	X	G	0.0110774
1246	-0.380422	0.527583	-0.693777	0.712479	5	BTAF1	0.816347	A	G	-0.160684
1247	-0.685378	0.201547	-1.45351	1.63023	5	BTBD1	0.767629	B	G	0.00967413
1248	-0.22158	0.720202	-0.39026	0.393571	5	BTBD10	0.893618	A	G	-0.15278
1249	-0.906145	0.0340258	-2.60768	3.71067	5	BTBD11	0.571389	F	G	-0.10237
1250	0.509955	0.380062	0.974571	1.02682	5	BTBD17	0.804794	A	G	-0.238618
1251	0.903566	0.0354237	2.58303	3.65277	5	BTBD18	0.576893	F	G	0.145037
1252	-0.0435699	0.944543	-0.0755131	0.075537	5	BTBD19	0.983558	C	G	0.236301
1253	0.478523	0.414851	0.902513	0.943912	5	BTBD2	0.805779	D	G	-0.0135561
1254	-0.869877	0.0552332	-2.30809	3.05447	5	BTBD3	0.647988	B	G	0.418509
1255	0.805665	0.099788	1.93046	2.3557	5	BTBD6	0.721206	A	G	-0.0144406
1256	-0.668309	0.217545	-1.39894	1.55608	5	BTBD7	0.767629	A	G	-0.0535919
1257	-0.488059	0.404221	-0.924064	0.968529	5	BTBD8	0.805779	F	G	0.103658
1258	-0.86794	0.0564539	-2.29439	3.0268	5	BTBD9	0.647988	A	G	-0.208648
1259	-0.505212	0.385265	-0.963505	1.01397	5	BTC	0.805779	F	G	-0.0240324
1260	0.391429	0.514654	0.71618	0.736763	5	BTD	0.813356	C	G	-0.11115
1261	0.974991	0.00472973	3.78375	7.59858	5	BTF3	0.38502	E	G	0.190368
1262	-0.576165	0.309301	-1.13744	1.22098	5	BTF3L4	0.781693	B	G	0.0222805
1263	-0.822273	0.0875054	-2.01575	2.50261	5	BTG1	0.701705	A	G	-0.211815
1264	0.458078	0.437851	0.85715	0.892567	5	BTG4	0.805779	C	G	-0.112758
1265	0.818518	0.0902386	1.99586	2.46782	5	BTK	0.70554	E	G	0.217576
1266	-0.699648	0.18844	-1.50102	1.69608	5	BTRC	0.767629	A	G	-0.129097
1267	-0.323295	0.595655	-0.580796	0.591741	5	BUB1	0.843936	X	G	0.128367
1268	-0.720777	0.169503	-1.57488	1.80104	5	BUB1B	0.767629	A	G	-0.172557
1269	-0.421439	0.479743	-0.778455	0.804928	5	BUB3	0.805779	B	G	0.193637
1270	0.136499	0.826746	0.237907	0.238656	5	BUD13	0.937423	A	G	-0.188846
1271	-0.0890179	0.886809	-0.154593	0.154798	5	BUD23	0.96098	D	G	-0.0316852
1272	-0.714559	0.175016	-1.55268	1.76915	5	BUD31	0.767629	H	G	-0.127891
1273	0.790469	0.111446	1.85794	2.23531	5	BVES	0.7328	A	G	-0.14327
1274	0.906842	0.0336514	2.61445	3.72669	5	BYSL	0.570792	D	G	0.159644
1275	-0.66354	0.222075	-1.3841	1.53619	5	BZW1	0.767629	B	G	0.0334464
1276	-0.800643	0.103597	-1.90595	2.31457	5	BZW2	0.724404	A	G	-0.171175
1277	-0.265648	0.665788	-0.471422	0.477264	5	C10H15orf40	0.872335	A	G	0.0366831
1278	-0.286393	0.640401	-0.510319	0.517734	5	C10H15orf48	0.86102	A	G	0.0585811
1279	-0.977028	0.00416503	-3.85822	7.94083	5	C10H15orf61	0.361915	A	G	-0.313439
1280	-0.588255	0.296785	-1.16912	1.25995	5	C11H16orf70	0.777932	B	G	0.0187639
1281	-0.769653	0.128027	-1.76579	2.08795	5	C11H16orf87	0.745582	B	G	0.1426
1282	-0.430614	0.469175	-0.79787	0.826389	5	C12H3orf14	0.805779	B	G	0.123719
1283	-0.221562	0.720223	-0.390229	0.393538	5	C12H3orf18	0.893618	A	G	-0.184768
1284	-0.544916	0.342247	-1.05849	1.12562	5	C13H5orf15	0.790597	B	G	0.023118
1285	0.829186	0.0825405	2.05339	2.56934	5	C13H5orf24	0.696548	B	G	0.311018
1286	-0.826022	0.0848017	-2.036	2.53835	5	C13H5orf47	0.698078	C	G	-0.0217539
1287	-0.332965	0.584025	-0.599565	0.611611	5	C14H16orf71	0.838939	X	G	0.0926468
1288	0.132779	0.831438	0.231346	0.232035	5	C14H16orf72	0.938508	X	G	-0.166457
1289	-0.310833	0.610704	-0.556797	0.566436	5	C14H16orf91	0.849171	X	G	-0.0790291
1290	0.592934	0.291978	1.18157	1.27537	5	C14H7orf26	0.777901	D	G	0.0898423
1291	-0.950476	0.0131311	-3.18124	5.29693	5	C14H7orf50	0.474897	X	G	0.29978
1292	-0.773538	0.12488	-1.78242	2.1141	5	C15H12orf43	0.743074	A	G	-0.0486167
1293	-0.506913	0.383397	-0.967467	1.01857	5	C15H12orf49	0.805779	X	G	-0.0232095
1294	-0.699856	0.188251	-1.50172	1.69707	5	C15H12orf65	0.767629	X	G	-0.00167093
1295	-0.441737	0.456431	-0.821662	0.852829	5	C15H22orf15	0.805779	C	G	0.149048
1296	0.751563	0.142979	1.69141	1.97335	5	C15H22orf39	0.757456	X	G	0.057448
1297	0.652737	0.232431	1.35109	1.49234	5	C17H9orf116	0.767629	X	G	0.142815
1298	-0.273771	0.655829	-0.486594	0.49302	5	C17H9orf16	0.868934	X	G	-0.00236137
1299	-0.66516	0.220533	-1.38913	1.54291	5	C17H9orf78	0.767629	B	G	0.00861979
1300	0.0142856	0.981812	0.0247451	0.0247459	5	C18H17orf58	0.994328	B	G	0.541669
1301	-0.655866	0.229418	-1.36057	1.50487	5	C18H17orf67	0.767629	B	G	0.0154008
1302	-0.482955	0.409902	-0.912498	0.955298	5	C18H17orf75	0.805779	A	G	-0.32922
1303	-0.0852838	0.891545	-0.148076	0.148256	5	C18H17orf80	0.962472	B	G	-0.0551597
1304	0.0741529	0.905672	0.128673	0.128791	5	C1AH12orf29	0.9683	A	G	0.284324
1305	-0.2276	0.712732	-0.401242	0.40484	5	C1AH12orf4	0.890598	A	G	0.125845
1306	-0.408596	0.494622	-0.751579	0.775388	5	C1AH12orf40	0.805779	X	G	0.123235
1307	0.632996	0.251683	1.2928	1.41623	5	C1AH12orf45	0.767629	C	G	0.199666
1308	0.032393	0.958763	0.0561259	0.0561358	5	C1AH12orf50	0.987892	X	G	0.135519
1309	-0.627759	0.256859	-1.27775	1.39684	5	C1AH12orf66	0.767629	B	G	0.0225362
1310	-0.488568	0.403656	-0.925222	0.969855	5	C1AH12orf73	0.805779	B	G	0.0164478
1311	0.18243	0.769017	0.319556	0.321372	5	C1AH12orf75	0.915825	C	G	0.382155
1312	-0.51673	0.372659	-0.990505	1.04538	5	C1AH22orf23	0.803588	A	G	-0.0878915
1313	0.309975	0.611743	0.555152	0.564707	5	C1D	0.849544	X	G	0.070038
1314	-0.634065	0.250629	-1.2959	1.42023	5	C1GALT1	0.767629	A	G	-0.0949374
1315	0.759588	0.136286	1.72381	2.02281	5	C1GALT1C1	0.751369	X	G	0.0484153
1316	-0.503612	0.387024	-0.959788	1.00967	5	C1H11orf54	0.805779	X	G	0.301686
1317	-0.944046	0.0157544	-3.07266	4.95775	5	C1H11orf87	0.492818	X	G	-0.365243
1318	0.669581	0.216341	1.40293	1.56145	5	C1H11orf97	0.767629	X	G	0.0212391
1319	0.453623	0.442898	0.847411	0.881626	5	C1H12orf57	0.805779	X	G	-0.0779579
1320	0.679433	0.20708	1.43424	1.60386	5	C1H13orf42	0.767629	X	G	0.178134
1321	0.291026	0.634753	0.519074	0.526878	5	C1H21orf91	0.858101	C	G	0.229628
1322	-0.677194	0.209175	-1.42706	1.59408	5	C1H2orf49	0.767629	A	G	-0.261505
1323	-0.309335	0.612517	-0.553927	0.563417	5	C1H3orf38	0.849964	B	G	0.0436301
1324	-0.248262	0.687181	-0.439179	0.4439	5	C1H3orf52	0.88127	C	G	0.314944
1325	0.113226	0.856144	0.196958	0.197383	5	C1H3orf85	0.949187	F	G	-0.0346749
1326	-0.254735	0.679203	-0.451148	0.456267	5	C1HXorf21	0.878687	A	G	0.0803821
1327	-0.655004	0.230246	-1.35795	1.50141	5	C1QB	0.767629	C	G	0.105881
1328	-0.465365	0.429621	-0.873191	0.910652	5	C1QC	0.805779	C	G	0.131182
1329	0.835811	0.0778674	2.09078	2.63683	5	C1QL1	0.689636	B	G	-0.0614182
1330	-0.902432	0.036044	-2.57239	3.628	5	C1QL2	0.581759	C	G	-0.23337
1331	0.818127	0.0905252	1.99381	2.46425	5	C1QL3	0.705647	C	G	-0.087337
1332	-0.506094	0.384296	-0.965557	1.01635	5	C1QTNF1	0.805779	X	G	-0.0143502
1333	0.686151	0.200832	1.45604	1.6337	5	C1QTNF12	0.767629	B	G	0.0041081
1334	0.487824	0.404482	0.923532	0.967918	5	C1QTNF2	0.805779	F	G	-0.0394675
1335	0.345428	0.569098	0.623958	0.637542	5	C1QTNF3	0.832375	A	G	-0.192626
1336	-0.552415	0.334264	-1.07708	1.14785	5	C1QTNF4	0.78746	C	G	-0.270993
1337	0.596823	0.287998	1.19199	1.28834	5	C1QTNF5	0.776365	X	G	-0.0616135
1338	0.589467	0.295538	1.17234	1.26392	5	C1QTNF6	0.777903	X	G	-0.175001
1339	0.0362056	0.953912	0.0627373	0.062751	5	C1QTNF7	0.98667	B	G	0.018763
1340	-0.279358	0.648992	-0.497075	0.503926	5	C1QTNF8	0.865293	X	G	-0.0817676
1341	-0.704919	0.183663	-1.51903	1.72138	5	C1R	0.767629	C	G	0.148418
1342	-0.558323	0.32801	-1.09187	1.16564	5	C1S	0.786211	C	G	0.264618
1343	0.482706	0.41018	0.911936	0.954656	5	C20H20orf204	0.805779	X	G	0.0259608
1344	-0.751708	0.142857	-1.69199	1.97423	5	C20H20orf85	0.757456	X	G	-0.0969775
1345	-0.917291	0.0281968	-2.72221	3.98976	5	C21H1orf159	0.554554	X	G	0.331036
1346	-0.11785	0.850297	-0.205075	0.205554	5	C21H1orf167	0.947465	X	G	0.0851373
1347	-0.663404	0.222205	-1.38368	1.53562	5	C21H1orf174	0.767629	B	G	-0.0858064
1348	-0.643237	0.241643	-1.32273	1.4551	5	C21H1orf50	0.767629	X	G	0.0774716
1349	-0.341739	0.573508	-0.616715	0.629829	5	C22H2orf42	0.833214	D	G	-0.133911
1350	0.539584	0.347952	1.04541	1.11005	5	C22H2orf68	0.791981	B	G	-0.116824
1351	-0.609762	0.274859	-1.22723	1.33253	5	C22H8orf58	0.768144	X	G	-0.0885422
1352	-0.553105	0.333533	-1.0788	1.14991	5	C23H1orf109	0.787262	X	G	0.0153037
1353	0.653327	0.231862	1.35287	1.49469	5	C23H1orf216	0.767629	D	G	0.0668114
1354	0.818831	0.0900101	1.9975	2.47068	5	C23H1orf232	0.70554	X	G	0.184118
1355	-0.466341	0.428521	-0.875352	0.913093	5	C24H11orf52	0.805779	C	G	0.0746929
1356	NA	NA	NA	NA	5	C24H11orf53	NA	X	G	-0.035565
1357	-0.548031	0.338925	-1.06619	1.13481	5	C25H1orf189	0.788175	X	G	-0.0977673
1358	-0.457617	0.438372	-0.85614	0.891432	5	C25H1orf43	0.805779	D	G	-0.303207
1359	0.641708	0.243136	1.31821	1.44921	5	C26H1orf116	0.767629	X	G	0.241152
1360	0.209532	0.735181	0.368375	0.371159	5	C26H1orf162	0.898519	A	G	-0.243714
1361	-0.171231	0.783053	-0.299531	0.301026	5	C26H1orf74	0.922193	B	G	0.165786
1362	-0.370586	0.53919	-0.673944	0.691079	5	C26H6orf132	0.821141	X	G	-0.0518374
1363	-0.74078	0.152119	-1.64927	1.91005	5	C26H6orf89	0.763044	C	G	-0.139295
1364	-0.241672	0.695316	-0.427036	0.431375	5	C27H17orf113	0.883831	A	G	0.161431
1365	0.253824	0.680326	0.44946	0.454522	5	C28H19orf25	0.87896	D	G	-0.0593222
1366	-0.00688633	0.991232	-0.0119277	0.0119277	5	C28H19orf44	0.997122	X	G	0.0341625
1367	-0.0168222	0.978582	-0.0291397	0.0291411	5	C2CD2	0.994328	X	G	-0.110123
1368	-0.764943	0.131873	-1.74595	2.05702	5	C2CD2L	0.748264	B	G	0.0518626
1369	-0.606894	0.277758	-1.21935	1.32259	5	C2CD3	0.77006	A	G	-0.133009
1370	-0.469114	0.425401	-0.881498	0.920047	5	C2CD4C	0.805779	B	G	0.115959
1371	-0.832621	0.0801069	-2.07261	2.60388	5	C2CD5	0.695346	X	G	0.0208835
1372	0.0419802	0.946565	0.0727546	0.072776	5	C2H18orf21	0.984137	X	G	0.118766
1373	0.498126	0.39307	0.947103	0.995011	5	C2H18orf63	0.805779	X	G	0.0340131
1374	0.568197	0.317621	1.11692	1.19596	5	C2H1orf35	0.783242	D	G	0.0803362
1375	-0.375273	0.533652	-0.683375	0.701244	5	C2H5orf22	0.818573	A	G	0.23905
1376	-0.723144	0.167418	-1.58345	1.81342	5	C2H5orf49	0.767629	A	G	0.277177
1377	-0.664923	0.220759	-1.38839	1.54192	5	C2H6orf62	0.767629	X	G	0.099704
1378	-0.287654	0.638863	-0.512699	0.520219	5	C2H7orf25	0.860552	X	G	0.317365
1379	0.267148	0.663947	0.474219	0.480166	5	C2H7orf31	0.872335	X	G	0.305154
1380	0.832376	0.0802799	2.07122	2.60138	5	C2H8orf34	0.695346	F	G	0.467918
1381	-0.627333	0.257281	-1.27653	1.39528	5	C2H8orf37	0.767629	A	G	-0.124975
1382	0.509547	0.380509	0.973616	1.02571	5	C2H8orf76	0.805075	A	G	-0.106843
1383	0.55693	0.329481	1.08837	1.16142	5	C2H8orf88	0.786861	X	G	0.0655698
1384	0.612372	0.272228	1.23445	1.34164	5	C2H9orf152	0.767629	X	G	0.0812555
1385	-0.869457	0.0554975	-2.3051	3.04841	5	C3	0.647988	X	G	0.111876
1386	0.11387	0.85533	0.198088	0.19852	5	C3AR1	0.94889	X	G	-0.0211974
1387	-0.662319	0.223239	-1.38033	1.53115	5	C3H1orf115	0.767629	C	G	-0.245004
1388	-0.58769	0.297367	-1.16763	1.2581	5	C3H1orf131	0.777942	X	G	0.196441
1389	-0.209323	0.73544	-0.367998	0.370773	5	C3H1orf198	0.898729	B	G	0.17443
1390	-0.74658	0.147182	-1.67175	1.94367	5	C3H2orf50	0.758523	X	G	-0.102711
1391	-0.0544993	0.930644	-0.0944893	0.0945361	5	C3H6orf120	0.977848	A	G	-0.078415
1392	-0.233152	0.705853	-0.411397	0.415277	5	C3H6orf58	0.88835	X	G	0.135158
1393	-0.794418	0.108379	-1.87632	2.26545	5	C4AH8orf48	0.729709	A	G	-0.281155
1394	-0.710171	0.178937	-1.53725	1.74716	5	C4AHXorf56	0.767629	X	G	0.0884966
1395	-0.433361	0.466021	-0.803719	0.832874	5	C4H20orf194	0.805779	A	G	-0.167904
1396	-0.819419	0.0895802	-2.0006	2.47608	5	C4H20orf27	0.70554	D	G	-0.051974
1397	-0.666147	0.219595	-1.3922	1.54702	5	C4H4orf19	0.767629	B	G	0.400938
1398	-0.480755	0.412356	-0.907536	0.949636	5	C4H4orf46	0.805779	X	G	0.0478536
1399	-0.56268	0.323414	-1.10288	1.17893	5	C4H4orf50	0.784376	K	G	-0.07345
1400	0.704751	0.183815	1.51845	1.72057	5	C4H4orf54	0.767629	X	G	-0.00849386
1401	-0.349054	0.564767	-0.631102	0.645159	5	C5	0.830779	X	G	0.122927
1402	-0.683161	0.203606	-1.44629	1.62032	5	C5H11orf16	0.767629	C	G	0.069171
1403	-0.826383	0.0845424	-2.03797	2.54185	5	C5H11orf24	0.698078	X	G	-0.120151
1404	-0.551845	0.33487	-1.07566	1.14614	5	C5H11orf49	0.78776	X	G	-0.397588
1405	-0.659587	0.225849	-1.37193	1.51995	5	C5H11orf58	0.767629	A	G	0.0412416
1406	0.895017	0.040184	2.50557	3.47556	5	C5H11orf91	0.591112	X	G	0.196254
1407	-0.409799	0.493224	-0.754081	0.77813	5	C5H11orf94	0.805779	X	G	-0.0472936
1408	-0.149138	0.810817	-0.260256	0.261237	5	C5H11orf96	0.932523	F	G	-0.204744
1409	-0.953783	0.0118441	-3.24255	5.49758	5	C5H14orf132	0.470121	A	G	-0.300816
1410	0.241748	0.695222	0.427175	0.431518	5	C5H14orf180	0.883831	X	G	-0.00806381
1411	-0.449628	0.447437	-0.838719	0.871883	5	C5H14orf39	0.805779	C	G	0.255493
1412	0.407726	0.495632	0.749772	0.773408	5	C5H15orf41	0.805779	D	G	0.270198
1413	-0.459857	0.435838	-0.861053	0.896961	5	C5H15orf62	0.805779	B	G	0.369466
1414	0.98936	0.00131542	4.53012	11.7783	5	C6	0.328232	A	G	-0.0251381
1415	0.612372	0.272228	1.23445	1.34164	5	C6H10orf105	0.767629	X	G	-0.04046
1416	-0.025349	0.967728	-0.0439152	0.0439199	5	C6H10orf143	0.991106	X	G	-0.121341
1417	0.681794	0.204878	1.44186	1.61426	5	C6H10orf71	0.767629	F	G	0.280154
1418	0.671409	0.214614	1.40869	1.5692	5	C6H10orf88	0.767629	B	G	0.0369722
1419	0.0369713	0.952937	0.0640653	0.0640799	5	C6H10orf90	0.986209	I	G	-0.325716
1420	-0.559455	0.326814	-1.09472	1.16908	5	C6H10orf95	0.785774	A	G	-0.187482
1421	0.42764	0.472595	0.791556	0.819398	5	C7	0.805779	X	G	0.0677119
1422	0.605624	0.279043	1.21587	1.31822	5	C7H21orf58	0.770138	A	G	0.0764656
1423	0.298428	0.625747	0.533114	0.541571	5	C7H2orf66	0.853255	X	G	-0.010475
1424	-0.73563	0.156542	-1.62967	1.88099	5	C7H2orf69	0.764627	F	G	0.0973029
1425	-0.466226	0.42865	-0.875096	0.912804	5	C7H2orf76	0.805779	X	G	0.034402
1426	-0.773352	0.125031	-1.78161	2.11283	5	C7H2orf88	0.743439	C	G	-0.167496
1427	-0.367416	0.542941	-0.667589	0.684242	5	C8A	0.822909	X	G	-0.0871486
1428	-0.300019	0.623814	-0.53614	0.544743	5	C8B	0.852747	A	G	0.0850334
1429	0.856459	0.0638585	2.21686	2.87367	5	C8G	0.667808	A	G	0.180504
1430	-0.415402	0.486726	-0.765777	0.79097	5	C8H1orf112	0.805779	A	G	0.272211
1431	-0.42046	0.480874	-0.776394	0.802656	5	C8H1orf146	0.805779	E	G	-0.0242366
1432	-0.107005	0.864018	-0.18605	0.186408	5	C8H1orf21	0.951653	A	G	-0.0073069
1433	-0.408248	0.495025	-0.750857	0.774597	5	C8H1orf210	0.805779	X	G	-0.0989979
1434	-0.227242	0.713177	-0.400587	0.404168	5	C8H1orf52	0.890761	A	G	-0.104082
1435	-0.868468	0.0561204	-2.29811	3.03428	5	C9	0.647988	X	G	0.0546166
1436	-0.816055	0.0920457	-1.98301	2.44552	5	C9H17orf50	0.706846	X	G	0.0203806
1437	-0.0526215	0.933031	-0.0912274	0.0912695	5	C9H2orf72	0.979335	X	G	0.196153
1438	0.091012	0.88428	0.158075	0.158294	5	C9H3orf33	0.96052	B	G	0.0121323
1439	-0.605924	0.27874	-1.21669	1.31925	5	C9H3orf70	0.77006	B	G	0.23936
1440	0.837537	0.0766634	2.10075	2.65503	5	C9orf72	0.687465	E	G	0.175783
1441	-0.568948	0.316834	-1.11885	1.1983	5	CA10	0.783043	B	G	0.0940318
1442	0.63261	0.252064	1.29169	1.41479	5	CA12	0.767629	E	G	0.10384
1443	0.306195	0.616321	0.547919	0.557103	5	CA14	0.850724	C	G	-0.106164
1444	0.670381	0.215585	1.40544	1.56483	5	CA4	0.767629	X	G	-0.0388852
1445	-0.640707	0.244113	-1.31527	1.44537	5	CA5A	0.767629	C	G	-0.10288
1446	0.978217	0.00384663	3.90476	8.1621	5	CA6	0.354649	B	G	-0.0662203
1447	0.618064	0.266516	1.25031	1.36176	5	CA7	0.767629	C	G	0.269098
1448	-0.960866	0.00923846	-3.38975	6.00789	5	CA8	0.445939	B	G	-0.0500417
1449	0.868401	0.0561625	2.29764	3.03334	5	CAAP1	0.647988	E	G	0.280781
1450	-0.543819	0.343419	-1.05579	1.1224	5	CAB39	0.790646	A	G	-0.0913864
1451	0.34433	0.570409	0.621801	0.635243	5	CAB39L	0.832375	B	G	0.455053
1452	-0.656696	0.228621	-1.36309	1.50822	5	CABCOCO1	0.767629	A	G	-0.284569
1453	-0.443875	0.453991	-0.826268	0.857966	5	CABIN1	0.805779	B	G	0.23844
1454	-0.792894	0.109559	-1.86919	2.25373	5	CABLES1	0.731474	B	G	-0.28544
1455	0.956715	0.01074	3.3006	5.69388	5	CABLES2	0.458378	F	G	0.310301
1456	0.620253	0.264326	1.25646	1.36959	5	CABP1	0.767629	G	G	0.798413
1457	-0.498842	0.392279	-0.948755	0.996917	5	CABP2	0.805779	A	G	0.110733
1458	-0.793935	0.108753	-1.87406	2.26172	5	CABP7	0.731056	X	G	-0.123959
1459	-0.674491	0.211712	-1.41844	1.58239	5	CACFD1	0.767629	A	G	-0.0320547
1460	-0.00874829	0.988861	-0.0151529	0.0151531	5	CACHD1	0.996237	A	G	-0.370165
1461	0.748636	0.145443	1.67982	1.95583	5	CACNA1B	0.758163	X	G	0.305796
1462	0.843922	0.0722616	2.13847	2.72472	5	CACNA1C	0.684744	A	G	-0.140429
1463	-0.0701355	0.910774	-0.121678	0.121778	5	CACNA1D	0.970418	B	G	0.0948878
1464	0.309838	0.611908	0.554891	0.564432	5	CACNA1E	0.84955	B	G	0.0352821
1465	-0.518305	0.370943	-0.99423	1.04974	5	CACNA1G	0.802807	A	G	-0.247183
1466	-0.0749497	0.904661	-0.130061	0.130183	5	CACNA1H	0.9683	C	G	-0.205943
1467	-0.270151	0.660264	-0.479825	0.485986	5	CACNA1I	0.870226	C	G	0.0229337
1468	0.224361	0.71675	0.39533	0.398771	5	CACNA1S	0.892563	X	G	-0.204095
1469	-0.723538	0.167071	-1.58488	1.81549	5	CACNA2D1	0.767629	B	G	-0.024671
1470	0.987825	0.00160959	4.41279	10.9983	5	CACNA2D2	0.330056	C	G	0.121258
1471	-0.965069	0.00779584	-3.49	6.38005	5	CACNA2D3	0.430837	A	G	-0.219988
1472	-0.390944	0.515222	-0.715189	0.735686	5	CACNA2D4	0.813356	X	G	-0.118127
1473	0.168592	0.786363	0.294825	0.296251	5	CACNB1	0.923159	A	G	-0.277886
1474	-0.96506	0.00779896	-3.48977	6.37915	5	CACNB2	0.430837	B	G	0.0574222
1475	0.723531	0.167077	1.58485	1.81545	5	CACNB3	0.767629	D	G	0.14921
1476	-0.141121	0.820917	-0.246072	0.2469	5	CACNB4	0.934348	C	G	-0.241853
[truncated: 19,314 more rows]

## Sheet: e2_response_suppl
	cor	p	Z	t	nObs	gene_id	q	me_assigned	module	membership
[truncated: 20,790 more rows]
